# Supplementary material
Source: PubMed Central journal article supplement (PMC5935517)
Supplement: NIHMS959623-supplement-si.pdf [file NIHMS959623-supplement-si.pdf]

## **Photoactivatable Sensors for Detecting Mobile Zinc**

Jacob M. Goldberg,<sup>†,§</sup> Fang Wang,<sup>†,§</sup> Chanan D. Sessler,<sup>†</sup> Nathan W. Vogler,<sup>‡</sup> Daniel Y. Zhang,<sup>†</sup> William H. Loucks,<sup>†</sup> Thanos Tzounopoulos,<sup>‡</sup> and Stephen J. Lippard<sup>\*†</sup>

<sup>†</sup>Department of Chemistry, Massachusetts Institute of Technology, 77 Massachusetts Avenue,  
Cambridge, MA 02139, United States

<sup>‡</sup>Pittsburgh Hearing Research Center, Department of Otolaryngology, University of Pittsburgh, 3501 Fifth  
Avenue, Pittsburgh, Pennsylvania 15261, United States

## General Materials and Methods.

Reagents were purchased from commercial sources and used as received. Zinpyr-1 (ZP1) and the diacetylated derivative DA-ZP1 were synthesized as previously described.<sup>1-2</sup> NMR spectra were acquired on a 400 MHz Bruker AVANCE-400 spectrometer. <sup>1</sup>H NMR chemical shifts are reported in ppm relative to that of SiMe<sub>4</sub> ( $\delta = 0.00$ ) and were referenced internally to residual solvent peaks.<sup>3</sup> Low-resolution electrospray mass spectra were acquired on an Agilent 1100 Series LC/MSD Trap spectrometer. High-resolution mass spectra were acquired on a Bruker Daltonics APEXIV 4.7 tesla Fourier transform ion cyclotron resonance mass spectrometer at the MIT Department of Chemistry Instrumentation Facility. Compounds were purified using Agilent 1200 Series HPLC systems fitted with multi-wavelength detectors and automated fraction collectors using a C18 reverse stationary phase (Zorbax-SB C18 columns: preparative, 7  $\mu\text{m}$ , 21.2  $\times$  250 mm; semi-preparative, 5  $\mu\text{m}$  9.4  $\times$  250 mm; and analytical, 5  $\mu\text{m}$ , 4.6  $\times$  250 mm) and a mobile phase composed of two solvents (A: H<sub>2</sub>O + 0.1% (v/v) CF<sub>3</sub>CO<sub>2</sub>H; B: CH<sub>3</sub>CN + 0.1% (v/v) CF<sub>3</sub>CO<sub>2</sub>H). UV-visible spectra were recorded on a Varian Cary 50 Bio UV-visible spectrophotometer. Fluorescence measurements were made with a Photon Technologies International 4L-format scanning spectrofluorometer equipped with a temperature-controlled, 4-position sample turret. Quartz cuvettes with 1.00 cm path lengths were used for all spectroscopic measurements. Milli-Q purified water with resistivity of at least 18 M $\Omega$ ·cm<sup>-1</sup> was used to prepare all buffers. Aqueous buffers were treated with Chelex® resin according to the manufacturer's instructions prior to use.

## Chemical Synthesis.

**Scheme S1.** Synthesis of 2-(bromomethyl)-1-nitro-3-(trifluoromethyl)benzene (**S1**).

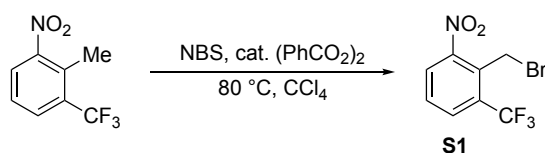

### 2-(Bromomethyl)-1-nitro-3-(trifluoromethyl)benzene (**S1**)

In a 50 mL round-bottom pressure vessel, 2-methyl-1-nitro-3-(trifluoromethyl)benzene (1026 mg, 5.00 mmol), *N*-bromosuccinimide (NBS, 797 mg, 5.50 mmol), and benzoyl peroxide (61 mg, 0.25 mmol) were mixed with CCl<sub>4</sub> (30 mL). The reaction was heated at 80 °C (oil bath temperature) in ambient light. Additional NBS (445 mg, 0.5 equiv) was added at 24 h. Another portion of NBS (223 mg, 0.25 equiv) was added at 48 h. After 72 h, the solvent was evaporated under vacuum and the crude product was purified by column chromatography (EtOAc:hexanes = 1:8 to 1:6). A colorless oil was obtained (951 mg, 67% yield). <sup>1</sup>H NMR (400 MHz, CDCl<sub>3</sub>)  $\delta$  8.06 (dd,  $J = 8.2, 0.9$  Hz, 1H), 7.94 (d,  $J = 8.0$  Hz, 1H), 7.63 (tq,  $J = 8.1, 0.8$  Hz, 1H), 4.93 (s, 2H). <sup>19</sup>F NMR (376 MHz, CDCl<sub>3</sub>)  $\delta$  -59.4 (s, 3F). EI-MS(+)  $m/z$  calcd for [M]<sup>+</sup> 283, found 283. Spectroscopic data are consistent with reported values.<sup>4</sup>

**Scheme S2.** Synthesis of 1-(bromomethyl)-3,4,5-trimethoxy-2-nitro-6-(trifluoromethyl)benzene (**S4**).

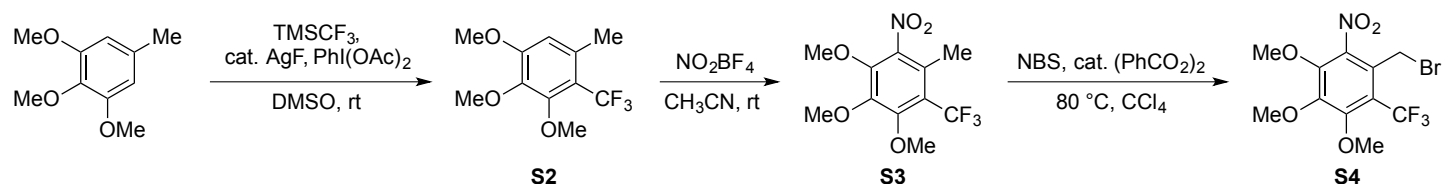

**1,2,3-Trimethoxy-5-methyl-4-(trifluoromethyl)benzene (S2)**

Anhydrous  $\text{DMSO}$  (36 mL) was added through a syringe to a Schlenk flask containing 3,4,5-trimethoxytoluene (3.28 g, 18.0 mmol),  $\text{PhI}(\text{OAc})_2$  (11.6 g, 36.0 mmol), and  $\text{AgF}$  (571 mg, 4.50 mmol).  $\text{TMSCF}_3$  (5.31 mL, 36.0 mmol) was added to the flask dropwise. The slightly exothermic reaction was stirred under an inert atmosphere for 12 h. The reaction was mixed with brine (100 mL) and  $\text{EtOAc}$  (30 mL). The mixture was then filtered and the solid was washed with  $\text{EtOAc}$  (15 mL). The organic phase was isolated and the aqueous phase was extracted with  $\text{EtOAc}$  (30 mL  $\times$  3). The combined organic phase was washed with brine (30 mL  $\times$  3) and dried over  $\text{MgSO}_4$ . The solvent was evaporated under vacuum. The crude product was purified by column chromatography ( $\text{EtOAc}$ :hexanes = 1:8). A slightly yellow oil was obtained (2.65 g, 59% yield).  $^1\text{H}$  NMR (400 MHz,  $\text{CDCl}_3$ )  $\delta$  6.49 (s, 1H), 3.91 (s, 3H), 3.88 (s, 3H), 3.85 (s, 3H), 2.43 (qd,  $J_{\text{H-F,through space}} = 3.5$  Hz,  $J_{\text{H-H,through space}} = 0.5$  Hz, 3H).  $^{19}\text{F}$  NMR (376 MHz,  $\text{CDCl}_3$ )  $\delta$  -54.8 (q,  $J_{\text{H-F,through space}} = 3.5$  Hz, 3F). EI-MS(+)  $m/z$  calcd for  $[\text{M}]^+$  250, found 250. Spectroscopic data are consistent with reported values.<sup>5</sup>

**1,2,3-Trimethoxy-5-methyl-4-nitro-6-(trifluoromethyl)benzene (S3)**

In a glovebox,  $\text{NO}_2\text{BF}_4$  (1.11 g, 8.40 mmol) was added in one portion to 1,2,3-trimethoxy-5-methyl-4-(trifluoromethyl)benzene (**S2**, 1.75 g, 7.00 mmol) in anhydrous  $\text{CH}_3\text{CN}$  (70 mL). The reaction was stirred at room temperature for 30 min. The reaction mixture was removed from the glovebox and quenched with  $\text{H}_2\text{O}$  (100 mL). The mixture was extracted with  $\text{CH}_2\text{Cl}_2$  (50 mL  $\times$  3). The organic phase was dried over  $\text{MgSO}_4$ . The crude product was purified by column chromatography ( $\text{EtOAc}$ :hexanes = 1:8). A white solid was obtained (378 mg, 18% yield).  $^1\text{H}$  NMR (400 MHz,  $\text{CDCl}_3$ )  $\delta$  4.02 (s, 3H), 3.94 (s, 3H), 3.91 (s, 3H), 2.28 (q,  $J_{\text{F-H,through space}} = 3.0$  Hz, 3H).  $^{13}\text{C}$  NMR (101 MHz,  $\text{CDCl}_3$ )  $\delta$  155.4 (q,  $^3J_{\text{C-F}} = 1.7$  Hz), 148.0, 145.4, 143.9, 124.8 (q,  $^3J_{\text{C-F}} = 1.6$  Hz), 123.8 (q,  $^1J_{\text{C-F}} = 275.5$  Hz), 119.0 (q,  $^2J_{\text{C-F}} = 29.6$  Hz), 62.4, 62.2 (q,  $J_{\text{C-F,through space}} = 0.9$  Hz), 61.3, 14.6 (q,  $J_{\text{C-F,through space}} = 4.6$  Hz).  $^{19}\text{F}$  NMR (376 MHz,  $\text{CDCl}_3$ )  $\delta$  -55.0 (q,  $J_{\text{F-H,through space}} = 2.9$  Hz, 3F). EI-MS(+)  $m/z$  calcd for  $[\text{M}]^+$  295, found 295.

### 1-(Bromomethyl)-3,4,5-trimethoxy-2-nitro-6-(trifluoromethyl)benzene (S4)

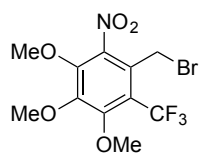

In a 150 mL round bottom pressure vessel, 1,2,3-trimethoxy-5-methyl-4-nitro-6-(trifluoromethyl)benzene (**S3**, 354 mg, 1.20 mmol), NBS (214 mg, 1.20 mmol), and benzoyl peroxide (9.7 mg, 0.04 mmol) were mixed with  $\text{CCl}_4$  (60 mL). The reaction was heated at 80 °C (oil bath temperature) in ambient light. Additional NBS (642 mg, 3.0 equiv) was added in three equal portions at 24 h, 48 h, and 72 h. After 96 h, the solvent was evaporated under vacuum and the crude product was purified by column chromatography (EtOAc:hexanes = 1:8). A white solid was obtained (181 mg, 40% yield). The starting material was recovered as a white solid (195 mg, 55% recovered).  $^1\text{H}$  NMR (400 MHz,  $\text{CDCl}_3$ )  $\delta$  4.47 (q,  $J_{\text{F-H,through space}} = 1.0$  Hz, 2H), 4.04 (s, 3H), 3.98 (s, 3H), 3.95 (s, 3H).  $^{13}\text{C}$  NMR (101 MHz,  $\text{CDCl}_3$ )  $\delta$  155.9 (q,  $^3J_{\text{C-F}} = 1.6$  Hz), 148.6, 147.8, 143.4, 123.8 (q,  $^3J_{\text{C-F}} = 1.2$  Hz), 123.4 (q,  $^1J_{\text{C-F}} = 275.9$  Hz), 118.7 (q,  $^2J_{\text{C-F}} = 30.1$  Hz), 62.6, 62.3 (q,  $J_{\text{C-F,through space}} = 0.8$  Hz), 61.3, 21.5 (q,  $J_{\text{C-F,through space}} = 5.3$  Hz).  $^{19}\text{F}$  NMR (376 MHz,  $\text{CDCl}_3$ )  $\delta$  -55.2 (s, 3F). EI-MS(+)  $m/z$  calculated for  $[\text{M}]^+$  373, found 373.

### Scheme S3. Synthesis of Protected Sensors (1-4).

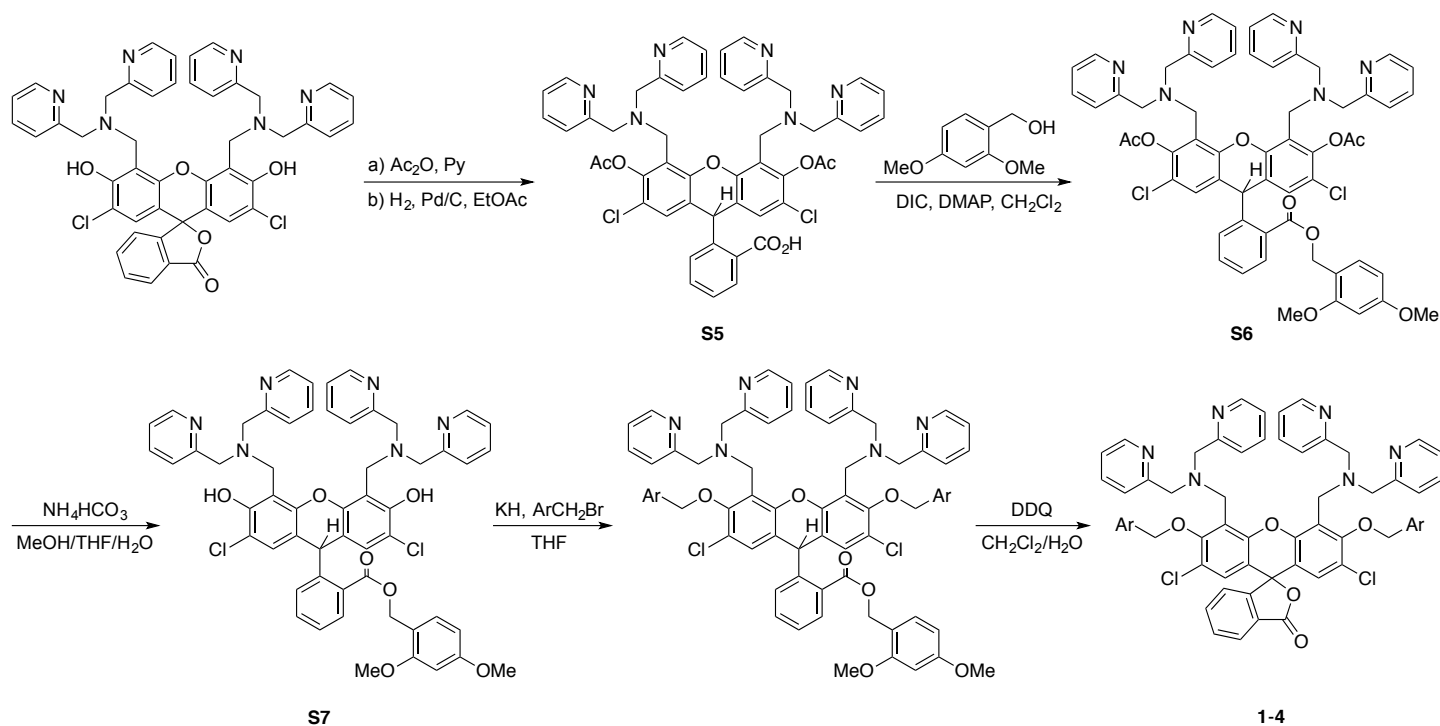

## 2-(3,6-Diacetoxy-4,5-bis((bis(pyridin-2-ylmethyl)amino)methyl)-2,7-dichloro-9H-xanthen-9-yl)benzoic acid (S5)

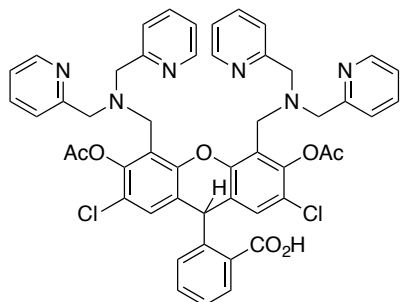

DA-ZP1 (1.09 g, 1.20 mmol) was dissolved in EtOAc (250 mL). The mixture was degassed with N<sub>2</sub> for 15 min. A portion of Pd/C (250 mg, 10 wt %) was added and the reaction was stirred under an H<sub>2</sub> atmosphere for 24 h. Additional Pd/C (500 mg) was added in two equal portions at 24 h and 48 h. After 72 h, the reaction was monitored by ESI-MS to confirm completion of the reduction.

The reaction mixture was flushed with N<sub>2</sub> and filtered through Celite. The filtrate was then filtered through a 0.2 μm PTFE syringe filter. The solvent was removed under vacuum to give a slightly pink foam (1.09 g, 100%). The solid was used directly in the next step without further purification. MS (ESI+): *m/z* calcd for [M+H]<sup>+</sup> 909.3, found 909.3.

## 4,5-Bis((bis(pyridin-2-ylmethyl)amino)methyl)-2,7-dichloro-9-(2-(((2,4-dimethoxybenzyl)oxy)carbonyl)phenyl)-9H-xanthene-3,6-diyl diacetate (S6)

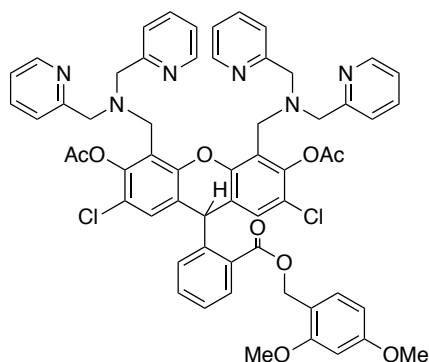

Compound S5 (1.09 g, 1.20 mmol), *N,N'*-diisopropylcarbodiimide (DIC, 681 mg, 836 μL, 5.40 mmol), and 4-dimethylaminopyridine (DMAP, 7.3 mg, 0.06 mmol) were dissolved in CH<sub>2</sub>Cl<sub>2</sub> (60 mL). A portion of 2,4-dimethoxybenzyl alcohol (0.90 g, 5.4 mmol) was then added. The reaction was stirred in the dark for 18 h at room temperature. The solvent was removed under vacuum. The crude product was analyzed by ESI-MS to confirm completion of the reaction and used directly without further purification.

MS (ESI+): *m/z* calcd for [M+H]<sup>+</sup> 1059.3, found 1059.4.

## 2,4-Dimethoxybenzyl 2-(4,5-bis((bis(pyridin-2-ylmethyl)amino)methyl)-2,7-dichloro-3,6-dihydroxy-9H-xanthen-9-yl)benzoate (S7)

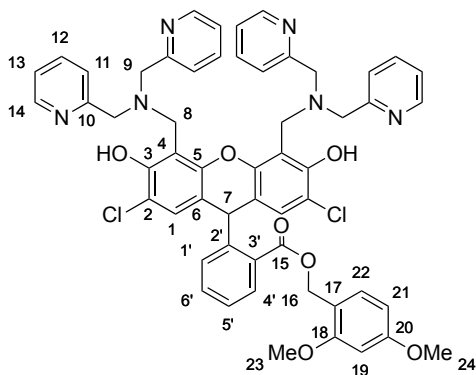

Compound S6 (ca. 1.20 mmol, crude) was dissolved in a mixture of THF (120 mL) and MeOH (60 mL). An aqueous solution of NH<sub>4</sub>HCO<sub>3</sub> (1.93 g, 24.4 mmol, in 60 mL of H<sub>2</sub>O) was then added. The reaction was stirred in the dark at room temperature and monitored by ESI-MS. Deacetylation was complete after 3 days. The organic solvents were removed with a rotavap. The crude product in water was dissolved in CH<sub>3</sub>CN (ca. 350 mL) and purified by preparative HPLC using solvent

gradient 1 (Table S1). Fractions containing the desired product (*t*<sub>R</sub> = 11.2 min) were combined and lyophilized to give a light orange solid (61 mg, 51%). <sup>1</sup>H NMR (400 MHz, CD<sub>3</sub>CN) δ 8.67 (d, *J* = 5.6 Hz, 4H), 8.10 (t, *J* = 7.8 Hz, 4H), 7.71 (dd, *J* = 7.9, 1.4 Hz, 1H), 7.68 (d, *J* = 8.2 Hz, 4H), 7.63 (t, *J* = 6.7 Hz, 4H), 7.41 (td, *J* = 7.7,

1.4 Hz, 1H), 7.32 – 7.24 (m, 2H), 6.99 (d,  $J = 8.5$  Hz, 1H), 6.70 (s, 2H), 6.50 (s, 1H), 6.49 (dd,  $J = 8.0, 3.6$  Hz, 1H), 5.72 (s, 1H), 5.23 (s, 2H), 4.37 (s, 8H), 4.17 (pseudo q, AB system,  $J = 13.6$  Hz, 4H), 3.76 (s, 3H), 3.72 (s, 3H).  $^{13}\text{C}$  NMR (101 MHz,  $\text{CD}_3\text{CN}$ )  $\delta$  168.9, 162.7, 160.1, 155.2, 152.7, 148.7, 146.5, 144.6, 144.3, 133.3, 132.6, 132.0, 131.2, 130.5, 130.2, 128.0, 126.7, 126.1, 117.6, 116.9, 116.8, 112.8, 105.4, 99.3, 63.7, 58.0, 56.3, 56.0, 49.7, 38.8. ESI-MS(+)  $m/z$  calcd for  $[\text{M}+\text{H}]^+$  975.3, found 975.2.

### General procedure for preparation of **1** and other derivatives.

In an anaerobic glovebox, potassium hydride (7.6 mg, 0.192 mmol) was added to a Schlenk flask containing a solution of **S7** (31.2 mg, 0.032 mmol) in THF (4 mL). The reaction was stirred at room temperature for 30 min before the addition of *o*-nitrobenzyl bromide (34.6 mg, 0.320 mmol). The reaction flask was wrapped with aluminum foil and the reaction was stirred overnight. The reaction was monitored by ESI-MS(+) to confirm the formation of the desired product ( $m/z$  calcd for  $[\text{M}+\text{H}]^+ = 1245.4$ , found 1245.5). The Schlenk flask was removed from the glovebox and attached to a manifold. The reaction was quenched with water (0.1 mL) and the solvent was evaporated. The crude product was stirred with  $\text{CH}_2\text{Cl}_2/\text{H}_2\text{O}$  (3.0 mL/0.6 mL). A portion of 2,3-dichloro-5,6-dicyano-1,4-benzoquinone (DDQ, 72.6 mg, 0.320 mmol) was added and the reaction was stirred at room temperature in the dark for 24 h. The organic solvent was evaporated and the residue was dissolved in  $\text{CH}_3\text{CN}/\text{H}_2\text{O}$  (27 mL/27 mL). Insoluble material was removed by filtration through a 0.2  $\mu\text{m}$  PTFE syringe filter. The crude product was purified by preparative and semi-preparative HPLC using the solvent gradients indicated below. Fractions containing the desired compound were combined and lyophilized.

### 4',5'-Bis((bis(pyridin-2-ylmethyl)amino)methyl)-2',7'-dichloro-3',6'-bis((2-nitrobenzyl)oxy)-3H-spiro[isobenzofuran-1,9'-xanthen]-3-one (**1**)

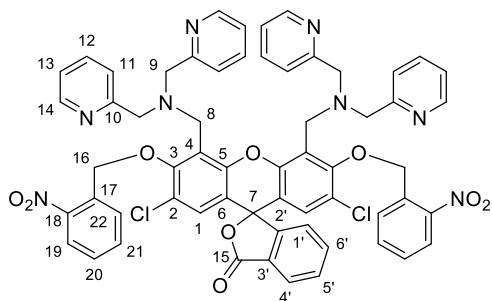

This compound was prepared by using **S7** (0.032 mmol) and *o*-nitrobenzyl bromide (0.32 mmol) according to the general procedure. The crude material was purified by preparative HPLC using solvent gradient 2 (Table S1). Further purification by semi-preparative HPLC using solvent gradient 3 (Table S1) afforded a slightly yellow solid (19.7 mg, 56% yield). UV ( $\text{CH}_3\text{CN}$ )  $\epsilon_{254} = 45,500 \text{ M}^{-1}\cdot\text{cm}^{-1}$ .  $^1\text{H}$  NMR

(400 MHz,  $\text{CD}_3\text{CN}$ )  $\delta$  8.49 (dd,  $J = 5.2, 0.7$  Hz, 4H), 8.14 (dd,  $J = 8.2, 1.2$  Hz, 2H), 8.05 (d,  $J = 7.9$  Hz, 2H), 8.02 (dt,  $J = 7.7, 0.9$  Hz, 1H), 7.90 – 7.72 (m, 8H), 7.61 (pseudo dt,  $J = 8.2, 1.4$  Hz, 2H), 7.42 (d,  $J = 7.9$  Hz, 4H), 7.38 (dd,  $J = 7.0, 6.0$  Hz, 4H), 7.22 (d,  $J = 7.7$  Hz, 1H), 6.73 (s, 2H), 5.40 (s, 4H), 4.32 (pseudo dd,  $J = 20.7, 12.7$  Hz, 4H), 4.26 (s, 8H).  $^{13}\text{C}$  NMR (101 MHz,  $\text{CD}_3\text{CN}$ )  $\delta$  169.1, 157.3, 156.3, 151.5, 150.0, 147.9, 146.2, 141.9, 136.9, 135.3, 133.7, 131.9, 130.0, 129.8(0), 129.7(8), 127.5, 126.6, 125.9, 125.4, 125.0, 124.9, 124.6, 122.3, 117.7, 81.6, 73.1, 59.3, 50.2. ESI-HRMS(+)  $m/z$  calcd for  $\text{C}_{60}\text{H}_{47}\text{Cl}_2\text{N}_8\text{O}_9^+$   $[\text{M}+\text{H}]^+$  1093.2838, found 1093.2819.

**4',5'-Bis((bis(pyridin-2-ylmethyl)amino)methyl)-2',7'-dichloro-3',6'-bis((4,5-dimethoxy-2-nitrobenzyl)oxy)-3H-spiro[isobenzofuran-1,9'-xanthen]-3-one (2)**

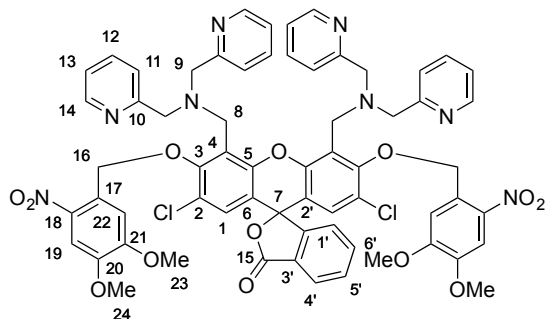

This compound was prepared by using **S7** (0.040 mmol) and 4,5-dimethoxy-2-nitrobenzyl bromide (0.40 mmol) according to the general procedure. The crude material was purified by preparative HPLC using solvent gradient 4 (Table S1). Further purification by semi-preparative HPLC using solvent gradient 5 (Table S1) afforded a slightly yellow solid (21.8 mg, 45% yield). UV (CH<sub>3</sub>CN)

$\epsilon_{254} = 55,300 \text{ M}^{-1}\cdot\text{cm}^{-1}$  and  $\epsilon_{300} = 14,700 \text{ M}^{-1}\cdot\text{cm}^{-1}$ . <sup>1</sup>H NMR (400 MHz, CD<sub>3</sub>CN)  $\delta$  8.48 (br dd,  $J = 5.3, 0.7$  Hz, 4H), 8.02 (d,  $J = 7.7$  Hz, 1H), 7.89 (td,  $J = 7.8, 1.5$  Hz, 4H), 7.87 (td,  $J = 7.9, 1.1$  Hz, 1H, overlap with H12), 7.77 (td,  $J = 7.6, 0.8$  Hz, 1H), 7.71 (s, 2H), 7.45 (s, 2H), 7.44 (d,  $J = 8.5$  Hz, 4H), 7.41 (ddd,  $J = 6.4, 1.9, 0.8$  Hz, 4H), 7.23 (d,  $J = 7.7$  Hz, 1H), 6.74 (s, 2H), 5.35 (s, 4H), 4.36 (d,  $J = 12.6$  Hz, 1H), 4.33 (pseudo dd, AB system,  $J = 12.6, 7.3$  Hz, 4H) 4.28 (d,  $J = 2.0$  Hz, 8H), 3.96 (s, 6H), 3.94 (s, 6H). <sup>13</sup>C NMR (101 MHz, CD<sub>3</sub>CN)  $\delta$  169.1, 157.0, 156.4, 155.0, 151.5, 150.0, 149.5, 145.8, 142.4, 140.3, 136.9, 131.9, 129.9, 128.4, 127.5, 126.6, 125.7, 125.2, 124.9, 124.6, 122.2, 117.7, 111.4, 109.1, 81.6, 73.3, 59.1, 57.2, 57.1, 50.2. ESI-HRMS(+)  $m/z$  calcd for C<sub>64</sub>H<sub>55</sub>Cl<sub>2</sub>N<sub>8</sub>O<sub>13</sub><sup>+</sup> [M+H]<sup>+</sup> 1213.3260, found 1213.3290.

**4',5'-Bis((bis(pyridin-2-ylmethyl)amino)methyl)-2',7'-dichloro-3',6'-bis((2-nitro-6-(trifluoromethyl)benzyl)oxy)-3H-spiro[isobenzofuran-1,9'-xanthen]-3-one (3)**

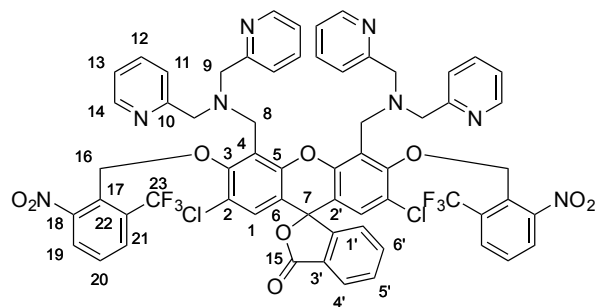

This compound was prepared by using **S7** (0.040 mmol) and 2-(bromomethyl)-1-nitro-3-(trifluoromethyl)benzene (0.40 mmol) according to the general procedure. The crude material was purified by preparative HPLC using solvent gradient 6 (Table S1) to afford a slightly yellow solid (27.7 mg, 56% yield). UV (CH<sub>3</sub>CN)  $\epsilon_{254} = 39,900 \text{ M}^{-1}\cdot\text{cm}^{-1}$ . <sup>1</sup>H NMR (400 MHz, CD<sub>3</sub>CN)

$\delta$  8.53 (d,  $J = 4.7$  Hz, 4H), 8.05 – 8.04 (m, 4H), 8.00 (d,  $J = 7.7$  Hz, 1H), 7.90 (td,  $J = 7.8, 1.5$  Hz, 4H), 7.87 (dd,  $J = 7.7, 1.0$  Hz, 1H), 7.80 (t,  $J = 8.1$  Hz, 2H), 7.77 (t,  $J = 7.6$  Hz, 1H), 7.45 (dd,  $J = 6.7, 6.0$  Hz, 4H), 7.32 (d,  $J = 7.9$  Hz, 4H), 7.16 (d,  $J = 7.7$  Hz, 1H), 6.59 (s, 2H), 5.45 (pseudo dd, AB system,  $J = 12.8$  Hz, 4H), 4.14 (s, 8H), 4.08 (pseudo dd, AB system,  $J = 14.0, 12.3$  Hz, 4H). <sup>13</sup>C NMR (101 MHz, CD<sub>3</sub>CN)  $\delta$  168.9, 157.3, 156.1, 152.5, 151.1, 149.8, 145.8, 142.4, 136.9, 132.0, 131.9, 131.3 (q, <sup>3</sup>J<sub>C-F</sub> = 5.7 Hz), 130.8 (q, <sup>2</sup>J<sub>C-F</sub> = 31.2 Hz), 129.9, 129.4 (C17 and C19), 127.6, 126.6, 125.3, 125.2, 124.8, 124.3 (q, <sup>1</sup>J<sub>C-F</sub> = 274.0 Hz), 123.9, 121.9, 117.7, 81.3, 69.1 (q,  $J_{\text{C-F, through space}} = 2.5$  Hz), 58.7, 50.20. <sup>19</sup>F NMR (376 MHz, CD<sub>3</sub>CN)  $\delta$  -58.9 (s, 6F). ESI-HRMS(+)  $m/z$  calcd for C<sub>62</sub>H<sub>45</sub>Cl<sub>2</sub>F<sub>6</sub>N<sub>8</sub>O<sub>9</sub><sup>+</sup> [M+H]<sup>+</sup> 1229.2585, found 1229.2595.

**4',5'-Bis((bis(pyridin-2-ylmethyl)amino)methyl)-2',7'-dichloro-3',6'-bis((3,4,5-trimethoxy-2-nitro-6-(trifluoromethyl)benzyl)oxy)-3H-spiro[isobenzofuran-1,9'-xanthen]-3-one (4)**

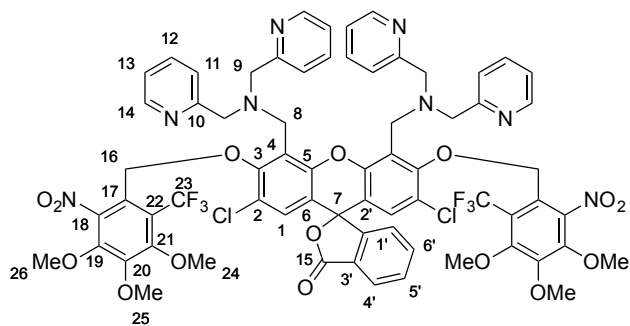

This compound was prepared by using **S7** (0.040 mmol) and 1-(bromomethyl)-3,4,5-trimethoxy-2-nitro-6-(trifluoromethyl)benzene (0.40 mmol) according to the general procedure. The reaction mixture was purified by preparative HPLC using solvent gradient 7 (Table S1) to obtain a slightly yellow solid (16.7 mg, 30% yield). UV (CH<sub>3</sub>CN)  $\epsilon_{254} =$

$22,200 \text{ M}^{-1}\cdot\text{cm}^{-1}$  and  $\epsilon_{300} = 3,570 \text{ M}^{-1}\cdot\text{cm}^{-1}$ . <sup>1</sup>H NMR (400 MHz, CD<sub>3</sub>CN)  $\delta$  8.53 (d,  $J = 4.9$  Hz, 4H), 8.00 (d,  $J = 7.7$  Hz, 1H), 7.91 (td,  $J = 7.7, 1.1$  Hz, 4H), 7.88 (t,  $J = 7.6$  Hz, 1H), 7.77 (t,  $J = 7.6$  Hz, 1H), 7.44 (pseudo t,  $J = 6.4$  Hz, 4H), 7.32 (d,  $J = 7.9$  Hz, 4H), 7.11 (d,  $J = 7.6$  Hz, 1H), 6.58 (s, 2H), 5.15 (pseudo dd, AB system,  $J = 13.1, 8.7$  Hz, 4H), 4.15 (s, 8H), 4.11 (pseudo dd,  $J = 12.1, 9.0$  Hz, 4H), 4.02 (s, 6H), 3.98 (s, 6H), 3.96 (s, 6H). <sup>13</sup>C NMR (101 MHz, CD<sub>3</sub>CN)  $\delta$  168.9, 157.5, 156.8 (q,  $^3J_{\text{C-F}} = 1.7$  Hz), 156.1, 151.2, 149.7, 149.4, 148.9, 145.8, 144.0, 142.3, 136.9, 131.9, 129.9, 127.5, 126.6, 125.1(5), 125.1(4), 124.7, 124.5 (q,  $^1J_{\text{C-F}} = 275.1$  Hz), 123.9, 123.5 (q,  $^3J_{\text{C-F}} = 1.3$  Hz), 121.8, 119.3 (q,  $^2J_{\text{C-F}} = 30.0$  Hz), 117.6, 81.3, 69.4 (q,  $J_{\text{C-F,through space}} = 5.7$  Hz), 63.4, 63.0 (q,  $J_{\text{C-F,through space}} = 0.7$  Hz), 62.1, 58.9, 50.4. <sup>19</sup>F NMR (376 MHz, CD<sub>3</sub>CN)  $\delta$  -55.3 (s, 6F). ESI-HRMS(+)  $m/z$  calcd for C<sub>68</sub>H<sub>57</sub>Cl<sub>2</sub>F<sub>6</sub>N<sub>8</sub>O<sub>15</sub><sup>+</sup> [M+H]<sup>+</sup> 1409.3219, found 1409.3254



**Table S1.** HPLC Solvent Gradients.

| Gradient | Time (min) | % Solvent B | Gradient | Time (min) | % Solvent B |
|----------|------------|-------------|----------|------------|-------------|
| 1        | 0          | 25          | 5        | 0          | 10          |
|          | 2.5        | 45          |          | 5          | 55          |
|          | 12.5       | 55          |          | 13         | 64          |
|          | 15         | 100         |          | 14         | 100         |
|          | 17         | 100         |          | 15         | 100         |
|          | 19         | 0           |          | 17         | 10          |
|          | 20         | 0           |          |            |             |
| 2        | 0          | 20          | 6        | 0          | 10          |
|          | 3          | 50          |          | 3          | 55          |
|          | 16         | 63          |          | 15         | 67          |
|          | 19         | 100         |          | 16         | 100         |
|          | 20         | 100         |          | 17         | 100         |
|          | 22         | 20          |          | 19         | 10          |
|          | 23         | 20          |          | 20         | 10          |
| 3        | 0          | 10          | 7        | 0          | 10          |
|          | 3          | 60          |          | 3          | 65          |
|          | 8          | 65          |          | 14         | 76          |
|          | 10         | 100         |          | 15         | 100         |
|          | 10.5       | 100         |          | 17         | 10          |
|          | 12         | 10          |          | 18         | 10          |
|          | 13         | 10          |          |            |             |
| 4        | 0          | 25          | 8        | 0          | 10          |
|          | 3          | 55          |          | 5          | 10          |
|          | 16         | 68          |          | 30         | 100         |
|          | 16.5       | 100         |          | 33         | 100         |
|          | 17.5       | 100         |          | 36         | 10          |
|          | 19.5       | 25          |          | 40         | 10          |
|          | 20.5       | 25          |          |            |             |

### *Spectroscopy.*

Concentrated stock solutions of each sensor were prepared in DMSO and stored as frozen aliquots at  $-80\text{ }^{\circ}\text{C}$ . Extinction coefficients were determined in  $\text{CH}_3\text{CN}$  by dissolving lyophilized samples of each sensor in known volumes of  $\text{CD}_3\text{CN}$  ( $\sim 700\text{ }\mu\text{L}$ ) and diluting a small aliquot of each solution ( $2.000\text{ }\mu\text{L}$ ) to  $2.000\text{ mL}$  with  $\text{CH}_3\text{CN}$ . Absorption spectra of the dilute solutions were recorded at  $25\text{ }^{\circ}\text{C}$ . For compounds **1-3**, a known amount of DMF ( $\sim 4\text{ }\mu\text{L}$ ) was added to each of the  $\text{CD}_3\text{CN}$  stock solutions. For compound **4**, an aliquot ( $25\text{ }\mu\text{L}$ ) of a stock solution of known concentration of  $\text{CH}_2\text{Cl}_2$  in  $\text{CD}_3\text{CN}$  ( $\sim 180\text{ mM}$ ) was added to the sample.  $^1\text{H}$  NMR spectra were collected with  $30\text{ s}$  relaxation delay times.<sup>6</sup> The concentration of each sensor stock solution was determined by integrating  $^1\text{H}$  NMR peaks of the sensor and comparing them to those arising from the DMF or  $\text{CH}_2\text{Cl}_2$  standard. These data were used to calculate the following extinction coefficients: for compound **1**,  $\epsilon_{254} = 45,500\text{ M}^{-1}\cdot\text{cm}^{-1}$ ; for compound **2**,  $\epsilon_{254} = 55,300\text{ M}^{-1}\cdot\text{cm}^{-1}$  and  $\epsilon_{300} = 14,700\text{ M}^{-1}\cdot\text{cm}^{-1}$ ; for compound **3**,  $\epsilon_{254} = 39,900\text{ M}^{-1}\cdot\text{cm}^{-1}$ ; for compound **4**,  $\epsilon_{254} = 22,200\text{ M}^{-1}\cdot\text{cm}^{-1}$  and  $\epsilon_{300} = 3,570\text{ M}^{-1}\cdot\text{cm}^{-1}$ . For cuvette studies, sensors were irradiated with a  $4\text{ W}$   $254\text{ nm}$  compact light source (UVP; UVGL-25 p/n 95-0021-12) or a custom-made  $380\text{ nm}$  light source consisting of nine  $5\text{ mm}$   $20\text{ mW}$  LED bulbs (Super Bright LEDs, Inc.; p/n RL5-UV0230-380). Both light sources were mounted above a stir plate at a distance of  $\sim 5\text{ cm}$  away from the cuvette.

Photocleavage of each of the protected sensors was evaluated by comparing absorption and fluorescence spectra of each molecule before and after irradiation with  $254$  or  $380\text{ nm}$  light in the presence and absence of  $\text{ZnCl}_2$ , as well as by collecting analytical HPLC traces at each time point. For all experiments, the buffer was  $50\text{ mM}$  PIPES,  $100\text{ mM}$  KCl, pH  $7.0$ . A typical sample consisted of buffer ( $200\text{ }\mu\text{L}$ ), water ( $1200\text{ }\mu\text{L}$ ), acetonitrile ( $600\text{ }\mu\text{L}$ ), and sensor ( $1.0\text{ }\mu\text{L}$ , final conc.  $3\text{ }\mu\text{M}$ ). Samples were stirred for  $\sim 1\text{ min}$ . The fluorescence emission spectrum of each sample was recorded from  $500 - 650\text{ nm}$ , with an excitation wavelength of  $490\text{ nm}$ . Background-corrected absorption spectra were also collected at a scan rate of  $600\text{ nm/min}$ . An aliquot ( $50\text{ }\mu\text{L}$ ) of each sample was removed for analytical HPLC analysis using solvent gradient 8 (Table S1). Samples were irradiated at either  $254\text{ nm}$  or  $360\text{ nm}$  for an interval of  $15\text{ s}$ . Fluorescence and absorption spectra were collected and another aliquot ( $50\text{ }\mu\text{L}$ ) was removed for HPLC analysis. This procedure was repeated until  $90\text{ s}$  of total irradiation time was reached, at which point the irradiation interval was increased to  $30\text{ s}$  and then  $60\text{ s}$ . The experiment was stopped after  $180$  or  $240\text{ s}$  of total irradiation time. Samples were irradiated in either the absence or presence of  $\text{ZnCl}_2$  ( $10\text{ }\mu\text{M}$  final conc.). For the samples irradiated in the absence of  $\text{ZnCl}_2$ , a small amount of  $\text{ZnCl}_2$  ( $\sim 1\text{ }\mu\text{L}$ ) was added to give a final concentration of  $10\text{ }\mu\text{M}$  after the final irradiation period. Fluorescence and absorption spectra were then obtained. After all of the spectroscopic data had been collected, tris(2-pyridylmethyl)amine (TPA;  $20\text{ }\mu\text{M}$  final conc.) was added to every sample. Each sample was stirred for  $10\text{ min}$ , after which time fluorescence and absorption spectra were recorded. For all measurements, the step size was  $1\text{ nm}$ . The integration time was  $0.5\text{ s}$ . The slit width was  $2\text{ nm}$ . The temperature was  $298\text{ K}$ . In the course of

the irradiation experiment, mono-protected intermediates were observed during HPLC analysis of the irradiated samples. Although we were unable to collect a sufficient amount of material for NMR spectroscopic characterization, the mono-protected compounds do not absorb at 520 nm, which suggests that they exist in non-fluorescent lactone forms.

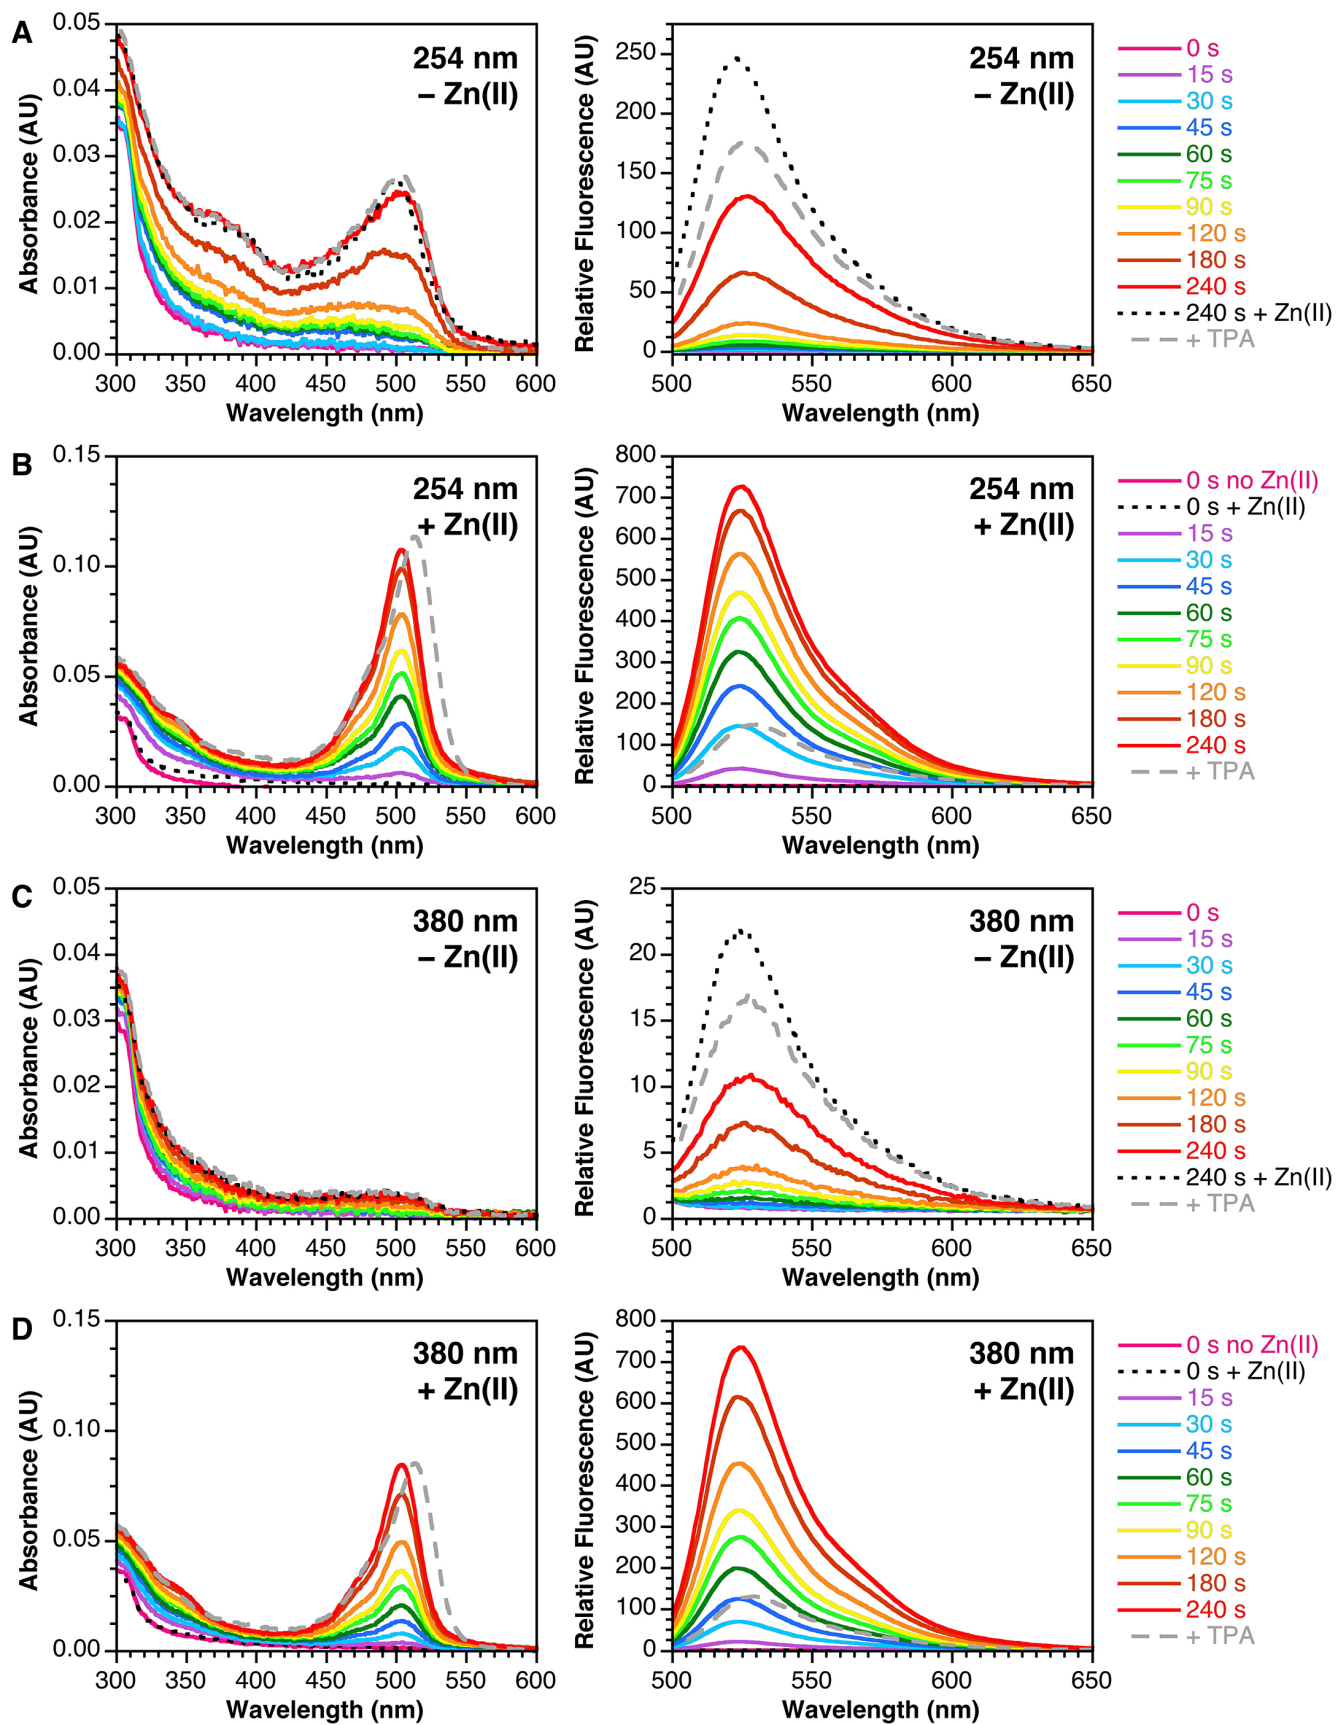

**Figure S1.** Absorption (left) and fluorescence (right) spectra of **1** after irradiation with 254 nm (A,B) or 380 nm (C,D) light for varying intervals of time in the absence (A,C) and presence (B,D) of  $\text{ZnCl}_2$ , as indicated.

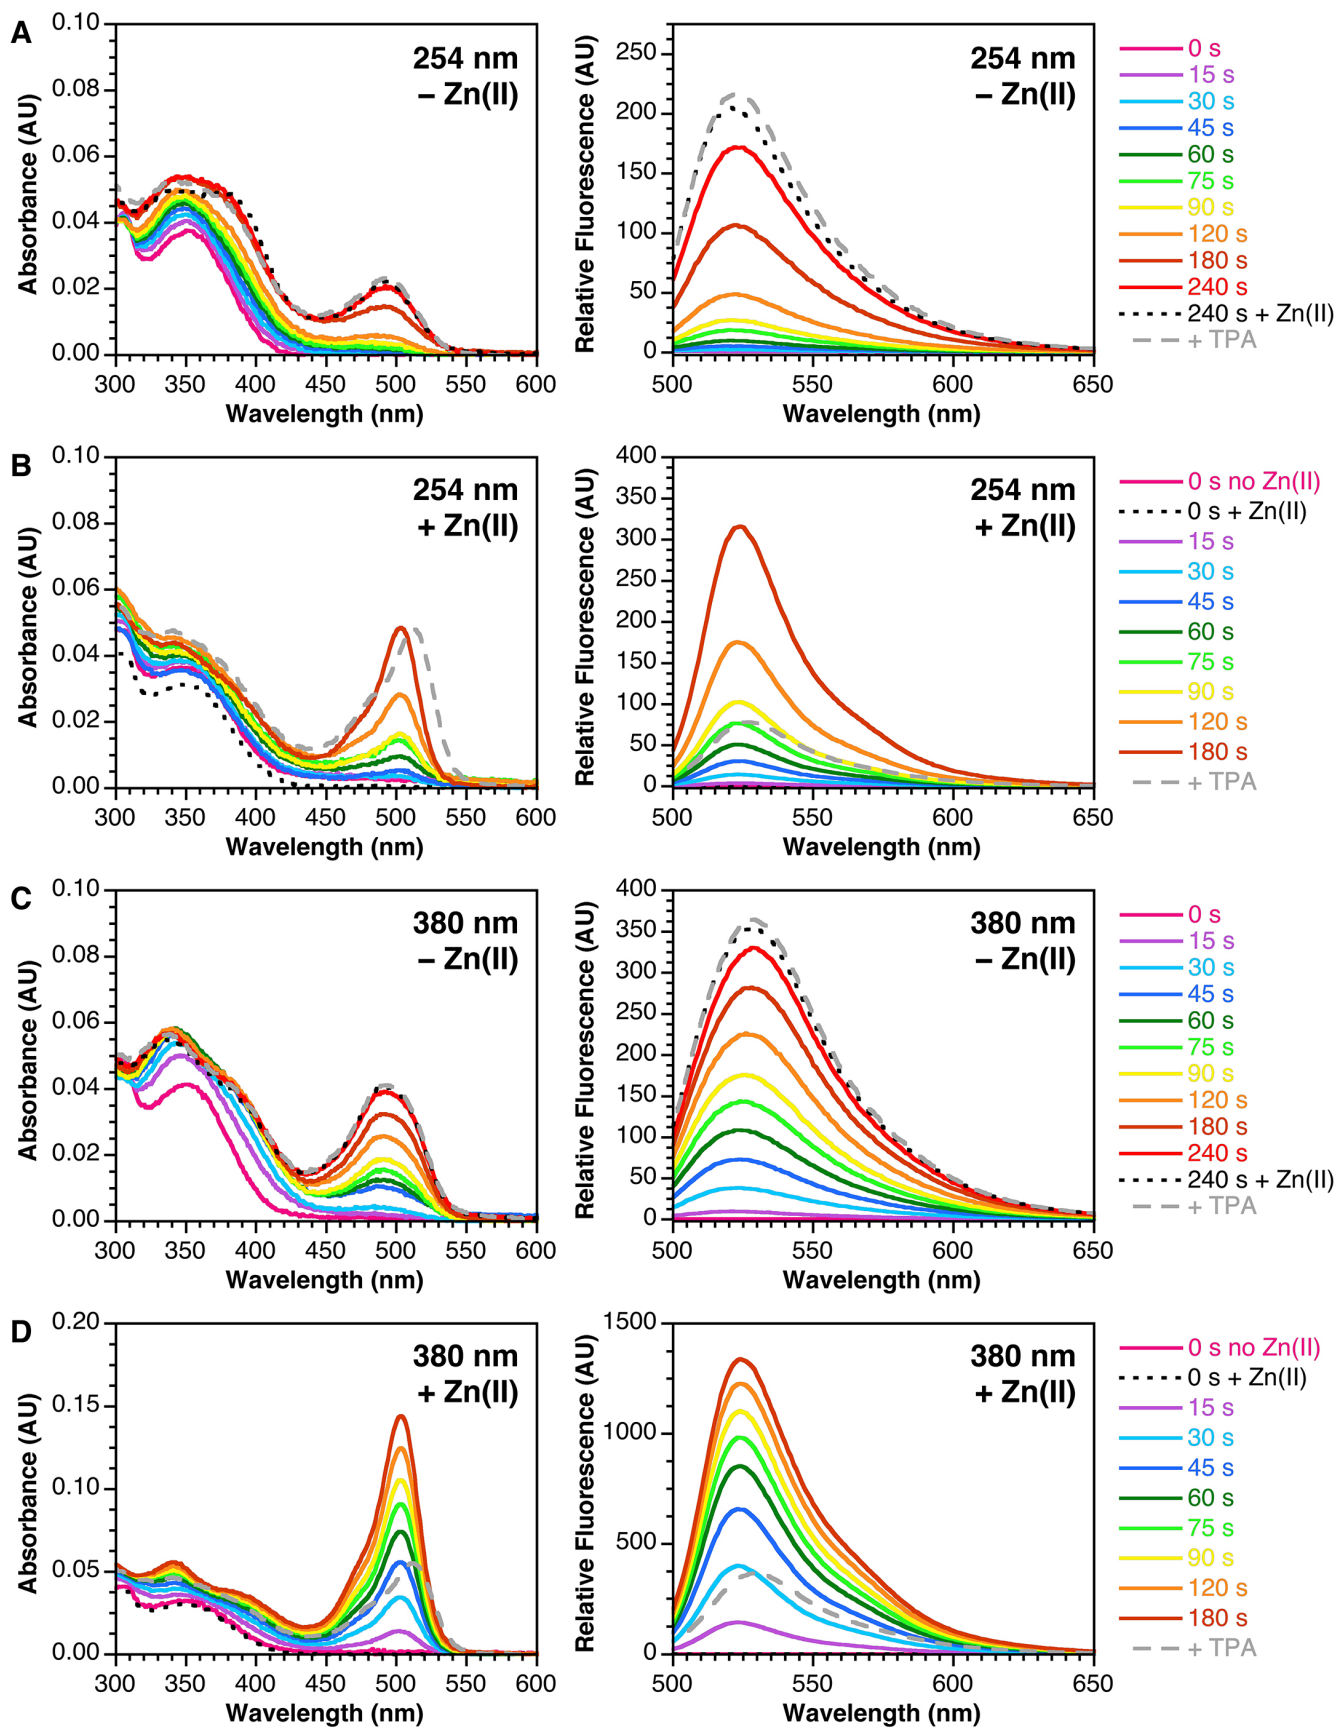

**Figure S2.** Absorption (left) and fluorescence (right) spectra of **2** after irradiation with 254 nm (A,B) or 380 nm (C,D) light for varying intervals of time in the absence (A,C) and presence (B,D) of ZnCl<sub>2</sub>, as indicated.

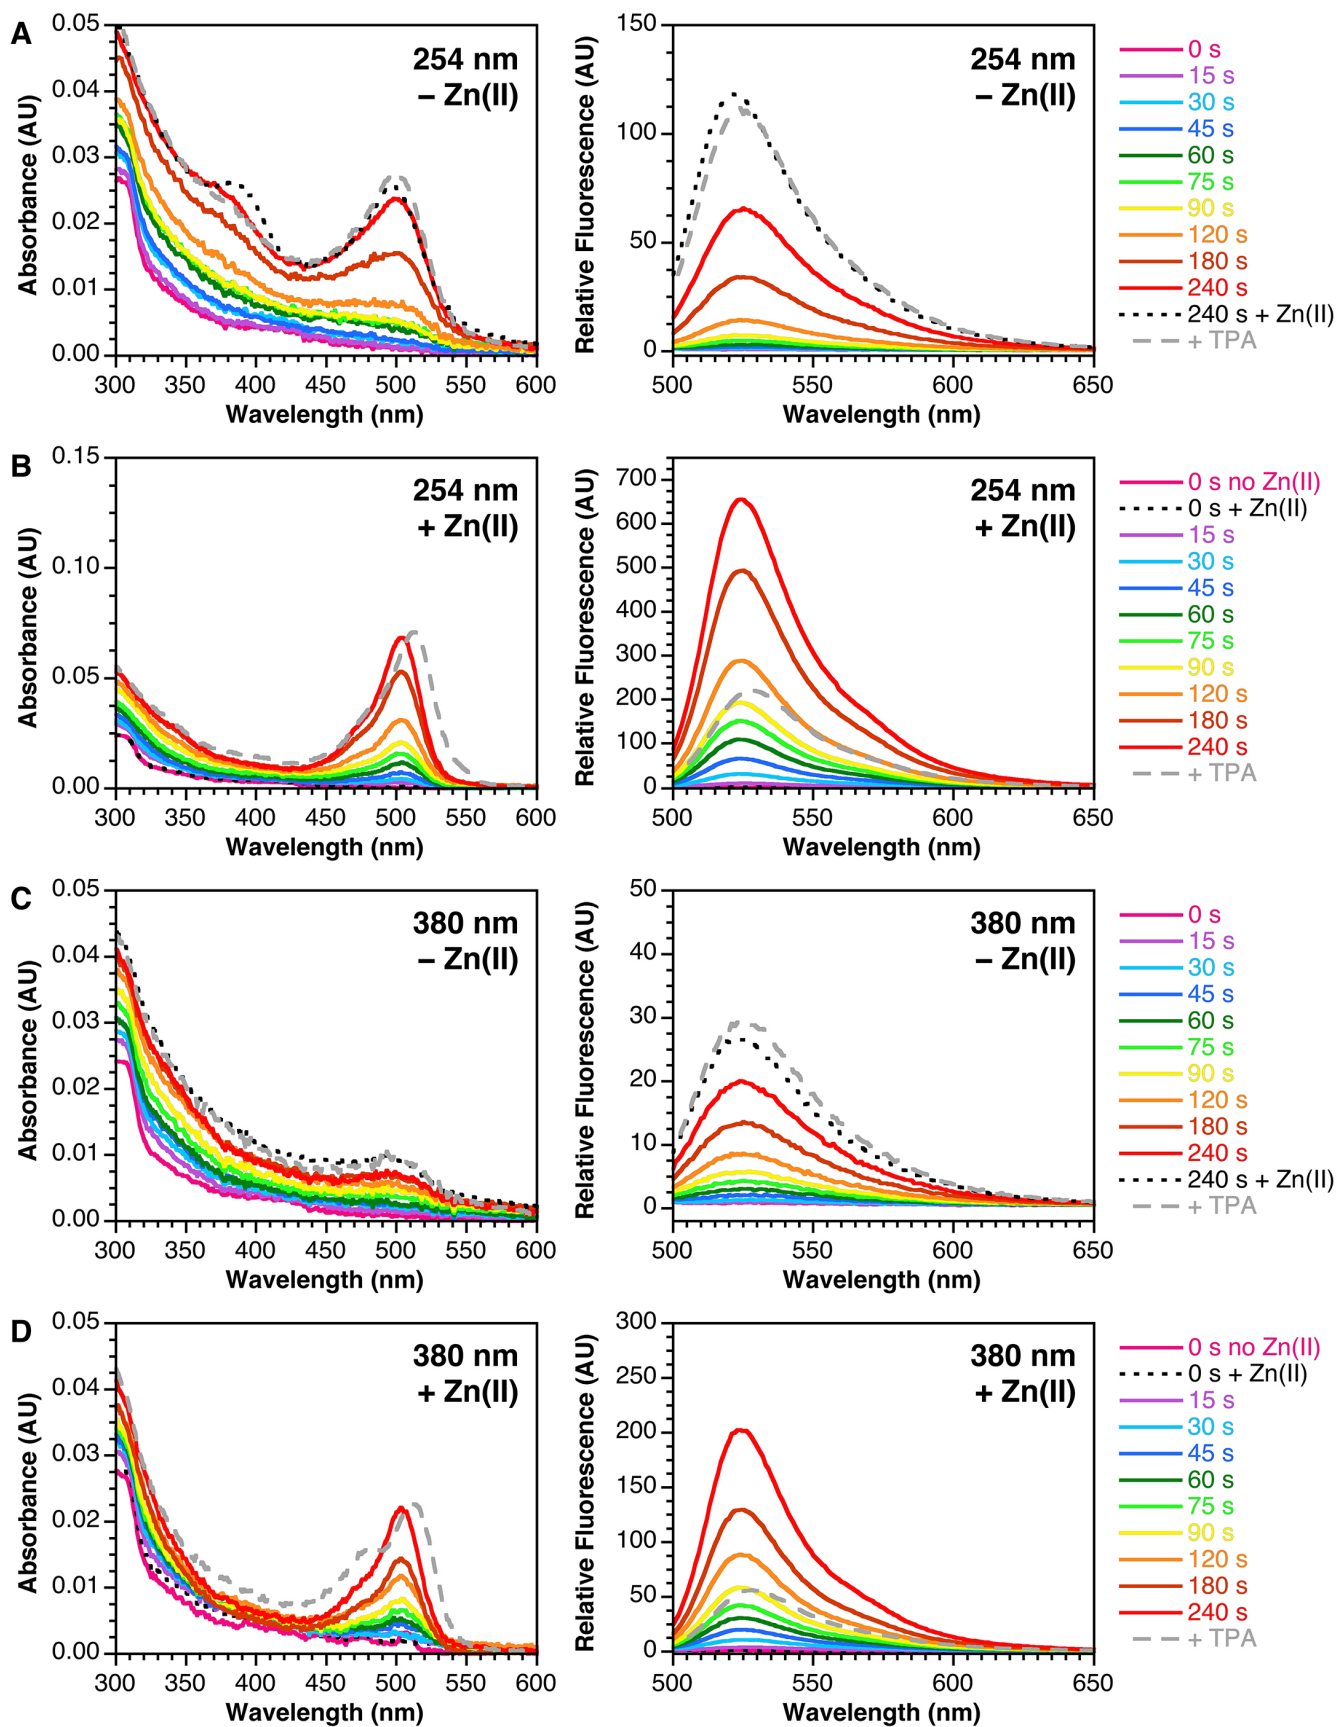

**Figure S3.** Absorption (left) and fluorescence (right) spectra of **3** after irradiation with 254 nm (A,B) or 380 nm (C,D) light for varying intervals of time in the absence (A,C) and presence (B,D) of ZnCl<sub>2</sub>, as indicated.

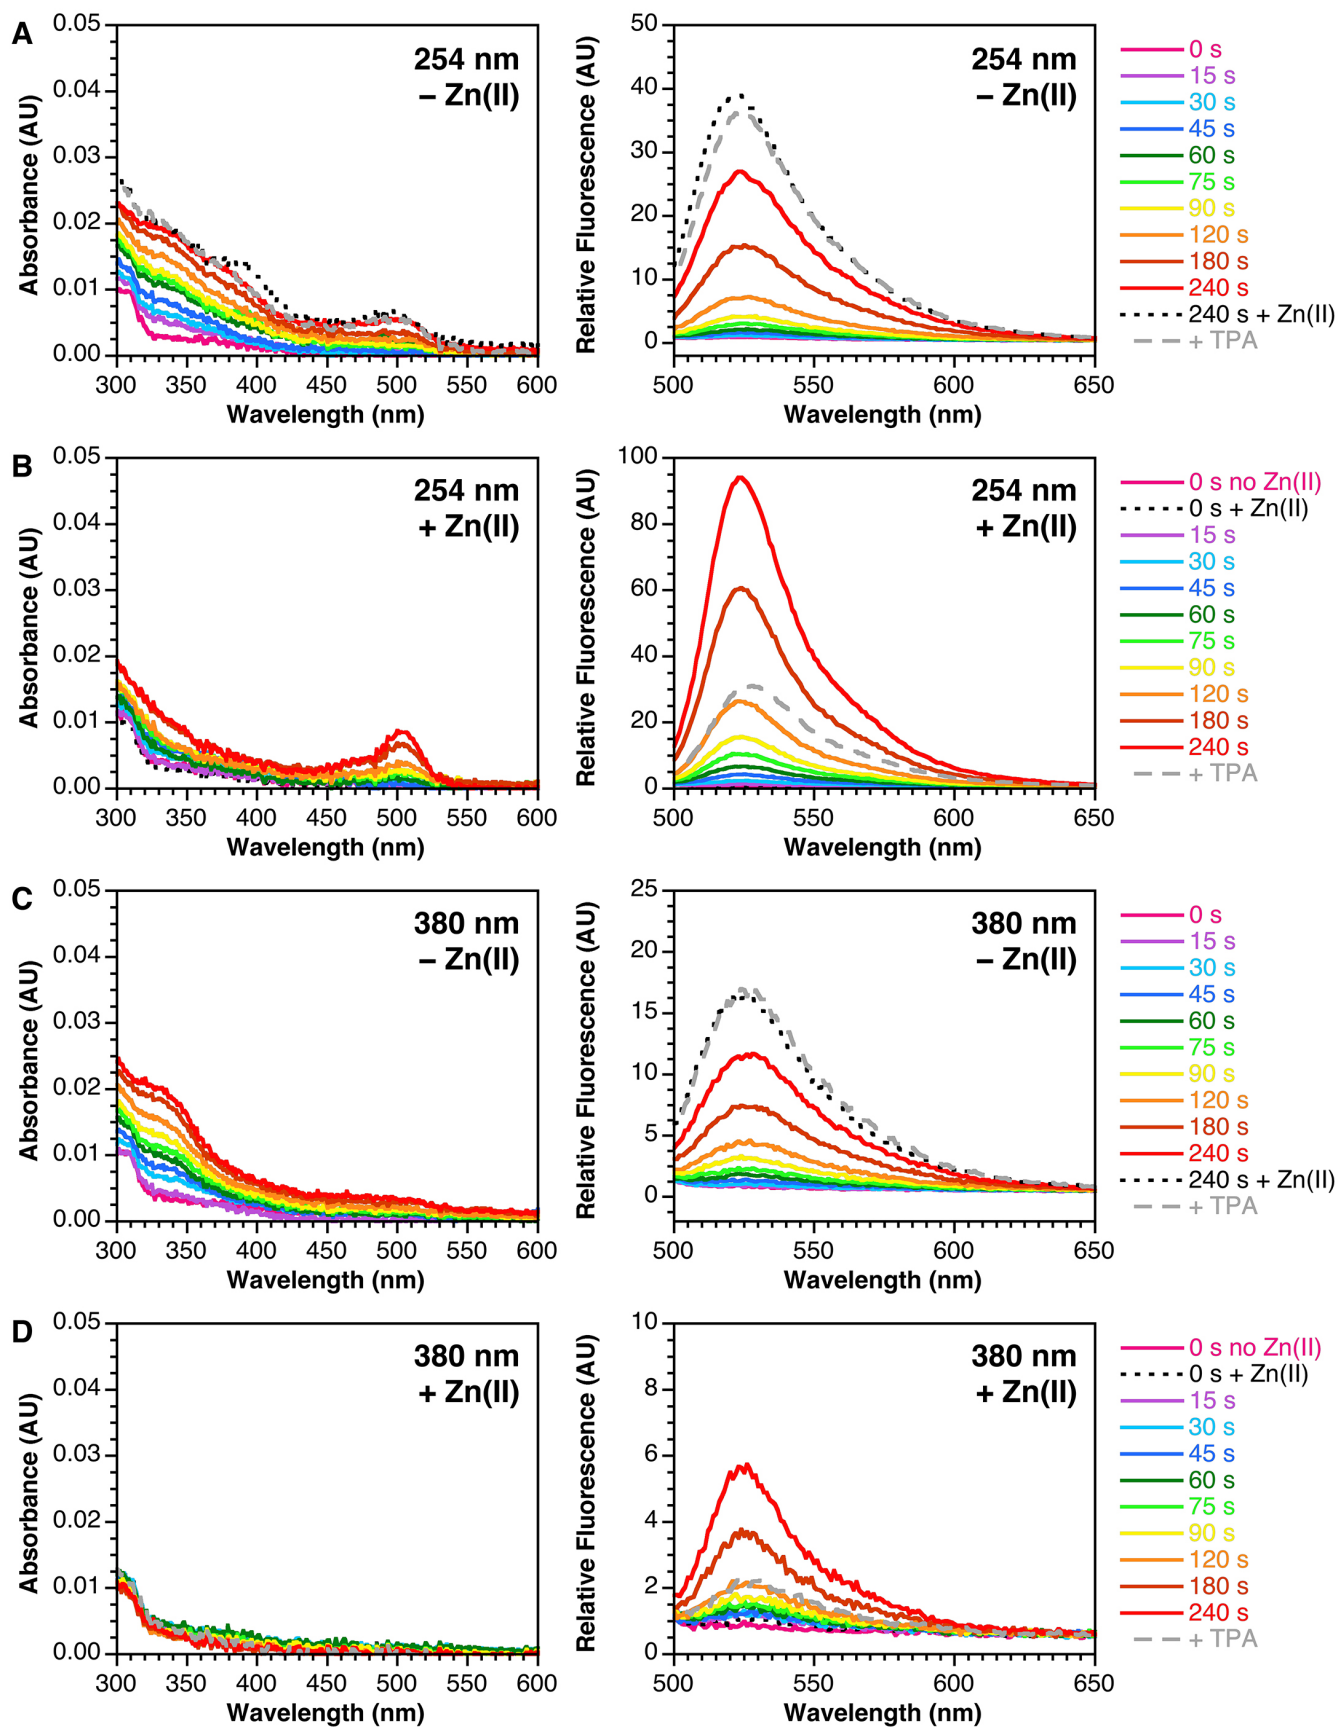

**Figure S4.** Absorption (left) and fluorescence (right) spectra of **4** after irradiation with 254 nm (A,B) or 380 nm (C,D) light for varying intervals of time in the absence (A,C) and presence (B,D) of ZnCl<sub>2</sub>, as indicated.

**Table S2.** Integrated relative fluorescence turn-on after intervals of irradiation of sensors **1-4** in the absence of ZnCl<sub>2</sub>. The corresponding emission spectra are shown in panels A and C (right) in Figures S1-S4.

|          | 254 nm |     |     |     | 380 nm |     |     |     |
|----------|--------|-----|-----|-----|--------|-----|-----|-----|
|          | 1      | 2   | 3   | 4   | 1      | 2   | 3   | 4   |
| 0 s      | 1.0    | 1.0 | 1.0 | 1.0 | 1.0    | 1.0 | 1.0 | 1.0 |
| 15 s     | 1.1    | 1.1 | 1.1 | 1.1 | 1.0    | 5.1 | 1.1 | 1.0 |
| 30 s     | 1.4    | 1.7 | 1.2 | 1.2 | 1.0    | 18  | 1.2 | 1.1 |
| 45 s     | 2.1    | 3.0 | 1.5 | 1.4 | 1.2    | 34  | 1.7 | 1.2 |
| 60 s     | 3.2    | 4.9 | 2.1 | 1.7 | 1.3    | 51  | 2.2 | 1.5 |
| 75 s     | 4.6    | 8.8 | 3.1 | 2.1 | 1.6    | 68  | 2.8 | 1.7 |
| 90 s     | 6.7    | 12  | 4.3 | 2.8 | 1.9    | 84  | 3.6 | 2.1 |
| 120 s    | 11     | 22  | 7.3 | 4.4 | 2.4    | 109 | 4.9 | 2.8 |
| 180 s    | 29     | 48  | 17  | 8.7 | 3.9    | 137 | 7.5 | 4.3 |
| 240 s    | 58     | 79  | 31  | 15  | 5.6    | 160 | 11  | 6.3 |
| + Zn(II) | 103    | 92  | 54  | 21  | 9.8    | 173 | 14  | 8.5 |
| + TPA    | 79     | 99  | 52  | 20  | 8.2    | 177 | 16  | 8.9 |

**Table S3.** Integrated relative fluorescence turn-on after intervals of irradiation of sensors **1-4** in the presence of ZnCl<sub>2</sub>. The corresponding emission spectra are shown in panels B and D (right) in Figures S1-S4.

|              | 254 nm |     |     |     | 380 nm |     |     |     |
|--------------|--------|-----|-----|-----|--------|-----|-----|-----|
|              | 1      | 2   | 3   | 4   | 1      | 2   | 3   | 4   |
| initial      | 1.0    | 1.0 | 1.0 | 1.0 | 1.0    | 1.0 | 1.0 | 1.0 |
| 0 s + Zn(II) | 1.0    | 1.0 | 1.2 | 1.1 | 0.8    | 1.1 | 1.1 | 1.1 |
| 15 s         | 16     | 3.1 | 4.9 | 1.2 | 7.8    | 54  | 2.3 | 1.2 |
| 30 s         | 55     | 9.5 | 14  | 1.6 | 24     | 152 | 5.2 | 1.2 |
| 45 s         | 92     | 19  | 28  | 2.3 | 44     | 256 | 8.6 | 1.2 |
| 60 s         | 124    | 31  | 45  | 3.3 | 70     | 337 | 13  | 1.3 |
| 75 s         | 157    | 46  | 63  | 4.7 | 96     | 394 | 17  | 1.3 |
| 90 s         | 182    | 62  | 80  | 6.6 | 120    | 446 | 23  | 1.4 |
| 120 s        | 223    | 106 | 120 | 11  | 162    | 505 | 35  | 1.5 |
| 180 s        | 269    | 193 | 208 | 24  | 224    | 560 | 50  | 2.1 |
| 240 s        | 295    | -   | 280 | 36  | 271    | -   | 78  | 2.9 |
| + TPA        | 65     | 53  | 101 | 14  | 52     | 165 | 24  | 1.6 |



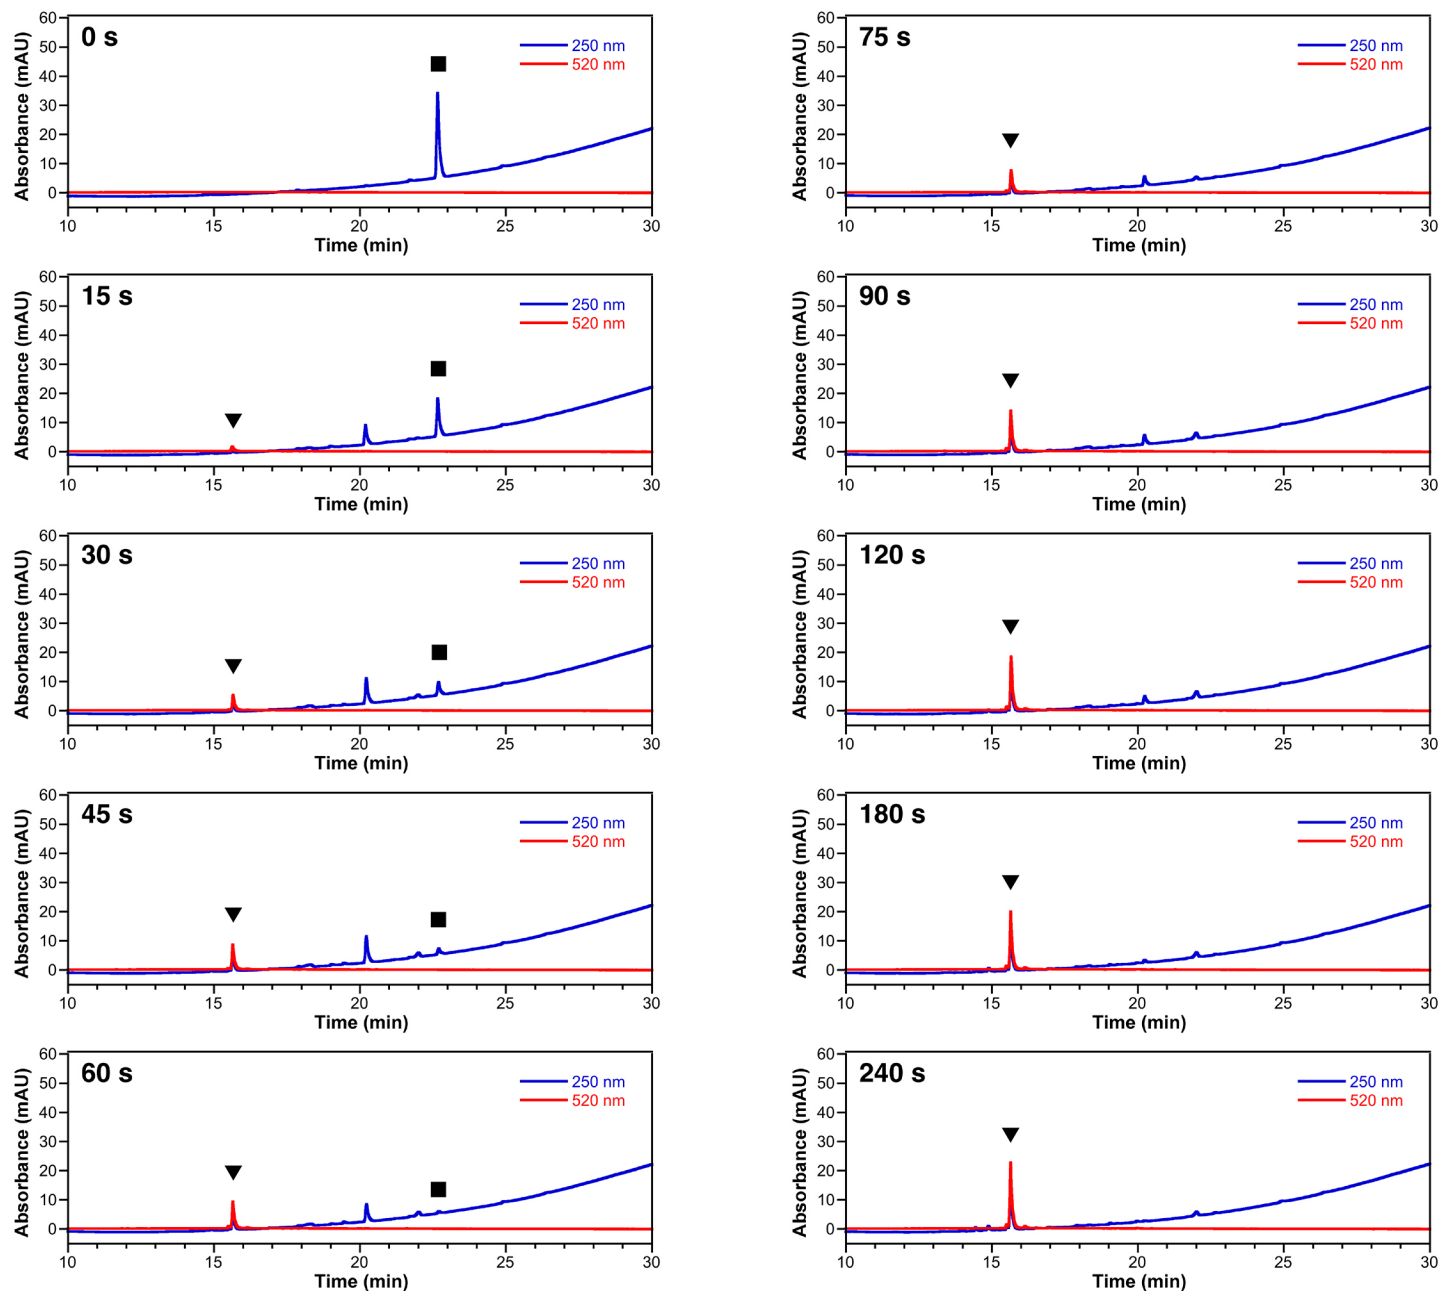

**Figure S5.** HPLC chromatograms of **1** after irradiation with 254 nm light for varying intervals of time, as indicated, in the presence of 10  $\mu\text{M}$   $\text{ZnCl}_2$ . Absorbance monitored at 250 nm (blue) and 520 nm (red). Peaks corresponding to **1** and ZP1 are identified with squares and triangles, respectively. Solvent gradients are given in text.

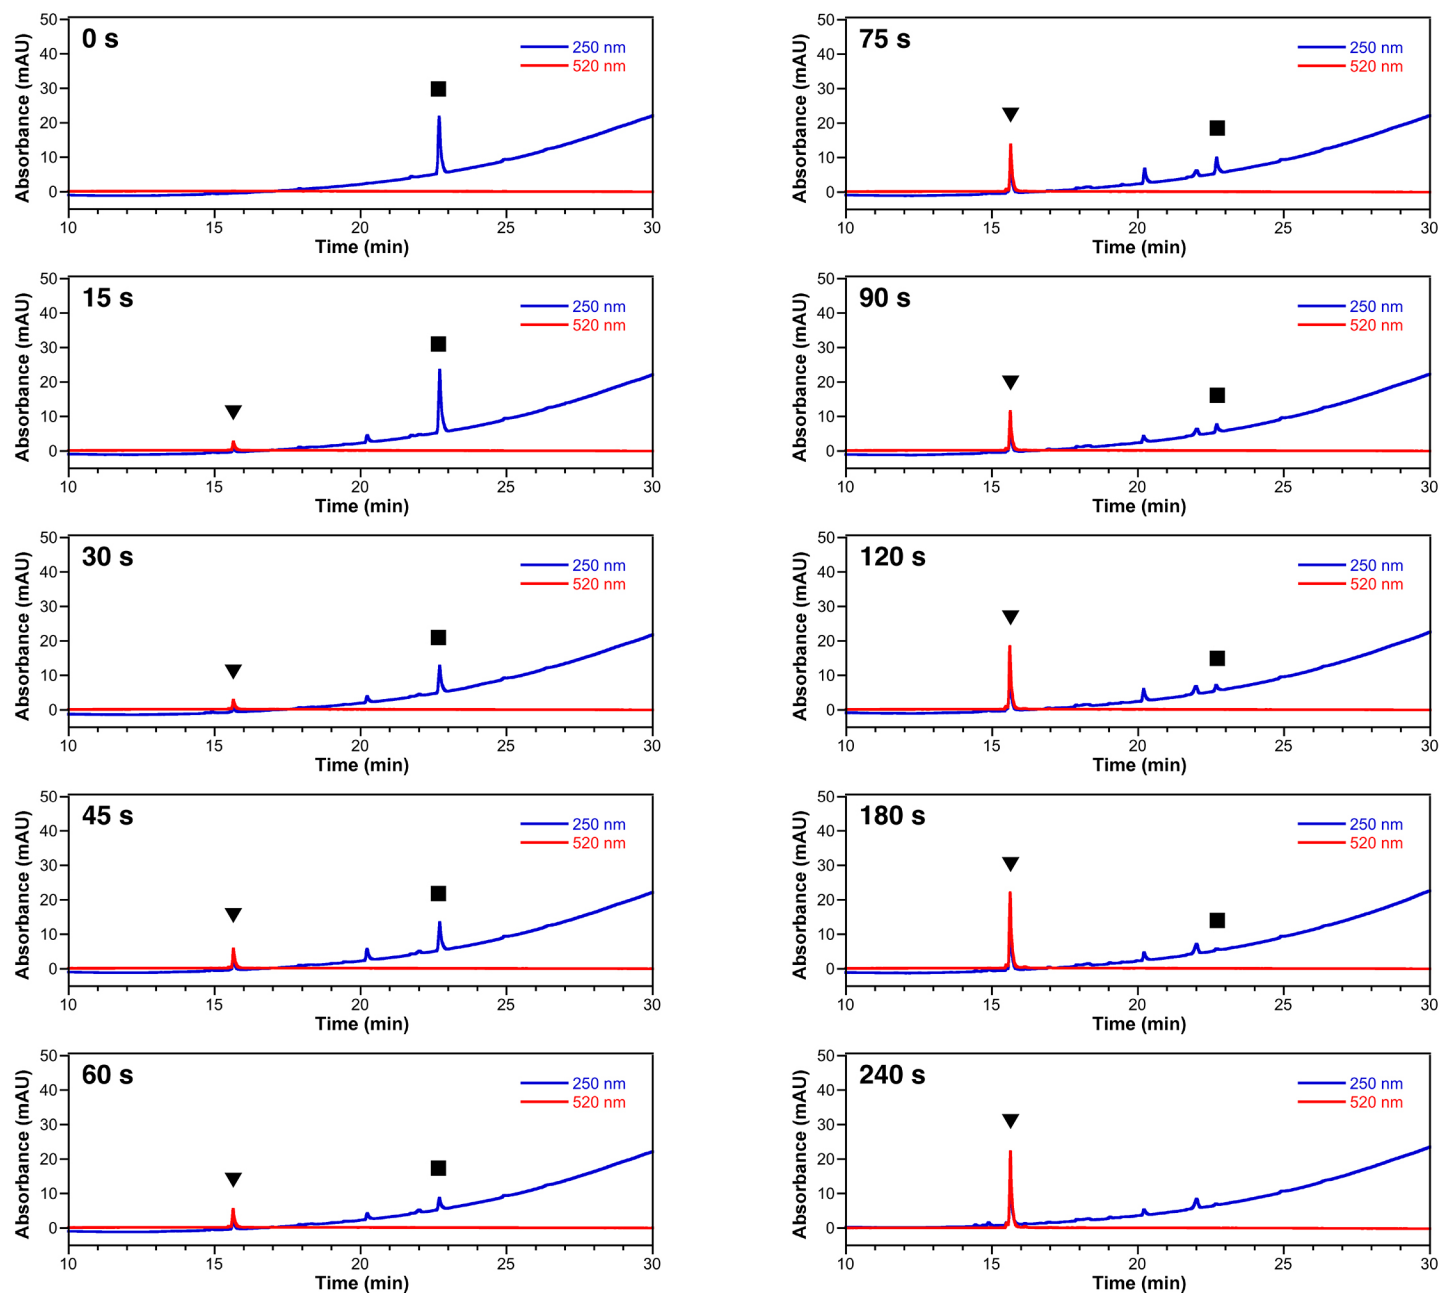

**Figure S6.** HPLC chromatograms of **1** after irradiation with 380 nm light for varying intervals of time, as indicated, in the presence of 10  $\mu\text{M}$   $\text{ZnCl}_2$ . Absorbance monitored at 250 nm (blue) and 520 nm (red). Peaks corresponding to **1** and ZP1 are identified with squares and triangles, respectively. Solvent gradients are given in text.

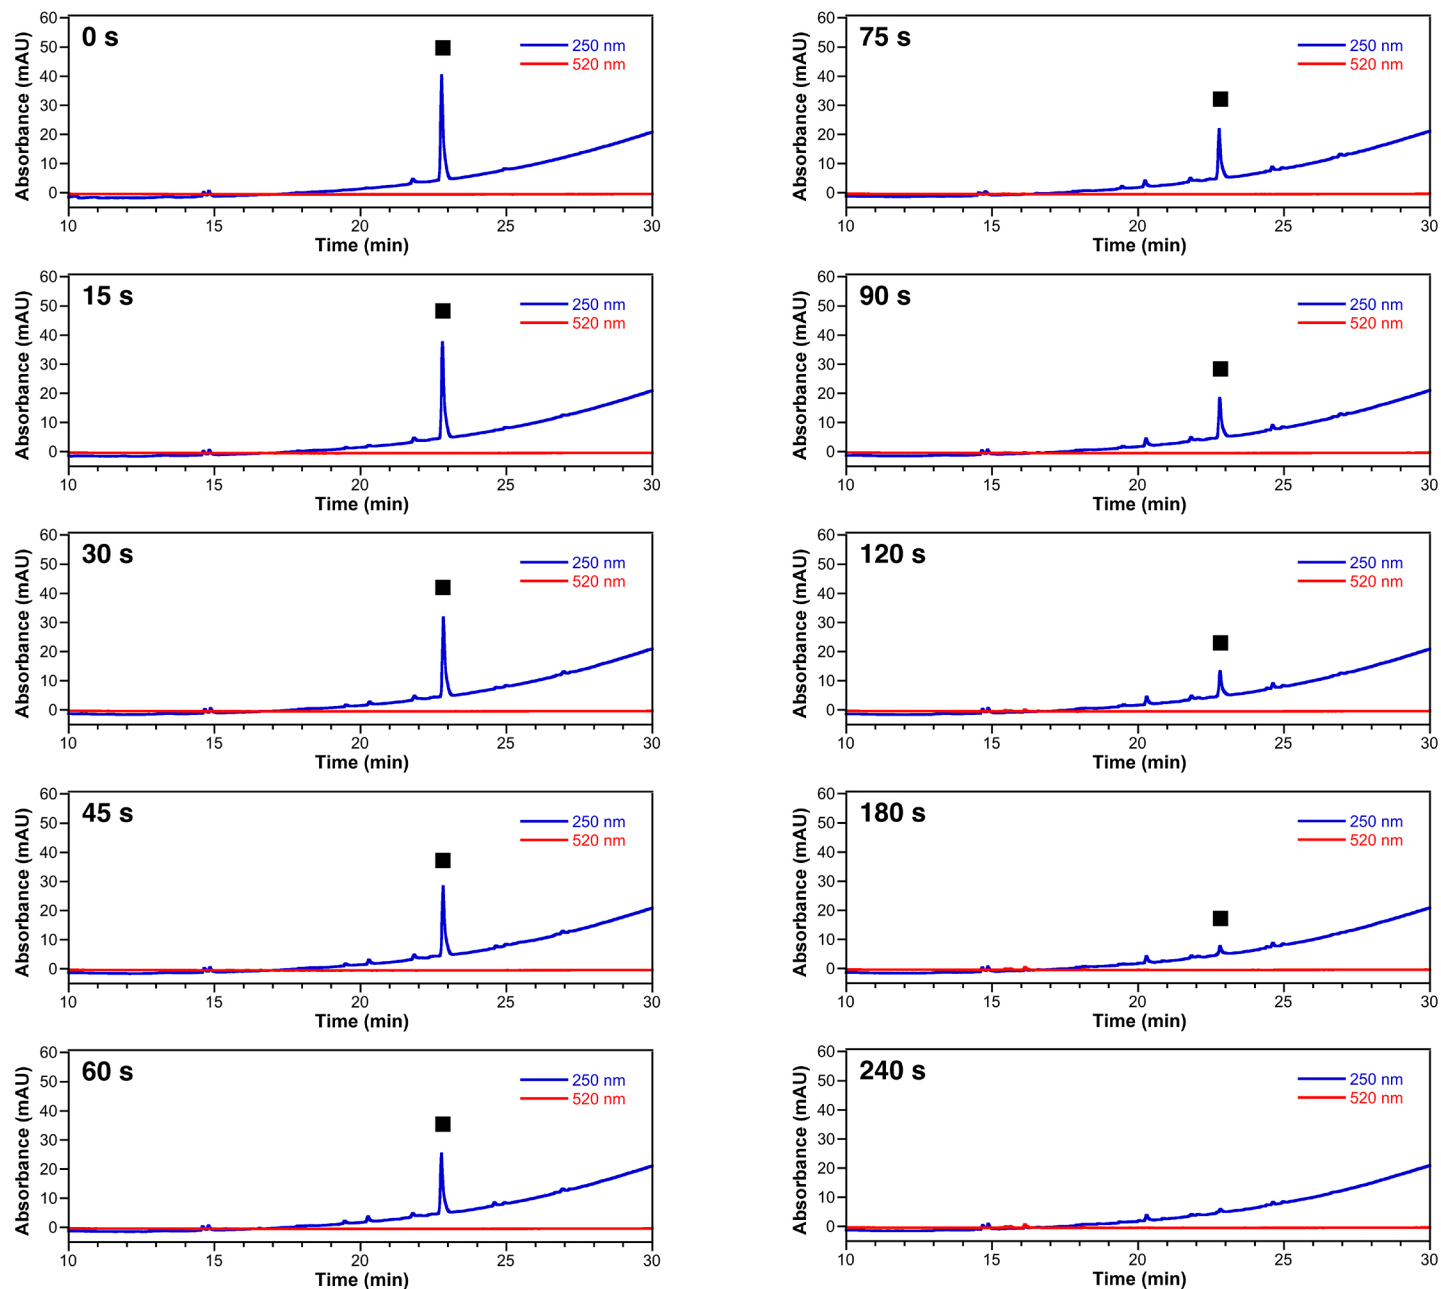

**Figure S7.** HPLC chromatograms of **1** after irradiation with 254 nm light for varying intervals of time, as indicated. Absorbance monitored at 250 nm (blue) and 520 nm (red). Peaks corresponding to **1** are identified with squares. Solvent gradients are given in text.

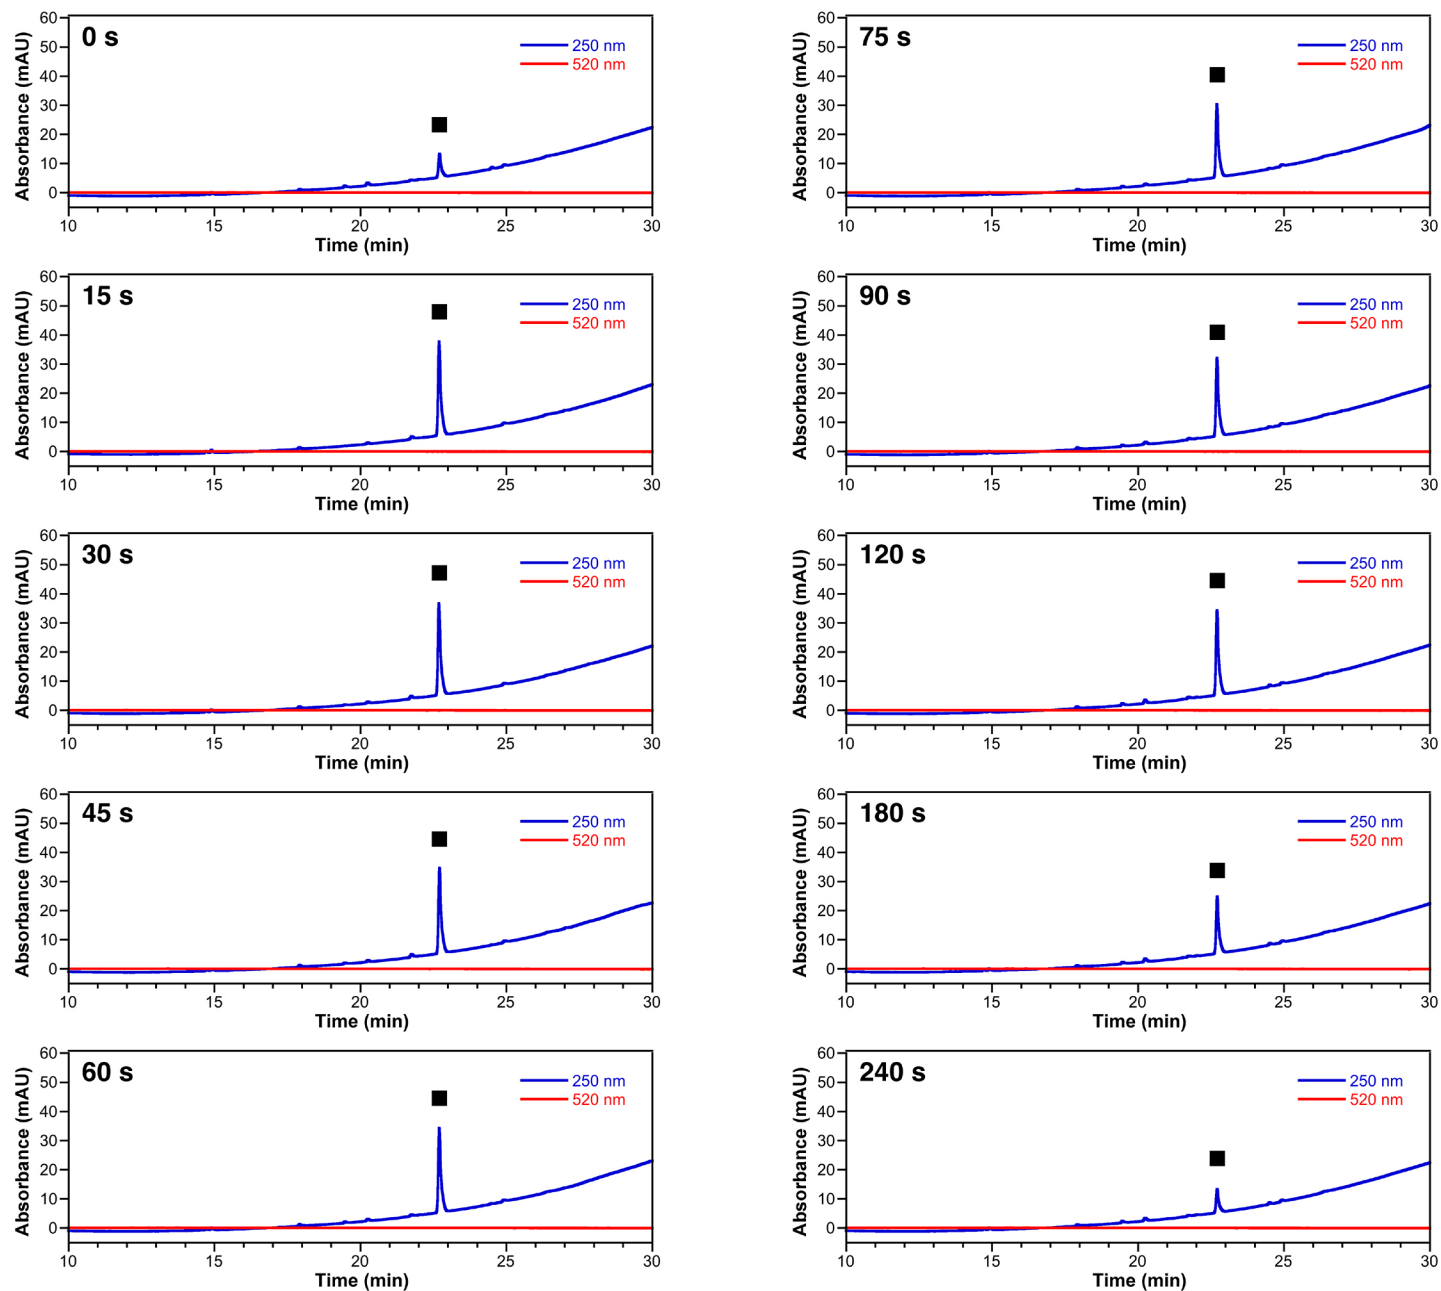

**Figure S8.** HPLC chromatograms of **1** after irradiation with 380 nm light for varying intervals of time, as indicated. Absorbance monitored at 250 nm (blue) and 520 nm (red). Peaks corresponding to **1** are identified with squares. Solvent gradients are given in text.

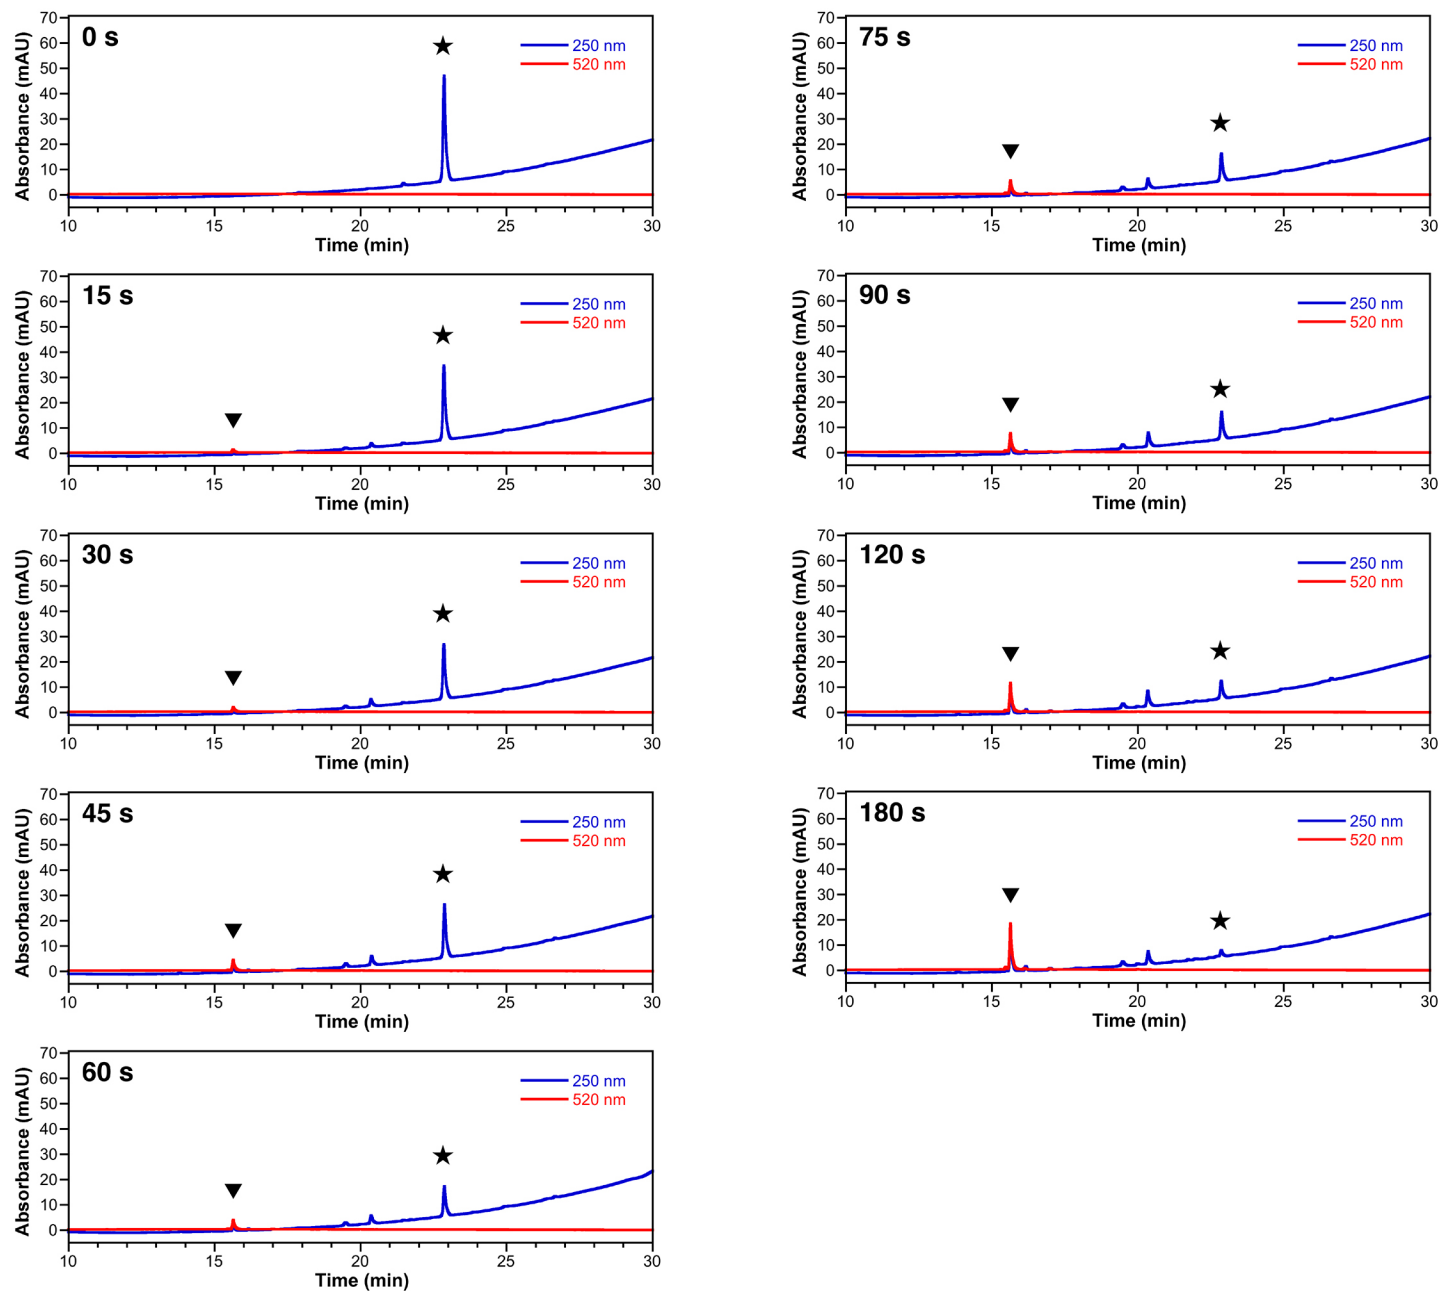

**Figure S9.** HPLC chromatograms of **2** after irradiation with 254 nm light for varying intervals of time, as indicated, in the presence of 10  $\mu\text{M}$   $\text{ZnCl}_2$ . Absorbance monitored at 250 nm (blue) and 520 nm (red). Peaks corresponding to **2** and ZP1 are identified with stars and triangles, respectively. Solvent gradients are given in text.

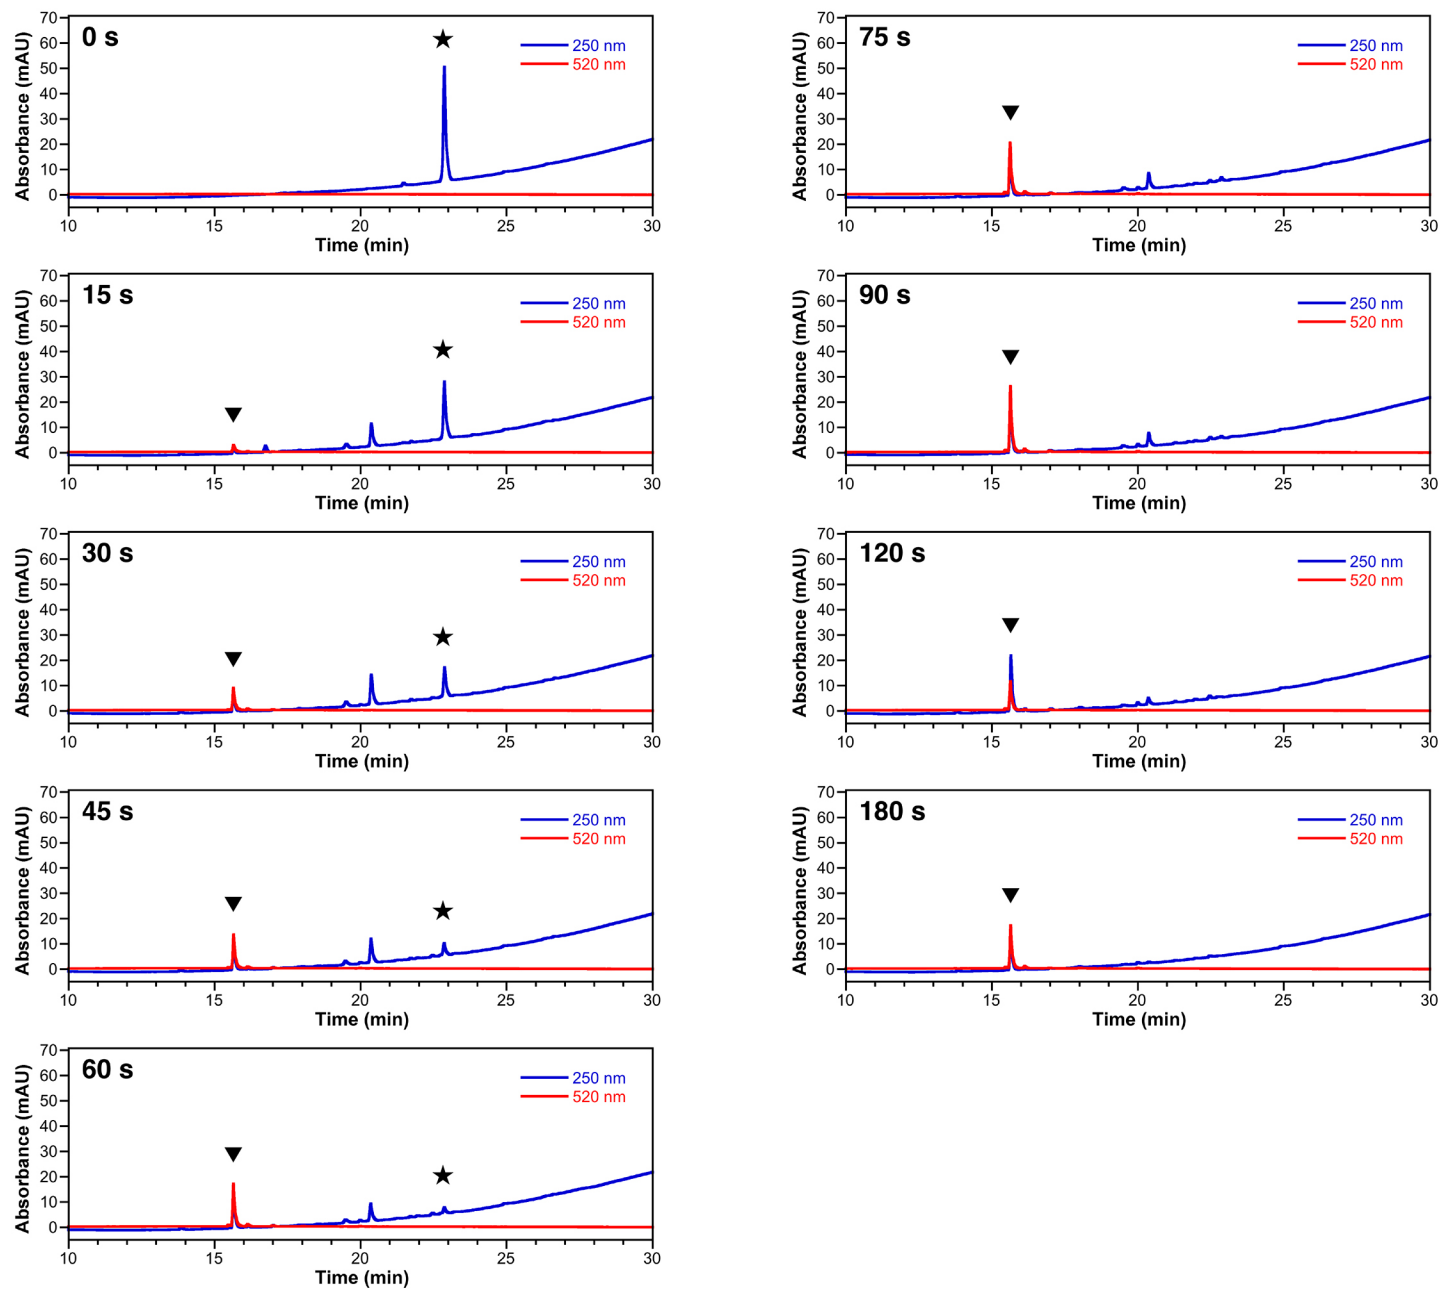

**Figure S10.** HPLC chromatograms of **2** after irradiation with 380 nm light for varying intervals of time, as indicated, in the presence of 10  $\mu\text{M}$   $\text{ZnCl}_2$ . Absorbance monitored at 250 nm (blue) and 520 nm (red). Peaks corresponding to **2** and ZP1 are identified with stars and triangles, respectively. Solvent gradients are given in text.

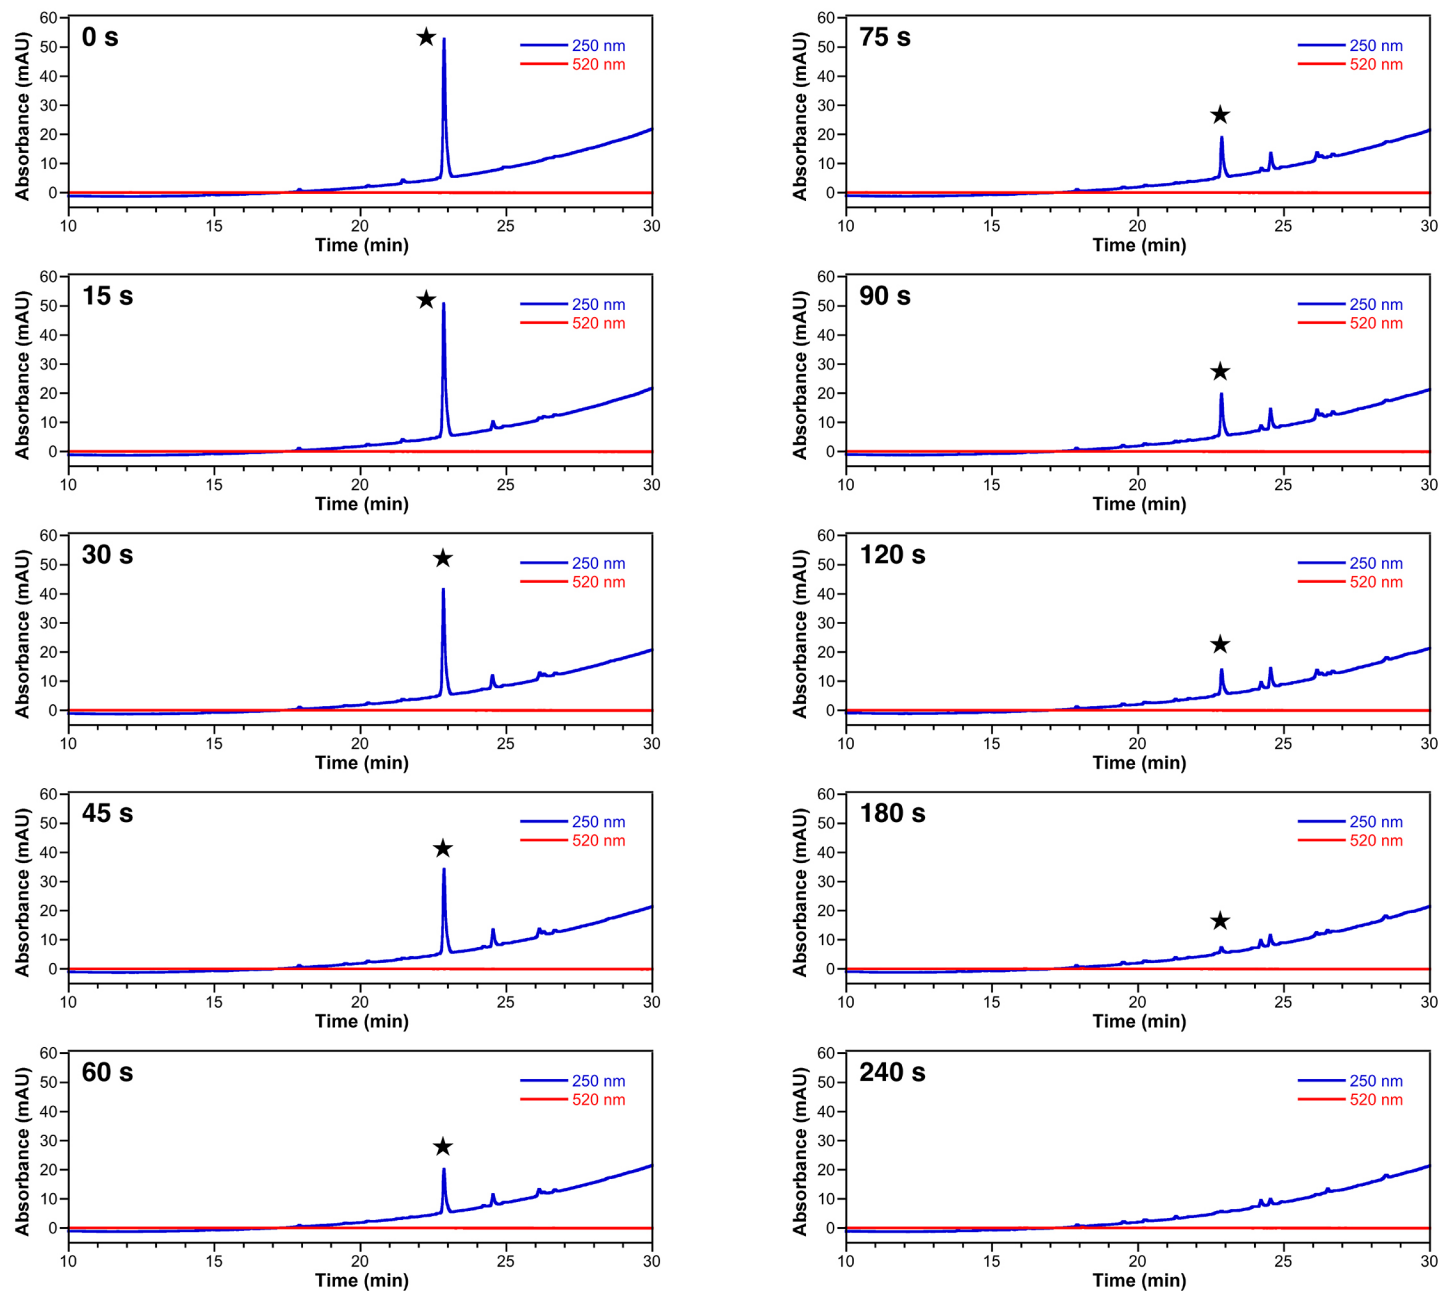

**Figure S11.** HPLC chromatograms of **2** after irradiation with 254 nm light for varying intervals of time, as indicated. Absorbance monitored at 250 nm (blue) and 520 nm (red). Peaks corresponding to **2** are identified with stars. Solvent gradients are given in text.

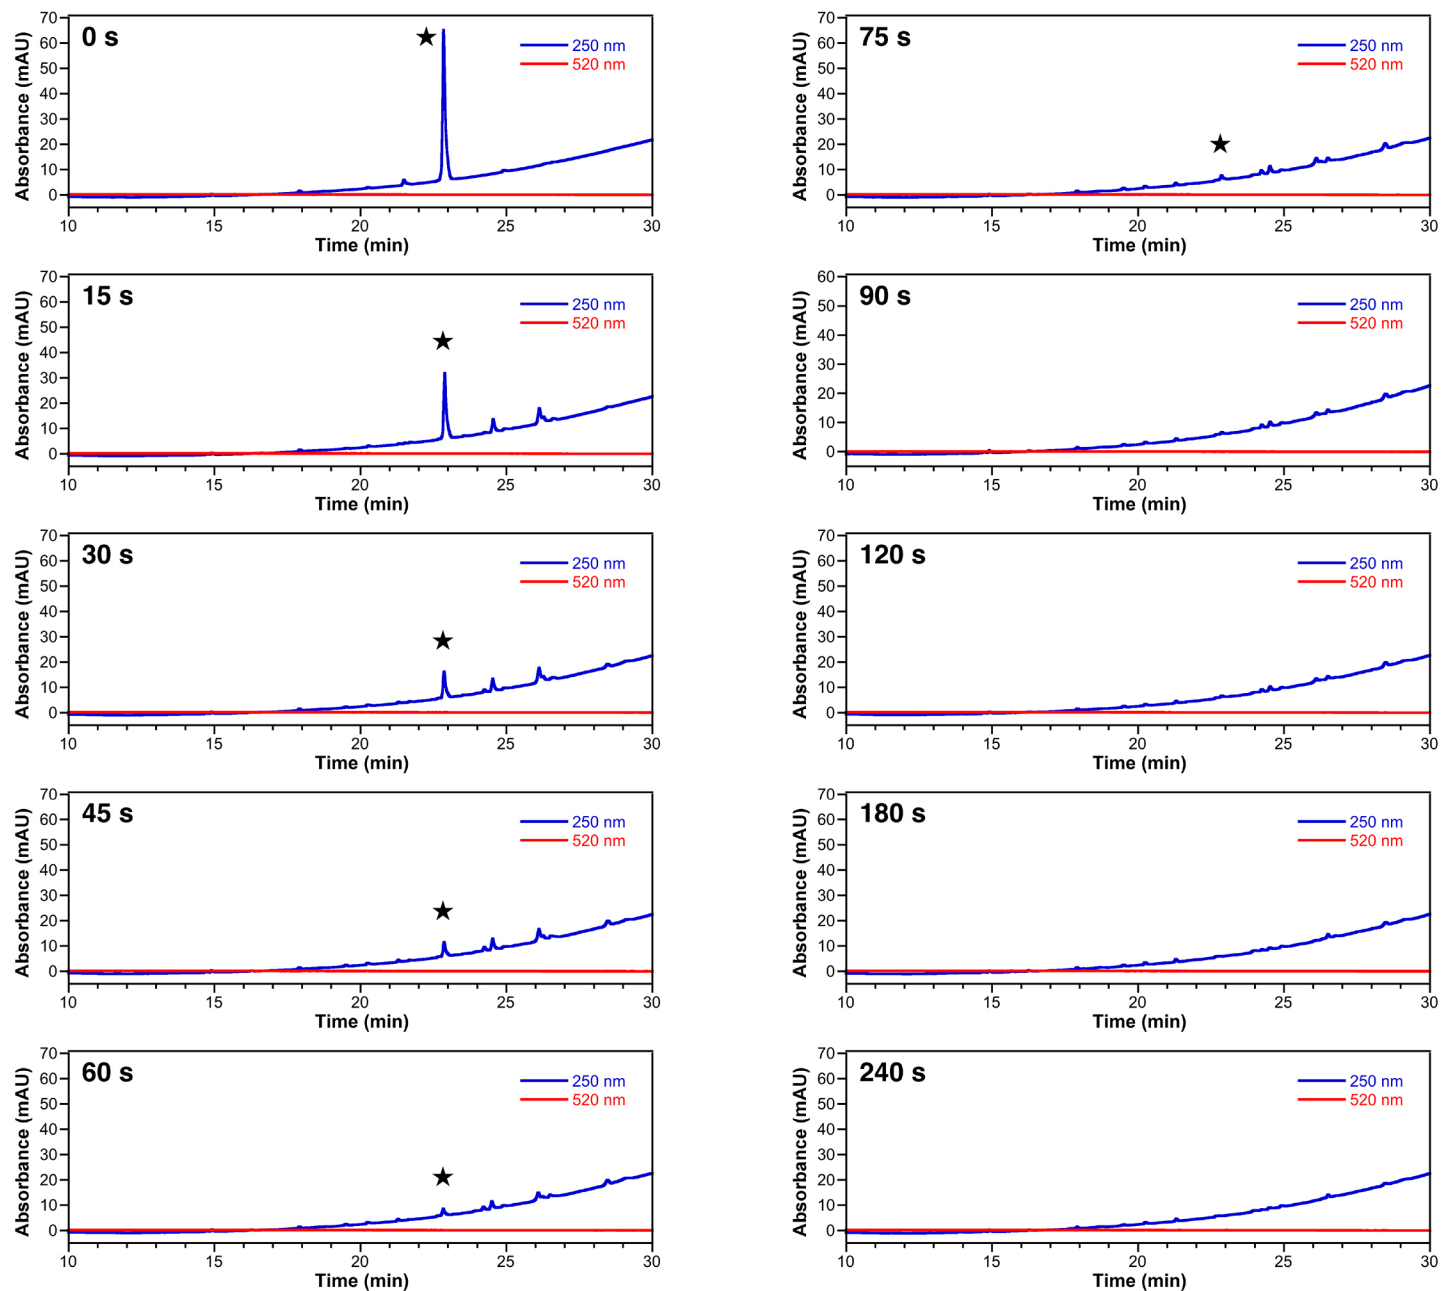

**Figure S12.** HPLC chromatograms of **2** after irradiation with 380 nm light for varying intervals of time, as indicated. Absorbance monitored at 250 nm (blue) and 520 nm (red). Peaks corresponding to **2** are identified with stars. Solvent gradients are given in text.



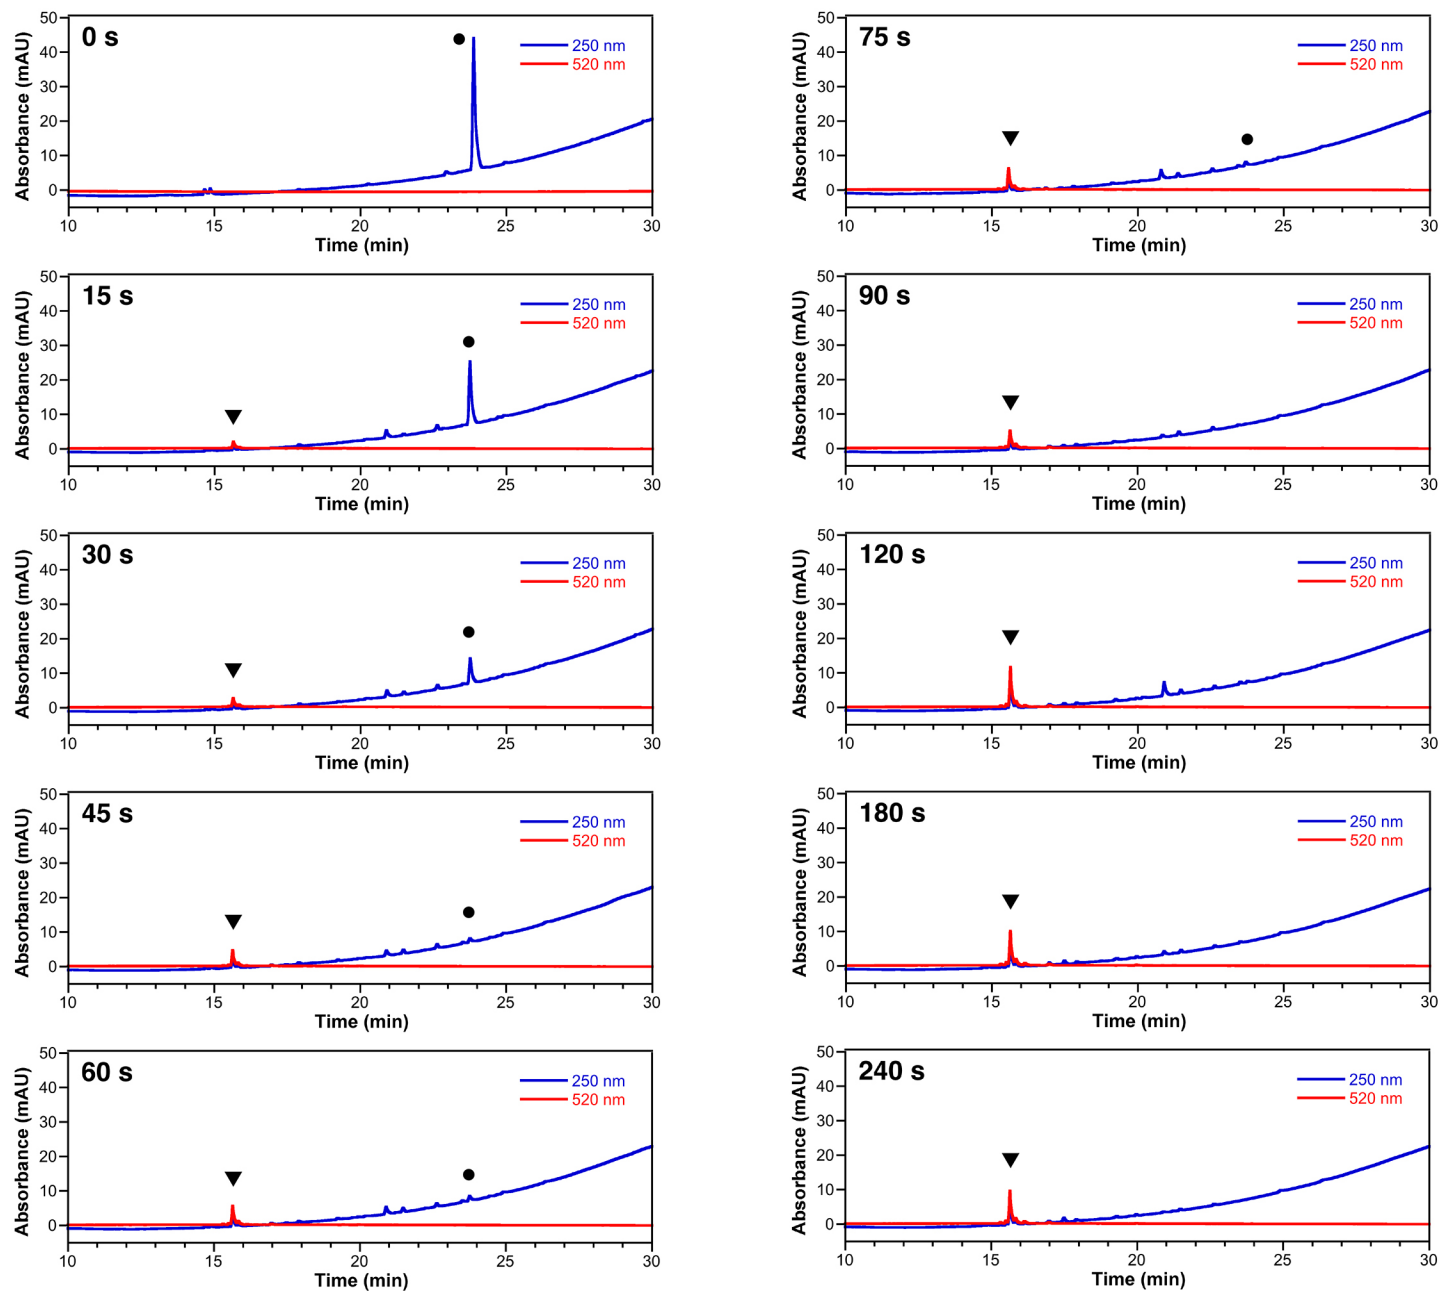

**Figure S13.** HPLC chromatograms of **3** after irradiation with 254 nm light for varying intervals of time, as indicated, in the presence of 10  $\mu\text{M}$   $\text{ZnCl}_2$ . Absorbance monitored at 250 nm (blue) and 520 nm (red). Peaks corresponding to **3** and ZP1 are identified with circles and triangles, respectively. Solvent gradients are given in text.

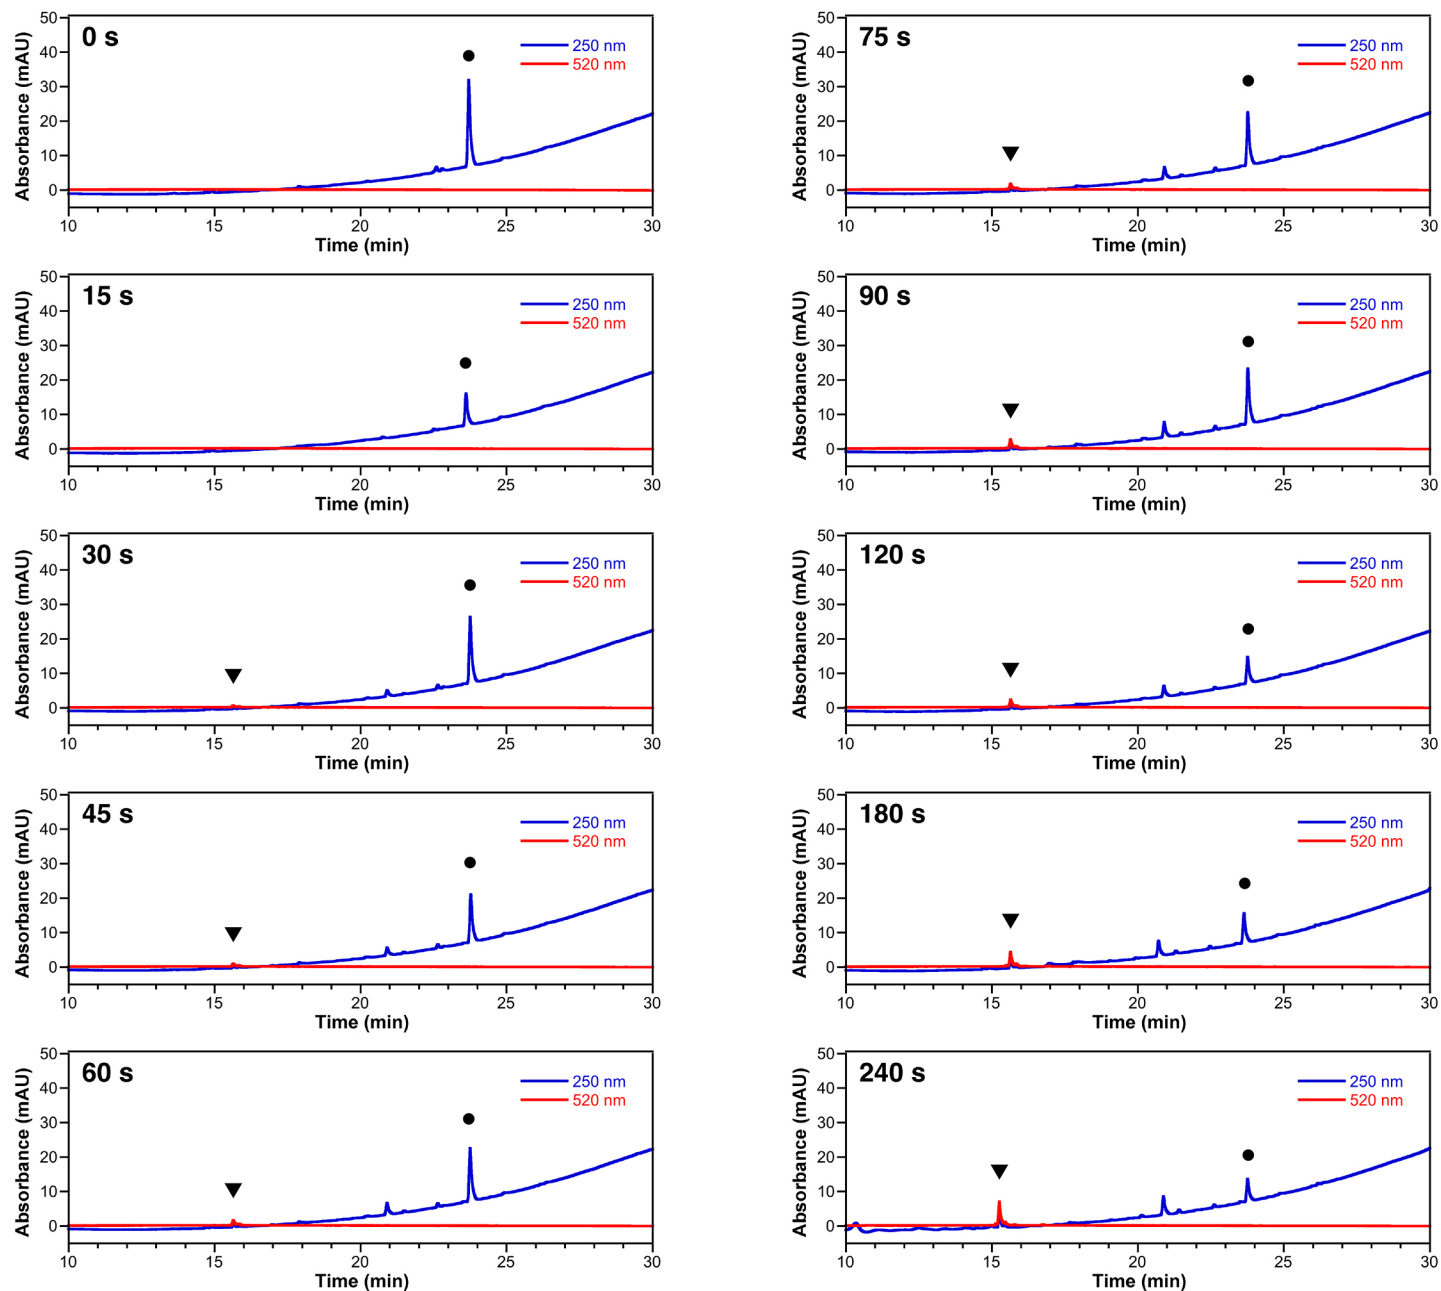

**Figure S14.** HPLC chromatograms of **3** after irradiation with 380 nm light for varying intervals of time, as indicated, in the presence of 10  $\mu\text{M}$   $\text{ZnCl}_2$ . Absorbance monitored at 250 nm (blue) and 520 nm (red). Peaks corresponding to **3** and ZP1 are identified with circles and triangles, respectively. Solvent gradients are given in text.

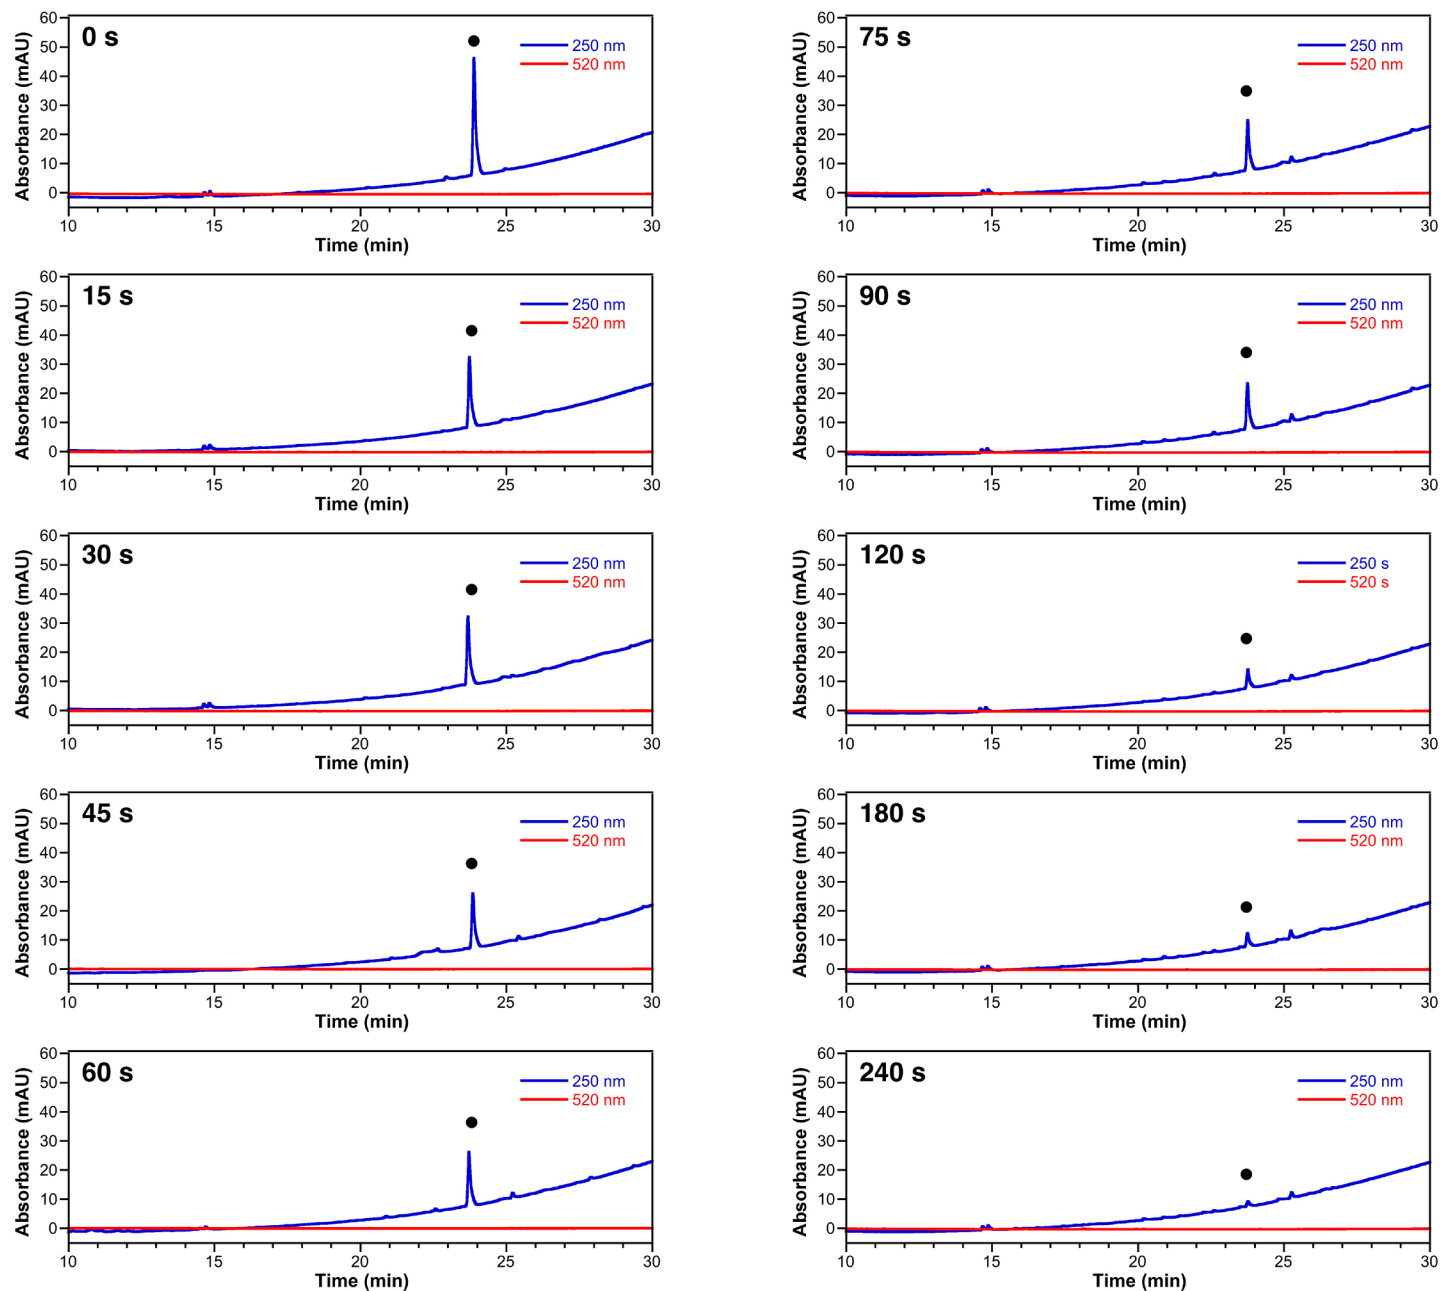

**Figure S15.** HPLC chromatograms of **3** after irradiation with 254 nm light for varying intervals of time, as indicated. Absorbance monitored at 250 nm (blue) and 520 nm (red). Peaks corresponding to **3** are identified with circles. Solvent gradients are given in text.

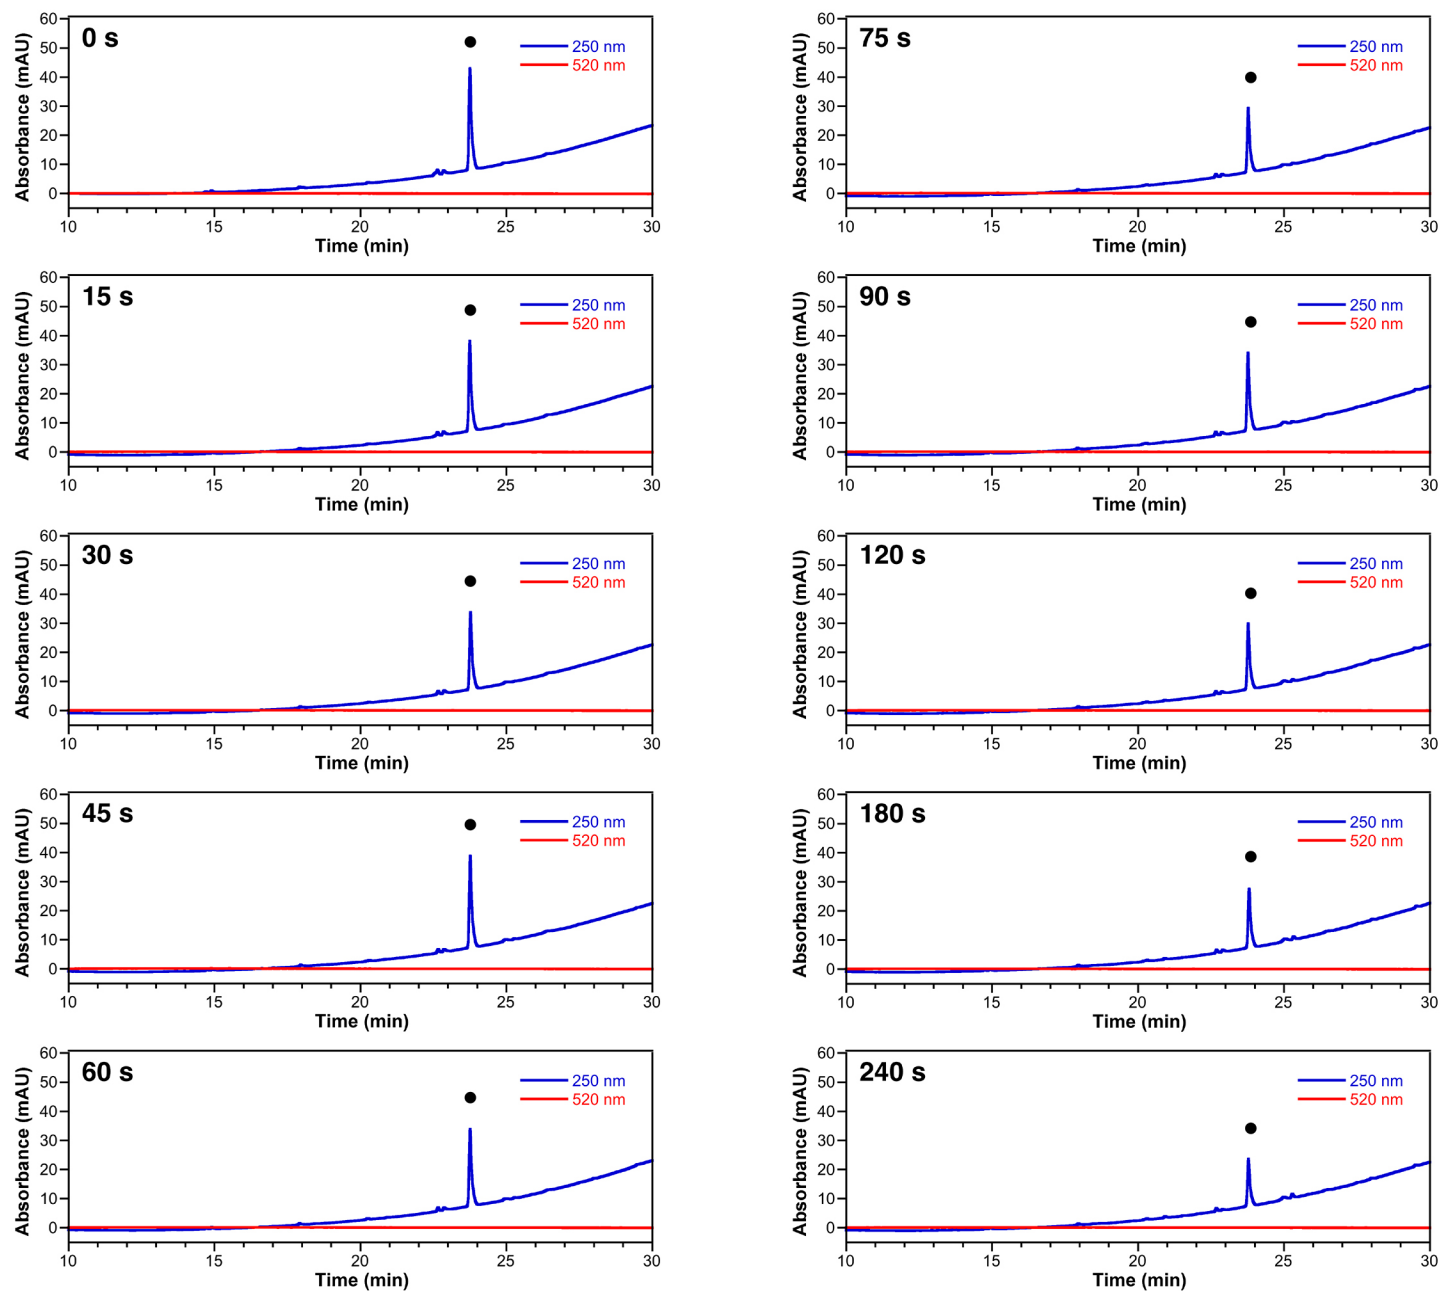

**Figure S16.** HPLC chromatograms of **3** after irradiation with 380 nm light for varying intervals of time, as indicated. Absorbance monitored at 250 nm (blue) and 520 nm (red). Peaks corresponding to **3** are identified with circles. Solvent gradients are given in text.

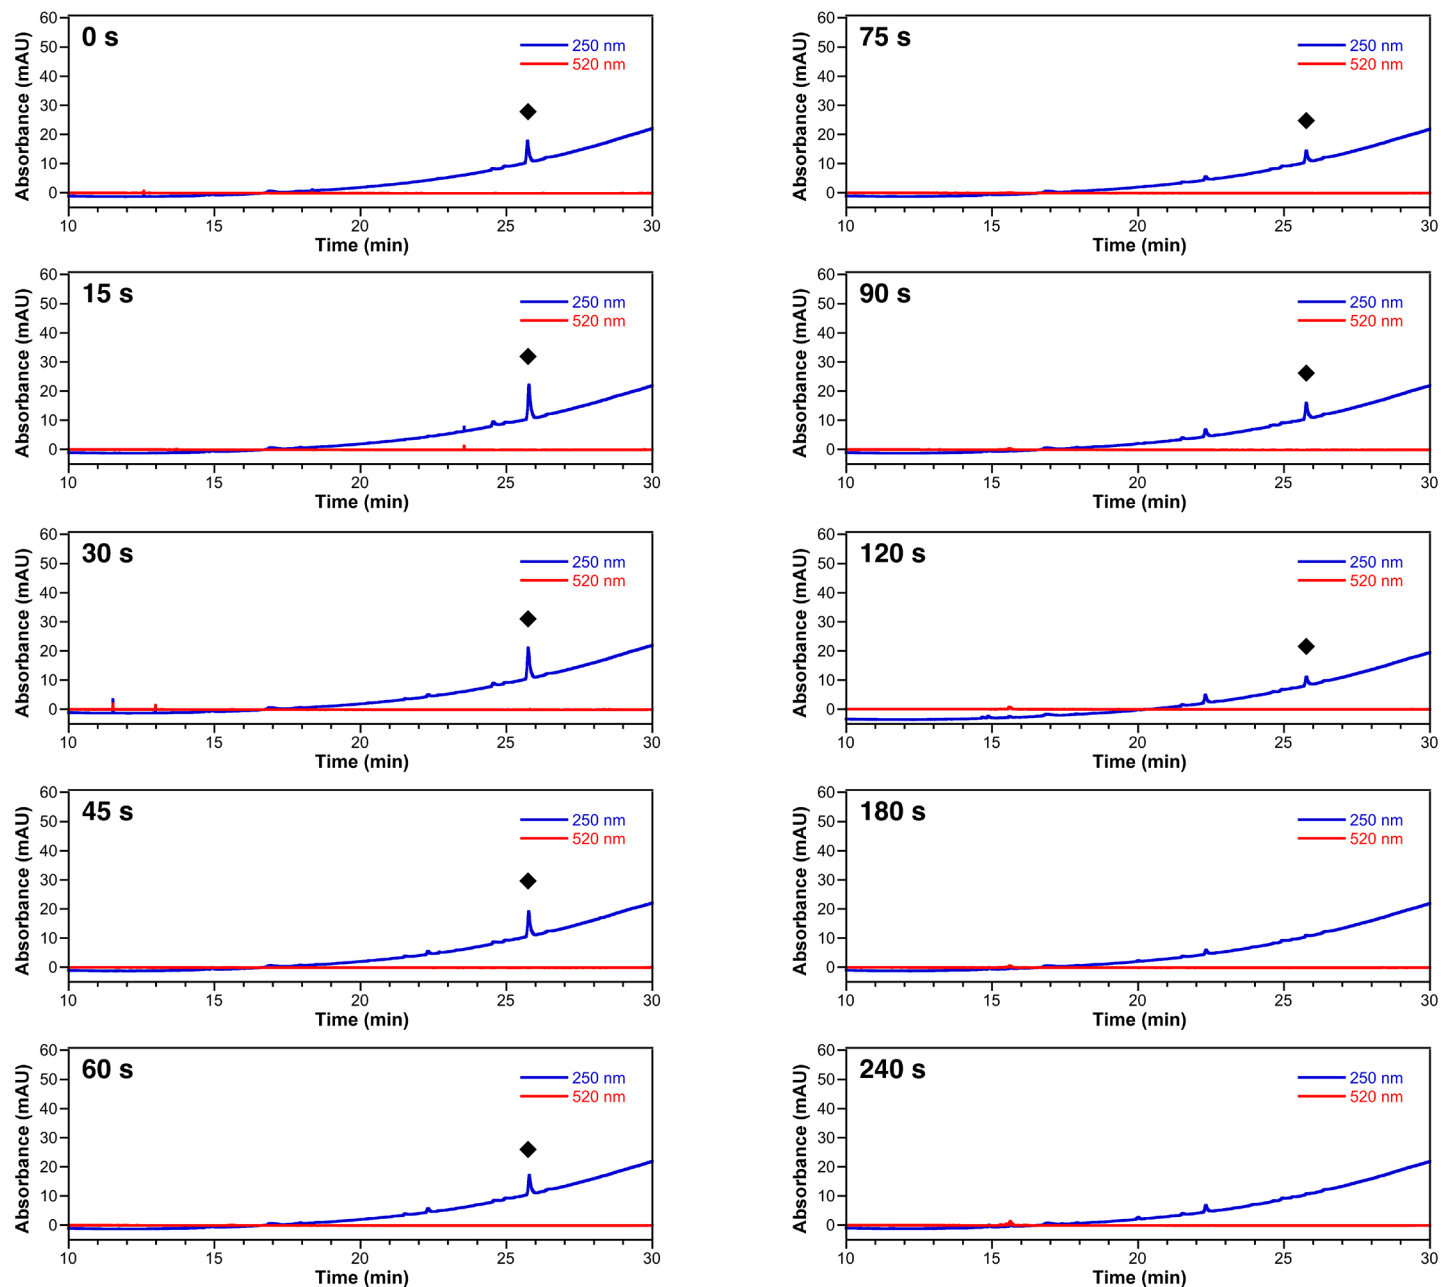

**Figure S17.** HPLC chromatograms of **4** after irradiation with 254 nm light for varying intervals of time, as indicated, in the presence of 10  $\mu\text{M}$   $\text{ZnCl}_2$ . Absorbance monitored at 250 nm (blue) and 520 nm (red). Peaks corresponding to **4** are identified with diamonds. Solvent gradients are given in text.

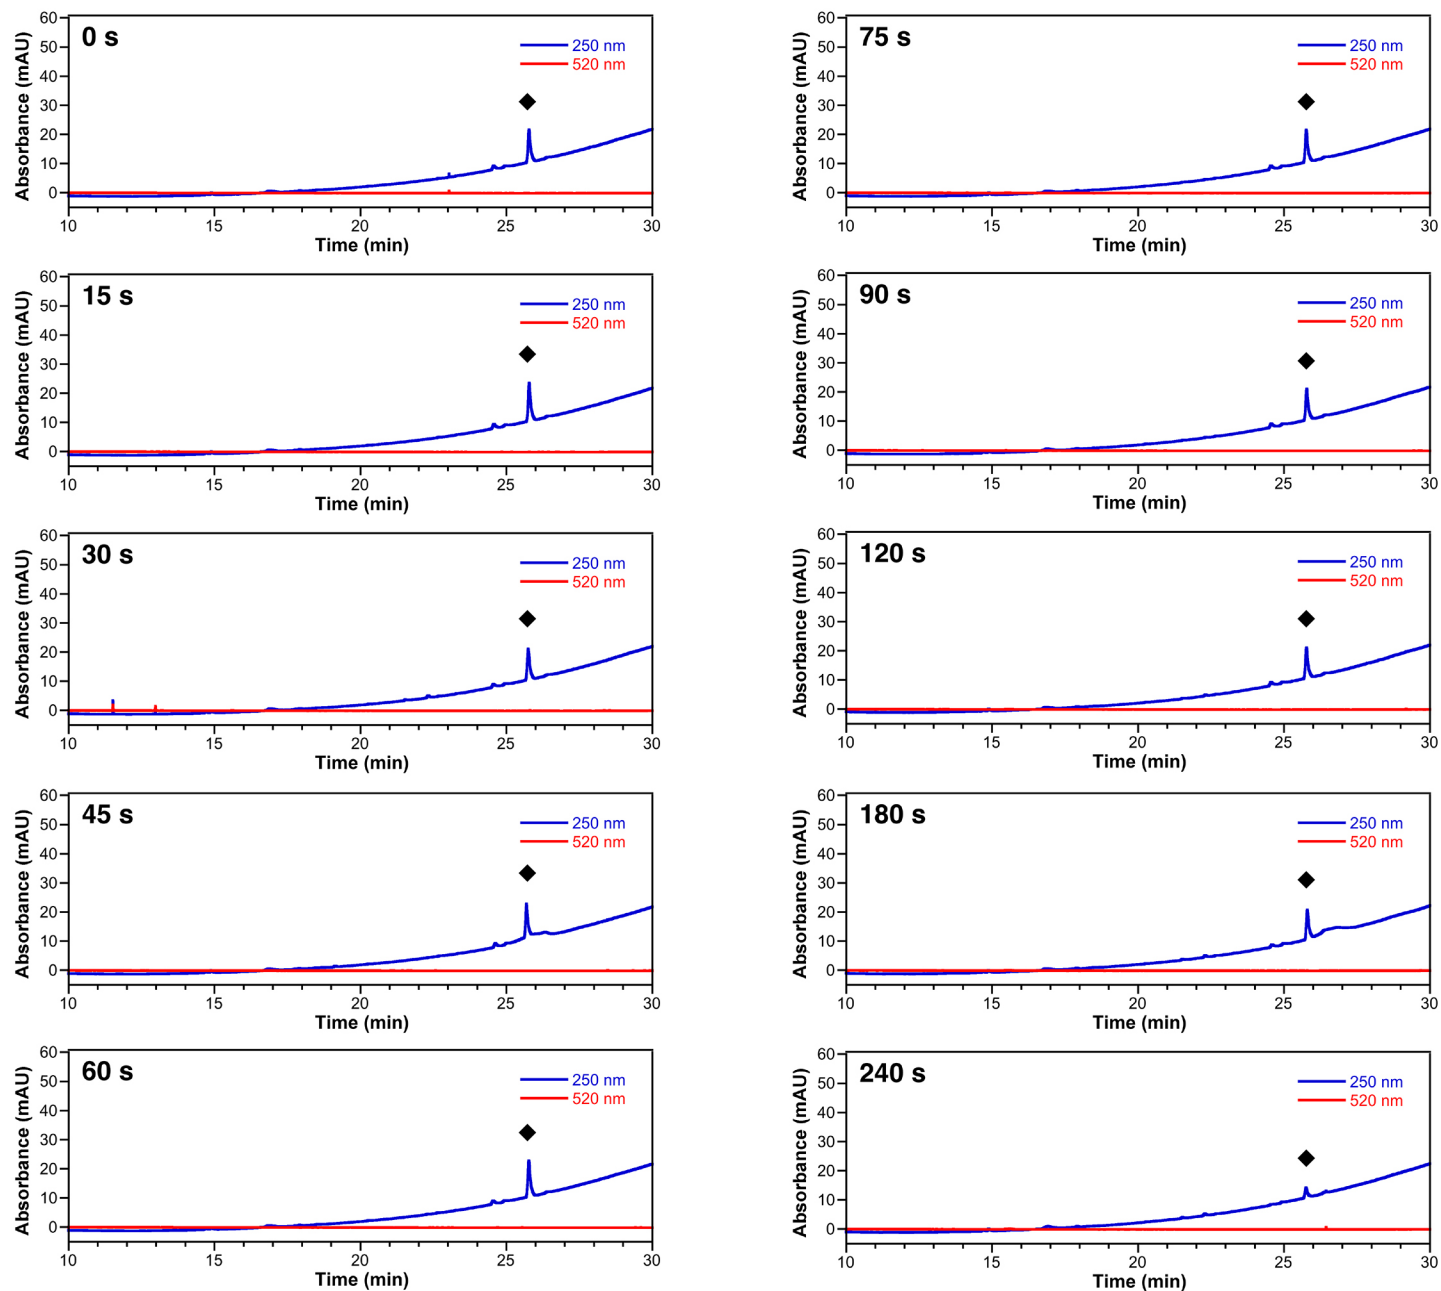

**Figure S18.** HPLC chromatograms of **4** after irradiation with 380 nm light for varying intervals of time, as indicated, in the presence of 10  $\mu\text{M}$   $\text{ZnCl}_2$ . Absorbance monitored at 250 nm (blue) and 520 nm (red). Peaks corresponding to **4** are identified with diamonds. Solvent gradients are given in text.

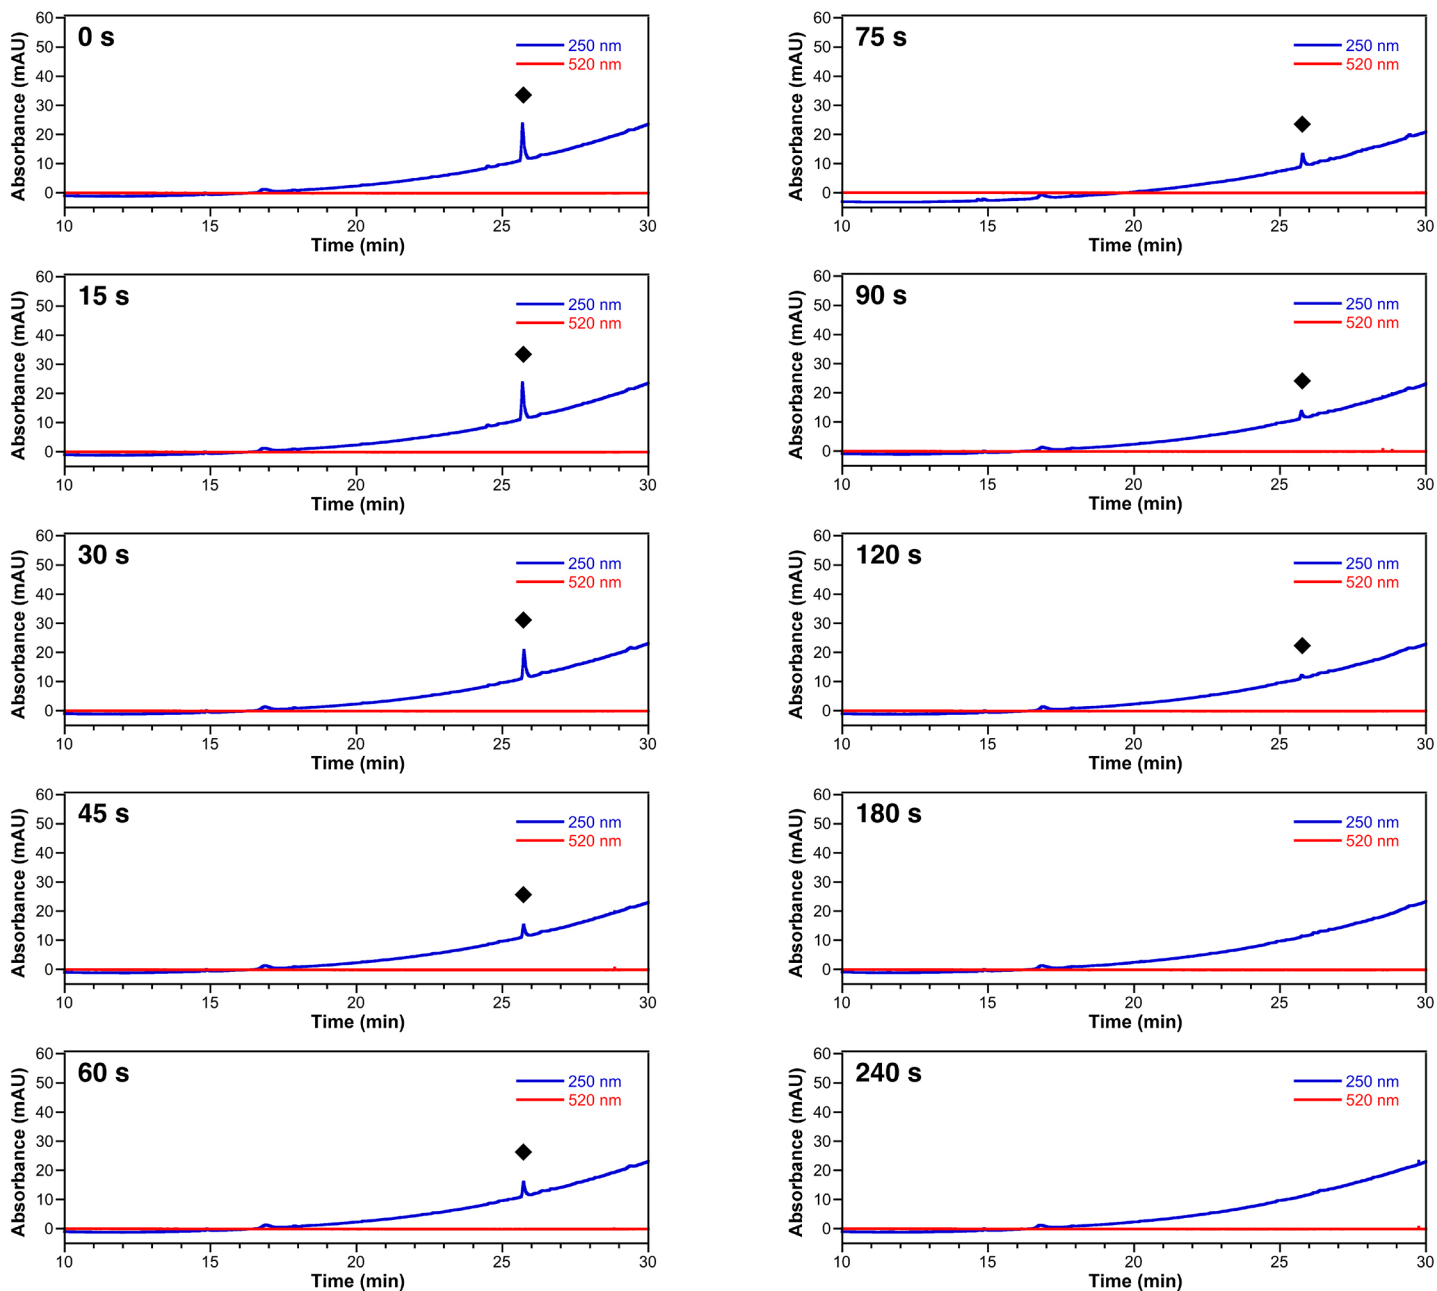

**Figure S19.** HPLC chromatograms of **4** after irradiation with 254 nm light for varying intervals of time, as indicated. Absorbance monitored at 250 nm (blue) and 520 nm (red). Peaks corresponding to **4** are identified with diamonds. Solvent gradients are given in text.

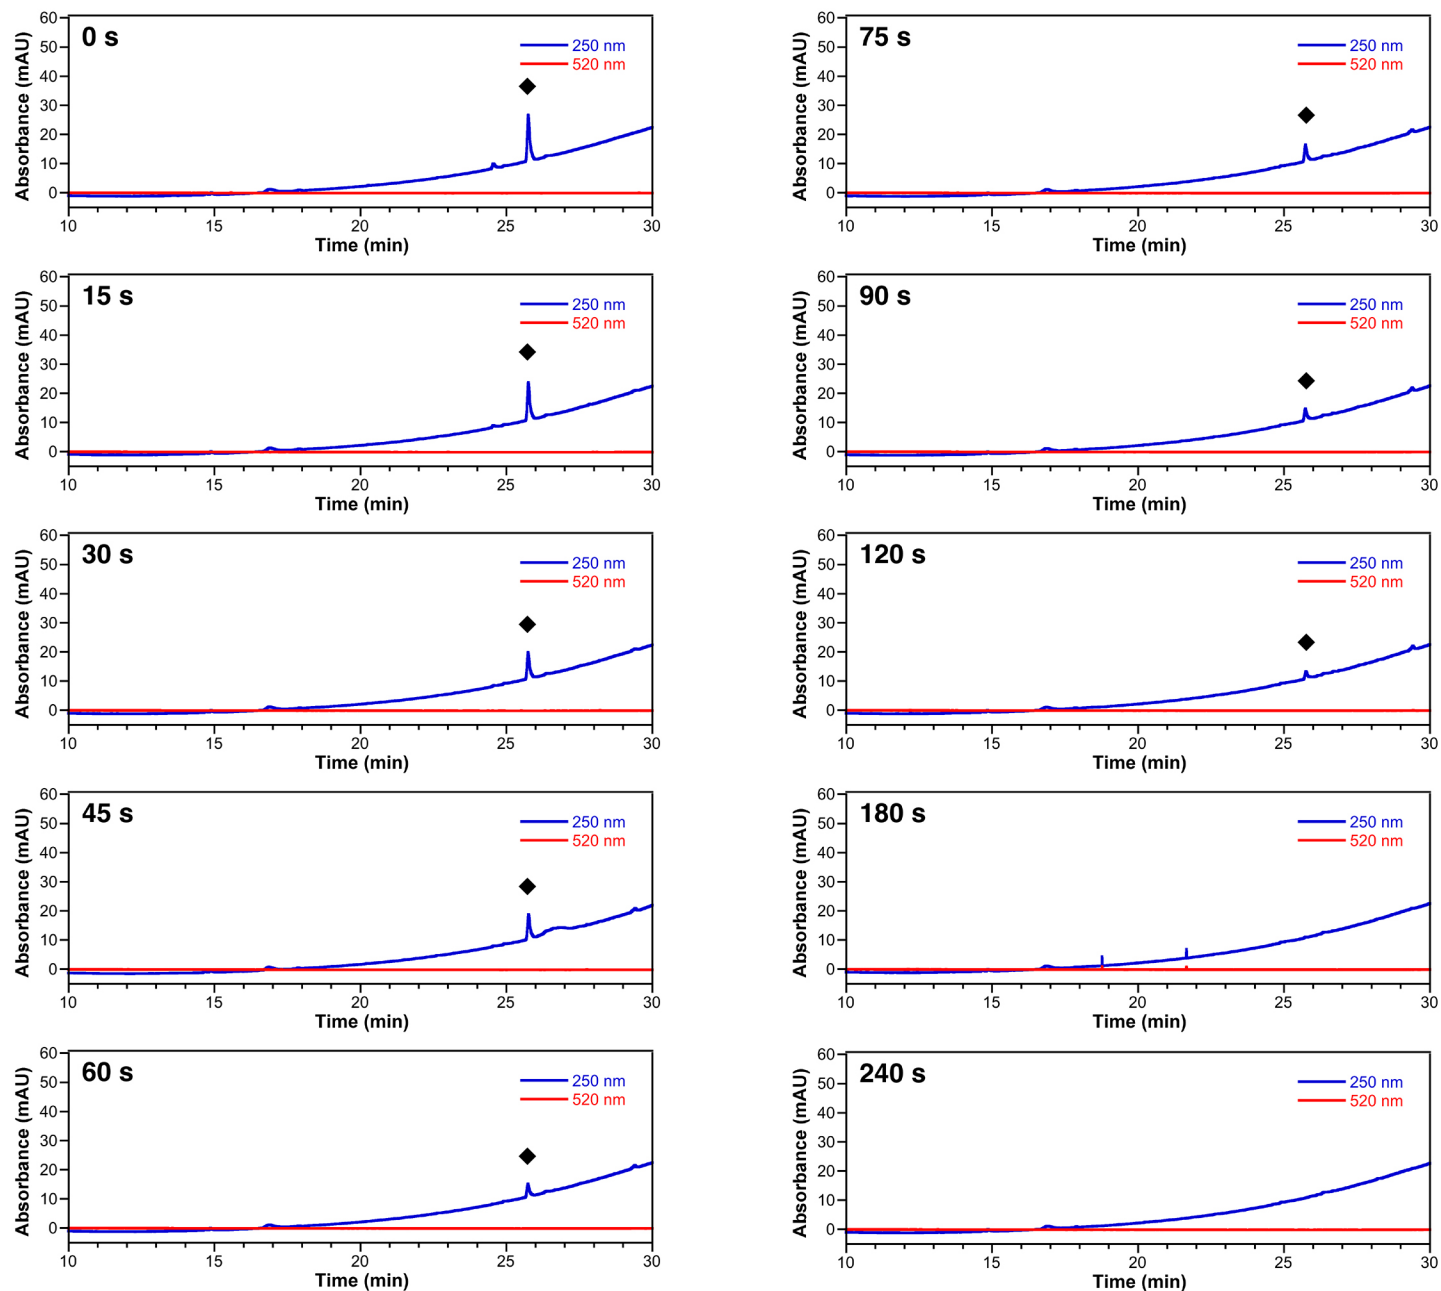

**Figure S20.** HPLC chromatograms of **4** after irradiation with 380 nm light for varying intervals of time, as indicated. Absorbance monitored at 250 nm (blue) and 520 nm (red). Peaks corresponding to **4** are identified with diamonds. Solvent gradients are given in text.



### *pH Dependence of the Zinc Response.*

The fluorescence of **3** was measured in buffers of various pH values. The following buffers were prepared and treated with Chelex® resin according to the manufacturer's protocols: 50 mM potassium acetate, 100 mM KCl, pH 4.0; 50 mM potassium acetate, 100 mM KCl, pH 5.0; 50 mM PIPES, 100 mM KCl, pH 6.0; 50 mM PIPES, 100 mM KCl, pH 7.0; 50 mM Tris, 100 mM KCl, pH 8.0. A typical sample consisted of 1999  $\mu\text{L}$  buffer and 1  $\mu\text{L}$  sensor (final conc. 0.5  $\mu\text{M}$ ). Samples were allowed to stir for  $\sim 1$  min. The fluorescence emission spectrum from 500 – 650 nm of each sample was recorded with an excitation wavelength of 490 nm. The step size was 1 nm. The integration time was 0.2 s. The slit widths were 3 nm and the temperature was 298 K. Samples were irradiated for 60 s with 254 nm light. The fluorescence of each sample was measured again. Samples were also irradiated in the presence of zinc, in which case a 2.0  $\mu\text{L}$  aliquot of  $\text{ZnCl}_2$  (final conc. 20  $\mu\text{M}$ ) was added to each sample after the initial measurement, but before the 60 s irradiation. All experiments were conducted in triplicate. The integrated emission spectra of the sensor before ( $F_0$ ) and after ( $F$ ) irradiation were used to calculate the fluorescence turn-on.

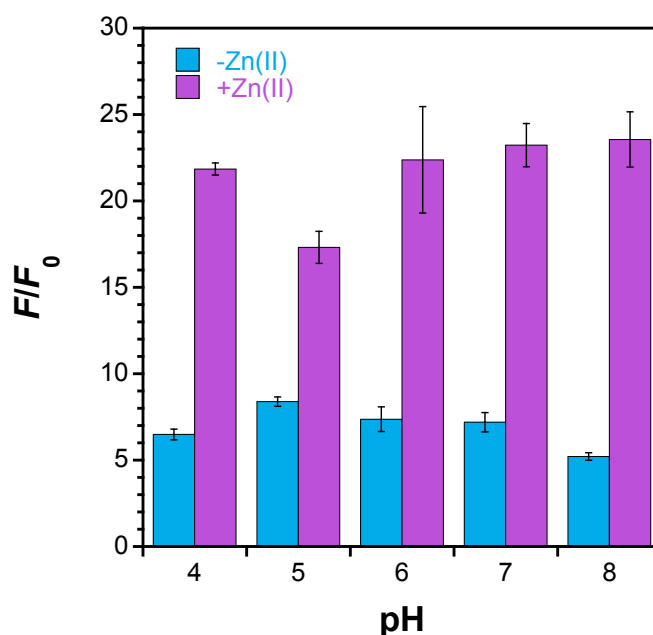

**Figure S21.** Integrated fluorescence turn-on of **3** in buffers of various pH values after 60 s irradiation with 254 nm light in the presence (purple) and absence (blue) of 20  $\mu\text{M}$   $\text{ZnCl}_2$ , as described in the text. Error bars are standard error.

### Metal Selectivity Studies.

Aqueous stock solutions of metal chloride salts were analytically prepared at the following concentrations: 0.80 M CaCl<sub>2</sub> and MgCl<sub>2</sub>; 0.020 M CdCl<sub>2</sub>, CoCl<sub>2</sub>, CuCl<sub>2</sub>, MnCl<sub>2</sub>, NiCl<sub>2</sub>, and ZnCl<sub>2</sub>. A fresh stock solution of **3** (1.0 mM) in DMSO was also prepared. The buffer was 50 mM PIPES, 100 mM KCl, pH 7.0. Samples were prepared in triplicate and consisted of buffer (1999  $\mu$ L) and sensor (1.0  $\mu$ L, final conc. 0.5  $\mu$ M). Samples were stirred for  $\sim$ 1 min. The fluorescence of each sample was recorded with an excitation wavelength of 490 nm. Emission spectra were collected from 500 – 650 nm. An aliquot (2.0  $\mu$ L) of the appropriate metal chloride stock solution was added for a final concentration of 20 or 800  $\mu$ M metal ion. After 1 min of stirring, fluorescence spectra were recorded. Samples were irradiated for 60 s at 254 nm and fluorescence measurements were obtained. For all measurements, the step size was 1 nm. The integration time was 0.2 s. The excitation and emission monochromators were gated with 3 nm slits. The temperature was 298 K. The integrated emission spectra of the sensor before ( $F_0$ ) and after ( $F$ ) irradiation were used to calculate the fluorescence turn-on. All experiments were conducted in triplicate.

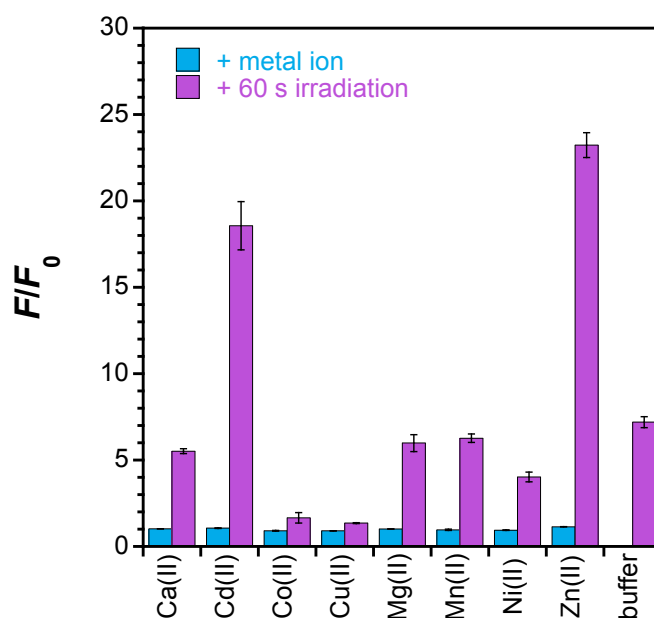

**Figure S22.** Integrated fluorescence turn-on of **3** upon addition of selected metal chloride salts (blue bars) and after subsequent irradiation with 254 nm light for 60 s (purple bars), as described in the text. Error bars are standard error.

### ***Cell Culture and Imaging Experiments.***

HeLa cells (ATTC; CCL-2) were cultured in Dulbecco's Modified Eagle Medium (DMEM) supplemented with 10% heat-deactivated fetal bovine serum (FBS) and 1% penicillin/streptomycin. The cultures were incubated in a humidified atmosphere with 5% CO<sub>2</sub> at 37 °C. Approximately 48 h before imaging, HeLa cells were plated in glass bottom imaging dishes coated with poly-D-lysine (MatTek; 35 mm dishes, No. 1.5 coverslip, 14 mm glass diameter).

Concentrated (1 mM) stock solutions of the sensor in DMSO were prepared and stored as frozen aliquots at -80 °C. A solution of 20% Pluronic<sup>®</sup> F-127 (Sigma-Aldrich) in DMSO (w/v) was prepared and stored at room temperature. Immediately before each imaging experiment, a 1 μL aliquot of the sensor stock solution was combined with an equal volume of the Pluronic<sup>®</sup> F-127 stock solution and mixed gently in a microcentrifuge tube. Dye free DMEM (1 mL) was added to the tube and the resulting solution was mixed thoroughly by pipetting up and down several times. The medium in the imaging dishes was replaced with this solution and the dishes were returned to the incubator. After 15 min, the solution was removed and the cells were washed with phosphate buffered saline (PBS: 0.144 g·L<sup>-1</sup> KH<sub>2</sub>PO<sub>4</sub>, 0.795 g·L<sup>-1</sup> Na<sub>2</sub>HPO<sub>4</sub>, 9.00 g·L<sup>-1</sup> NaCl; 2 mL × 3). A fresh portion of dye free DMEM (1 mL) was added to the dish and the cells were imaged.

Imaging was performed using a Zeiss Axiovert 200M inverted epifluorescence microscope fitted with a Hamamatsu EM-CCD digital camera C9100, a MS200 XY Piezo Z stage, and a 63× oil immersion objective. The light source was an X-Cite 120 metal halide lamp (EXFO). Zeiss standard filter sets 49 (excitation G 365 nm; beamsplitter FT 395 nm; emission BP 445/50 nm) and 38 HE (excitation BP 470/40 nm; beamsplitter FT 495 nm; emission BP 525/50 nm) were used to activate the caged sensors and visualize ZP1, respectively. The microscope was operated with Volocity software (version 6.01). Cells were maintained at 37 °C and under a humidified 5% CO<sub>2</sub> atmosphere with an on-stage incubator. Regions of interest (ROI) were identified using differential interference contrast (DIC) microscopy. DIC images were acquired (14 ms exposure time) of each ROI. Fluorescence images were acquired with the Zeiss 38 HE standard green channel filter set and a 300 ms exposure time. The cells were irradiated with UV light using the Zeiss standard filter set 49 for 15 s and the lowest intensity setting for the EXFO lamp. After a 1 min resting period, images of the green channel fluorescence were recorded with a 300 ms exposure time. A solution of warm dye free DMEM (1 mL; ~37 °C) containing 20 μM ZnCl<sub>2</sub> and 40 μM sodium pyruvate was gently added to the imaging dish and the cells were allowed to incubate on the microscope stage for 5 min. An additional set of fluorescence images was acquired. A solution of tris(2-pyridylmethyl)amine (TPA; 2 μL of a 20 mM stock solution in DMSO) in warm dye free DMEM (1 mL, 37 °C) was carefully added to the imaging dish and the cells were allowed to incubate on the microscope stage for 10 min. A final series of fluorescence images was acquired. Microscopy data were analyzed in ImageJ (version 1.50b) to quantify the average background corrected fluorescence intensity of each

cell in each ROI. These experiments were repeated multiple times using cells from at least two separate passages.

For some experiments, zinc pyrithione was added before irradiation with UV light using a procedure analogous to that described above. Here, the zinc pyrithione stock solution in DMEM (1 mL) was added before the plate was transferred to the microscope stage. After a 5 min incubation period, the medium was replaced with fresh dye free DMEM and cells were imaged as described above. In some cases, the zinc pyrithione solution was added before the cells were treated with the sensor. In these experiments, the zinc pyrithione solution was removed from the cells after a 5 min incubation period. A fresh solution of the sensor and Pluronic F-127 was added to the imaging dish and the cells were incubated for 15 min before the medium was replaced with fresh dye free DMEM. The cells were imaged as described above.

In separate experiments, the cells were incubated with the sensor and Pluronic F-127 in the presence of 50  $\mu\text{M}$   $\text{ZnCl}_2$  for 15 min prior to imaging using the procedure described above. In some cases, a solution of zinc pyrithione was added to the cells before irradiation. Here, after the medium containing the sensor was removed, the cells were incubated with a fresh solution of zinc pyrithione in DMEM for 5 min. After this medium was replaced with dye free DMEM, the cells were imaged in the usual way.

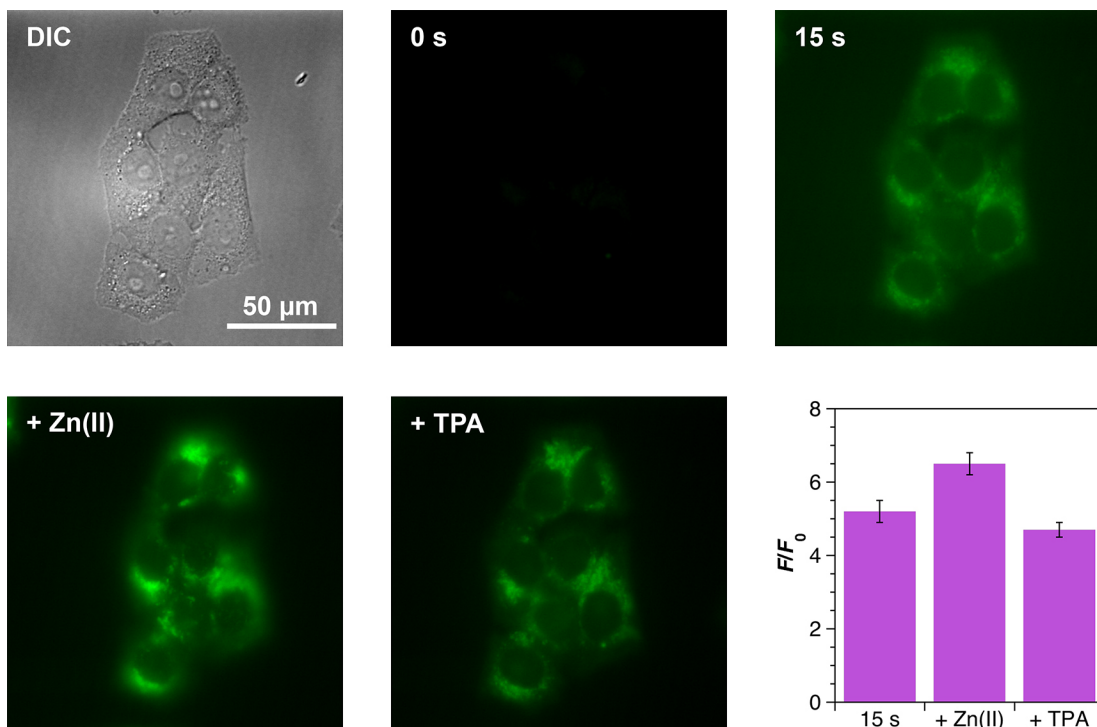

**Figure S23.** Representative differential interference contrast (DIC, upper left) and fluorescence microscopy images of HeLa cells treated with 1  $\mu\text{M}$  **3** before and after irradiation with UV light for 15 s and after addition of 10  $\mu\text{M}$  zinc pyrithione and subsequent addition of 13  $\mu\text{M}$  TPA, as described in the text. Average integrated fluorescence turn-on for each condition is shown ( $n = 51$ ). Error bars are standard error.  $p = 1.3 \times 10^{-23}$  (15 s vs. Zn);  $p = 2.9 \times 10^{-25}$  (Zn vs. TPA);  $p = 4.6 \times 10^{-2}$  (15 s vs. TPA).

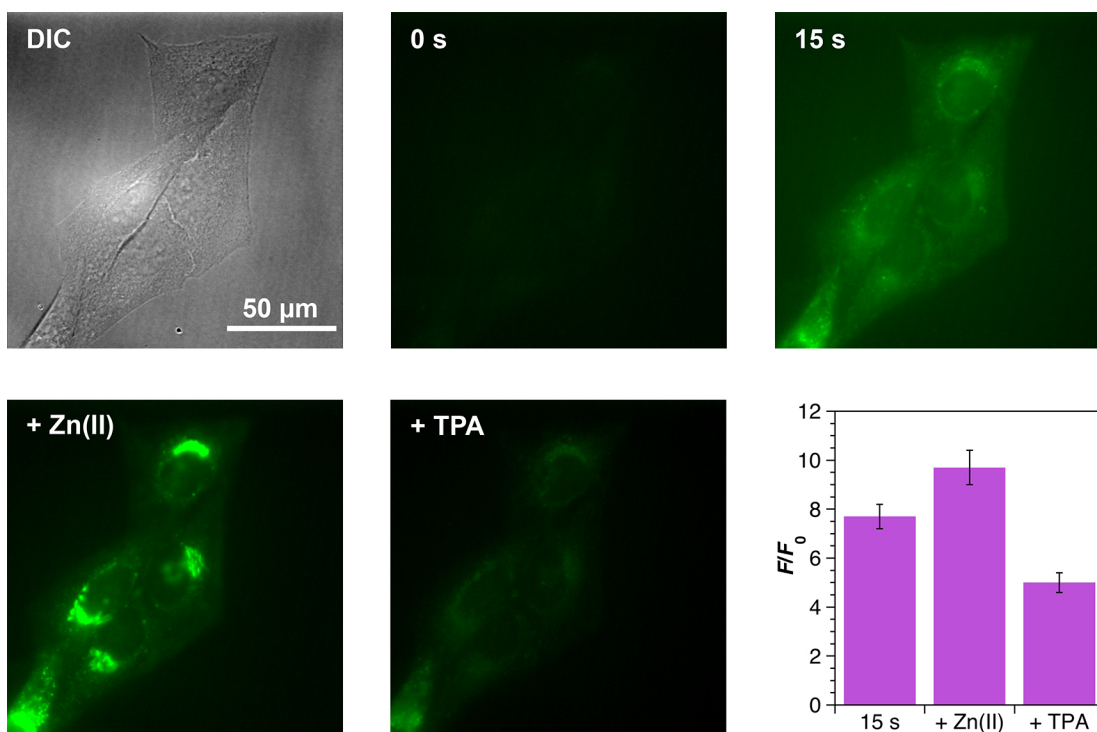

**Figure S24.** Representative differential interference contrast (DIC, upper left) and fluorescence microscopy images of HeLa cells treated with 1  $\mu\text{M}$  **1** before and after irradiation with UV light for 15 s and after addition of 10  $\mu\text{M}$  zinc pyrithione and subsequent addition of 13  $\mu\text{M}$  TPA, as described in the text. Average integrated fluorescence turn-on for each condition is shown ( $n = 52$ ). Error bars are standard error.  $p = 4.5 \times 10^{-9}$  (15 s vs. Zn);  $p = 8.7 \times 10^{-19}$  (Zn vs. TPA);  $p = 1.3 \times 10^{-22}$  (15 s vs. TPA)

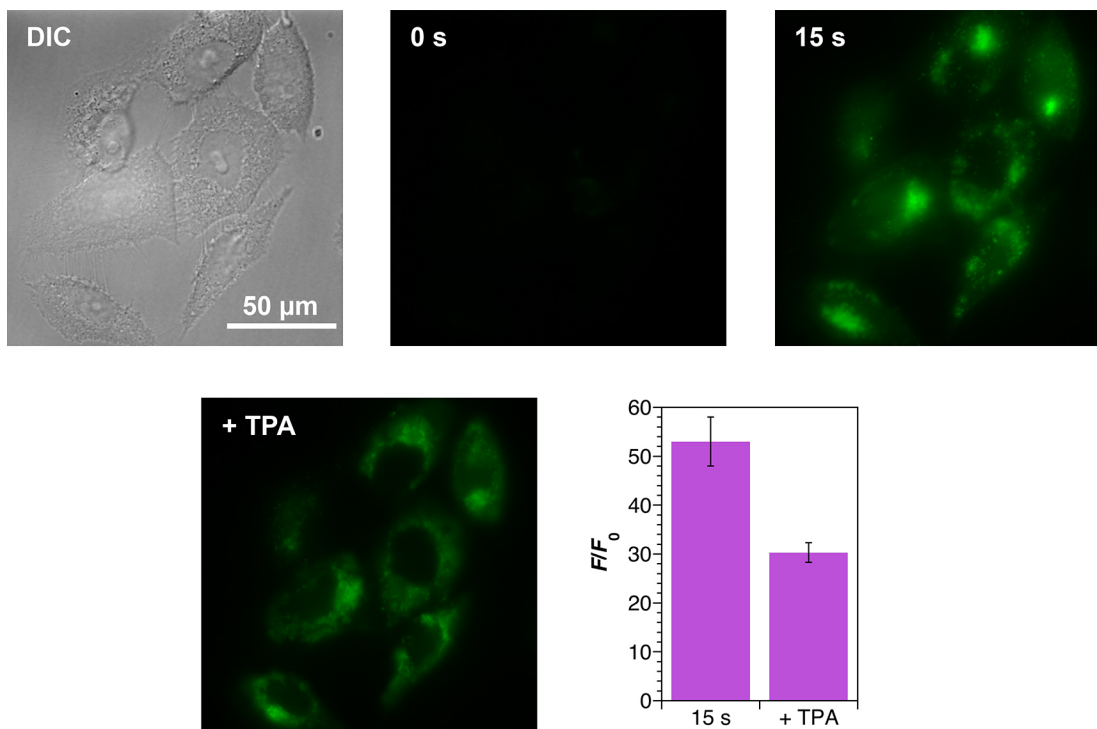

**Figure S25.** Representative differential interference contrast (DIC, upper left) and fluorescence microscopy images of HeLa cells treated with 1  $\mu\text{M}$  **1** and then incubated with 10  $\mu\text{M}$  zinc pyrithione before and after irradiation with UV light for 15 s and after subsequent addition of 13  $\mu\text{M}$  TPA, as described in the text. Average integrated fluorescence turn-on for each condition is shown ( $n = 99$ ). Error bars are standard error.  $p = 3.0 \times 10^{-11}$ .

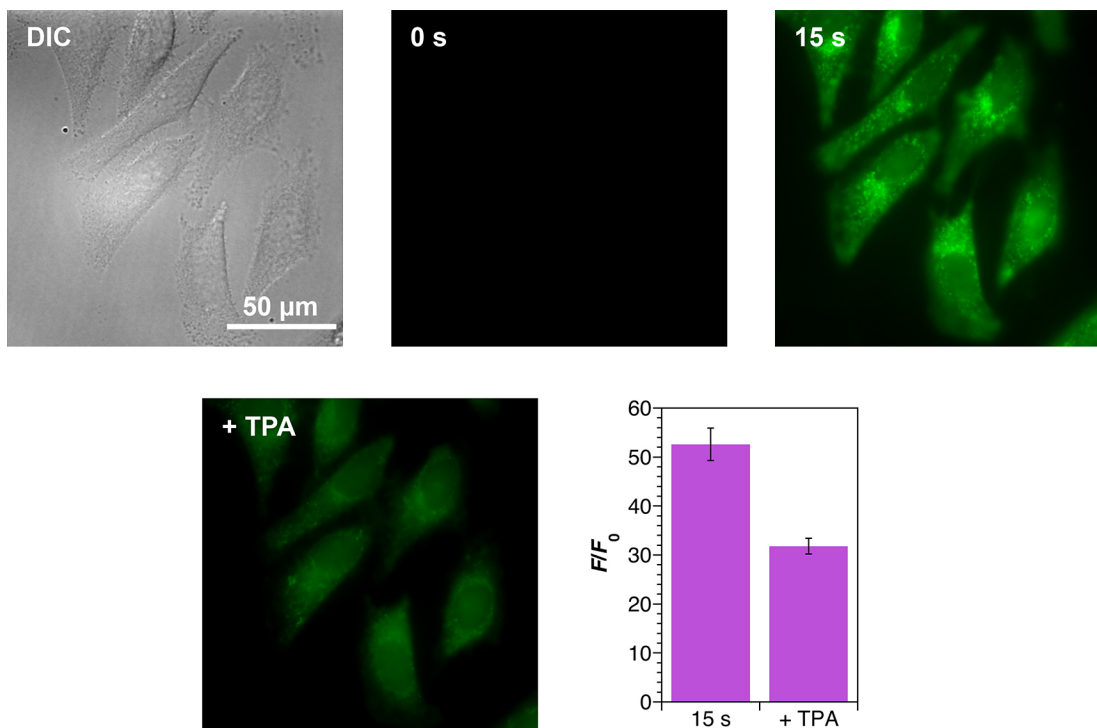

**Figure S26.** Representative differential interference contrast (DIC, upper left) and fluorescence microscopy images of HeLa cells incubated with a mixture of 1  $\mu\text{M}$  **3** and 50  $\mu\text{M}$   $\text{ZnCl}_2$  prior to treatment with 10  $\mu\text{M}$  zinc pyrithione before and after irradiation with UV light for 15 s and after subsequent addition of 13  $\mu\text{M}$  TPA, as described in the text. Average integrated fluorescence turn-on for each condition is shown ( $n = 88$ ). Error bars are standard error.  $p = 3.0 \times 10^{-23}$ .

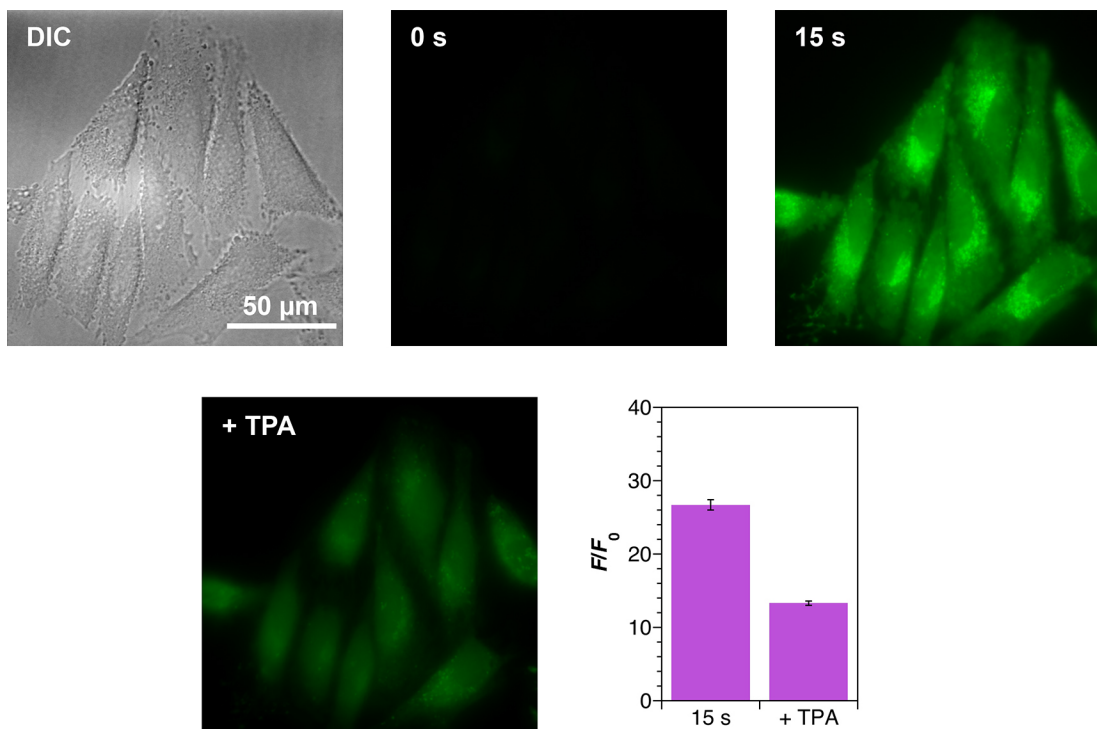

**Figure S27.** Representative differential interference contrast (DIC, upper left) and fluorescence microscopy images of HeLa cells incubated with 10  $\mu\text{M}$  zinc pyrithione prior to treatment with 1  $\mu\text{M}$  **3** before and after irradiation with UV light for 15 s and after subsequent addition of 13  $\mu\text{M}$  TPA, as described in the text. Average integrated fluorescence turn-on for each condition is shown ( $n = 98$ ). Error bars are standard error.  $p = 1.8 \times 10^{-54}$ .

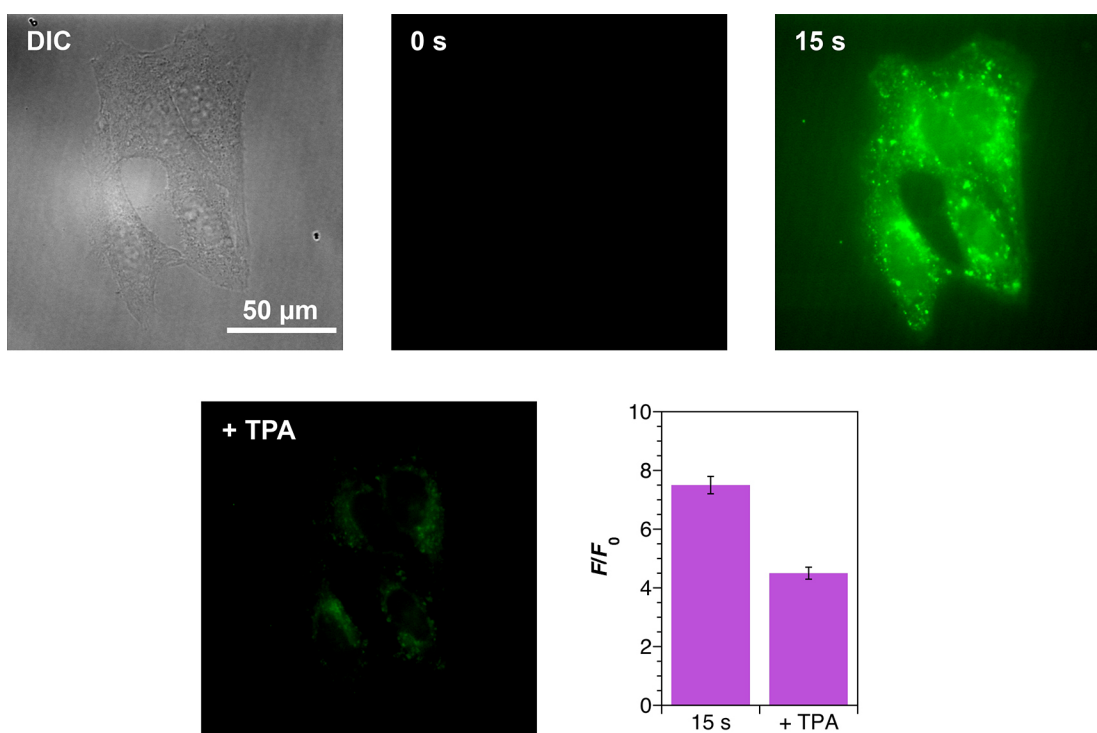

**Figure S28.** Representative differential interference contrast (DIC, upper left) and fluorescence microscopy images of HeLa cells incubated with a mixture of 1  $\mu\text{M}$  **3** and 50  $\mu\text{M}$   $\text{ZnCl}_2$  before and after irradiation with UV light for 15 s and after subsequent addition of 13  $\mu\text{M}$  TPA, as described in the text. Average integrated fluorescence turn-on for each condition is shown ( $n = 88$ ). Error bars are standard error.  $p = 8.4 \times 10^{-29}$ .

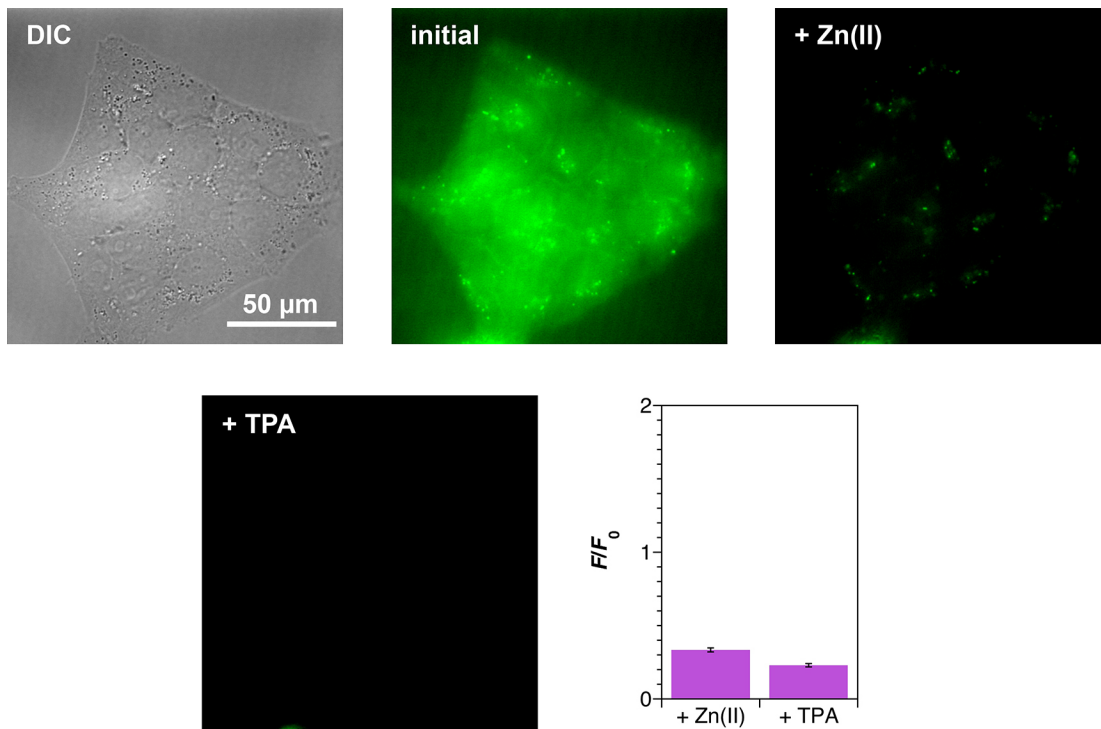

**Figure S29.** Representative differential interference contrast (DIC, upper left) and fluorescence microscopy images of HeLa cells incubated with a mixture of 1 μM ZP1, 0.02% (w/v) Pluronic F-127, and 50 μM ZnCl<sub>2</sub> before and after addition of 10 μM zinc pyrithione, and after subsequent addition of 13 μM TPA, as described in the text. Average integrated fluorescence turn-on for each condition is shown (n = 75). Error bars are standard error.  $p = 1.2 \times 10^{-20}$ . The decrease in fluorescence upon addition of Zn(II) is due to extracellular sensor being washed away during application of zinc pyrithione.

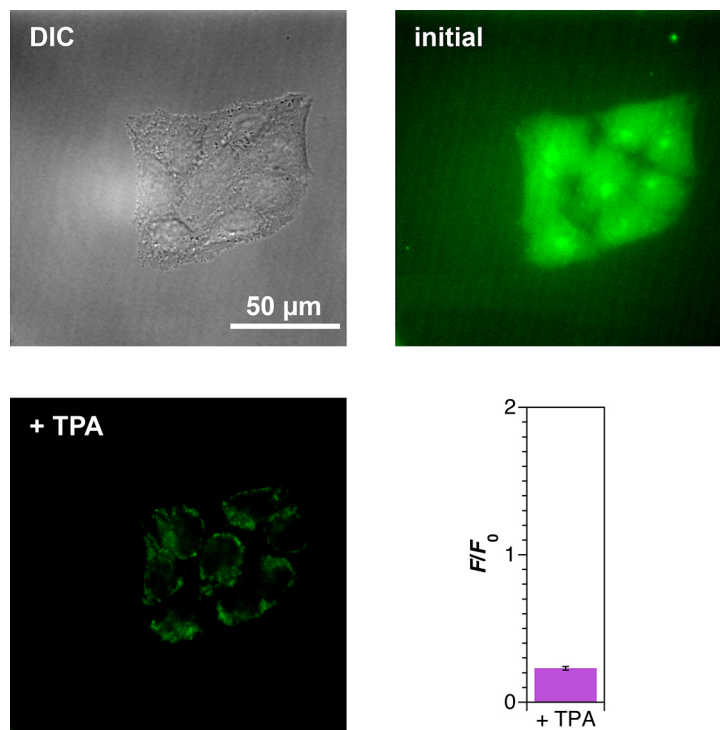

**Figure S30.** Representative differential interference contrast (DIC, upper left) and fluorescence microscopy images of HeLa cells incubated with 10 μM zinc pyrithione prior to treatment with 1 μM ZP1 and after subsequent addition of 13 μM TPA, as described in the text. Average integrated fluorescence turn-on for each condition is shown (n = 75). Error bars are standard error.



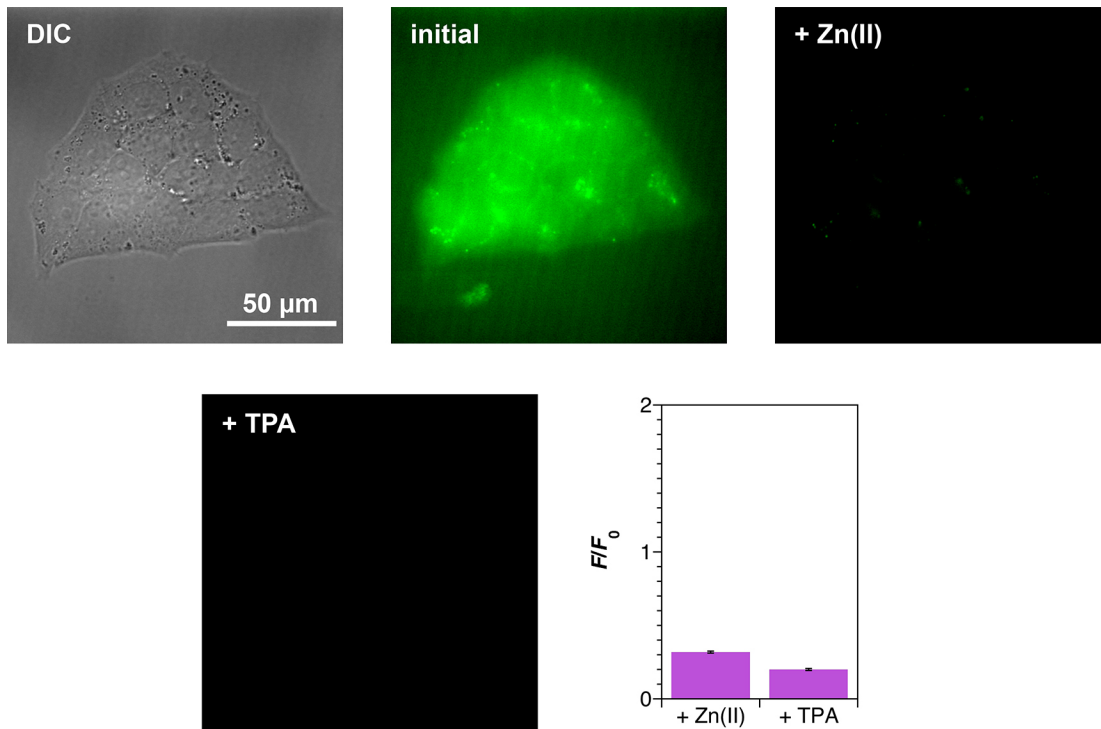

**Figure S31.** Representative differential interference contrast (DIC, upper left) and fluorescence microscopy images of HeLa cells incubated with a mixture of 1  $\mu\text{M}$  ZP1 and 50  $\mu\text{M}$   $\text{ZnCl}_2$  before and after treatment with 10  $\mu\text{M}$  zinc pyrithione before and after subsequent addition of 13  $\mu\text{M}$  TPA, as described in the text. Average integrated fluorescence turn-on for each condition is shown ( $n = 72$ ). Error bars are standard error.  $p = 1.1 \times 10^{-52}$ . The decrease in fluorescence upon addition of Zn(II) is due to extracellular sensor being washed away during application of zinc pyrithione.

### ***Experiments in DCN brain slices.***

***Animals.*** All procedures were approved by the Institutional Animal Care and Use Committee at the University of Pittsburgh, Pittsburgh, PA

***Preparation of DCN brain slices.*** Male or female ICR mice (Harlan) aged between postnatal day 20 (P20) and P22 were used. Mice were anesthetized with isoflurane then immediately decapitated and brains were rapidly removed. Brain slices were prepared in warm (34 °C) artificial cerebrospinal fluid (ACSF) containing the following (in mM): 130 NaCl, 3 KCl, 1.2 CaCl<sub>2</sub>·2H<sub>2</sub>O, 1.3 MgCl<sub>2</sub>·6H<sub>2</sub>O, 20 NaHCO<sub>3</sub>, 3 HEPES, and 10 D-glucose, saturated with 95% O<sub>2</sub>/5% CO<sub>2</sub> (v/v), pH = 7.25-7.35, ~300 mOsm. Coronal slices (210 μm thickness) containing cross sections including the molecular and deep layers of the dorsal cochlear nucleus (DCN) were cut using a Vibratome (VT1200S; Leica), then transferred to a holding chamber containing warm ACSF and incubated for ~60 min at 34 °C before initiating imaging experiments. ACSF used for incubating and imaging had the same composition as cutting ACSF, except contaminating zinc was removed by stirring the ACSF with Chelex 100 resin (Bio-Rad) for 1 hour. Chelex resin was filtered using Nalgene rapid flow filters lined with polyethersulfone (0.2 μm pore size), then high purity CaCl<sub>2</sub>·2H<sub>2</sub>O and MgCl<sub>2</sub>·6H<sub>2</sub>O (99.995%; Sigma-Aldrich) were added to the ACSF. All plastic- and glassware were washed with 5% nitric acid.

***Fluorescence imaging and laser photoactivation.*** Slices were transferred to the imaging chamber and perfused with room temperature recirculating ACSF (1-2 mL/min). Prior to fluorescence imaging, 1 μL **3** (1 mM) was mixed with 1 μL 20% Pluronic F-127 (Invitrogen), then added to the ACSF for a final concentration of 1 μM **3**. Slices were allowed to incubate with **3** in the imaging chamber for 20 min before initiating fluorescence imaging. Images were acquired using an upright microscope (Olympus BX5) with a 20× water immersion objective and epifluorescence optics. The excitation source was a blue LED (470 nm wavelength, M470L3, Thorlabs), and green fluorescent signals were isolated using a GFP filter (U-N41017, Olympus) and acquired using a CCD camera (Retiga 2000R, QImaging). Images of fluorescent signals were captured before and after UV laser photostimulation. Photostimulation with UV laser light (355 nm, ~5.5 mW; DPSS Lasers) was performed under the 20× objective, and the photostimulation grid consisted of 8 × 8 sites (40 μm spacing) positioned to encompass the molecular layer and deep layer of the DCN. Each site was photostimulated with a 1 ms pulse of UV laser light (0.4 s between sites), and photostimulation of the entire grid was repeated 5 times.

***Data analysis.*** All analysis was performed with custom routines in MATLAB (Mathworks) or with Prism 6 (GraphPad). For fluorescent images captured before and after photostimulation, a region of interest was selected containing the top row (molecular layer) or bottom row (deep layer) of the photostimulation grid. Fluorescence intensity was averaged within each region, and the change in intensity ( $\Delta F$ ) was calculated by subtracting the intensity before photostimulation from the intensity after photostimulation.  $\Delta F/F$  was calculated by dividing  $\Delta F$  by the intensity before photostimulation. Statistical comparison of  $\Delta F/F$  in the molecular layer versus the deep layer was performed using an unpaired *t* test with Welch's correction.

### Theoretical Calculations.

To examine the influence of the photocleavable protecting groups on the coordination environment of the zinc binding sites, we investigated the structures of **1**, **2**, and **3** with DFT calculations.<sup>7</sup> Geometry optimization was performed at the CPCM(H<sub>2</sub>O)-B3LYP/6-31G level of theory.<sup>8-9</sup> The starting structural parameters of the ZP1 skeleton, in the lactone form, were adapted from previous calculations.<sup>10</sup> To minimize steric interactions between the photocleavable protecting groups and the ZP1 backbone, the following sets of dihedral angle values were used in the initial structures. For the first set, we used  $\varphi_{C1-C2-O6-C7} = 90^\circ$  (*trans* with respect to the di(2-picolyl)amine (DPA) arm),  $\varphi_{C2-O6-C7-C8} = 180^\circ$  (*trans* with respect to the fluorescein backbone), and  $\varphi_{O6-C7-C8-C9} = 90^\circ$ . For the second set, we used  $\varphi_{C1-C2-O6-C7} = 90^\circ$  (*trans* with respect to the di(2-picolyl)amine (DPA) arm),  $\varphi_{C2-O6-C7-C8} = 180^\circ$  (*trans* with respect to the fluorescein backbone), and  $\varphi_{O6-C7-C8-C9} = -90^\circ$ .

With these initial structures, two local minima, confirmed by frequency analyses at the CPCM(H<sub>2</sub>O)-B3LYP/6-31G level, were found for each sensor on the potential energy surface. To estimate better the relative energy of each conformer, free energies were calculated by combining single point calculations at the CPCM(H<sub>2</sub>O)-B3LYP/6-311+G(d,p)//CPCM(H<sub>2</sub>O)-B3LYP/6-31G level with thermal and entropic corrections obtained at the CPCM(H<sub>2</sub>O)-B3LYP/6-31G level.

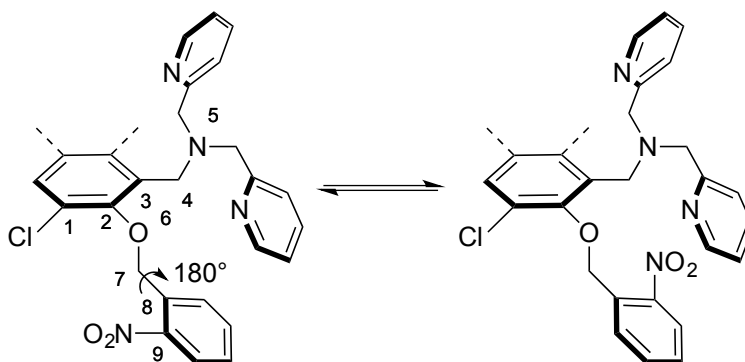

**Scheme S4.** Initial conformations considered in calculations.

To confirm that the 6-31G basis set is suitable for geometry optimization, we also investigated structures of **1** at the CPCM(H<sub>2</sub>O)-B3LYP/6-31G(d) and CPCM(H<sub>2</sub>O)-B3LYP/SVP levels of theory. As shown in Table S4, with the CPCM solvation model, the values of the key dihedral angle  $\varphi_{N5-C4-C3-C2}$  are nearly identical at different levels of theory. Compared to the structures predicted at the CPCM(H<sub>2</sub>O)-B3LYP/6-31G level, slightly smaller  $\varphi_{N5-C4-C3-C2}$  values,  $-73^\circ$  to  $-83^\circ$ , were found at the CPCM(H<sub>2</sub>O)-B3LYP/SVP level. As discussed below, these values are still significantly larger than the corresponding  $\varphi_{N5-C4-C3-C2}$  dihedral angle of ZP1 ( $-33^\circ$ ). We also performed geometry optimization of **1** in the gas phase to test the influence of the implicit CPCM model on the structure of **1**. The effect of the CPCM model is obvious when comparing the structures of **1-a** at the CPCM(H<sub>2</sub>O)-B3LYP/6-31G(d) and B3LYP/6-31G(d) levels. Overall, these results suggested that the 6-31G

basis set, although rather small, is likely to provide reasonable geometric predictions. To balance computational efficiency and accuracy, we performed all calculations at the CPCM(H<sub>2</sub>O)-B3LYP/6-31G(d) level of theory.

**Table S4.** Relative energies and  $\varphi_{\text{N5-C4-C3-C2}}$  of conformers of **1** at different levels of theory.

| level                                 |            | $\Delta E$<br>(kcal/mol) | $\Delta G$<br>(kcal/mol) | $\varphi_{\text{N5-C4-C3-C2}}$<br>(°) |
|---------------------------------------|------------|--------------------------|--------------------------|---------------------------------------|
| CPCM(H <sub>2</sub> O)-B3LYP/6-31G    | <b>1-a</b> | 0.0                      | 0.0                      | -78.9                                 |
|                                       | <b>1-b</b> | 7.8                      | 10.5                     | -83.3                                 |
| CPCM(H <sub>2</sub> O)-B3LYP/6-31G(d) | <b>1-a</b> | 0.0                      | 0.0                      | -76.4                                 |
|                                       | <b>1-b</b> | 7.3                      | 10.6                     | -80.3                                 |
| B3LYP/6-31G(d)                        | <b>1-a</b> | 0.0                      | 0.0                      | -68.2                                 |
|                                       | <b>1-b</b> | 13.8                     | 15.9                     | -82.6                                 |
| CPCM(H <sub>2</sub> O)-B3LYP/SVP      | <b>1-a</b> | 0.0                      | 0.0                      | -72.6                                 |
|                                       | <b>1-b</b> | 8.7                      | 12.0                     | -82.5                                 |
| B3LYP/SVP                             | <b>1-a</b> | 0.0                      | 0.0                      | -69.5                                 |
|                                       | <b>1-b</b> | 14.5                     | 17.5                     | -83.4                                 |

As depicted in Figures S32-S37, the nitro groups of all three sensors point away from the DPA arms in the preferential conformations. As expected, the zinc binding sites of both the major and minor conformers exhibited a significant geometric deviation from the initial ZP1 coordination environment. The calculated dihedral angle  $\varphi_{\text{N5-C4-C3-C2}}$  in the lactone form of ZP1 is 33° (Figure S39). In comparison, this angle ranges from 77° to 85° in the protected sensors. This geometry does not allow for the trigonal bipyramidal zinc-binding mode of ZP1 that was previously determined in X-ray crystallography studies.<sup>11</sup> These results are consistent with our initial hypothesis that the introduction of protecting groups on the oxygen atoms diminishes the zinc binding affinities of the sensors compared to ZP1.

**Table S5.** Energies of conformers of protected ZP1 derivatives at the CPCM(H<sub>2</sub>O)-B3LYP/6-31G level of theory.

|            | <i>E</i><br>(hartree) | $\Delta E$<br>(kcal/mol) | <i>G</i><br>(hartree) | $\Delta G$<br>(kcal/mol) | Thermal Correction<br>(hartree) |
|------------|-----------------------|--------------------------|-----------------------|--------------------------|---------------------------------|
| <b>1-a</b> | -4348.28226382        | 0.0                      | -4347.43646600        | 0.0                      | 0.845797                        |
| <b>1-b</b> | -4348.26987344        | 7.8                      | -4347.41975200        | 10.5                     | 0.850122                        |
| <b>2-a</b> | -4806.22916340        | 0.0                      | -4805.26070100        | 0.0                      | 0.968462                        |
| <b>2-b</b> | -4806.21112366        | 11.3                     | -4805.24488000        | 9.9                      | 0.966244                        |
| <b>3-a</b> | -5022.17118093        | 0.0                      | -5021.32449300        | 0.0                      | 0.846688                        |
| <b>3-b</b> | -5022.17302438        | -1.2                     | -5021.32269600        | 1.1                      | 0.850328                        |

**Table S6.** Energies of conformers of protected ZP1 derivatives at the CPCM(H<sub>2</sub>O)-B3LYP/6-311+G(d,p) level of theory.

|            | <i>E</i><br>(hartree) | $\Delta E$<br>(kcal/mol) | <i>G</i><br>(hartree) | $\Delta G$<br>(kcal/mol) |
|------------|-----------------------|--------------------------|-----------------------|--------------------------|
| <b>1-a</b> | -4350.23524223        | 0.0                      | -4349.38944523        | 0.0                      |
| <b>1-b</b> | -4350.22326838        | 7.5                      | -4349.37314638        | 10.2                     |
| <b>2-a</b> | -4808.46242662        | 0.0                      | -4807.49396462        | 0.0                      |
| <b>2-b</b> | -4808.45270710        | 6.1                      | -4807.48646310        | 4.7                      |
| <b>3-a</b> | -5024.49347851        | 0.0                      | -5023.64679051        | 0.0                      |
| <b>3-b</b> | -5024.49314165        | 0.2                      | -5023.64281365        | 2.5                      |

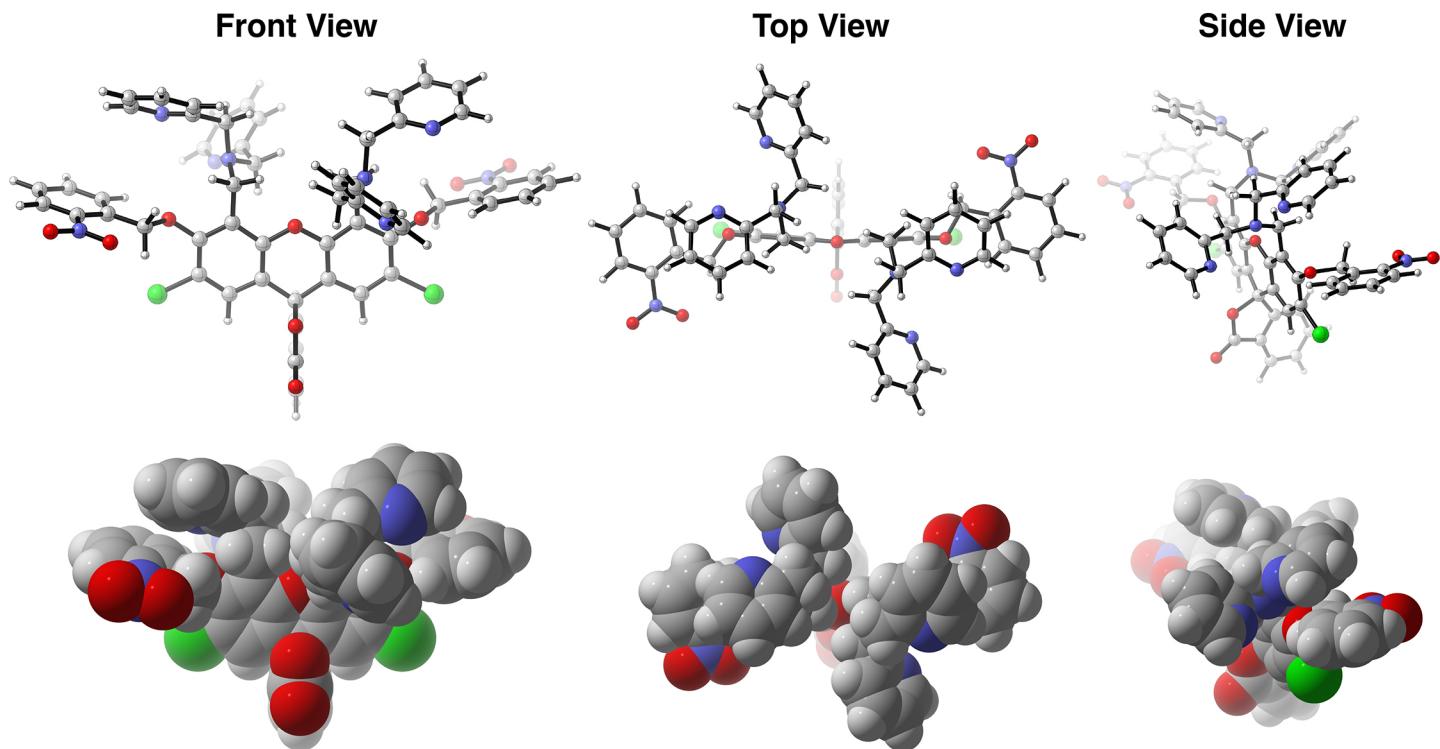

**Figure S32.** Ball and stick (top) and space filling (bottom) models of conformer **1-a** at the CPCM(H<sub>2</sub>O)-B3LYP/6-31G level as viewed from the front, top, and side.

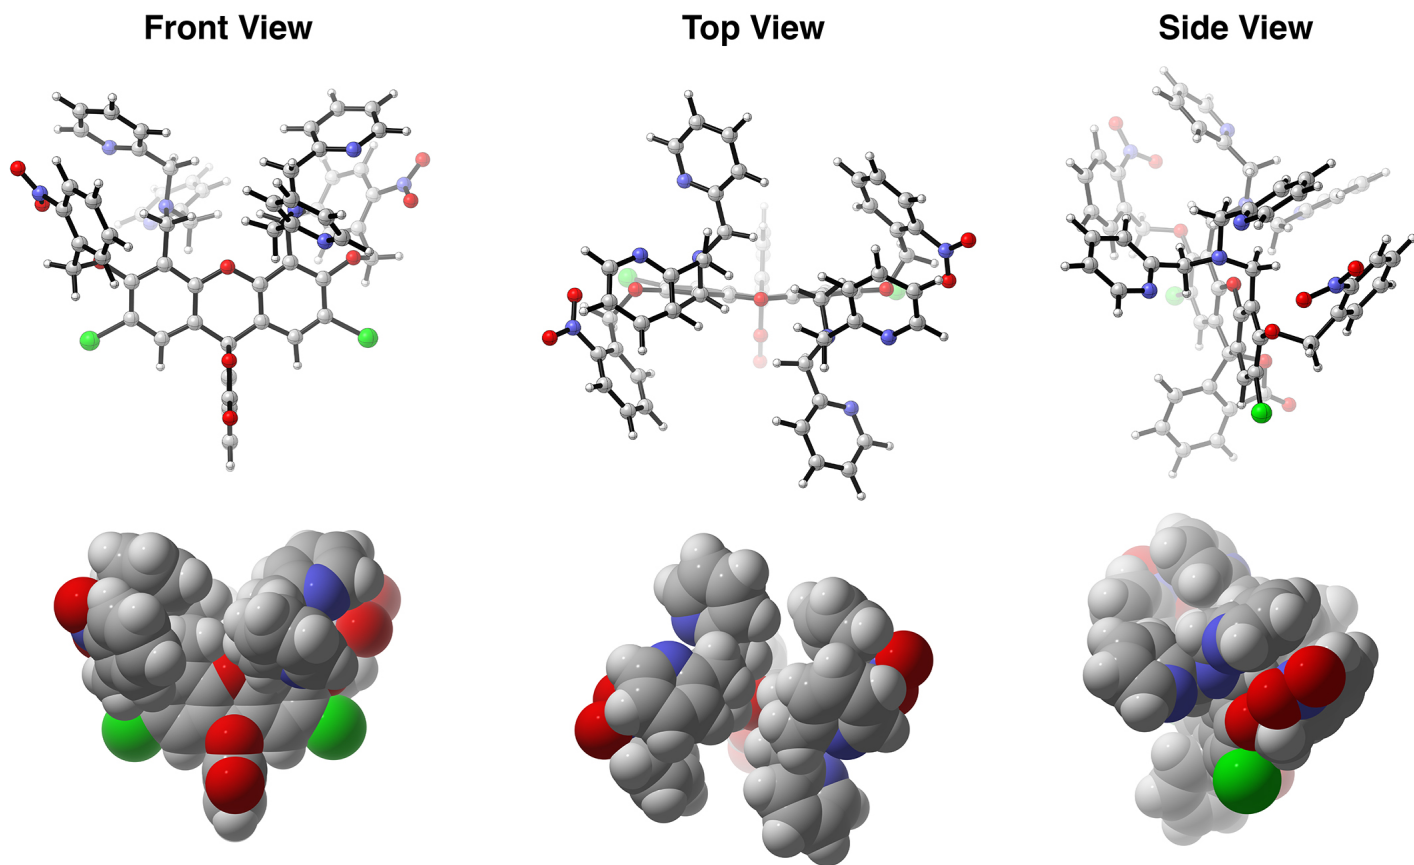

**Figure S33.** Ball and stick (top) and space filling (bottom) models of conformer **1-b** at the CPCM(H<sub>2</sub>O)-B3LYP/6-31G level as viewed from the front, top, and side.

**Front View****Top View****Side View**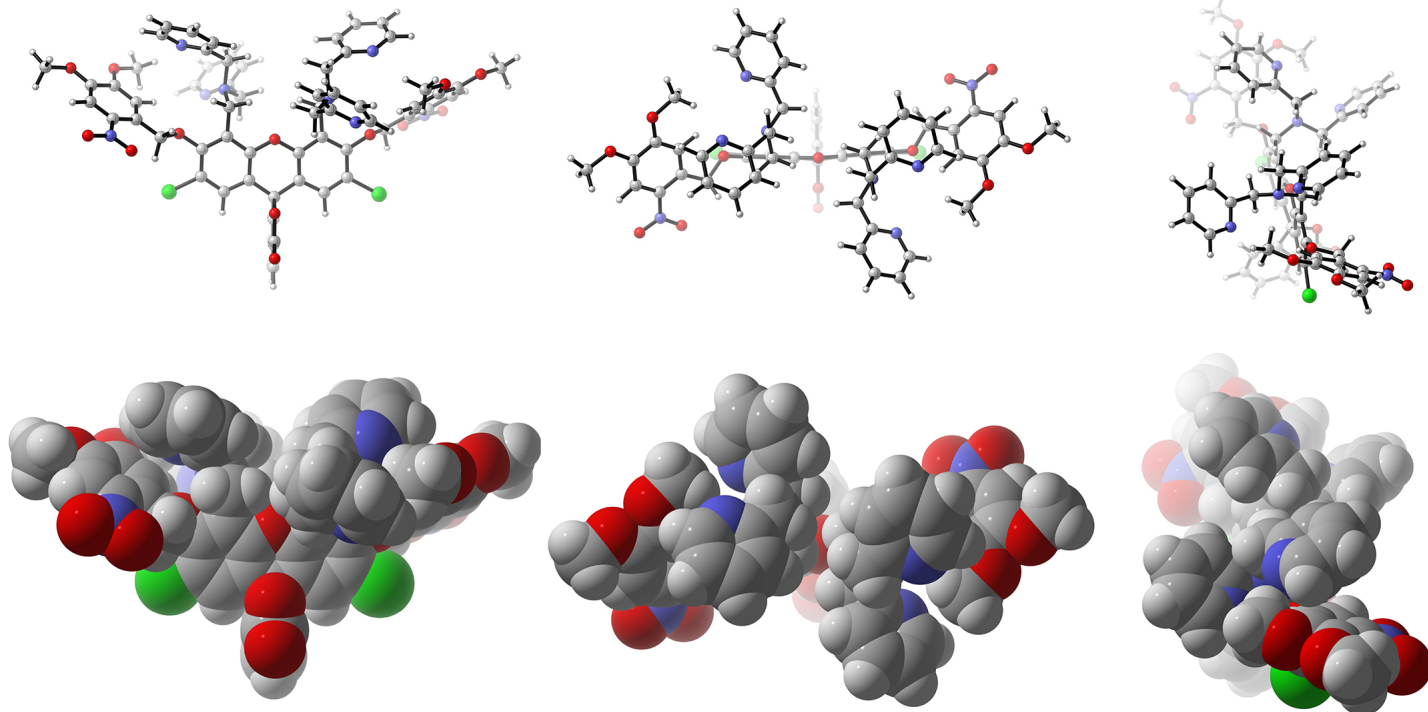

**Figure S34.** Ball and stick (top) and space filling (bottom) models of conformer **2-a** at the CPCM(H<sub>2</sub>O)-B3LYP/6-31G level as viewed from the front, top, and side.

**Front View****Top View****Side View**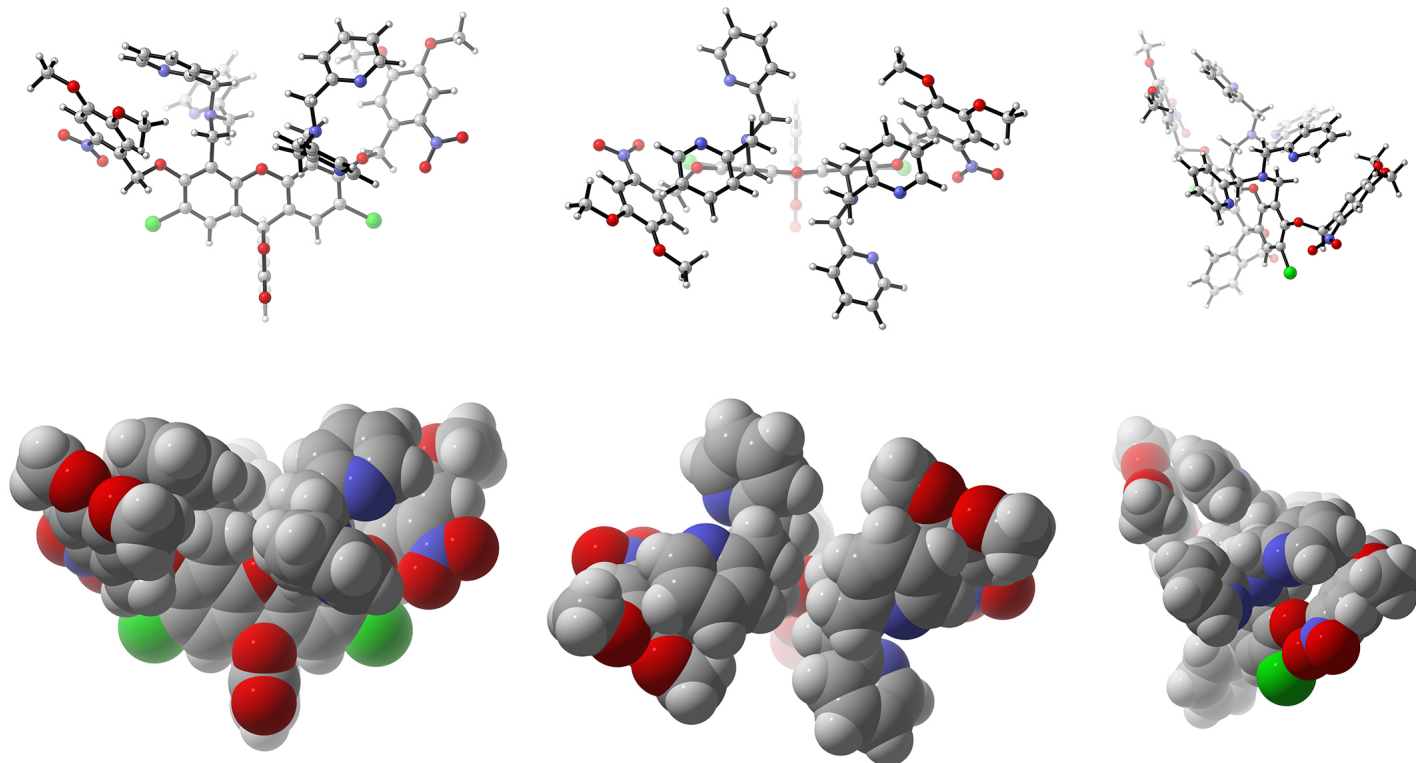

**Figure S35.** Ball and stick (top) and space filling (bottom) models of conformer **2-b** at the CPCM(H<sub>2</sub>O)-B3LYP/6-31G level as viewed from the front, top, and side.

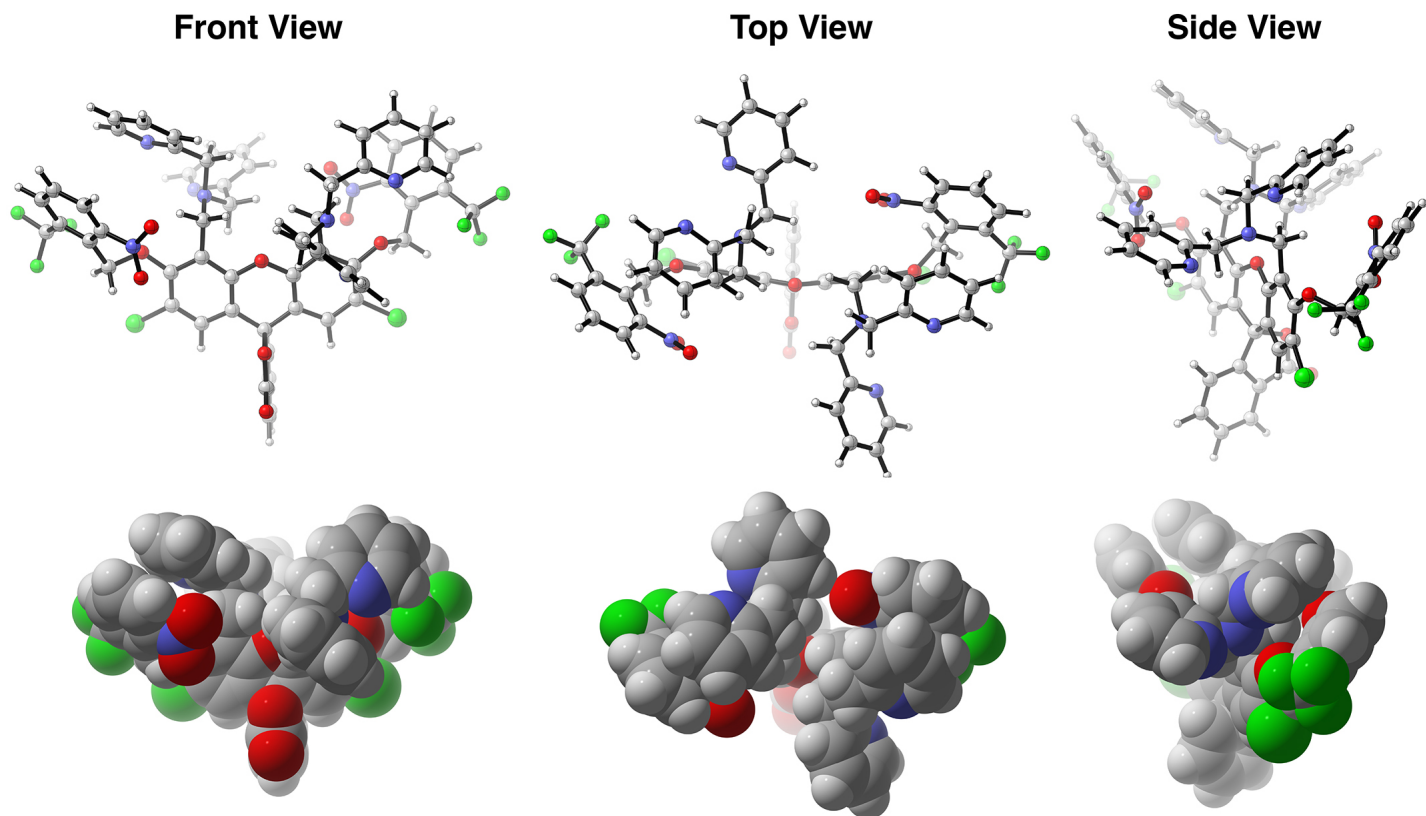

**Figure S36.** Ball and stick (top) and space filling (bottom) models of conformer **3-a** at the CPCM(H<sub>2</sub>O)-B3LYP/6-31G level as viewed from the front, top, and side.

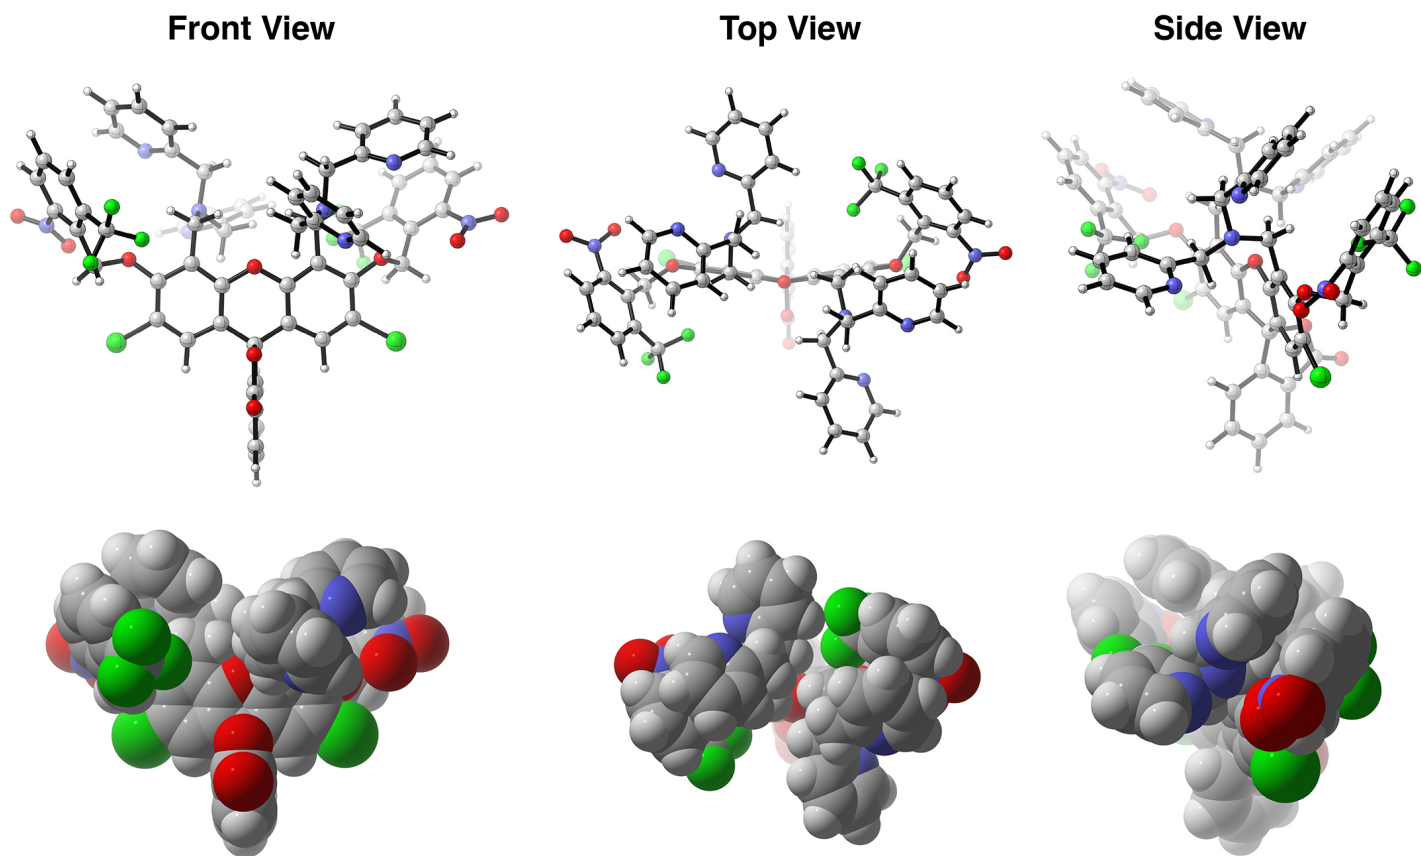

**Figure S37.** Ball and stick (top) and space filling (bottom) models of conformer **3-b** at the CPCM(H<sub>2</sub>O)-B3LYP/6-31G level as viewed from the front, top, and side.



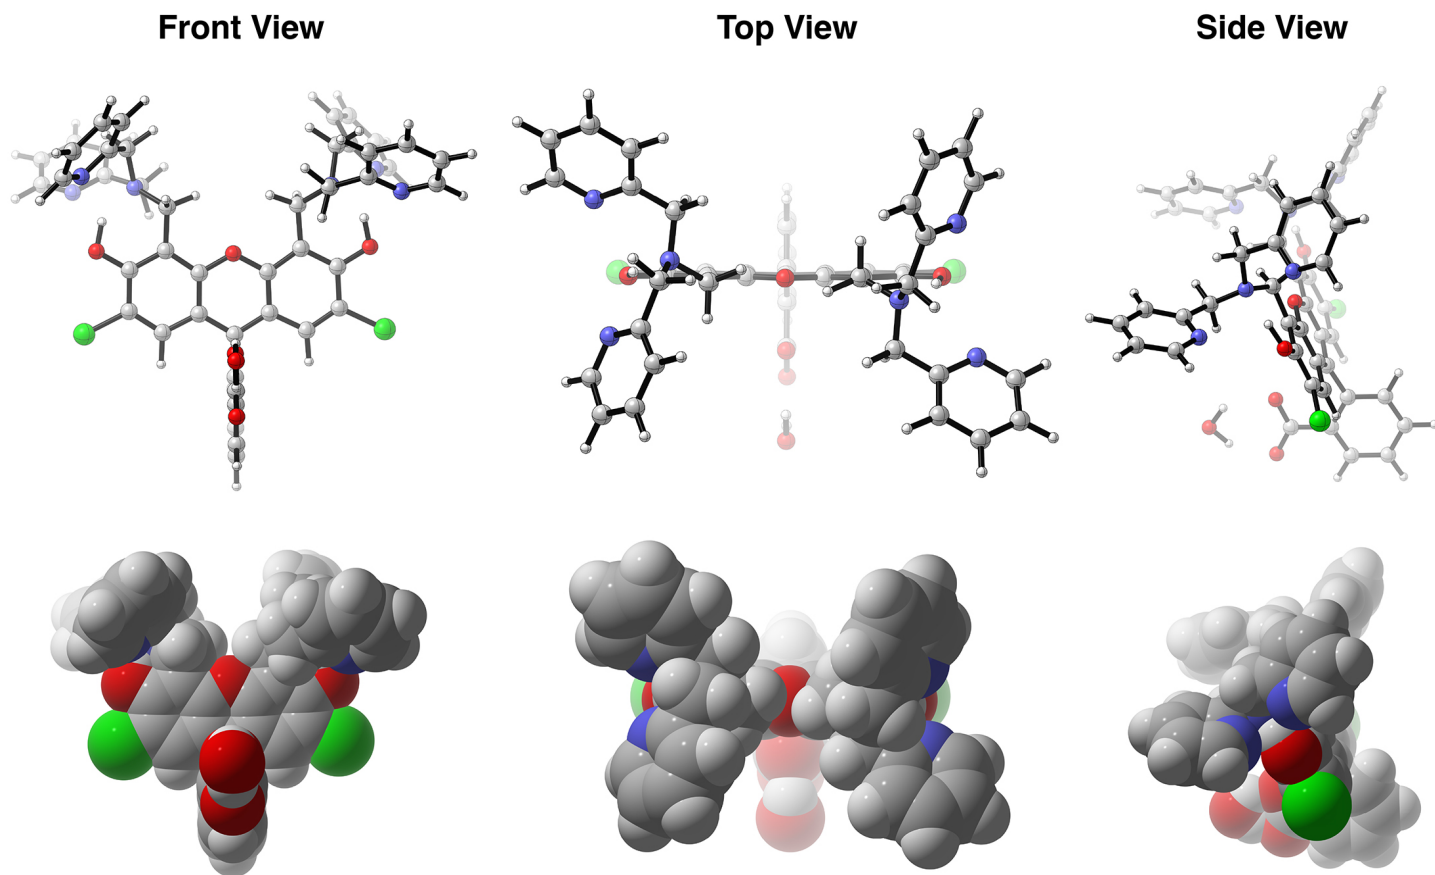

**Figure S38.** Ball and stick (top) and space filling (bottom) models of ZP1 as viewed from the front, top, and side.

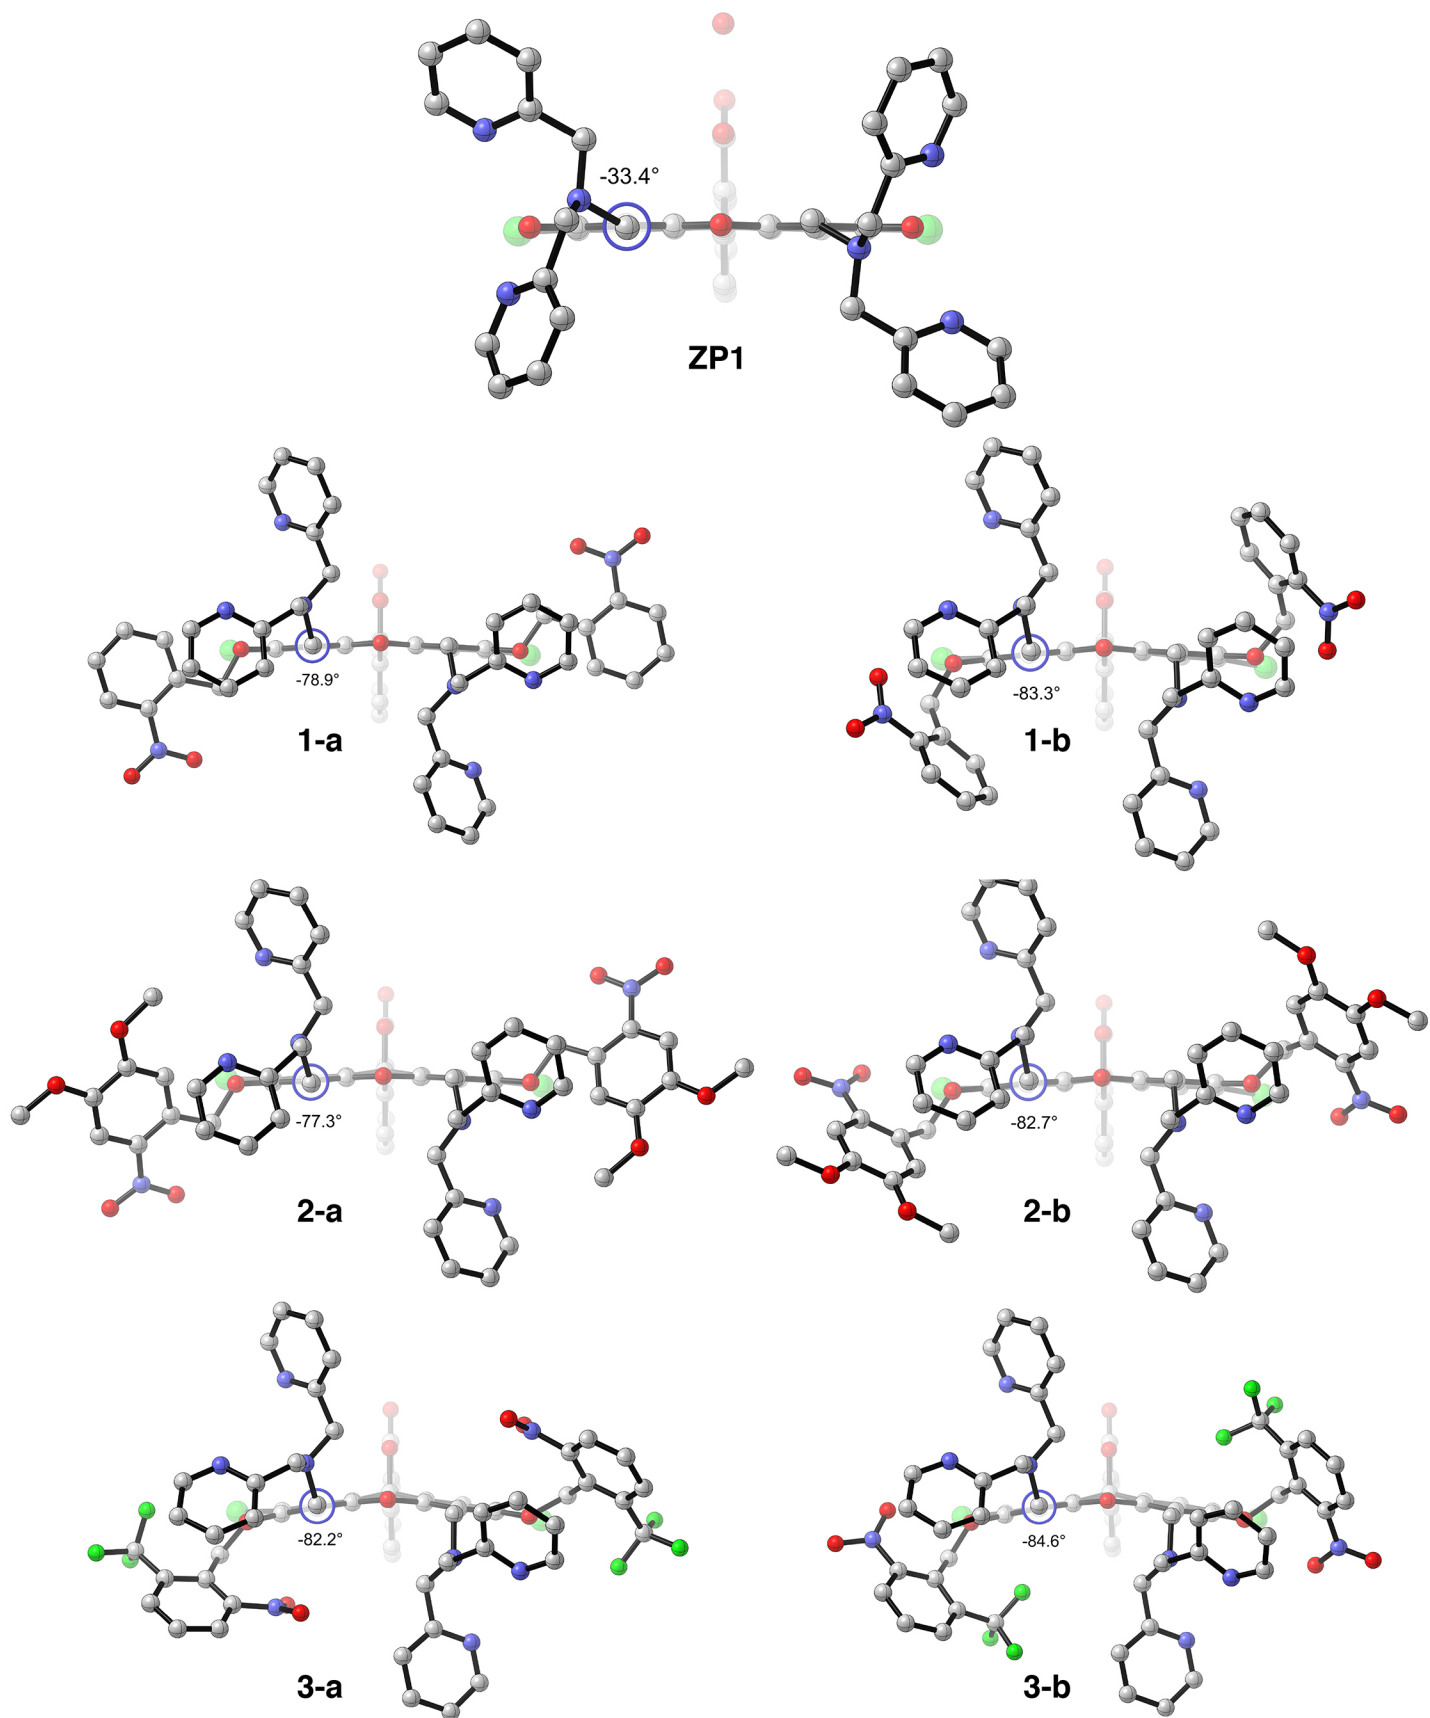

**Figure S39.** Orientation of the DPA arms in ZP1 and protected sensors. Dihedral angles ( $\phi_{N5-C4-C3-C2}$ ) of the protected sensors calculated at the CPCM(H<sub>2</sub>O)-B3LYP/6-31G level are indicated.

CPCM(H<sub>2</sub>O)-B3LYP/6-31G

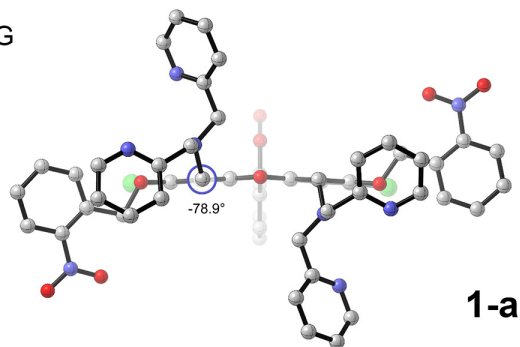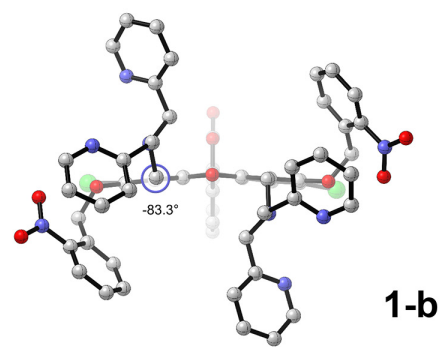

CPCM(H<sub>2</sub>O)-B3LYP/6-31G(d)

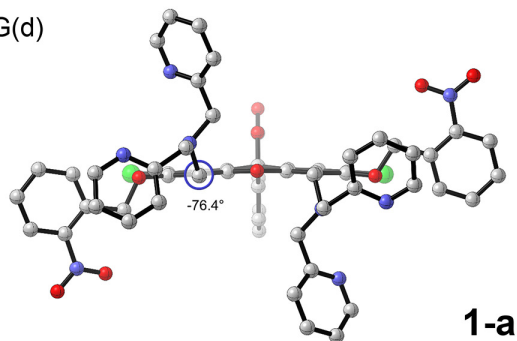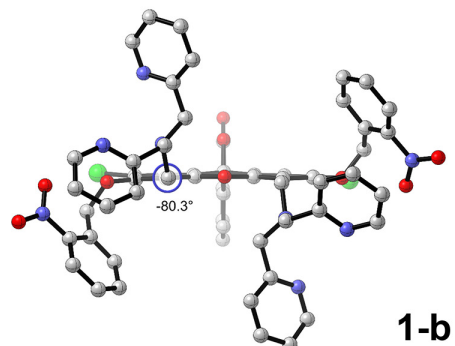

B3LYP/6-31G(d)

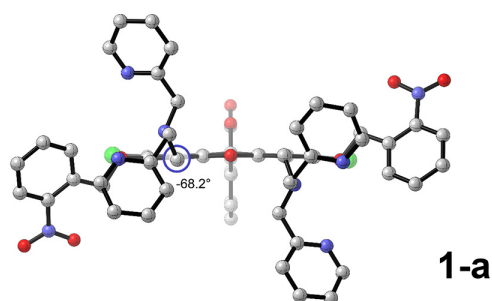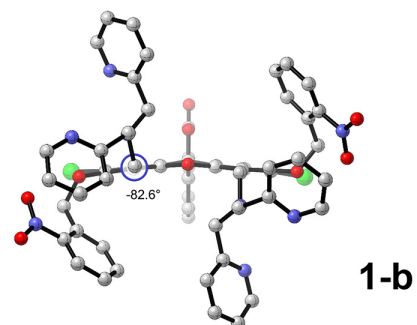

CPCM(H<sub>2</sub>O)-B3LYP/SVP

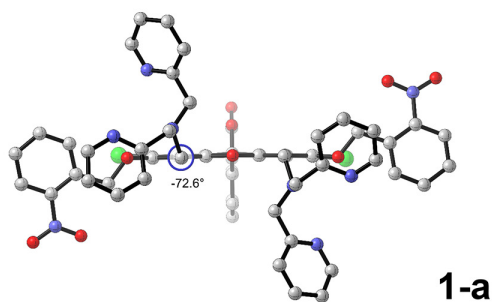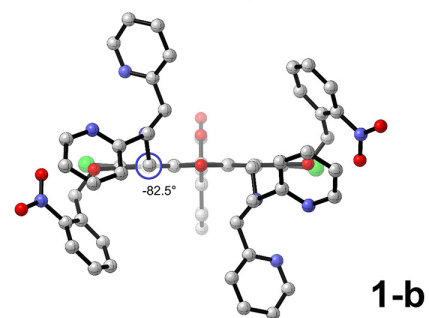

B3LYP/SVP

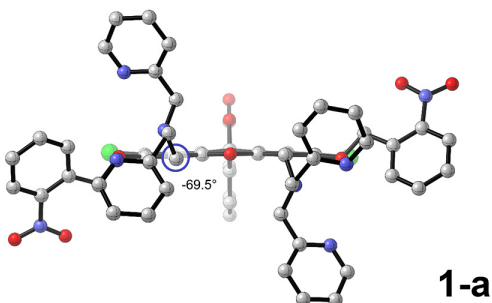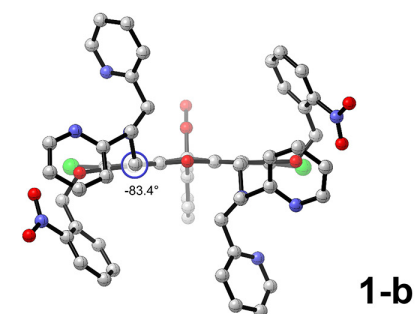

**Figure S40.** Comparison of **1-a** and **1-b** dihedral angles ( $\phi_{N5-C4-C3-C2}$ ) calculated at different levels of theory, as indicated.

# Optimized Coordinates of 1-a at the CPCM(H<sub>2</sub>O)-B3LYP/6-31G level.

| Standard orientation: |               |             |                         | 62        | 6         | 0   | -6.205859 | -3.915937 | 0.809963   |           |           |
|-----------------------|---------------|-------------|-------------------------|-----------|-----------|-----|-----------|-----------|------------|-----------|-----------|
| Center Number         | Atomic Number | Atomic Type | Coordinates (Angstroms) |           |           |     |           |           |            |           |           |
|                       |               |             | X                       | Y         | Z         |     |           |           |            |           |           |
| 1                     | 17            | 0           | 5.285626                | 3.298677  | -0.389743 | 63  | 6         | 0         | -1.558707  | -1.258613 | 2.572005  |
| 2                     | 17            | 0           | -5.240608               | 3.372817  | 0.254065  | 64  | 6         | 0         | -2.049543  | -1.543190 | 3.975488  |
| 3                     | 8             | 0           | 4.773524                | 0.297714  | -0.284044 | 65  | 6         | 0         | -1.417157  | -2.485403 | 4.799633  |
| 4                     | 8             | 0           | 0.020383                | 0.550539  | 0.211874  | 66  | 6         | 0         | -1.897763  | -2.697700 | 6.097639  |
| 5                     | 8             | 0           | -4.760486               | 0.362895  | 0.203945  | 67  | 6         | 0         | -3.000509  | -1.960170 | 6.538787  |
| 6                     | 6             | 0           | 0.133081                | 5.346318  | 1.852696  | 68  | 6         | 0         | -3.576160  | -1.035177 | 5.660474  |
| 7                     | 1             | 0           | 0.095970                | 7.998859  | 0.743421  | 69  | 1         | 0         | 3.092062   | -1.496903 | 0.574384  |
| 8                     | 1             | 0           | -0.022542               | 8.425068  | -1.721881 | 70  | 1         | 0         | 1.334110   | -1.397582 | 0.429703  |
| 9                     | 1             | 0           | -0.112587               | 6.529595  | -3.309973 | 71  | 1         | 0         | 1.324515   | -0.141324 | -2.250559 |
| 10                    | 1             | 0           | -0.087210               | 4.180094  | -2.498703 | 72  | 1         | 0         | 0.439749   | -1.675076 | -2.199882 |
| 11                    | 1             | 0           | 2.620606                | 4.320861  | -0.059513 | 73  | 1         | 0         | 0.305330   | -2.918512 | -4.238447 |
| 12                    | 1             | 0           | -2.541111               | 4.356965  | 0.244118  | 74  | 1         | 0         | 1.057357   | -3.264960 | -6.600078 |
| 13                    | 8             | 0           | 0.119734                | 3.949740  | 1.801464  | 75  | 1         | 0         | 3.048753   | -1.974611 | -7.434505 |
| 14                    | 8             | 0           | 0.190221                | 5.950739  | 2.926718  | 76  | 1         | 0         | 4.188196   | -0.395617 | -5.866117 |
| 15                    | 6             | 0           | 0.069380                | 5.854073  | 0.475074  | 77  | 1         | 0         | 2.504734   | -3.530524 | -2.361446 |
| 16                    | 6             | 0           | 0.056039                | 7.179590  | 0.034531  | 78  | 1         | 0         | 1.623750   | -3.589638 | -0.823556 |
| 17                    | 6             | 0           | -0.010268               | 7.409412  | -1.343247 | 79  | 1         | 0         | -3.050785  | -1.443887 | -0.473711 |
| 18                    | 6             | 0           | -0.061402               | 6.331099  | -2.245084 | 80  | 1         | 0         | -1.304783  | -1.373718 | -0.209826 |
| 19                    | 6             | 0           | -0.047302               | 5.002769  | -1.793560 | 81  | 1         | 0         | -2.676352  | -3.536172 | 2.452728  |
| 20                    | 6             | 0           | 0.018873                | 4.779934  | -0.419381 | 82  | 1         | 0         | -1.756196  | -3.584505 | 0.937210  |
| 21                    | 6             | 0           | 0.046704                | 3.458697  | 0.337176  | 83  | 1         | 0         | -2.898832  | -4.277022 | -1.075875 |
| 22                    | 6             | 0           | 1.287556                | 2.629424  | 0.106703  | 84  | 1         | 0         | -7.177023  | -4.819430 | -0.894035 |
| 23                    | 6             | 0           | 2.541638                | 3.241833  | -0.039117 | 85  | 1         | 0         | -7.117380  | -3.797029 | 1.386574  |
| 24                    | 6             | 0           | 3.680625                | 2.466056  | -0.158574 | 86  | 1         | 0         | -1.420269  | -0.178802 | 2.479076  |
| 25                    | 6             | 0           | 3.622508                | 1.062347  | -0.134700 | 87  | 1         | 0         | -0.571280  | -1.731679 | 2.422301  |
| 26                    | 6             | 0           | 2.378789                | 0.418996  | -0.023516 | 88  | 7         | 0         | -3.118245  | -0.822795 | 4.406883  |
| 27                    | 6             | 0           | 1.233576                | 1.230224  | 0.101413  | 89  | 6         | 0         | 3.721165   | -4.320181 | 0.590615  |
| 28                    | 6             | 0           | -1.188076               | 1.247432  | 0.215420  | 90  | 1         | 0         | 2.773876   | -4.428159 | 1.107683  |
| 29                    | 6             | 0           | -2.351009               | 0.452405  | 0.197864  | 91  | 7         | 0         | 4.931628   | -3.538614 | -1.342118 |
| 30                    | 6             | 0           | -3.590379               | 1.113165  | 0.182934  | 92  | 1         | 0         | 4.886729   | -5.304226 | 2.122344  |
| 31                    | 6             | 0           | -3.631575               | 2.517552  | 0.202061  | 93  | 1         | 0         | -5.014859  | -5.062363 | -2.156074 |
| 32                    | 6             | 0           | -2.475621               | 3.277018  | 0.221091  | 94  | 6         | 0         | -5.524959  | 0.262792  | -1.060672 |
| 33                    | 6             | 0           | -1.221760               | 2.647062  | 0.223576  | 95  | 1         | 0         | -5.487928  | 1.218385  | -1.587812 |
| 34                    | 6             | 0           | 2.282813                | -1.090949 | -0.037226 | 96  | 1         | 0         | -5.042692  | -0.487285 | -1.692993 |
| 35                    | 6             | 0           | 1.431718                | -1.221452 | -2.378223 | 97  | 6         | 0         | 5.665872   | 0.181658  | 0.892093  |
| 36                    | 6             | 0           | 1.856013                | -1.480407 | -3.808679 | 98  | 1         | 0         | 5.681687   | 1.128690  | 1.435429  |
| 37                    | 6             | 0           | 1.161433                | -2.380005 | -4.630247 | 99  | 1         | 0         | 5.253726   | -0.579630 | 1.559565  |
| 38                    | 6             | 0           | 1.582575                | -2.571924 | -5.951827 | 100 | 6         | 0         | -6.946652  | -0.123581 | -0.720894 |
| 39                    | 6             | 0           | 2.689668                | -1.857151 | -6.418639 | 101 | 6         | 0         | -7.953728  | -0.342833 | -1.692067 |
| 40                    | 6             | 0           | 3.329501                | -0.974599 | -5.541019 | 102 | 6         | 0         | -7.320643  | -0.283559 | 0.622392  |
| 41                    | 6             | 0           | 2.511940                | -3.166658 | -1.329934 | 103 | 6         | 0         | -9.263675  | -0.700511 | -1.338337 |
| 42                    | 6             | 0           | 3.765483                | -3.686574 | -0.660102 | 104 | 6         | 0         | -8.623941  | -0.638762 | 0.983274  |
| 43                    | 1             | 0           | 6.977097                | -3.876259 | -1.365430 | 105 | 1         | 0         | -6.568063  | -0.128644 | 1.381944  |
| 44                    | 1             | 0           | 7.041333                | -5.023834 | 0.854920  | 106 | 6         | 0         | -9.601706  | -0.848868 | 0.002522  |
| 45                    | 1             | 0           | -0.562377               | -3.040304 | 4.428315  | 107 | 1         | 0         | -9.992156  | -0.854068 | -2.122225 |
| 46                    | 1             | 0           | -1.420931               | -3.423277 | 6.747670  | 108 | 1         | 0         | -8.874168  | -0.750888 | 2.032423  |
| 47                    | 1             | 0           | -3.404282               | -2.092112 | 7.535924  | 109 | 1         | 0         | -10.612558 | -1.123905 | 0.278477  |
| 48                    | 1             | 0           | -4.429003               | -0.437415 | 5.966445  | 110 | 7         | 0         | -7.681022  | -0.204517 | -3.113495 |
| 49                    | 7             | 0           | 2.436603                | -1.686084 | -1.392468 | 111 | 8         | 0         | -8.612325  | -0.426730 | -3.944926 |
| 50                    | 7             | 0           | -2.530333               | -1.671341 | 1.529416  | 112 | 8         | 0         | -6.513679  | 0.136395  | -3.486471 |
| 51                    | 7             | 0           | 2.929488                | -0.782281 | -4.264569 | 113 | 6         | 0         | 7.045618   | -0.195139 | 0.401444  |
| 52                    | 7             | 0           | -5.067408               | -3.486728 | 1.398533  | 114 | 6         | 0         | 8.150924   | -0.414356 | 1.259034  |
| 53                    | 6             | 0           | 6.068824                | -4.014790 | -0.788033 | 115 | 6         | 0         | 7.275615   | -0.346313 | -0.974935 |
| 54                    | 6             | 0           | 6.103403                | -4.656320 | 0.455028  | 116 | 6         | 0         | 9.417613   | -0.763210 | 0.766260  |
| 55                    | 6             | 0           | 4.903794                | -4.811352 | 1.156361  | 117 | 6         | 0         | 8.534879   | -0.692927 | -1.474074 |
| 56                    | 6             | 0           | -2.278730               | -1.058867 | 0.196058  | 118 | 1         | 0         | 6.446100   | -0.190566 | -1.649378 |
| 57                    | 6             | 0           | -2.645209               | -3.148733 | 1.430643  | 119 | 6         | 0         | 9.612117   | -0.903098 | -0.603667 |
| 58                    | 6             | 0           | -3.896894               | -3.615000 | 0.719880  | 120 | 1         | 0         | 10.225809  | -0.917052 | 1.467571  |
| 59                    | 6             | 0           | -3.849537               | -4.180985 | -0.562743 | 121 | 1         | 0         | 8.672900   | -0.798223 | -2.544457 |
| 60                    | 6             | 0           | -5.033981               | -4.622292 | -1.164958 | 122 | 1         | 0         | 10.589174  | -1.171747 | -0.986794 |
| 61                    | 6             | 0           | -6.237800               | -4.488052 | -0.466592 | 123 | 7         | 0         | 8.030250   | -0.284872 | 2.702171  |
|                       |               |             |                         |           |           | 124 | 8         | 0         | 9.047755   | -0.498635 | 3.428108  |
|                       |               |             |                         |           |           | 125 | 8         | 0         | 6.905452   | 0.039641  | 3.199654  |

**Optimized Coordinates of 1-b at the CPCM(H<sub>2</sub>O)-B3LYP/6-31G level.**

| Standard orientation: |        |        |                         | 62        | 6         | 0   | -5.615761 | -4.018915 | 1.560139  |           |           |
|-----------------------|--------|--------|-------------------------|-----------|-----------|-----|-----------|-----------|-----------|-----------|-----------|
| Center                | Atomic | Atomic | Coordinates (Angstroms) |           |           | 63  | 6         | 0         | -1.416710 | -0.487881 | 2.775274  |
| Number                | Number | Type   | X                       | Y         | Z         | 64  | 6         | 0         | -1.854605 | -0.682346 | 4.211793  |
|                       |        |        |                         |           |           | 65  | 6         | 0         | -1.112775 | -1.465145 | 5.108425  |
|                       |        |        |                         |           |           | 66  | 6         | 0         | -1.552493 | -1.601769 | 6.430837  |
|                       |        |        |                         |           |           | 67  | 6         | 0         | -2.724143 | -0.948399 | 6.824116  |
| 1                     | 17     | 0      | 5.268433                | 3.552205  | -1.085668 | 68  | 6         | 0         | -3.407369 | -0.179844 | 5.874870  |
| 2                     | 17     | 0      | -5.151692               | 3.788684  | 0.267125  | 69  | 1         | 0         | 3.159559  | -1.195219 | 0.325729  |
| 3                     | 8      | 0      | 4.787492                | 0.553520  | -0.553504 | 70  | 1         | 0         | 1.404063  | -1.028820 | 0.484019  |
| 4                     | 8      | 0      | 0.076140                | 0.911555  | 0.202668  | 71  | 1         | 0         | 1.280878  | 0.284584  | -2.341431 |
| 5                     | 8      | 0      | -4.705010               | 0.739661  | 0.210887  | 72  | 1         | 0         | 0.125863  | -1.038221 | -2.115303 |
| 6                     | 6      | 0      | 0.324171                | 5.737759  | 1.592626  | 73  | 1         | 0         | -0.478426 | -2.278589 | -4.054696 |
| 7                     | 1      | 0      | 0.247724                | 8.361040  | 0.417071  | 74  | 1         | 0         | -0.067827 | -2.858338 | -6.454196 |
| 8                     | 1      | 0      | -0.013726               | 8.724562  | -2.047152 | 75  | 1         | 0         | 2.053186  | -2.057599 | -7.543955 |
| 9                     | 1      | 0      | -0.215607               | 6.789809  | -3.576537 | 76  | 1         | 0         | 3.658587  | -0.710736 | -6.180095 |
| 10                    | 1      | 0      | -0.163392               | 4.461639  | -2.705424 | 77  | 1         | 0         | 1.711980  | -3.254109 | -2.364446 |
| 11                    | 1      | 0      | 2.666101                | 4.613743  | -0.572718 | 78  | 1         | 0         | 1.077515  | -3.096370 | -0.716768 |
| 12                    | 1      | 0      | -2.458968               | 4.730044  | 0.099360  | 79  | 1         | 0         | -3.034118 | -1.131559 | -0.155724 |
| 13                    | 8      | 0      | 0.291079                | 4.341101  | 1.580079  | 80  | 1         | 0         | -1.269516 | -1.024038 | -0.055091 |
| 14                    | 8      | 0      | 0.451032                | 6.370014  | 2.644598  | 81  | 1         | 0         | -2.125486 | -2.894328 | 2.935319  |
| 15                    | 6      | 0      | 0.185784                | 6.210411  | 0.207817  | 82  | 1         | 0         | -1.280009 | -2.970787 | 1.379789  |
| 16                    | 6      | 0      | 0.158395                | 7.524103  | -0.266221 | 83  | 1         | 0         | -2.325169 | -4.208145 | -0.379481 |
| 17                    | 6      | 0      | 0.012003                | 7.718941  | -1.643262 | 84  | 1         | 0         | -6.450132 | -5.383383 | 0.108989  |
| 18                    | 6      | 0      | -0.102630               | 6.618415  | -2.511731 | 85  | 1         | 0         | -6.526690 | -3.932264 | 2.143370  |
| 19                    | 6      | 0      | -0.073727               | 5.302190  | -2.026571 | 86  | 1         | 0         | -1.436791 | 0.583198  | 2.566360  |
| 20                    | 6      | 0      | 0.072208                | 5.114328  | -0.653404 | 87  | 1         | 0         | -0.373227 | -0.829893 | 2.657813  |
| 21                    | 6      | 0      | 0.129645                | 3.813226  | 0.133948  | 88  | 7         | 0         | -2.990384 | -0.042564 | 4.596771  |
| 22                    | 6      | 0      | 1.344522                | 2.961120  | -0.141955 | 89  | 6         | 0         | 3.152689  | -4.269174 | 0.392467  |
| 23                    | 6      | 0      | 2.584593                | 3.542267  | -0.446140 | 90  | 1         | 0         | 2.288103  | -4.180885 | 1.041290  |
| 24                    | 6      | 0      | 3.706030                | 2.746074  | -0.593116 | 91  | 7         | 0         | 4.213996  | -3.728972 | -1.703653 |
| 25                    | 6      | 0      | 3.652344                | 1.348356  | -0.429310 | 92  | 1         | 0         | 4.284435  | -5.513915 | 1.750109  |
| 26                    | 6      | 0      | 2.408947                | 0.731929  | -0.196333 | 93  | 1         | 0         | -4.297306 | -5.521841 | -1.184814 |
| 27                    | 6      | 0      | 1.283252                | 1.566493  | -0.043346 | 94  | 6         | 0         | -5.586879 | 0.813231  | -1.003536 |
| 28                    | 6      | 0      | -1.128350               | 1.615854  | 0.191920  | 95  | 1         | 0         | -6.596424 | 0.778833  | 0.609606  |
| 29                    | 6      | 0      | -2.295536               | 0.827554  | 0.251026  | 96  | 1         | 0         | -5.419076 | 1.768469  | -1.500351 |
| 30                    | 6      | 0      | -3.534848               | 1.491380  | 0.193102  | 97  | 6         | 0         | 5.866971  | 0.733714  | 0.475456  |
| 31                    | 6      | 0      | -3.560509               | 2.899190  | 0.163028  | 98  | 1         | 0         | 6.787065  | 0.546671  | -0.066840 |
| 32                    | 6      | 0      | -2.399855               | 3.649693  | 0.118441  | 99  | 1         | 0         | 5.849954  | 1.766107  | 0.823671  |
| 33                    | 6      | 0      | -1.150051               | 3.012567  | 0.111888  | 100 | 6         | 0         | -5.287328 | -0.308279 | -1.967982 |
| 34                    | 6      | 0      | 2.269999                | -0.772744 | -0.145773 | 101 | 6         | 0         | -5.921873 | -1.571437 | -1.980390 |
| 35                    | 6      | 0      | 1.163557                | -0.799090 | -2.407554 | 102 | 6         | 0         | -4.328393 | -0.075375 | -2.968890 |
| 36                    | 6      | 0      | 1.378597                | -1.196882 | -3.853350 | 103 | 6         | 0         | -5.624308 | -2.542520 | -2.945436 |
| 37                    | 6      | 0      | 0.427086                | -1.952120 | -4.554741 | 104 | 6         | 0         | -4.000573 | -1.046079 | -3.920929 |
| 38                    | 6      | 0      | 0.657188                | -2.274139 | -5.897903 | 105 | 1         | 0         | -3.841837 | 0.893151  | -3.005707 |
| 39                    | 6      | 0      | 1.835431                | -1.831584 | -6.506532 | 106 | 6         | 0         | -4.652553 | -2.284587 | -3.910569 |
| 40                    | 6      | 0      | 2.735606                | -1.079338 | -5.743562 | 107 | 1         | 0         | -6.150123 | -3.486816 | -2.920748 |
| 41                    | 6      | 0      | 1.947110                | -2.876623 | -1.364972 | 108 | 1         | 0         | -3.248015 | -0.831668 | -4.671110 |
| 42                    | 6      | 0      | 3.152339                | -3.639029 | -0.860428 | 109 | 1         | 0         | -4.411824 | -3.041131 | -4.647651 |
| 43                    | 1      | 0      | 6.118125                | -4.488179 | -2.012958 | 110 | 7         | 0         | -6.945721 | -1.932039 | -1.002826 |
| 44                    | 1      | 0      | 6.247207                | -5.673062 | 0.184751  | 111 | 8         | 0         | -7.754680 | -2.863065 | -1.297446 |
| 45                    | 1      | 0      | -0.205426               | -1.956134 | 4.773605  | 112 | 8         | 0         | -6.984429 | -1.327751 | 0.110579  |
| 46                    | 1      | 0      | -0.991351               | -2.205001 | 7.136252  | 113 | 6         | 0         | 5.672375  | -0.192168 | 1.651151  |
| 47                    | 1      | 0      | -3.099455               | -1.025846 | 7.837948  | 114 | 6         | 0         | 6.212599  | -1.493368 | 1.768418  |
| 48                    | 1      | 0      | -4.316361               | 0.350149  | 6.141567  | 115 | 6         | 0         | 4.927628  | 0.281544  | 2.744774  |
| 49                    | 7      | 0      | 2.156097                | -1.413695 | -1.491663 | 116 | 6         | 0         | 6.027094  | -2.274012 | 2.916882  |
| 50                    | 7      | 0      | -2.329252               | -1.151506 | 1.808474  | 117 | 6         | 0         | 4.711898  | -0.496881 | 3.886439  |
| 51                    | 7      | 0      | 2.521093                | -0.762458 | -4.447462 | 118 | 1         | 0         | 4.522431  | 1.286448  | 2.700235  |
| 52                    | 7      | 0      | -4.552618               | -3.313811 | 2.005396  | 119 | 6         | 0         | 5.264508  | -1.779737 | 3.973626  |
| 53                    | 6      | 0      | 5.291520                | -4.443666 | -1.311472 | 120 | 1         | 0         | 6.474597  | -3.257146 | 2.963065  |
| 54                    | 6      | 0      | 5.362805                | -5.106353 | -0.800612 | 121 | 1         | 0         | 4.124712  | -0.098581 | 4.705942  |
| 55                    | 6      | 0      | 4.269926                | -5.014835 | 0.787270  | 122 | 1         | 0         | 5.108616  | -2.388718 | 4.855968  |
| 56                    | 6      | 0      | -2.210722               | -0.674848 | 0.396692  | 123 | 7         | 0         | 7.020425  | -2.092500 | 0.708623  |
| 57                    | 6      | 0      | -2.207390               | -2.628925 | 1.877376  | 124 | 8         | 0         | 7.809802  | -3.035717 | 1.017472  |
| 58                    | 6      | 0      | -3.387784               | -3.385140 | 1.308815  | 125 | 8         | 0         | 6.896679  | -1.674390 | -0.481303 |
| 59                    | 6      | 0      | -3.269474               | -4.169932 | 0.152680  |     |           |           |           |           |           |
| 60                    | 6      | 0      | -4.373468               | -4.904567 | -0.296288 |     |           |           |           |           |           |
| 61                    | 6      | 0      | -5.571933               | -4.830753 | 0.420673  |     |           |           |           |           |           |

*Optimized Coordinates of 2-a at the CPCM(H<sub>2</sub>O)-B3LYP/6-31G level.*

| Standard orientation: |        |        |                               | 70    | 1 | 0 | 1.325184   | -0.927333 | 0.563481  |  |  |
|-----------------------|--------|--------|-------------------------------|-------|---|---|------------|-----------|-----------|--|--|
| -----                 |        |        |                               | 71    | 1 | 0 | 1.747397   | 0.319611  | -2.204096 |  |  |
| Center                | Atomic | Atomic | Coordinates (Angstroms)       | 72    | 1 | 0 | 0.679305   | -1.093650 | -2.227666 |  |  |
| Number                | Number | Type   | X Y Z                         | 73    | 1 | 0 | 0.644355   | -2.392691 | -4.229393 |  |  |
| -----                 |        |        |                               | 74    | 1 | 0 | 1.628918   | -2.920783 | -6.468393 |  |  |
| -----                 |        |        |                               | 75    | 1 | 0 | 3.851540   | -1.912725 | -7.077859 |  |  |
| 1                     | 17     | 0      | 5.283023 3.767934 -0.260097   | 76    | 1 | 0 | 4.980713   | -0.424661 | -5.416590 |  |  |
| 2                     | 17     | 0      | -5.250273 3.772903 0.067905   | 77    | 1 | 0 | 2.470295   | -3.194131 | -2.059597 |  |  |
| 3                     | 8      | 0      | 4.794505 0.753770 -0.032251   | 78    | 1 | 0 | 1.384459   | -3.044042 | -0.664811 |  |  |
| 4                     | 8      | 0      | 0.024970 0.980967 0.199276    | 79    | 1 | 0 | -2.957143  | -1.029053 | -0.700619 |  |  |
| 5                     | 8      | 0      | -4.742772 0.750224 -0.015068  | 80    | 1 | 0 | -1.239188  | -0.928500 | -0.298633 |  |  |
| 6                     | 6      | 0      | 0.039453 5.815890 1.753377    | 81    | 1 | 0 | -2.587953  | -3.185046 | 2.234917  |  |  |
| 7                     | 1      | 0      | 0.025470 8.441236 0.578613    | 82    | 1 | 0 | -1.424460  | -3.054316 | 0.901886  |  |  |
| 8                     | 1      | 0      | -0.000268 8.806187 -1.899110  | 83    | 1 | 0 | -2.065530  | -3.835031 | -1.287611 |  |  |
| 9                     | 1      | 0      | -0.014078 6.872135 -3.442467  | 84    | 1 | 0 | -6.122392  | -5.206274 | -1.825085 |  |  |
| 10                    | 1      | 0      | -0.002896 4.542751 -2.572582  | 85    | 1 | 0 | -6.641732  | -4.261312 | 0.432696  |  |  |
| 11                    | 1      | 0      | 2.603200 4.766529 -0.043649   | 86    | 1 | 0 | -1.840997  | 0.318827  | 2.420417  |  |  |
| 12                    | 1      | 0      | -2.562541 4.767765 0.115114   | 87    | 1 | 0 | -0.792871  | -1.106112 | 2.514781  |  |  |
| 13                    | 8      | 0      | 0.037461 4.418248 1.735128    | 88    | 7 | 0 | -3.715963  | -0.569170 | 4.070534  |  |  |
| 14                    | 8      | 0      | 0.050958 6.445826 2.814017    | 89    | 6 | 0 | 3.130245   | -3.956887 | 1.083889  |  |  |
| 15                    | 6      | 0      | 0.025330 6.290291 0.362450    | 90    | 1 | 0 | 2.127961   | -3.841078 | 1.481635  |  |  |
| 16                    | 6      | 0      | 0.019261 7.604594 -0.110822   | 91    | 7 | 0 | 4.679791   | -3.589304 | -0.724045 |  |  |
| 17                    | 6      | 0      | 0.004877 7.800187 -1.495415   | 92    | 1 | 0 | 3.899465   | -5.002270 | 2.811933  |  |  |
| 18                    | 6      | 0      | -0.002983 6.699928 -2.371868  | 93    | 1 | 0 | -3.779226  | -4.978253 | -2.707893 |  |  |
| 19                    | 6      | 0      | 0.003193 5.383135 -1.887532   | 94    | 6 | 0 | -5.526527  | 0.693078  | -1.270023 |  |  |
| 20                    | 6      | 0      | 0.017451 5.194593 -0.506884   | 95    | 1 | 0 | -5.758944  | 1.704659  | -1.604574 |  |  |
| 21                    | 6      | 0      | 0.025398 3.892062 0.281776    | 96    | 1 | 0 | -4.918095  | 0.213295  | -2.042488 |  |  |
| 22                    | 6      | 0      | 1.279868 3.067876 0.119967    | 97    | 6 | 0 | 5.669163   | 0.729023  | 1.162622  |  |  |
| 23                    | 6      | 0      | 2.533476 3.687960 0.008707    | 98    | 1 | 0 | 5.941120   | 1.749040  | 1.437425  |  |  |
| 24                    | 6      | 0      | 3.683309 2.921152 -0.040272   | 99    | 1 | 0 | 5.111946   | 0.292620  | 1.996960  |  |  |
| 25                    | 6      | 0      | 3.637730 1.518478 0.035772    | 100   | 6 | 0 | -6.780953  | -0.095920 | -0.976617 |  |  |
| 26                    | 6      | 0      | 2.395336 0.865748 0.107870    | 101   | 6 | 0 | -7.838407  | -0.264312 | -1.897159 |  |  |
| 27                    | 6      | 0      | 1.237481 1.668804 0.146084    | 102   | 6 | 0 | -6.922086  | -0.706354 | 0.275713  |  |  |
| 28                    | 6      | 0      | -1.186915 1.669031 0.134759   | 103   | 6 | 0 | -8.993579  | -1.002646 | -1.568521 |  |  |
| 29                    | 6      | 0      | -2.342789 0.865569 0.060581   | 104   | 6 | 0 | -8.051455  | -1.456040 | 0.610751  |  |  |
| 30                    | 6      | 0      | -3.586458 1.517305 0.001488   | 105   | 6 | 0 | -9.112281  | -1.600660 | -0.327302 |  |  |
| 31                    | 6      | 0      | -3.638047 2.921723 0.033831   | 106   | 1 | 0 | -9.768876  | -1.088115 | -2.314643 |  |  |
| 32                    | 6      | 0      | -2.488615 3.688353 0.090613   | 107   | 7 | 0 | -7.791533  | 0.303256  | -3.216038 |  |  |
| 33                    | 6      | 0      | -1.231037 3.067916 0.135645   | 108   | 8 | 0 | -8.805730  | 0.190908  | -3.979099 |  |  |
| 34                    | 6      | 0      | 2.304977 -0.644000 0.149521   | 109   | 8 | 0 | -6.730277  | 0.904310  | -3.598100 |  |  |
| 35                    | 6      | 0      | 1.734196 -0.769793 -2.285863  | 110   | 6 | 0 | 6.886454   | -0.093877 | 0.812962  |  |  |
| 36                    | 6      | 0      | 2.299795 -1.139699 -3.641145  | 111   | 6 | 0 | 7.995030   | -0.260335 | 1.671784  |  |  |
| 37                    | 6      | 0      | 1.603238 -1.979170 -4.522436  | 112   | 6 | 0 | 6.937333   | -0.740638 | -0.427989 |  |  |
| 38                    | 6      | 0      | 2.154300 -2.272127 -5.775906  | 113   | 6 | 0 | 9.111436   | -1.033897 | 1.294803  |  |  |
| 39                    | 6      | 0      | 3.390012 -1.714862 -6.117395  | 114   | 6 | 0 | 8.028654   | -1.524129 | -0.809877 |  |  |
| 40                    | 6      | 0      | 4.024392 -0.883825 -5.187106  | 115   | 6 | 0 | 9.141632   | -1.667200 | 0.066074  |  |  |
| 41                    | 6      | 0      | 2.389104 -2.783287 -1.049396  | 116   | 1 | 0 | 9.928915   | -1.117256 | 1.994451  |  |  |
| 42                    | 6      | 0      | 3.437430 -3.455160 -0.189697  | 117   | 7 | 0 | 8.042960   | 0.345276  | 2.973552  |  |  |
| 43                    | 1      | 0      | 6.607159 -4.306181 -0.468723  | 118   | 8 | 0 | 9.095990   | 0.220787  | 3.680183  |  |  |
| 44                    | 1      | 0      | 6.194300 -5.249336 1.811768   | 119   | 8 | 0 | 7.025882   | 0.992565  | 3.397557  |  |  |
| 45                    | 1      | 0      | -0.912438 -2.410537 4.516255  | 120   | 1 | 0 | 6.089467   | -0.631160 | -1.085376 |  |  |
| 46                    | 1      | 0      | -2.055159 -2.923376 6.682662  | 121   | 1 | 0 | -6.114469  | -0.595336 | 0.981572  |  |  |
| 47                    | 1      | 0      | -4.297537 -1.880018 7.141339  | 122   | 8 | 0 | -8.215819  | -2.092587 | 1.809619  |  |  |
| 48                    | 1      | 0      | -5.286927 -0.372647 5.409898  | 123   | 8 | 0 | -10.194135 | -2.349396 | 0.086285  |  |  |
| 49                    | 7      | 0      | 2.539894 -1.310614 -1.164269  | 124   | 8 | 0 | 10.181212  | -2.450351 | -0.390056 |  |  |
| 50                    | 7      | 0      | -2.582850 -1.303908 1.332138  | 125   | 8 | 0 | 8.106566   | -2.196161 | -1.998205 |  |  |
| 51                    | 7      | 0      | 3.500895 -0.597086 -3.974149  | 126   | 6 | 0 | 11.349697  | -2.626869 | 0.472173  |  |  |
| 52                    | 7      | 0      | -4.723494 -3.562189 0.786548  | 127   | 1 | 0 | 11.070786  | -3.116262 | 1.410548  |  |  |
| 53                    | 6      | 0      | 5.632021 -4.221720 -0.001068  | 128   | 1 | 0 | 12.023400  | -3.265927 | -0.095299 |  |  |
| 54                    | 6      | 0      | 5.398977 -4.746801 1.273795   | 129   | 1 | 0 | 11.830005  | -1.665226 | 0.678022  |  |  |
| 55                    | 6      | 0      | 4.121646 -4.608880 1.826012   | 130   | 6 | 0 | 6.989533   | -2.099190 | -2.953728 |  |  |
| 56                    | 6      | 0      | -2.248470 -0.644384 0.037120  | 131   | 1 | 0 | 6.855554   | -1.062529 | -3.274868 |  |  |
| 57                    | 6      | 0      | -2.445101 -2.778990 1.229724  | 132   | 1 | 0 | 7.299153   | -2.714726 | -3.796042 |  |  |
| 58                    | 6      | 0      | -3.454329 -3.439319 0.316097  | 133   | 1 | 0 | 6.072106   | -2.489653 | -2.503824 |  |  |
| 59                    | 6      | 0      | -3.087731 -3.942025 -0.941288 | 134   | 6 | 0 | -7.159259  | -1.987474 | 2.830769  |  |  |
| 60                    | 6      | 0      | -4.046128 -4.584176 -1.733763 | 135   | 1 | 0 | -7.026102  | -0.944397 | 3.130918  |  |  |
| 61                    | 6      | 0      | -5.350825 -4.711474 -1.246850 | 136   | 1 | 0 | -7.532660  | -2.573114 | 3.668511  |  |  |
| 62                    | 6      | 0      | -5.643305 -4.185558 0.015389  | 137   | 1 | 0 | -6.222436  | -2.406085 | 2.451739  |  |  |
| 63                    | 6      | 0      | -1.845445 -0.770472 2.503905  | 138   | 6 | 0 | -11.312279 | -2.527316 | -0.839902 |  |  |
| 64                    | 6      | 0      | -2.504227 -1.131170 3.818753  | 139   | 1 | 0 | -10.987994 | -3.048549 | -1.745984 |  |  |
| 65                    | 6      | 0      | -1.882254 -1.981724 4.744166  | 140   | 1 | 0 | -12.032354 | -3.136570 | -0.297136 |  |  |
| 66                    | 6      | 0      | -2.521833 -2.266166 5.957014  | 141   | 1 | 0 | -11.758608 | -1.562630 | -1.100633 |  |  |
| 67                    | 6      | 0      | -3.768761 -1.689192 6.214701  | ----- |   |   |            |           |           |  |  |
| 68                    | 6      | 0      | -4.325012 -0.847536 5.244857  |       |   |   |            |           |           |  |  |
| 69                    | 1      | 0      | 3.069255 -1.023359 0.832658   |       |   |   |            |           |           |  |  |

# Optimized Coordinates of 2-b at the CPCM(H<sub>2</sub>O)-B3LYP/6-31G level.

| Standard orientation: |  |  |  |  | 70  | 1 | 0 | 1.377599   | -0.682944 | 0.511889  |
|-----------------------|--|--|--|--|-----|---|---|------------|-----------|-----------|
|                       |  |  |  |  | 71  | 1 | 0 | 1.385136   | 0.631960  | -2.299546 |
|                       |  |  |  |  | 72  | 1 | 0 | 0.269353   | -0.740639 | -2.196201 |
|                       |  |  |  |  | 73  | 1 | 0 | -0.059926  | -2.044570 | -4.182683 |
|                       |  |  |  |  | 74  | 1 | 0 | 0.598488   | -2.565595 | -6.540359 |
|                       |  |  |  |  | 75  | 1 | 0 | 2.725793   | -1.575538 | -7.446567 |
|                       |  |  |  |  | 76  | 1 | 0 | 4.088409   | -0.106554 | -5.950777 |
|                       |  |  |  |  | 77  | 1 | 0 | 1.947804   | -2.903598 | -2.320338 |
|                       |  |  |  |  | 78  | 1 | 0 | 1.114349   | -2.745126 | -0.763623 |
|                       |  |  |  |  | 79  | 1 | 0 | -3.046514  | -0.841811 | -0.265903 |
|                       |  |  |  |  | 80  | 1 | 0 | -1.283297  | -0.711556 | -0.140934 |
|                       |  |  |  |  | 81  | 1 | 0 | -2.126881  | -2.764654 | 2.734564  |
|                       |  |  |  |  | 82  | 1 | 0 | -1.191678  | -2.704549 | 1.230084  |
|                       |  |  |  |  | 83  | 1 | 0 | -2.055398  | -3.888194 | -0.649047 |
|                       |  |  |  |  | 84  | 1 | 0 | -6.138863  | -5.278619 | -0.509323 |
|                       |  |  |  |  | 85  | 1 | 0 | -6.416982  | -3.965339 | 1.599878  |
|                       |  |  |  |  | 86  | 1 | 0 | -1.555819  | 0.758429  | 2.570909  |
|                       |  |  |  |  | 87  | 1 | 0 | -0.434346  | -0.612150 | 2.612524  |
|                       |  |  |  |  | 88  | 7 | 0 | -3.120473  | -0.033796 | 4.529949  |
|                       |  |  |  |  | 89  | 6 | 0 | 3.044775   | -3.869876 | 0.609134  |
|                       |  |  |  |  | 90  | 1 | 0 | 2.102635   | -3.786532 | 1.139968  |
|                       |  |  |  |  | 91  | 7 | 0 | 4.357571   | -3.344560 | -1.344097 |
|                       |  |  |  |  | 92  | 1 | 0 | 4.012907   | -5.069747 | 2.124702  |
|                       |  |  |  |  | 93  | 1 | 0 | -3.902016  | -5.244879 | -1.656872 |
|                       |  |  |  |  | 94  | 6 | 0 | -5.682997  | 1.083944  | -0.911662 |
|                       |  |  |  |  | 95  | 1 | 0 | -6.349710  | 1.916627  | -0.715125 |
|                       |  |  |  |  | 96  | 1 | 0 | -5.085695  | 1.284093  | -1.804167 |
|                       |  |  |  |  | 97  | 6 | 0 | 5.870905   | 1.181620  | 0.551260  |
|                       |  |  |  |  | 98  | 1 | 0 | 6.512997   | 1.960736  | 0.154740  |
|                       |  |  |  |  | 99  | 1 | 0 | 5.431386   | 1.505508  | 1.497568  |
|                       |  |  |  |  | 100 | 6 | 0 | -6.433797  | -0.208748 | -1.085672 |
|                       |  |  |  |  | 101 | 6 | 0 | -7.593212  | -0.594115 | -0.379624 |
|                       |  |  |  |  | 102 | 6 | 0 | -5.971309  | -1.091359 | -2.075249 |
|                       |  |  |  |  | 103 | 6 | 0 | -8.260794  | -1.799608 | -0.665369 |
|                       |  |  |  |  | 104 | 6 | 0 | -6.616024  | -2.295252 | -2.369017 |
|                       |  |  |  |  | 105 | 6 | 0 | -7.786912  | -2.653338 | -1.647564 |
|                       |  |  |  |  | 106 | 1 | 0 | -9.147385  | -2.035703 | -0.097316 |
|                       |  |  |  |  | 107 | 7 | 0 | -8.191945  | 0.224517  | 0.655813  |
|                       |  |  |  |  | 108 | 8 | 0 | -9.323870  | -0.122946 | 1.126371  |
|                       |  |  |  |  | 109 | 8 | 0 | -7.585755  | 1.258860  | 1.075676  |
|                       |  |  |  |  | 110 | 6 | 0 | 6.615785   | -0.110489 | 0.754969  |
|                       |  |  |  |  | 111 | 6 | 0 | 7.657742   | -0.599381 | -0.061143 |
|                       |  |  |  |  | 112 | 6 | 0 | 6.288785   | -0.871062 | 1.889346  |
|                       |  |  |  |  | 113 | 6 | 0 | 8.348726   | -1.783015 | 0.257941  |
|                       |  |  |  |  | 114 | 6 | 0 | 6.952994   | -2.055894 | 2.215505  |
|                       |  |  |  |  | 115 | 6 | 0 | 8.008414   | -2.516647 | 1.382476  |
|                       |  |  |  |  | 116 | 1 | 0 | 9.143725   | -2.099836 | -0.399630 |
|                       |  |  |  |  | 117 | 7 | 0 | 8.106302   | 0.087022  | -1.255947 |
|                       |  |  |  |  | 118 | 8 | 0 | 9.181659   | -0.305992 | -1.814668 |
|                       |  |  |  |  | 119 | 8 | 0 | 7.425247   | 1.051446  | -1.724850 |
|                       |  |  |  |  | 120 | 1 | 0 | 5.500622   | -0.506701 | 2.534871  |
|                       |  |  |  |  | 121 | 1 | 0 | -5.086292  | -0.811382 | -2.631079 |
|                       |  |  |  |  | 122 | 8 | 0 | -6.200881  | -3.182690 | -3.323623 |
|                       |  |  |  |  | 123 | 8 | 0 | -8.366760  | -3.855307 | -1.985701 |
|                       |  |  |  |  | 124 | 8 | 0 | 8.616022   | -3.691593 | 1.763996  |
|                       |  |  |  |  | 125 | 8 | 0 | 6.664785   | -2.830001 | 3.305839  |
|                       |  |  |  |  | 126 | 6 | 0 | 9.739896   | -4.190464 | 0.968138  |
|                       |  |  |  |  | 127 | 1 | 0 | 10.556149  | -3.462080 | 0.953005  |
|                       |  |  |  |  | 128 | 1 | 0 | 10.058796  | -5.099301 | 1.474265  |
|                       |  |  |  |  | 129 | 1 | 0 | 9.420860   | -4.421955 | -0.052390 |
|                       |  |  |  |  | 130 | 6 | 0 | 5.574509   | -2.433563 | 4.203961  |
|                       |  |  |  |  | 131 | 1 | 0 | 4.624253   | -2.405910 | 3.663892  |
|                       |  |  |  |  | 132 | 1 | 0 | 5.549830   | -3.208223 | 4.967247  |
|                       |  |  |  |  | 133 | 1 | 0 | 5.784370   | -1.462476 | 4.660373  |
|                       |  |  |  |  | 134 | 6 | 0 | -5.004447  | -2.879752 | -4.117105 |
|                       |  |  |  |  | 135 | 1 | 0 | -4.125383  | -2.802752 | -3.471696 |
|                       |  |  |  |  | 136 | 1 | 0 | -4.900151  | -3.725036 | -4.793779 |
|                       |  |  |  |  | 137 | 1 | 0 | -5.143636  | -1.956511 | -4.686112 |
|                       |  |  |  |  | 138 | 6 | 0 | -9.591158  | -4.262672 | -1.292898 |
|                       |  |  |  |  | 139 | 1 | 0 | -10.390168 | -3.533633 | -1.457819 |
|                       |  |  |  |  | 140 | 1 | 0 | -9.859389  | -5.218344 | -1.738572 |
|                       |  |  |  |  | 141 | 1 | 0 | -9.407528  | -4.386728 | -0.225127 |

**Optimized Coordinates of 3-a at the CPCM(H<sub>2</sub>O)-B3LYP/6-31G level.**

Standard orientation:

| Center<br>Number | Atomic<br>Number | Atomic<br>Type | Coordinates (Angstroms) |   |   |   |   |           |           |           |  |
|------------------|------------------|----------------|-------------------------|---|---|---|---|-----------|-----------|-----------|--|
|                  |                  |                | X                       | Y | Z |   |   |           |           |           |  |
| 65               |                  |                |                         |   |   | 6 | 0 | -1.532654 | -0.935857 | 5.470162  |  |
| 66               |                  |                |                         |   |   | 6 | 0 | -2.054371 | -0.777794 | 6.759940  |  |
| 67               |                  |                |                         |   |   | 6 | 0 | -3.132636 | 0.091395  | 6.950577  |  |
| 68               |                  |                |                         |   |   | 6 | 0 | -3.642920 | 0.771400  | 5.838973  |  |
| 69               |                  |                |                         |   |   | 1 | 0 | 3.134584  | -1.231027 | 0.725410  |  |
| 70               |                  |                |                         |   |   | 1 | 0 | 1.377454  | -1.052963 | 0.790527  |  |
| 71               |                  |                |                         |   |   | 1 | 0 | 1.382590  | 0.077770  | -2.116878 |  |
| 72               |                  |                |                         |   |   | 1 | 0 | 0.207800  | -1.210817 | -1.820201 |  |
| 73               |                  |                |                         |   |   | 1 | 0 | -0.515403 | -2.272578 | -3.776811 |  |
| 74               |                  |                |                         |   |   | 1 | 0 | -0.085024 | -3.043579 | -6.120480 |  |
| 75               |                  |                |                         |   |   | 1 | 0 | 2.194101  | -2.668659 | -7.116699 |  |
| 76               |                  |                |                         |   |   | 1 | 0 | 3.930922  | -1.532225 | -5.722481 |  |
| 77               |                  |                |                         |   |   | 1 | 0 | 1.853617  | -3.451614 | -1.902337 |  |
| 78               |                  |                |                         |   |   | 1 | 0 | 1.149563  | -3.218199 | -0.292574 |  |
| 79               |                  |                |                         |   |   | 1 | 0 | -2.951258 | -1.334761 | 0.058398  |  |
| 80               |                  |                |                         |   |   | 1 | 0 | -1.215976 | -1.168795 | 0.363137  |  |
| 81               |                  |                |                         |   |   | 1 | 0 | -2.725351 | -2.514028 | 3.461564  |  |
| 82               |                  |                |                         |   |   | 1 | 0 | -1.884570 | -3.033233 | 1.994797  |  |
| 83               |                  |                |                         |   |   | 1 | 0 | -3.130303 | -4.451628 | 0.557128  |  |
| 84               |                  |                |                         |   |   | 1 | 0 | -7.439296 | -4.426817 | 0.805498  |  |
| 85               |                  |                |                         |   |   | 1 | 0 | -7.244849 | -2.510634 | 2.399811  |  |
| 86               |                  |                |                         |   |   | 1 | 0 | -1.371444 | 0.668580  | 2.625159  |  |
| 87               |                  |                |                         |   |   | 1 | 0 | -0.591333 | -0.871466 | 3.012769  |  |
| 88               |                  |                |                         |   |   | 7 | 0 | -3.144578 | 0.626411  | 4.591219  |  |
| 89               |                  |                |                         |   |   | 6 | 0 | 3.195583  | -4.281759 | 0.959267  |  |
| 90               |                  |                |                         |   |   | 1 | 0 | 2.294467  | -4.196668 | 1.556676  |  |
| 91               |                  |                |                         |   |   | 7 | 0 | 4.351728  | -3.791963 | -1.099051 |  |
| 92               |                  |                |                         |   |   | 1 | 0 | 4.293264  | -5.423188 | 2.430874  |  |
| 93               |                  |                |                         |   |   | 1 | 0 | -5.330623 | -5.415290 | -0.143914 |  |
| 94               |                  |                |                         |   |   | 6 | 0 | -5.598282 | 0.586092  | -1.267725 |  |
| 95               |                  |                |                         |   |   | 1 | 0 | -6.458938 | 1.129604  | -0.899808 |  |
| 96               |                  |                |                         |   |   | 1 | 0 | -5.139484 | 1.153704  | -2.074141 |  |
| 97               |                  |                |                         |   |   | 6 | 0 | 6.059678  | 0.840282  | 0.341422  |  |
| 98               |                  |                |                         |   |   | 1 | 0 | 6.681323  | 1.216027  | -0.460759 |  |
| 99               |                  |                |                         |   |   | 1 | 0 | 5.897814  | 1.631986  | 1.068459  |  |
| 100              |                  |                |                         |   |   | 6 | 0 | -5.980450 | -0.794365 | -1.765080 |  |
| 101              |                  |                |                         |   |   | 6 | 0 | -5.079664 | -1.638823 | -2.446127 |  |
| 102              |                  |                |                         |   |   | 6 | 0 | -7.283822 | -1.308154 | -1.579066 |  |
| 103              |                  |                |                         |   |   | 6 | 0 | -5.438144 | -2.896212 | -2.941653 |  |
| 104              |                  |                |                         |   |   | 6 | 0 | -7.664318 | -2.555140 | -2.096180 |  |
| 105              |                  |                |                         |   |   | 6 | 0 | -6.745647 | -3.345725 | -2.784986 |  |
| 106              |                  |                |                         |   |   | 1 | 0 | -4.696932 | -3.496173 | -3.451932 |  |
| 107              |                  |                |                         |   |   | 1 | 0 | -8.675869 | -2.907356 | -1.948105 |  |
| 108              |                  |                |                         |   |   | 1 | 0 | -7.042451 | -4.306525 | -3.185173 |  |
| 109              |                  |                |                         |   |   | 7 | 0 | -3.683833 | -1.252850 | -2.684193 |  |
| 110              |                  |                |                         |   |   | 8 | 0 | -2.818085 | -2.177973 | -2.669977 |  |
| 111              |                  |                |                         |   |   | 8 | 0 | -3.395724 | -0.044730 | -2.912584 |  |
| 112              |                  |                |                         |   |   | 6 | 0 | 6.675162  | -0.370474 | 1.012353  |  |
| 113              |                  |                |                         |   |   | 6 | 0 | 6.118940  | -0.965315 | 2.163352  |  |
| 114              |                  |                |                         |   |   | 6 | 0 | 7.840188  | -0.983907 | 0.500603  |  |
| 115              |                  |                |                         |   |   | 6 | 0 | 6.674063  | -2.088824 | 2.782918  |  |
| 116              |                  |                |                         |   |   | 6 | 0 | 8.420609  | -2.096496 | 1.127369  |  |
| 117              |                  |                |                         |   |   | 6 | 0 | 7.840399  | -2.647594 | 2.268626  |  |
| 118              |                  |                |                         |   |   | 1 | 0 | 6.194264  | -2.501724 | 3.659701  |  |
| 119              |                  |                |                         |   |   | 1 | 0 | 9.320282  | -2.532070 | 0.715030  |  |
| 120              |                  |                |                         |   |   | 1 | 0 | 8.290190  | -3.506418 | 2.749773  |  |
| 121              |                  |                |                         |   |   | 7 | 0 | 4.906294  | -0.436213 | 2.799865  |  |
| 122              |                  |                |                         |   |   | 8 | 0 | 4.144185  | -1.262474 | 3.380816  |  |
| 123              |                  |                |                         |   |   | 8 | 0 | 4.675016  | 0.806531  | 2.772569  |  |
| 124              |                  |                |                         |   |   | 6 | 0 | -8.306584 | -0.538540 | -0.797453 |  |
| 125              |                  |                |                         |   |   | 6 | 0 | 8.502520  | -0.459777 | -0.738652 |  |
| 126              |                  |                |                         |   |   | 9 | 0 | 9.619263  | -1.199171 | -1.101265 |  |
| 127              |                  |                |                         |   |   | 9 | 0 | 8.940592  | 0.863884  | -0.599866 |  |
| 128              |                  |                |                         |   |   | 9 | 0 | 7.651522  | -0.462892 | -1.847678 |  |
| 129              |                  |                |                         |   |   | 9 | 0 | -7.875940 | -0.250383 | 0.501765  |  |
| 130              |                  |                |                         |   |   | 9 | 0 | -9.507246 | -1.221281 | -0.668892 |  |
| 131              |                  |                |                         |   |   | 9 | 0 | -8.623767 | 0.697150  | -1.376506 |  |



# Optimized Coordinates of 3-b at the CPCM(H<sub>2</sub>O)-B3LYP/6-31G level.

| Standard orientation: |               |             |                         | 65        | 6         | 0   | -1.308950 | -0.174502 | 5.549588  |           |           |
|-----------------------|---------------|-------------|-------------------------|-----------|-----------|-----|-----------|-----------|-----------|-----------|-----------|
| Center Number         | Atomic Number | Atomic Type | Coordinates (Angstroms) |           |           |     |           |           |           |           |           |
|                       |               |             | X                       | Y         | Z         |     |           |           |           |           |           |
| 1                     | 17            | 0           | 5.210773                | 3.320454  | -1.562511 | 66  | 6         | 0         | -1.780663 | 0.098528  | 6.839420  |
| 2                     | 17            | 0           | -5.188490               | 3.534493  | -0.839681 | 67  | 6         | 0         | -2.907474 | 0.912388  | 6.988366  |
| 3                     | 8             | 0           | 4.718350                | 0.382917  | -0.552153 | 68  | 6         | 0         | -3.514795 | 1.423863  | 5.835914  |
| 4                     | 8             | 0           | 0.062658                | 0.926353  | 0.273557  | 69  | 1         | 0         | 3.132924  | -1.148031 | 0.652283  |
| 5                     | 8             | 0           | -4.670254               | 0.543451  | -0.086979 | 70  | 1         | 0         | 1.383524  | -0.942184 | 0.820137  |
| 6                     | 6             | 0           | 0.148736                | 5.821412  | 0.858165  | 71  | 1         | 0         | 1.269611  | -0.090921 | -2.214896 |
| 7                     | 1             | 0           | 0.110262                | 8.287522  | -0.618788 | 72  | 1         | 0         | 0.057149  | -1.292990 | -1.754925 |
| 8                     | 1             | 0           | 0.009980                | 8.358118  | -3.120120 | 73  | 1         | 0         | -0.749269 | -2.577632 | -3.550000 |
| 9                     | 1             | 0           | -0.059957               | 6.255400  | -4.423142 | 74  | 1         | 0         | -0.422607 | -3.594886 | -5.809033 |
| 10                    | 1             | 0           | -0.034147               | 4.045724  | -3.284225 | 75  | 1         | 0         | 1.817334  | -3.357740 | -6.929984 |
| 11                    | 1             | 0           | 2.624969                | 4.428324  | -1.195926 | 76  | 1         | 0         | 3.619655  | -2.103266 | -5.734211 |
| 12                    | 1             | 0           | -2.518390               | 4.518130  | -0.925664 | 77  | 1         | 0         | 1.558808  | -3.588327 | -1.638296 |
| 13                    | 8             | 0           | 0.141200                | 4.433448  | 1.008147  | 78  | 1         | 0         | 1.021930  | -3.166688 | -0.003155 |
| 14                    | 8             | 0           | 0.196484                | 6.575662  | 1.833917  | 79  | 1         | 0         | -3.005041 | -1.227159 | 0.291005  |
| 15                    | 6             | 0           | 0.092720                | 6.126495  | -0.578624 | 80  | 1         | 0         | -1.252112 | -1.066484 | 0.488547  |
| 16                    | 6             | 0           | 0.078600                | 7.375353  | -1.203838 | 81  | 1         | 0         | -2.446252 | -2.045534 | 3.792498  |
| 17                    | 6             | 0           | 0.022534                | 7.406594  | -2.600892 | 82  | 1         | 0         | -1.742684 | -2.693517 | 2.305069  |
| 18                    | 6             | 0           | -0.017371               | 6.211006  | -3.340458 | 83  | 1         | 0         | -3.090667 | -4.259308 | 1.114209  |
| 19                    | 6             | 0           | -0.003276               | 4.960740  | -2.703710 | 84  | 1         | 0         | -7.325879 | -4.399691 | 1.935903  |
| 20                    | 6             | 0           | 0.052361                | 4.935635  | -1.311149 | 85  | 1         | 0         | -7.027384 | -2.355077 | 3.343965  |
| 21                    | 6             | 0           | 0.076058                | 3.737551  | -0.375615 | 86  | 1         | 0         | -1.380679 | 1.094826  | 2.541332  |
| 22                    | 6             | 0           | 1.310490                | 2.875470  | -0.477228 | 87  | 1         | 0         | -0.492650 | -0.346416 | 3.055418  |
| 23                    | 6             | 0           | 2.545909                | 3.395210  | -0.884681 | 88  | 7         | 0         | -3.066049 | 1.166358  | 4.587510  |
| 24                    | 6             | 0           | 3.670145                | 2.585737  | -0.910436 | 89  | 6         | 0         | 3.144975  | -4.196559 | 1.159005  |
| 25                    | 6             | 0           | 3.620904                | 1.232605  | -0.526171 | 90  | 1         | 0         | 2.320204  | -3.992645 | 1.833246  |
| 26                    | 6             | 0           | 2.380254                | 0.672009  | -0.160957 | 91  | 7         | 0         | 4.090587  | -4.005753 | -1.050507 |
| 27                    | 6             | 0           | 1.260629                | 1.521474  | -0.124533 | 92  | 1         | 0         | 4.339026  | -5.238904 | 2.629074  |
| 28                    | 6             | 0           | -1.152999               | 1.570569  | 0.033422  | 93  | 1         | 0         | -5.309581 | -5.368561 | 0.785902  |
| 29                    | 6             | 0           | -2.304455               | 0.781196  | 0.194268  | 94  | 6         | 0         | -5.531969 | 0.431241  | -1.299589 |
| 30                    | 6             | 0           | -3.542001               | 1.353750  | -0.158777 | 95  | 1         | 0         | -6.405542 | 1.056660  | -1.146231 |
| 31                    | 6             | 0           | -3.587732               | 2.705662  | -0.543722 | 96  | 1         | 0         | -4.981112 | 0.805822  | -2.160142 |
| 32                    | 6             | 0           | -2.440567               | 3.476664  | -0.643177 | 97  | 6         | 0         | 5.978641  | 0.791064  | 0.129164  |
| 33                    | 6             | 0           | -1.188319               | 2.911618  | -0.370270 | 98  | 1         | 0         | 6.660869  | 1.177192  | -0.620774 |
| 34                    | 6             | 0           | 2.235574                | -0.802007 | 0.136947  | 99  | 1         | 0         | 5.759187  | 1.581152  | 0.843733  |
| 35                    | 6             | 0           | 1.102801                | -1.163526 | -2.086452 | 100 | 6         | 0         | -5.938572 | -1.013242 | -1.513255 |
| 36                    | 6             | 0           | 1.270640                | -1.820170 | -3.443160 | 101 | 6         | 0         | -7.105392 | -1.564461 | -0.943217 |
| 37                    | 6             | 0           | 0.207282                | -2.501437 | -4.054426 | 102 | 6         | 0         | -5.213071 | -1.868503 | -2.377917 |
| 38                    | 6             | 0           | 0.389575                | -3.065155 | -5.322932 | 103 | 6         | 0         | -7.547623 | -2.863333 | -1.217520 |
| 39                    | 6             | 0           | 1.632810                | -2.935103 | -5.949092 | 104 | 6         | 0         | -5.635203 | -3.178790 | -2.641636 |
| 40                    | 6             | 0           | 2.642810                | -2.235598 | -5.279473 | 105 | 6         | 0         | -6.801695 | -3.677608 | -2.061514 |
| 41                    | 6             | 0           | 1.855397                | -3.066424 | -0.723821 | 106 | 1         | 0         | -8.462058 | -3.215925 | -0.761098 |
| 42                    | 6             | 0           | 3.079288                | -3.766725 | -0.174164 | 107 | 1         | 0         | -5.055694 | -3.802785 | -3.308021 |
| 43                    | 1             | 0           | 5.960241                | -4.852106 | -1.345455 | 108 | 1         | 0         | -7.125917 | -4.688902 | -2.270428 |
| 44                    | 1             | 0           | 6.200457                | -5.688514 | 0.998588  | 109 | 7         | 0         | -7.961189 | -0.792084 | -0.035501 |
| 45                    | 1             | 0           | -0.435770               | -0.800681 | 5.401067  | 110 | 8         | 0         | -9.191557 | -1.087222 | 0.004743  |
| 46                    | 1             | 0           | -1.278523               | -0.316403 | 7.706646  | 111 | 8         | 0         | -7.446161 | 0.111124  | 0.683547  |
| 47                    | 1             | 0           | -3.305825               | 1.149801  | 7.968004  | 112 | 6         | 0         | 6.567276  | -0.419472 | 0.823313  |
| 48                    | 1             | 0           | -4.387168               | 2.065809  | 5.908195  | 113 | 6         | 0         | 7.443524  | -1.319506 | 0.180443  |
| 49                    | 7             | 0           | 2.080129                | -1.647746 | -1.084391 | 114 | 6         | 0         | 6.309251  | -0.679143 | 2.190318  |
| 50                    | 7             | 0           | -2.455389               | -0.670464 | 2.224821  | 115 | 6         | 0         | 8.040221  | -2.399956 | 0.840250  |
| 51                    | 7             | 0           | 2.475333                | -1.684601 | -4.056784 | 116 | 6         | 0         | 6.888869  | -1.767536 | 2.855564  |
| 52                    | 7             | 0           | -4.984870               | -2.204048 | 3.021614  | 117 | 6         | 0         | 7.752891  | -2.630099 | 2.180558  |
| 53                    | 6             | 0           | 5.178008                | -4.678501 | -0.613181 | 118 | 1         | 0         | 8.714035  | -3.044089 | 0.292779  |
| 54                    | 6             | 0           | 5.311593                | -5.145612 | 0.699149  | 119 | 1         | 0         | 6.666610  | -1.934467 | 3.900596  |
| 55                    | 6             | 0           | 4.273970                | -4.895718 | 1.602233  | 120 | 1         | 0         | 8.198986  | -3.470323 | 2.696669  |
| 56                    | 6             | 0           | -2.224385               | -0.621790 | 0.751906  | 121 | 7         | 0         | 7.820206  | -1.163710 | -1.230125 |
| 57                    | 6             | 0           | -2.562476               | -2.068836 | 2.704789  | 122 | 8         | 0         | 8.930978  | -1.648137 | -1.597466 |
| 58                    | 6             | 0           | -3.891807               | -2.727773 | 2.406593  | 123 | 8         | 0         | 7.031430  | -0.577883 | -2.025236 |
| 59                    | 6             | 0           | -3.981675               | -3.864325 | 1.590087  | 124 | 6         | 0         | -3.993395 | -1.381695 | -3.100852 |
| 60                    | 6             | 0           | -5.223316               | -4.485086 | 1.408940  | 125 | 6         | 0         | 5.442170  | 0.240042  | 2.996889  |
| 61                    | 6             | 0           | -6.346895               | -3.947431 | 2.044329  | 126 | 9         | 0         | -3.023306 | -0.843359 | -2.248421 |
| 62                    | 6             | 0           | -6.180794               | -2.804216 | 2.834209  | 127 | 9         | 0         | -4.281040 | -0.372746 | -4.028272 |
| 63                    | 6             | 0           | -1.492046               | 0.123512  | 3.027326  | 128 | 9         | 0         | -3.355683 | -2.391138 | -3.813166 |
| 64                    | 6             | 0           | -1.973886               | 0.370598  | 4.441477  | 129 | 9         | 0         | 4.183329  | 0.451076  | 2.424558  |
|                       |               |             |                         |           |           | 130 | 9         | 0         | 5.209279  | -0.232534 | 4.279877  |
|                       |               |             |                         |           |           | 131 | 9         | 0         | 6.004108  | 1.515293  | 3.147277  |

**Optimized Coordinates of 1-a at the CPCM(H<sub>2</sub>O)-B3LYP/6-31G(d) level.**

$E = -4349.306463$

Sum of electronic and thermal free energies =  $-4348.465679$

| Standard orientation: |        |        |                               | 63  | 6 | 0 | 1.555464   | -1.361721 | -2.529035 |
|-----------------------|--------|--------|-------------------------------|-----|---|---|------------|-----------|-----------|
| -----                 |        |        |                               | 64  | 6 | 0 | 2.024793   | -1.727862 | -3.925091 |
| Center                | Atomic | Atomic | Coordinates (Angstroms)       | 65  | 6 | 0 | 1.345004   | -2.678648 | -4.694261 |
| Number                | Number | Type   | X Y Z                         | 66  | 6 | 0 | 1.797582   | -2.962706 | -5.983649 |
| -----                 |        |        |                               | 67  | 6 | 0 | 2.917468   | -2.286840 | -6.462442 |
| 1                     | 17     | 0      | -5.215230 3.324357 0.233376   | 68  | 6 | 0 | 3.530361   | -1.353299 | -5.623126 |
| 2                     | 17     | 0      | 5.198892 3.344395 -0.531161   | 69  | 1 | 0 | -3.036468  | -1.461091 | -0.557875 |
| 3                     | 8      | 0      | -4.716664 0.362821 0.284066   | 70  | 1 | 0 | -1.291219  | -1.361675 | -0.343725 |
| 4                     | 8      | 0      | -0.010509 0.607107 -0.249687  | 71  | 1 | 0 | -1.328674  | -0.028211 | 2.246370  |
| 5                     | 8      | 0      | 4.729379 0.389708 -0.314680   | 72  | 1 | 0 | -0.468359  | -1.574730 | 2.217386  |
| 6                     | 6      | 0      | -0.121268 5.413647 -1.884558  | 73  | 1 | 0 | -0.278852  | -2.705974 | 4.300764  |
| 7                     | 1      | 0      | -0.051473 8.043536 -0.679991  | 74  | 1 | 0 | -1.006937  | -2.981203 | 6.678840  |
| 8                     | 1      | 0      | 0.100830 8.367571 1.800216    | 75  | 1 | 0 | -3.032267  | -1.709642 | 7.466829  |
| 9                     | 1      | 0      | 0.194225 6.411168 3.306651    | 76  | 1 | 0 | -4.211736  | -0.235134 | 5.840649  |
| 10                    | 1      | 0      | 0.140039 4.095919 2.403789    | 77  | 1 | 0 | -2.528358  | -3.388204 | 2.438393  |
| 11                    | 1      | 0      | -2.606385 4.364994 -0.151839  | 78  | 1 | 0 | -1.605441  | -3.461831 | 0.929258  |
| 12                    | 1      | 0      | 2.556763 4.376737 -0.515241   | 79  | 1 | 0 | 3.021687   | -1.371939 | 0.499956  |
| 13                    | 8      | 0      | -0.115086 4.044457 -1.866468  | 80  | 1 | 0 | 1.286983   | -1.321281 | 0.195952  |
| 14                    | 8      | 0      | -0.186089 6.039945 -2.919527  | 81  | 1 | 0 | 2.677762   | -3.603147 | -2.295214 |
| 15                    | 6      | 0      | -0.038072 5.890010 -0.490425  | 82  | 1 | 0 | 1.739860   | -3.541591 | -0.795151 |
| 16                    | 6      | 0      | -0.009251 7.196688 -0.002172  | 83  | 1 | 0 | 2.821971   | -4.250064 | 1.213383  |
| 17                    | 6      | 0      | 0.075517 7.367457 1.378763    | 84  | 1 | 0 | 7.108874   | -4.717426 | 1.176771  |
| 18                    | 6      | 0      | 0.128582 6.254547 2.234046    | 85  | 1 | 0 | 7.099429   | -3.702129 | -1.098375 |
| 19                    | 6      | 0      | 0.098586 4.949190 1.733743    | 86  | 1 | 0 | 1.397853   | -0.279642 | -2.507262 |
| 20                    | 6      | 0      | 0.014484 4.786608 0.354139    | 87  | 1 | 0 | 0.577820   | -1.837491 | -2.330011 |
| 21                    | 6      | 0      | -0.032046 3.513682 -0.477370  | 88  | 7 | 0 | 3.105234   | -1.069581 | -4.386226 |
| 22                    | 6      | 0      | -1.268956 2.675046 -0.236537  | 89  | 6 | 0 | -3.639462  | -4.303000 | -0.495794 |
| 23                    | 6      | 0      | -2.523417 3.284547 -0.121848  | 90  | 1 | 0 | -2.668922  | -4.436678 | -0.964400 |
| 24                    | 6      | 0      | -3.665980 2.519927 0.038581   | 91  | 7 | 0 | -4.921971  | -3.407430 | 1.330318  |
| 25                    | 6      | 0      | -3.592147 1.114658 0.083603   | 92  | 1 | 0 | -4.734989  | -5.382054 | -2.012893 |
| 26                    | 6      | 0      | -2.347406 0.476914 -0.002940  | 93  | 1 | 0 | 4.910111   | -4.999107 | 2.371098  |
| 27                    | 6      | 0      | -1.201498 1.281153 -0.168144  | 94  | 6 | 0 | 5.427443   | 0.329954  | 0.945772  |
| 28                    | 6      | 0      | 1.177876 1.287956 -0.307781   | 95  | 1 | 0 | 5.401396   | 1.306049  | 1.437205  |
| 29                    | 6      | 0      | 2.339622 0.489951 -0.279552   | 96  | 1 | 0 | 4.915448   | -0.379419 | 1.603306  |
| 30                    | 6      | 0      | 3.582103 1.136306 -0.318572   | 97  | 6 | 0 | -5.570677  | 0.175913  | -0.861526 |
| 31                    | 6      | 0      | 3.642275 2.539653 -0.411664   | 98  | 1 | 0 | -5.617577  | 1.093689  | -1.452605 |
| 32                    | 6      | 0      | 2.484644 3.297736 -0.439936   | 99  | 1 | 0 | -5.144134  | -0.602805 | -1.501539 |
| 33                    | 6      | 0      | 1.229297 2.682248 -0.380715   | 100 | 6 | 0 | 6.858734   | -0.096266 | 0.692322  |
| 34                    | 6      | 0      | -2.254933 -1.033986 0.075943  | 101 | 6 | 0 | 7.784493   | -0.397719 | 1.714349  |
| 35                    | 6      | 0      | -1.453528 -1.104999 2.392858  | 102 | 6 | 0 | 7.323582   | -0.213078 | -0.623300 |
| 36                    | 6      | 0      | -1.871719 -1.326705 3.835072  | 103 | 6 | 0 | 9.097118   | -0.794462 | 1.440156  |
| 37                    | 6      | 0      | -1.147126 -2.174883 4.679616  | 104 | 6 | 0 | 8.632692   | -0.601360 | -0.908712 |
| 38                    | 6      | 0      | -1.554369 -2.327293 6.005887  | 105 | 1 | 0 | 6.636603   | 0.002482  | -1.431104 |
| 39                    | 6      | 0      | -2.675111 -1.626528 6.445190  | 106 | 6 | 0 | 9.526165   | -0.894410 | 0.123069  |
| 40                    | 6      | 0      | -3.334942 -0.802009 5.530671  | 107 | 1 | 0 | 9.760346   | -1.012685 | 2.266971  |
| 41                    | 6      | 0      | -2.513365 -3.040662 1.400540  | 108 | 1 | 0 | 8.952813   | -0.673915 | -1.943811 |
| 42                    | 6      | 0      | -3.743044 -3.597511 0.708456  | 109 | 1 | 0 | 10.545739  | -1.195843 | -0.093419 |
| 43                    | 1      | 0      | -6.957439 -3.741412 1.286134  | 110 | 7 | 0 | 7.418823   | -0.301919 | 3.128378  |
| 44                    | 1      | 0      | -6.939664 -5.024097 -0.850114 | 111 | 8 | 0 | 8.211793   | -0.724988 | 3.972628  |
| 45                    | 1      | 0      | 0.475876 -3.186406 -4.286650  | 112 | 8 | 0 | 6.329999   | 0.204743  | 3.422444  |
| 46                    | 1      | 0      | 1.285335 -3.697715 -6.598062  | 113 | 6 | 0 | -6.951812  | -0.217661 | -0.378033 |
| 47                    | 1      | 0      | 3.309034 -2.470749 -7.457974  | 114 | 6 | 0 | -8.024918  | -0.548386 | -1.233663 |
| 48                    | 1      | 0      | 4.404781 -0.802148 -5.966413  | 115 | 6 | 0 | -7.211965  | -0.272308 | 0.996924  |
| 49                    | 7      | 0      | -2.465525 -1.570432 1.433567  | 116 | 6 | 0 | -9.284879  | -0.909371 | -0.745261 |
| 50                    | 7      | 0      | 2.547540 -1.688810 -1.494179  | 117 | 6 | 0 | -8.465201  | -0.629017 | 1.494908  |
| 51                    | 7      | 0      | -2.953689 -0.645107 4.257463  | 118 | 1 | 0 | -6.408171  | -0.033429 | 1.680791  |
| 52                    | 7      | 0      | 5.055715 -3.432185 -1.183455  | 119 | 6 | 0 | -9.508651  | -0.949183 | 0.624642  |
| 53                    | 6      | 0      | -6.020908 -3.914798 0.758717  | 120 | 1 | 0 | -10.068802 | -1.150831 | -1.450987 |
| 54                    | 6      | 0      | -6.014191 -4.632983 -0.439342 | 121 | 1 | 0 | -8.623554  | -0.655369 | 2.568868  |
| 55                    | 6      | 0      | -4.792466 -4.829958 -1.079088 | 122 | 1 | 0 | -10.485812 | -1.226347 | 1.006248  |
| 56                    | 6      | 0      | 2.266581 -1.022254 -0.208311  | 123 | 7 | 0 | -7.876944  | -0.526853 | -2.689893 |
| 57                    | 6      | 0      | 2.639581 -3.145375 -1.301847  | 124 | 8 | 0 | -8.827560  | -0.892480 | -3.385146 |
| 58                    | 6      | 0      | 3.879633 -3.582166 -0.545280  | 125 | 8 | 0 | -6.804181  | -0.141055 | -3.168428 |
| 59                    | 6      | 0      | 3.790568 -4.142842 0.734021   |     |   |   |            |           |           |
| 60                    | 6      | 0      | 4.955886 -4.561179 1.378005   |     |   |   |            |           |           |
| 61                    | 6      | 0      | 6.174370 -4.405929 0.720907   |     |   |   |            |           |           |
| 62                    | 6      | 0      | 6.165882 -3.836664 -0.554632  |     |   |   |            |           |           |

**Optimized Coordinates of 1-b at the CPCM(H<sub>2</sub>O)-B3LYP/6-31G(d) level.**

$E = -4349.294769$

Sum of electronic and thermal free energies =  $-4348.448758$

| ----- Standard orientation: ----- |        |        |                         |           |           |     | 62 | 6 | 0         | 5.734444  | -4.092551 | -1.140863 |
|-----------------------------------|--------|--------|-------------------------|-----------|-----------|-----|----|---|-----------|-----------|-----------|-----------|
| Center                            | Atomic | Atomic | Coordinates (Angstroms) |           |           | 63  | 6  | 0 | 1.463522  | -0.871839 | -2.610057 |           |
| Number                            | Number | Type   | X                       | Y         | Z         | 64  | 6  | 0 | 1.862652  | -1.238240 | -4.027898 |           |
| -----                             |        |        |                         |           |           |     | 65 | 6 | 0         | 1.047843  | -2.050369 | -4.824561 |
| -----                             |        |        |                         |           |           |     | 66 | 6 | 0         | 1.441795  | -2.338577 | -6.132055 |
| 1                                 | 17     | 0      | -5.172832               | 3.661627  | 0.124462  | 67  | 6  | 0 | 2.639826  | -1.805184 | -6.601517 |           |
| 2                                 | 17     | 0      | 5.227974                | 3.578816  | -0.696720 | 68  | 6  | 0 | 3.386142  | -1.002818 | -5.734986 |           |
| 3                                 | 8      | 0      | -4.712874               | 0.657108  | 0.061322  | 69  | 1  | 0 | -3.065468 | -1.199567 | -0.366258 |           |
| 4                                 | 8      | 0      | 0.010133                | 0.888975  | -0.232604 | 70  | 1  | 0 | -1.303394 | -1.087743 | -0.321755 |           |
| 5                                 | 8      | 0      | 4.741607                | 0.612207  | -0.255066 | 71  | 1  | 0 | -1.238970 | 0.531322  | 2.193926  |           |
| 6                                 | 6      | 0      | -0.041288               | 5.751250  | -1.810424 | 72  | 1  | 0 | -0.273464 | -0.950201 | 2.227206  |           |
| 7                                 | 1      | 0      | 0.050208                | 8.333077  | -0.504722 | 73  | 1  | 0 | 0.112713  | -1.894699 | 4.372495  |           |
| 8                                 | 1      | 0      | 0.187188                | 8.559066  | 1.986982  | 74  | 1  | 0 | -0.456943 | -2.024104 | 6.805457  |           |
| 9                                 | 1      | 0      | 0.245643                | 6.544981  | 3.417369  | 75  | 1  | 0 | -2.518961 | -0.829123 | 7.618473  |           |
| 10                                | 1      | 0      | 0.171363                | 4.266938  | 2.424849  | 76  | 1  | 0 | -3.889632 | 0.428863  | 5.960799  |           |
| 11                                | 1      | 0      | -2.559509               | 4.662978  | -0.216150 | 77  | 1  | 0 | -2.040311 | -2.863229 | 2.705158  |           |
| 12                                | 1      | 0      | 2.610501                | 4.622838  | -0.608520 | 78  | 1  | 0 | -1.443126 | -3.028748 | 1.050886  |           |
| 13                                | 8      | 0      | -0.049923               | 4.382264  | -1.844368 | 79  | 1  | 0 | 3.041884  | -1.167884 | 0.362521  |           |
| 14                                | 8      | 0      | -0.091751               | 6.416972  | -2.821363 | 80  | 1  | 0 | 1.288576  | -1.052225 | 0.183672  |           |
| 15                                | 6      | 0      | 0.036903                | 6.173553  | -0.398731 | 81  | 1  | 0 | 2.182461  | -3.240156 | -2.512403 |           |
| 16                                | 6      | 0      | 0.077219                | 7.460111  | 0.139937  | 82  | 1  | 0 | 1.399725  | -3.139786 | -0.931555 |           |
| 17                                | 6      | 0      | 0.153314                | 7.576310  | 1.526994  | 83  | 1  | 0 | 2.486404  | -4.300022 | 0.831497  |           |
| 18                                | 6      | 0      | 0.186579                | 6.430591  | 2.339032  | 84  | 1  | 0 | 6.636377  | -5.371155 | 0.347631  |           |
| 19                                | 6      | 0      | 0.145332                | 5.146090  | 1.788349  | 85  | 1  | 0 | 6.642487  | -4.003269 | -1.734897 |           |
| 20                                | 6      | 0      | 0.070021                | 5.038003  | 0.402998  | 86  | 1  | 0 | 1.464362  | 0.218953  | -2.544172 |           |
| 21                                | 6      | 0      | 0.015654                | 3.797676  | -0.476762 | 87  | 1  | 0 | 0.429930  | -1.211263 | -2.419191 |           |
| 22                                | 6      | 0      | -1.231377               | 2.965479  | -0.273963 | 88  | 7  | 0 | 3.018685  | -0.716775 | -4.480246 |           |
| 23                                | 6      | 0      | -2.484376               | 3.581741  | -0.191218 | 89  | 6  | 0 | -3.641824 | -4.206740 | 0.244444  |           |
| 24                                | 6      | 0      | -3.636881               | 2.826374  | -0.067840 | 90  | 1  | 0 | -2.773631 | -4.379386 | -0.384691 |           |
| 25                                | 6      | 0      | -3.581249               | 1.416240  | -0.032671 | 91  | 7  | 0 | -4.612449 | -3.054775 | 2.118858  |           |
| 26                                | 6      | 0      | -2.331456               | 0.776108  | -0.035379 | 92  | 1  | 0 | -4.919377 | -5.596787 | -0.805151 |           |
| 27                                | 6      | 0      | -1.177307               | 1.573170  | -0.185361 | 93  | 1  | 0 | 4.502048  | -5.519438 | 1.675900  |           |
| 28                                | 6      | 0      | 1.204258                | 1.557995  | -0.311561 | 94  | 6  | 0 | 5.622499  | 0.840694  | 0.883729  |           |
| 29                                | 6      | 0      | 2.357878                | 0.746034  | -0.289068 | 95  | 1  | 0 | 6.630988  | 0.912878  | 0.485646  |           |
| 30                                | 6      | 0      | 3.611503                | 1.377574  | -0.317907 | 96  | 1  | 0 | 5.363467  | 1.787280  | 1.359828  |           |
| 31                                | 6      | 0      | 3.677819                | 2.779998  | -0.466964 | 97  | 6  | 0 | -5.658602 | 0.755540  | -1.043799 |           |
| 32                                | 6      | 0      | 2.527487                | 3.547710  | -0.496297 | 98  | 1  | 0 | -6.630398 | 0.979579  | -0.611134 |           |
| 33                                | 6      | 0      | 1.266618                | 2.949969  | -0.398316 | 99  | 1  | 0 | -5.366468 | 1.578268  | -1.697975 |           |
| 34                                | 6      | 0      | -2.228958               | -0.723980 | 0.151096  | 100 | 6  | 0 | 5.489134  | -0.260799 | 1.913697  |           |
| 35                                | 6      | 0      | -1.278366               | -0.536040 | 2.424003  | 101 | 6  | 0 | 6.245440  | -1.448560 | 1.946065  |           |
| 36                                | 6      | 0      | -1.598806               | -0.667485 | 3.902003  | 102 | 6  | 0 | 4.579375  | -0.070660 | 2.962761  |           |
| 37                                | 6      | 0      | -0.768579               | -1.394034 | 4.762681  | 103 | 6  | 0 | 6.109830  | -2.390561 | 2.968548  |           |
| 38                                | 6      | 0      | -1.087178               | -1.464817 | 6.119783  | 104 | 6  | 0 | 4.410496  | -1.014286 | 3.976367  |           |
| 39                                | 6      | 0      | -2.227514               | -0.806017 | 6.573121  | 105 | 1  | 0 | 3.999102  | 0.847082  | 2.986760  |           |
| 40                                | 6      | 0      | -2.994712               | -0.103108 | 5.640780  | 106 | 6  | 0 | 5.179631  | -2.178597 | 3.980794  |           |
| 41                                | 6      | 0      | -2.262850               | -2.610769 | 1.663592  | 107 | 1  | 0 | 6.725569  | -3.280337 | 2.950953  |           |
| 42                                | 6      | 0      | -3.565038               | -3.303324 | 1.309836  | 108 | 1  | 0 | 3.688253  | -0.832563 | 4.766172  |           |
| 43                                | 1      | 0      | -6.584881               | -3.479268 | 2.549992  | 109 | 1  | 0 | 5.062423  | -2.916243 | 4.767915  |           |
| 44                                | 1      | 0      | -6.876063               | -5.136032 | 0.711763  | 110 | 7  | 0 | 7.232811  | -1.763342 | 0.905859  |           |
| 45                                | 1      | 0      | 0.120614                | -2.448863 | -4.423331 | 111 | 8  | 0 | 8.126620  | -2.566425 | 1.183447  |           |
| 46                                | 1      | 0      | 0.824952                | -2.967759 | -6.767511 | 112 | 8  | 0 | 7.117499  | -1.232344 | -0.201143 |           |
| 47                                | 1      | 0      | 2.990812                | -1.998715 | -7.610276 | 113 | 6  | 0 | -5.677831 | -0.516146 | -1.864599 |           |
| 48                                | 1      | 0      | 4.324889                | -0.563887 | -6.070225 | 114 | 6  | 0 | -6.494936 | -1.636816 | -1.618291 |           |
| 49                                | 7      | 0      | -2.309699               | -1.143624 | 1.568362  | 115 | 6  | 0 | -4.866731 | -0.573411 | -3.005926 |           |
| 50                                | 7      | 0      | -2.412091               | -1.383074 | -1.607302 | 116 | 6  | 0 | -6.511193 | -2.747775 | -2.464563 |           |
| 51                                | 7      | 0      | -2.699483               | -0.025578 | 4.337826  | 117 | 6  | 0 | -4.849888 | -1.686509 | -3.846930 |           |
| 52                                | 7      | 0      | 4.660873                | -3.443084 | -1.605881 | 118 | 1  | 0 | -4.242903 | 0.283448  | -3.243037 |           |
| 53                                | 6      | 0      | -5.757245               | -3.704477 | 1.879265  | 119 | 6  | 0 | -5.676512 | -2.777818 | -3.576951 |           |
| 54                                | 6      | 0      | -5.924196               | -4.633077 | 0.848582  | 120 | 1  | 0 | -7.167617 | -3.576704 | -2.234197 |           |
| 55                                | 6      | 0      | -4.838883               | -4.885523 | 0.011921  | 121 | 1  | 0 | -4.200565 | -1.693945 | -4.716858 |           |
| 56                                | 6      | 0      | 2.248855                | -0.764729 | -0.271586 | 122 | 1  | 0 | -5.677326 | -3.645914 | -4.227943 |           |
| 57                                | 6      | 0      | 2.302592                | -2.845968 | -1.498322 | 123 | 7  | 0 | -7.387232 | -1.698207 | -0.454005 |           |
| 58                                | 6      | 0      | 3.518282                | -3.525916 | -0.898442 | 124 | 8  | 0 | -8.337785 | -2.482960 | -0.495755 |           |
| 59                                | 6      | 0      | 3.426868                | -4.258792 | 0.289972  | 125 | 8  | 0 | -7.140483 | -0.982662 | 0.519449  |           |
| 60                                | 6      | 0      | 4.551578                | -4.938748 | 0.759174  |     |    |   |           |           |           |           |
| 61                                | 6      | 0      | 5.734909                | -4.858478 | 0.027761  |     |    |   |           |           |           |           |

**Optimized Coordinates of 1-a at the B3LYP/6-31G(d) level.**

$E = -4349.260154$

Sum of electronic and thermal free energies =  $-4348.418465$

| Standard orientation: |        |        |                               | 62  | 6 | 0 | 5.320923   | -4.284259 | 0.989068  |
|-----------------------|--------|--------|-------------------------------|-----|---|---|------------|-----------|-----------|
| -----                 |        |        |                               | 63  | 6 | 0 | 2.156452   | -1.168057 | -2.481729 |
| Center                | Atomic | Atomic | Coordinates (Angstroms)       | 64  | 6 | 0 | 2.943439   | -1.692264 | -3.670244 |
| Number                | Number | Type   | X Y Z                         | 65  | 6 | 0 | 2.336953   | -2.495749 | -4.642270 |
| -----                 |        |        |                               | 66  | 6 | 0 | 3.086799   | -2.923235 | -5.738282 |
| 1                     | 17     | 0      | -5.213268 3.567349 -0.011759  | 67  | 6 | 0 | 4.420814   | -2.535110 | -5.825659 |
| 2                     | 17     | 0      | 5.214317 3.506747 -0.510882   | 68  | 6 | 0 | 4.938583   | -1.731924 | -4.806234 |
| 3                     | 8      | 0      | -4.727070 0.586811 0.106202   | 69  | 1 | 0 | -2.954317  | -1.221517 | -0.860041 |
| 4                     | 8      | 0      | -0.014244 0.804778 -0.232598  | 70  | 1 | 0 | -4.1259897 | -1.117928 | -0.389126 |
| 5                     | 8      | 0      | 4.710472 0.539780 -0.250915   | 71  | 1 | 0 | -2.050243  | 0.221159  | 2.249792  |
| 6                     | 6      | 0      | -0.027884 5.689238 -1.776752  | 72  | 1 | 0 | -0.948041  | -1.156343 | 2.423000  |
| 7                     | 1      | 0      | 0.020202 8.244457 -0.431841   | 73  | 1 | 0 | -1.056253  | -2.312203 | 4.492467  |
| 8                     | 1      | 0      | 0.083146 8.440689 2.072032    | 74  | 1 | 0 | -2.267761  | -2.813257 | 6.624734  |
| 9                     | 1      | 0      | 0.103810 6.406790 3.475163    | 75  | 1 | 0 | -4.619395  | -1.956656 | 6.894941  |
| 10                    | 1      | 0      | 0.063596 4.143447 2.446692    | 76  | 1 | 0 | -5.624275  | -0.646773 | 5.022758  |
| 11                    | 1      | 0      | -2.588896 4.577064 -0.306587  | 77  | 1 | 0 | -2.742574  | -3.294362 | 2.113690  |
| 12                    | 1      | 0      | 2.585407 4.549930 -0.512782   | 78  | 1 | 0 | -1.412604  | -3.149027 | 0.943748  |
| 13                    | 8      | 0      | -0.035131 4.314317 -1.822038  | 79  | 1 | 0 | 2.864600   | -1.133304 | 0.809151  |
| 14                    | 8      | 0      | -0.047986 6.374042 -2.767770  | 80  | 1 | 0 | 1.204967   | -1.089552 | 0.219464  |
| 15                    | 6      | 0      | 0.008255 6.088714 -0.350659   | 81  | 1 | 0 | 2.818373   | -3.551494 | -1.902314 |
| 16                    | 6      | 0      | 0.030074 7.366517 0.206902    | 82  | 1 | 0 | 1.419125   | -3.259510 | -0.847302 |
| 17                    | 6      | 0      | 0.064874 7.464097 1.597093    | 83  | 1 | 0 | 1.560974   | -3.927365 | 1.439254  |
| 18                    | 6      | 0      | 0.076628 6.307783 2.393534    | 84  | 1 | 0 | 5.402166   | -5.160589 | 2.962397  |
| 19                    | 6      | 0      | 0.054332 5.032440 1.822530    | 85  | 1 | 0 | 6.392789   | -4.361276 | 0.813596  |
| 20                    | 6      | 0      | 0.019981 4.943024 0.433945    | 86  | 1 | 0 | 2.202139   | -0.075911 | -2.512217 |
| 21                    | 6      | 0      | -0.007341 3.717847 -0.471254  | 87  | 1 | 0 | 1.091197   | -1.452457 | -2.595346 |
| 22                    | 6      | 0      | -1.259345 2.880686 -0.304920  | 88  | 7 | 0 | 4.230302   | -1.314112 | -3.754051 |
| 23                    | 6      | 0      | -2.515034 3.496241 -0.262677  | 89  | 6 | 0 | -2.778802  | -4.151209 | -1.060988 |
| 24                    | 6      | 0      | -3.671801 2.744268 -0.148915  | 90  | 1 | 0 | -1.712611  | -4.054887 | -1.247822 |
| 25                    | 6      | 0      | -3.610876 1.337985 -0.092919  | 91  | 7 | 0 | -4.648306  | -3.702085 | 0.379266  |
| 26                    | 6      | 0      | -2.365773 0.692507 -0.130898  | 92  | 1 | 0 | -3.193795  | -5.247700 | -2.875414 |
| 27                    | 6      | 0      | -1.205122 1.487262 -0.228373  | 93  | 1 | 0 | 2.915960   | -4.937975 | 3.285528  |
| 28                    | 6      | 0      | 1.181091 1.478291 -0.265642   | 94  | 6 | 0 | 5.506093   | 0.489046  | 0.943052  |
| 29                    | 6      | 0      | 2.338468 0.676276 -0.189074   | 95  | 1 | 0 | 5.821113   | 1.493241  | 1.235746  |
| 30                    | 6      | 0      | 3.588785 1.310069 -0.236402   | 96  | 1 | 0 | 4.910781   | 0.080482  | 1.767949  |
| 31                    | 6      | 0      | 3.659706 2.711405 -0.361549   | 97  | 6 | 0 | -5.621019  | 0.379247  | -0.998748 |
| 32                    | 6      | 0      | 2.505078 3.473336 -0.412396   | 98  | 1 | 0 | -5.977171  | 1.335028  | -1.389524 |
| 33                    | 6      | 0      | 1.243700 2.870282 -0.358208   | 99  | 1 | 0 | -5.092033  | -0.128951 | -1.813045 |
| 34                    | 6      | 0      | -2.280262 -0.821149 -0.095978 | 100 | 6 | 0 | 6.702653   | -0.394162 | 0.651215  |
| 35                    | 6      | 0      | -2.015980 -0.866883 2.352882  | 101 | 6 | 0 | 7.810880   | -0.526290 | 1.512104  |
| 36                    | 6      | 0      | -2.719502 -1.224806 3.650117  | 102 | 6 | 0 | 6.739169   | -1.124245 | -0.544958 |
| 37                    | 6      | 0      | -2.073598 -1.963365 4.647807  | 103 | 6 | 0 | 8.912170   | -1.325339 | 1.193478  |
| 38                    | 6      | 0      | -2.749465 -2.240693 5.836485  | 104 | 6 | 0 | 7.829123   | -1.933276 | -0.864478 |
| 39                    | 6      | 0      | -4.050607 -1.769905 5.988962  | 105 | 1 | 0 | 5.894857   | -1.061576 | -1.221130 |
| 40                    | 6      | 0      | -4.611673 -1.039202 4.938237  | 106 | 6 | 0 | 8.922035   | -2.033663 | -0.001418 |
| 41                    | 6      | 0      | -2.478184 -2.894998 1.129824  | 107 | 1 | 0 | 9.736603   | -1.374345 | 1.893397  |
| 42                    | 6      | 0      | -3.337921 -3.604352 0.100443  | 108 | 1 | 0 | 7.816051   | -2.490903 | -1.796563 |
| 43                    | 1      | 0      | -6.488099 -4.385698 -0.241464 | 109 | 1 | 0 | 9.773327   | -2.659364 | -0.252676 |
| 44                    | 1      | 0      | -5.650854 -5.416728 -2.356625 | 110 | 7 | 0 | 7.861965   | 0.163034  | 2.807933  |
| 45                    | 1      | 0      | 1.292336 -2.776831 -4.540080  | 111 | 8 | 0 | 8.926639   | 0.167069  | 3.425246  |
| 46                    | 1      | 0      | 2.636106 -3.546810 -6.505901  | 112 | 8 | 0 | 6.827555   | 0.696257  | 3.223471  |
| 47                    | 1      | 0      | 5.047167 -2.839035 -6.659030  | 113 | 6 | 0 | -6.773094  | -0.464583 | -0.489743 |
| 48                    | 1      | 0      | 5.975694 -1.400863 -4.842666  | 114 | 6 | 0 | -7.942538  | -0.729742 | -1.230709 |
| 49                    | 7      | 0      | -2.672142 -1.443709 1.179432  | 115 | 6 | 0 | -6.701359  | -1.017315 | 0.796706  |
| 50                    | 7      | 0      | 2.715042 -1.602849 -1.201219  | 116 | 6 | 0 | -8.997346  | -1.487658 | -0.715243 |
| 51                    | 7      | 0      | -3.974244 -0.766214 3.796929  | 117 | 6 | 0 | -7.745144  | -1.783362 | 1.314455  |
| 52                    | 7      | 0      | 4.605840 -3.749407 -0.004956  | 118 | 1 | 0 | -5.808296  | -0.851877 | 1.387168  |
| 53                    | 6      | 0      | -5.431329 -4.335601 -0.498939 | 119 | 6 | 0 | -8.899139  | -2.018214 | 0.564856  |
| 54                    | 6      | 0      | -4.965314 -4.910725 -1.683514 | 120 | 1 | 0 | -9.871954  | -1.644759 | -1.333538 |
| 55                    | 6      | 0      | -3.605113 -4.815437 -1.967044 | 121 | 1 | 0 | -7.646764  | -2.202303 | 2.311805  |
| 56                    | 6      | 0      | 2.244478 -0.829831 -0.040865  | 122 | 1 | 0 | -9.714418  | -2.610728 | 0.969337  |
| 57                    | 6      | 0      | 2.497681 -3.035704 -0.992081  | 123 | 7 | 0 | -8.112397  | -0.229763 | -2.601782 |
| 58                    | 6      | 0      | 3.279629 -3.623511 0.168001   | 124 | 8 | 0 | -9.217863  | -0.342655 | -3.130817 |
| 59                    | 6      | 0      | 2.637108 -4.041875 1.339700   | 125 | 8 | 0 | -7.132194  | 0.270317  | -3.163084 |
| 60                    | 6      | 0      | 3.393145 -4.604696 2.367628   |     |   |   |            |           |           |
| 61                    | 6      | 0      | 4.769150 -4.729345 2.192688   |     |   |   |            |           |           |

**Optimized Coordinates of 1-b at the B3LYP/6-31G(d) level.**

$E = -4349.238096$

Sum of electronic and thermal free energies =  $-4348.393169$

| Standard orientation: |               |             |                              | 62  | 6 | 0 | -5.715798 | -3.809317 | 1.806924  |
|-----------------------|---------------|-------------|------------------------------|-----|---|---|-----------|-----------|-----------|
|                       |               |             |                              | 63  | 6 | 0 | -1.351904 | -0.469020 | 2.854601  |
|                       |               |             |                              | 64  | 6 | 0 | -1.781309 | -0.527182 | 4.308966  |
| Center Number         | Atomic Number | Atomic Type | Coordinates (Angstroms)      | 65  | 6 | 0 | -1.148034 | -1.368775 | 5.230638  |
|                       |               |             | X Y Z                        | 66  | 6 | 0 | -1.581463 | -1.374715 | 6.556869  |
| 1                     | 17            | 0           | 5.251123 3.349197 -1.139648  | 67  | 6 | 0 | -2.631486 | -0.535467 | 6.918426  |
| 2                     | 17            | 0           | -5.034753 3.720641 0.236458  | 68  | 6 | 0 | -3.192751 | 0.278115  | 5.930111  |
| 3                     | 8             | 0           | 4.752618 0.392534 -0.578814  | 69  | 1 | 0 | 3.140886  | -1.337224 | 0.193852  |
| 4                     | 8             | 0           | 0.102549 0.840763 0.229849   | 70  | 1 | 0 | 1.395631  | -1.161425 | 0.438679  |
| 5                     | 8             | 0           | -4.637404 0.704280 0.229263  | 71  | 1 | 0 | 0.987030  | 0.173649  | -2.225931 |
| 6                     | 6             | 0           | 0.411457 5.678074 1.459753   | 72  | 1 | 0 | -0.023166 | -1.268544 | -2.001045 |
| 7                     | 1             | 0           | 0.342437 8.262859 0.177494   | 73  | 1 | 0 | -0.418928 | -2.704768 | -3.934500 |
| 8                     | 1             | 0           | 0.070729 8.522805 -2.306838  | 74  | 1 | 0 | -0.109822 | -3.071115 | -6.393804 |
| 9                     | 1             | 0           | -0.146474 6.525499 -3.745765 | 75  | 1 | 0 | 1.608422  | -1.686423 | -7.602767 |
| 10                    | 1             | 0           | -0.104959 4.237616 -2.771626 | 76  | 1 | 0 | 2.907829  | -0.003659 | -6.293731 |
| 11                    | 1             | 0           | 2.731013 4.475125 -0.613824  | 77  | 1 | 0 | 1.672216  | -3.297100 | -2.484874 |
| 12                    | 1             | 0           | -2.388875 4.661994 0.081525  | 78  | 1 | 0 | 1.121944  | -3.228224 | -0.798253 |
| 13                    | 8             | 0           | 0.364257 4.305972 1.479321   | 79  | 1 | 0 | -3.017865 | -1.191902 | 0.008589  |
| 14                    | 8             | 0           | 0.556215 6.341951 2.455415   | 80  | 1 | 0 | -1.251809 | -1.113488 | 0.104891  |
| 15                    | 6             | 0           | 0.261327 6.111307 0.050481   | 81  | 1 | 0 | -2.247074 | -2.778696 | 3.176322  |
| 16                    | 6             | 0           | 0.241979 7.401923 -0.476383  | 82  | 1 | 0 | -1.364012 | -2.985778 | 1.650782  |
| 17                    | 6             | 0           | 0.091015 7.534880 -1.855968  | 83  | 1 | 0 | -2.442848 | -4.225940 | -0.086918 |
| 18                    | 6             | 0           | -0.033289 6.399540 -2.672533 | 84  | 1 | 0 | -6.620368 | -5.181236 | 0.403084  |
| 19                    | 6             | 0           | -0.012347 5.110707 -2.132077 | 85  | 1 | 0 | -6.629985 | -3.654953 | 2.377237  |
| 20                    | 6             | 0           | 0.135824 4.985907 -0.753360  | 86  | 1 | 0 | -1.286367 | 0.586888  | 2.588517  |
| 21                    | 6             | 0           | 0.191200 3.740605 0.118855   | 87  | 1 | 0 | -0.338980 | -0.904527 | 2.745778  |
| 22                    | 6             | 0           | 1.384609 2.853884 -0.162473  | 88  | 7 | 0 | -2.785286 | 0.293529  | 4.659196  |
| 23                    | 6             | 0           | 2.629564 3.403794 -0.483730  | 89  | 6 | 0 | 3.336674  | -4.293703 | 0.152376  |
| 24                    | 6             | 0           | 3.742838 2.596519 -0.644048  | 90  | 1 | 0 | 2.528550  | -4.230902 | 0.076522  |
| 25                    | 6             | 0           | 3.655198 1.197523 -0.470682  | 91  | 7 | 0 | 4.173257  | -3.727916 | -2.028365 |
| 26                    | 6             | 0           | 2.398967 0.611906 -0.238214  | 92  | 1 | 0 | 4.622534  | -5.506689 | 1.397384  |
| 27                    | 6             | 0           | 1.291347 1.464545 -0.055832  | 93  | 1 | 0 | -4.464475 | -5.489696 | -0.857542 |
| 28                    | 6             | 0           | -1.075081 1.547173 0.219852  | 94  | 6 | 0 | -5.435908 | 0.743161  | -0.979315 |
| 29                    | 6             | 0           | -2.250682 0.774372 0.312000  | 95  | 1 | 0 | -6.457030 | 0.577878  | -0.652867 |
| 30                    | 6             | 0           | -3.485919 1.437930 0.221690  | 96  | 1 | 0 | -5.364286 | 1.730539  | -1.440616 |
| 31                    | 6             | 0           | -3.511589 2.849039 0.164865  | 97  | 6 | 0 | 5.777509  | 0.556531  | 0.434422  |
| 32                    | 6             | 0           | -2.336985 3.579595 0.111329  | 98  | 1 | 0 | 6.686285  | 0.185235  | -0.026373 |
| 33                    | 6             | 0           | -1.093506 2.939432 0.110271  | 99  | 1 | 0 | 5.902104  | 1.615658  | 0.668461  |
| 34                    | 6             | 0           | 2.235499 -0.894034 -0.225533 | 100 | 6 | 0 | -4.976155 | -0.291035 | -1.991332 |
| 35                    | 6             | 0           | 0.963828 -0.909448 -2.351874 | 101 | 6 | 0 | -5.497978 | -1.588945 | -2.150201 |
| 36                    | 6             | 0           | 1.103036 -1.175967 -3.839570 | 102 | 6 | 0 | -3.945092 | 0.077926  | -2.869388 |
| 37                    | 6             | 0           | 0.313774 -2.129539 -4.494586 | 103 | 6 | 0 | -5.020537 | -2.465445 | -3.127099 |
| 38                    | 6             | 0           | 0.484816 -2.330459 -5.865008 | 104 | 6 | 0 | -3.435910 | -0.794876 | -3.829395 |
| 39                    | 6             | 0           | 1.435078 -1.566974 -6.537449 | 105 | 1 | 0 | -3.537972 | 1.081880  | -2.791177 |
| 40                    | 6             | 0           | 2.163814 -0.628614 -5.801539 | 106 | 6 | 0 | -3.977363 | -2.074345 | -3.959056 |
| 41                    | 6             | 0           | 1.942062 -2.938116 -1.487900 | 107 | 1 | 0 | -5.478595 | -3.442057 | -3.215764 |
| 42                    | 6             | 0           | 3.211282 -3.667146 -1.092872 | 108 | 1 | 0 | -2.624947 | -0.475477 | -4.477467 |
| 43                    | 1             | 0           | 6.053186 -4.414638 -2.510393 | 109 | 1 | 0 | -3.599598 | -2.761115 | -4.710531 |
| 44                    | 1             | 0           | 6.438667 -5.582353 -0.338601 | 110 | 7 | 0 | -6.601298 | -2.105292 | -1.312134 |
| 45                    | 1             | 0           | -0.329053 -2.007526 4.910057 | 111 | 8 | 0 | -7.225541 | -3.077797 | -1.739530 |
| 46                    | 1             | 0           | -1.107793 -2.022524 7.290101 | 112 | 8 | 0 | -6.830312 | -1.559285 | -0.235328 |
| 47                    | 1             | 0           | -3.006283 -0.502223 7.937139 | 113 | 6 | 0 | 5.435068  | -0.177667 | 1.718274  |
| 48                    | 1             | 0           | -4.008115 0.957040 6.176171  | 114 | 6 | 0 | 5.821401  | -1.488505 | 2.060329  |
| 49                    | 7             | 0           | 2.069538 -1.479290 -1.571619 | 115 | 6 | 0 | 4.673280  | 0.515901  | 2.671357  |
| 50                    | 7             | 0           | -2.325423 -1.105141 1.957631 | 116 | 6 | 0 | 5.464455  | -2.071882 | 3.278268  |
| 51                    | 7             | 0           | 2.007762 -0.426248 -4.491002 | 117 | 6 | 0 | 4.289436  | -0.060217 | 3.880999  |
| 52                    | 7             | 0           | -4.640274 -3.145475 2.236454 | 118 | 1 | 0 | 4.380677  | 1.538815  | 2.452865  |
| 53                    | 6             | 0           | 5.290136 -4.397074 -1.734006 | 119 | 6 | 0 | 4.685043  | -1.362757 | 4.185587  |
| 54                    | 6             | 0           | 5.506780 -5.057634 -0.521422 | 120 | 1 | 0 | 5.809814  | -3.074907 | 3.492946  |
| 55                    | 6             | 0           | 4.501828 -5.005968 0.440299  | 121 | 1 | 0 | 3.692488  | 0.512068  | 4.585100  |
| 56                    | 6             | 0           | -2.187574 -0.722218 0.540052 | 122 | 1 | 0 | 4.400725  | -1.821690 | 5.127638  |
| 57                    | 6             | 0           | -2.284925 -2.562835 2.104763 | 123 | 7 | 0 | 6.657979  | -2.323811 | 1.172596  |
| 58                    | 6             | 0           | -3.493423 -3.293789 1.553181 | 124 | 8 | 0 | 7.215441  | -3.300532 | 1.676677  |
| 59                    | 6             | 0           | -3.392522 -4.125945 0.432210 | 125 | 8 | 0 | 6.748828  | -2.018751 | -0.014521 |
| 60                    | 6             | 0           | -4.519487 -4.829206 0.004237 |     |   |   |           |           |           |
| 61                    | 6             | 0           | -5.712570 -4.668402 0.703585 |     |   |   |           |           |           |

**Optimized Coordinates of 1-a at the CPCM(H<sub>2</sub>O)-B3LYP/SVP level.**

$E = -4346.563925$

Sum of electronic and thermal free energies =  $-4345.725283$

| Standard orientation: |        |        |                               | 61  | 6 | 0 | 6.187777   | -4.509985 | 1.343677  |
|-----------------------|--------|--------|-------------------------------|-----|---|---|------------|-----------|-----------|
| -----                 |        |        |                               | 62  | 6 | 0 | 6.231167   | -4.009757 | 0.037104  |
| Center                | Atomic | Atomic | Coordinates (Angstroms)       | 63  | 6 | 0 | 1.865678   | -1.595549 | -2.327823 |
| Number                | Number | Type   | X Y Z                         | 64  | 6 | 0 | 2.601017   | -1.925744 | -3.615018 |
| -----                 |        |        |                               | 65  | 6 | 0 | 2.092216   | -2.862892 | -4.525715 |
| 1                     | 17     | 0      | -5.250020 3.154829 -0.228180  | 66  | 6 | 0 | 2.794751   | -3.118792 | -5.706594 |
| 2                     | 17     | 0      | 5.200494 3.172469 -0.486159   | 67  | 6 | 0 | 3.984941   | -2.429553 | -5.939463 |
| 3                     | 8      | 0      | -4.735910 0.187338 -0.033727  | 68  | 6 | 0 | 4.413506   | -1.511145 | -4.973834 |
| 4                     | 8      | 0      | -0.015676 0.459436 -0.170352  | 69  | 1 | 0 | -2.985469  | -1.648726 | -0.670967 |
| 5                     | 8      | 0      | 4.707487 0.220478 -0.074364   | 70  | 1 | 0 | -1.268799  | -1.526574 | -0.257236 |
| 6                     | 6      | 0      | -0.034945 5.253100 -1.942062  | 71  | 1 | 0 | -1.675855  | -0.021254 | 2.228985  |
| 7                     | 1      | 0      | -0.046997 7.892097 -0.729387  | 72  | 1 | 0 | -0.845190  | -1.558809 | 2.541515  |
| 8                     | 1      | 0      | -0.049482 8.211947 1.765259   | 73  | 1 | 0 | -1.050818  | -2.376716 | 4.764205  |
| 9                     | 1      | 0      | -0.041737 6.245544 3.274897   | 74  | 1 | 0 | -2.247961  | -2.374414 | 6.970407  |
| 10                    | 1      | 0      | -0.031456 3.925151 2.362194   | 75  | 1 | 0 | -4.422492  | -1.102024 | 7.157960  |
| 11                    | 1      | 0      | -2.628895 4.200607 -0.464340  | 76  | 1 | 0 | -5.278104  | 0.095277  | 5.138251  |
| 12                    | 1      | 0      | 2.568782 4.212155 -0.559170   | 77  | 1 | 0 | -2.830818  | -3.393404 | 2.501909  |
| 13                    | 8      | 0      | -0.027228 3.890135 -1.915599  | 78  | 1 | 0 | -1.736814  | -3.570624 | 1.111885  |
| 14                    | 8      | 0      | -0.037904 5.874576 -2.974735  | 79  | 1 | 0 | 2.958988   | -1.457026 | 0.865362  |
| 15                    | 6      | 0      | -0.037810 5.731013 -0.541295  | 80  | 1 | 0 | 1.248341   | -1.445075 | 0.409614  |
| 16                    | 6      | 0      | -0.043651 7.038531 -0.048109  | 81  | 1 | 0 | 2.832902   | -3.846891 | -1.857257 |
| 17                    | 6      | 0      | -0.044991 7.206771 1.338003   | 82  | 1 | 0 | 1.815253   | -3.728236 | -0.404930 |
| 18                    | 6      | 0      | -0.040602 6.090243 2.193368   | 83  | 1 | 0 | 2.810596   | -4.318568 | 1.699128  |
| 19                    | 6      | 0      | -0.034746 4.784379 1.687893   | 84  | 1 | 0 | 7.107730   | -4.801340 | 1.855013  |
| 20                    | 6      | 0      | -0.033440 4.623748 0.303264   | 85  | 1 | 0 | 7.194015   | -3.909978 | -0.478130 |
| 21                    | 6      | 0      | -0.027529 3.354198 -0.538191  | 86  | 1 | 0 | 1.672169   | -0.512752 | -2.336871 |
| 22                    | 6      | 0      | -1.276460 2.511688 -0.367844  | 87  | 1 | 0 | 0.875510   | -2.099295 | -2.326341 |
| 23                    | 6      | 0      | -2.540396 3.116609 -0.384887  | 88  | 7 | 0 | 3.746250   | -1.261492 | -3.844917 |
| 24                    | 6      | 0      | -3.694529 2.353902 -0.284973  | 89  | 6 | 0 | -3.607395  | -4.517142 | -0.472719 |
| 25                    | 6      | 0      | -3.620327 0.947458 -0.175173  | 90  | 1 | 0 | -2.586899  | -4.671247 | -0.830680 |
| 26                    | 6      | 0      | -2.366115 0.316927 -0.131665  | 91  | 7 | 0 | -5.079372  | -3.522970 | 1.142397  |
| 27                    | 6      | 0      | -1.208141 1.119658 -0.229156  | 92  | 1 | 0 | -4.534533  | -5.706775 | -2.029392 |
| 28                    | 6      | 0      | 1.170910 1.131579 -0.211489   | 93  | 1 | 0 | 4.855658   | -5.010539 | 2.980387  |
| 29                    | 6      | 0      | 2.334892 0.341155 -0.089353   | 94  | 6 | 0 | 5.565633   | 0.344189  | 1.063029  |
| 30                    | 6      | 0      | 3.584248 0.980962 -0.139191   | 95  | 1 | 0 | 5.491801   | 1.347240  | 1.503877  |
| 31                    | 6      | 0      | 3.648246 2.380356 -0.321620   | 96  | 1 | 0 | 5.239802   | -0.369172 | 1.836779  |
| 32                    | 6      | 0      | 2.487704 3.133671 -0.419160   | 97  | 6 | 0 | -5.637266  | 0.060769  | -1.136586 |
| 33                    | 6      | 0      | 1.227912 2.522860 -0.360251   | 98  | 1 | 0 | -5.606111  | 0.954232  | -1.773966 |
| 34                    | 6      | 0      | -2.280940 -1.186047 0.036296  | 99  | 1 | 0 | -5.322575  | -0.789277 | -1.763287 |
| 35                    | 6      | 0      | -1.846217 -1.083866 2.457130  | 100 | 6 | 0 | 6.992988   | 0.056943  | 0.647110  |
| 36                    | 6      | 0      | -2.547690 -1.139865 3.803006  | 101 | 6 | 0 | 8.101382   | 0.100729  | 1.523190  |
| 37                    | 6      | 0      | -1.993549 -1.838289 4.885615  | 102 | 6 | 0 | 7.264025   | -0.277516 | -0.688906 |
| 38                    | 6      | 0      | -2.660807 -1.835724 6.113751  | 103 | 6 | 0 | 9.405854   | -0.166641 | 1.089472  |
| 39                    | 6      | 0      | -3.862591 -1.135722 6.220930  | 104 | 6 | 0 | 8.561057   | -0.546540 | -1.130839 |
| 40                    | 6      | 0      | -4.338601 -0.468126 5.086493  | 105 | 1 | 0 | 6.427789   | -0.330963 | -1.384362 |
| 41                    | 6      | 0      | -2.694858 -3.114104 1.445795  | 106 | 6 | 0 | 9.639671   | -0.490690 | -0.242821 |
| 42                    | 6      | 0      | -3.840691 -3.734258 0.667914  | 107 | 1 | 0 | 10.217259  | -0.113559 | 1.813390  |
| 43                    | 1      | 0      | -7.107948 -3.880294 0.917220  | 108 | 1 | 0 | 8.727929   | -0.802696 | -2.179703 |
| 44                    | 1      | 0      | -6.858023 -5.297836 -1.126148 | 109 | 1 | 0 | 10.655495  | -0.699440 | -0.583890 |
| 45                    | 1      | 0      | 1.157504 -3.384704 -4.307926  | 110 | 7 | 0 | 7.943009   | 0.431836  | 2.947677  |
| 46                    | 1      | 0      | 2.418106 -3.846632 -6.429699  | 111 | 8 | 0 | 8.941781   | 0.474224  | 3.650664  |
| 47                    | 1      | 0      | 4.571652 -2.592973 -6.845953  | 112 | 8 | 0 | 6.813009   | 0.650236  | 3.370900  |
| 48                    | 1      | 0      | 5.342071 -0.948580 -5.129165  | 113 | 6 | 0 | -7.038385  | -0.165866 | -0.608793 |
| 49                    | 7      | 0      | -2.644395 -1.655302 1.377027  | 114 | 6 | 0 | -8.191561  | -0.244146 | -1.421789 |
| 50                    | 7      | 0      | 2.652530 -1.903757 -1.137801  | 115 | 6 | 0 | -7.235472  | -0.309078 | 0.773658  |
| 51                    | 7      | 0      | -3.704953 -0.465564 3.911436  | 116 | 6 | 0 | -9.469585  | -0.447597 | -0.886683 |
| 52                    | 7      | 0      | 5.146687 -3.638527 -0.647524  | 117 | 6 | 0 | -8.505046  | -0.517327 | 1.316599  |
| 53                    | 6      | 0      | -6.112370 -4.074177 0.500531  | 118 | 1 | 0 | -6.363713  | -0.260908 | 1.424478  |
| 54                    | 6      | 0      | -5.977253 -4.868676 -0.643712 | 119 | 6 | 0 | -9.629367  | -0.586902 | 0.488069  |
| 55                    | 6      | 0      | -4.692290 -5.093344 -1.138727 | 120 | 1 | 0 | -10.318937 | -0.493598 | -1.566274 |
| 56                    | 6      | 0      | 2.262779 -1.163529 0.065573   | 121 | 1 | 0 | -8.614428  | -0.626289 | 2.398140  |
| 57                    | 6      | 0      | 2.740589 -3.340430 -0.884724  | 122 | 1 | 0 | -10.623630 | -0.749549 | 0.908546  |
| 58                    | 6      | 0      | 3.945239 -3.746962 -0.056373  | 123 | 7 | 0 | -8.109578  | -0.113239 | -2.884242 |
| 59                    | 6      | 0      | 3.803036 -4.238948 1.249553   | 124 | 8 | 0 | -9.149814  | -0.060792 | -3.523472 |
| 60                    | 6      | 0      | 4.942059 -4.625559 1.961177   | 125 | 8 | 0 | -6.998611  | -0.066157 | -3.401175 |

**Optimized Coordinates of 1-b at the CPCM(H<sub>2</sub>O)-B3LYP/SVP level.**

$E = -4346.550117$

Sum of electronic and thermal free energies =  $-4345.706139$

| Standard orientation: |        |        |                              | 62  | 6 | 0 | 5.573487  | -4.241038 | -1.123105 |
|-----------------------|--------|--------|------------------------------|-----|---|---|-----------|-----------|-----------|
| -----                 |        |        |                              | 63  | 6 | 0 | 1.415724  | -0.942648 | -2.523797 |
| Center                | Atomic | Atomic | Coordinates (Angstroms)      | 64  | 6 | 0 | 1.849223  | -1.364163 | -3.916661 |
| Number                | Number | Type   | X Y Z                        | 65  | 6 | 0 | 1.032985  | -2.173187 | -4.720956 |
| -----                 |        |        |                              | 66  | 6 | 0 | 1.467913  | -2.521474 | -6.002684 |
| 1                     | 17     | 0      | -5.200795 3.649725 -0.026668 | 67  | 6 | 0 | 2.706048  | -2.050362 | -6.439805 |
| 2                     | 17     | 0      | 5.207087 3.549574 -0.875404  | 68  | 6 | 0 | 3.448544  | -1.244633 | -5.568497 |
| 3                     | 8      | 0      | -4.727610 0.656205 0.064308  | 69  | 1 | 0 | -3.063681 | -1.219182 | -0.279140 |
| 4                     | 8      | 0      | -0.002907 0.899825 -0.204169 | 70  | 1 | 0 | -1.296742 | -1.081516 | -0.240951 |
| 5                     | 8      | 0      | 4.725695 0.611078 -0.295964  | 71  | 1 | 0 | -1.451385 | 0.735524  | 2.247658  |
| 6                     | 6      | 0      | -0.067556 5.702079 -1.977798 | 72  | 1 | 0 | -0.350305 | -0.643002 | 2.459047  |
| 7                     | 1      | 0      | 0.021277 8.330793 -0.745203  | 73  | 1 | 0 | -0.058609 | -1.386098 | 4.701979  |
| 8                     | 1      | 0      | 0.164369 8.628611 1.747994   | 74  | 1 | 0 | -0.846858 | -1.427034 | 7.085499  |
| 9                     | 1      | 0      | 0.231121 6.649211 3.238986   | 75  | 1 | 0 | -3.104323 | -0.428490 | 7.623109  |
| 10                    | 1      | 0      | 0.158962 4.336800 2.308481   | 76  | 1 | 0 | -4.441067 | 0.563318  | 5.759053  |
| 11                    | 1      | 0      | -2.595355 4.658845 -0.387939 | 77  | 1 | 0 | -1.957573 | -2.703351 | 2.899049  |
| 12                    | 1      | 0      | 2.597994 4.609455 -0.803593  | 78  | 1 | 0 | -1.273630 | -2.911057 | 1.274163  |
| 13                    | 8      | 0      | -0.073491 4.338632 -1.962493 | 79  | 1 | 0 | 3.058487  | -1.134092 | 0.432557  |
| 14                    | 8      | 0      | -0.121089 6.331980 -3.003881 | 80  | 1 | 0 | 1.291774  | -1.010410 | 0.352199  |
| 15                    | 6      | 0      | 0.013099 6.168104 -0.575412  | 81  | 1 | 0 | 1.967087  | -3.337930 | -2.296167 |
| 16                    | 6      | 0      | 0.052065 7.471258 -0.072176  | 82  | 1 | 0 | 1.285923  | -3.146515 | -0.668959 |
| 17                    | 6      | 0      | 0.131436 7.627240 1.313097   | 83  | 1 | 0 | 2.451458  | -4.277120 | 1.070665  |
| 18                    | 6      | 0      | 0.169271 6.503322 2.157912   | 84  | 1 | 0 | 6.544483  | -5.489190 | 0.359841  |
| 19                    | 6      | 0      | 0.129129 5.201969 1.642486   | 85  | 1 | 0 | 6.450706  | -4.202566 | -1.779865 |
| 20                    | 6      | 0      | 0.050518 5.053629 0.258755   | 86  | 1 | 0 | 1.456407  | 0.155142  | -2.499643 |
| 21                    | 6      | 0      | -0.004524 3.791240 -0.592089 | 87  | 1 | 0 | 0.356178  | -1.234181 | -2.365450 |
| 22                    | 6      | 0      | -1.251050 2.960807 -0.358829 | 88  | 7 | 0 | 3.037414  | -0.906478 | -4.344487 |
| 23                    | 6      | 0      | -2.510191 3.574115 -0.314618 | 89  | 6 | 0 | -3.355207 | -4.267302 | 0.426373  |
| 24                    | 6      | 0      | -3.664130 2.820167 -0.165309 | 90  | 1 | 0 | -2.453093 | -4.389812 | -0.177295 |
| 25                    | 6      | 0      | -3.602555 1.408931 -0.064023 | 91  | 7 | 0 | -4.468363 | -3.149772 | 2.236678  |
| 26                    | 6      | 0      | -2.346605 0.776688 -0.034711 | 92  | 1 | 0 | -4.494138 | -5.781365 | -0.626810 |
| 27                    | 6      | 0      | -1.190036 1.571688 -0.206767 | 93  | 1 | 0 | 4.491395  | -5.527369 | 1.831497  |
| 28                    | 6      | 0      | 1.186141 1.556608 -0.328155  | 94  | 6 | 0 | 5.645244  | 0.857880  | 0.793775  |
| 29                    | 6      | 0      | 2.343984 0.746574 -0.279335  | 95  | 1 | 0 | 6.650025  | 0.737617  | 0.380436  |
| 30                    | 6      | 0      | 3.601008 1.371379 -0.369207  | 96  | 1 | 0 | 5.536428  | 1.890810  | 1.146332  |
| 31                    | 6      | 0      | 3.665258 2.769154 -0.588077  | 97  | 6 | 0 | -5.666849 | 0.648700  | -1.036129 |
| 32                    | 6      | 0      | 2.510886 3.535435 -0.635640  | 98  | 1 | 0 | -6.663264 | 0.619023  | -0.587818 |
| 33                    | 6      | 0      | 1.248971 2.944789 -0.488479  | 99  | 1 | 0 | -5.573120 | 1.577668  | -1.611920 |
| 34                    | 6      | 0      | -2.230186 -0.709700 0.224817 | 100 | 6 | 0 | 5.395806  | -0.072868 | 1.962638  |
| 35                    | 6      | 0      | -1.410674 -0.323227 2.539099 | 101 | 6 | 0 | 5.991838  | -1.338293 | 2.144786  |
| 36                    | 6      | 0      | -1.847970 -0.391420 3.991619 | 102 | 6 | 0 | 4.515047  | 0.353606  | 2.969890  |
| 37                    | 6      | 0      | -1.028037 -0.963190 4.975654 | 103 | 6 | 0 | 5.728320  | -2.133276 | 3.265167  |
| 38                    | 6      | 0      | -1.467956 -0.985158 6.302241 | 104 | 6 | 0 | 4.220358  | -0.438671 | 4.081954  |
| 39                    | 6      | 0      | -2.714400 -0.435620 6.602997 | 105 | 1 | 0 | 4.056565  | 1.341122  | 2.879753  |
| 40                    | 6      | 0      | -3.460260 0.116457 5.554848  | 106 | 6 | 0 | 4.827124  | -1.689047 | 4.230189  |
| 41                    | 6      | 0      | -2.151432 -2.517973 1.831784 | 107 | 1 | 0 | 6.230894  | -3.094689 | 3.360258  |
| 42                    | 6      | 0      | -3.380239 -3.330881 1.470167 | 108 | 1 | 0 | 3.522055  | -0.072965 | 4.837970  |
| 43                    | 1      | 0      | -6.425001 -3.707448 2.629838 | 109 | 1 | 0 | 4.607559  | -2.314777 | 5.097523  |
| 44                    | 1      | 0      | -6.532854 -5.429122 0.822739 | 110 | 7 | 0 | 6.954461  | -1.888772 | 1.172963  |
| 45                    | 1      | 0      | 0.070049 -2.524950 -4.343432 | 111 | 8 | 0 | 7.755099  | -2.720188 | 1.575693  |
| 46                    | 1      | 0      | 0.849579 -3.152443 -6.646161 | 112 | 8 | 0 | 6.900400  | -1.503963 | 0.013041  |
| 47                    | 1      | 0      | 3.091981 -2.294393 -7.431898 | 113 | 6 | 0 | -5.430089 | -0.517506 | -1.973760 |
| 48                    | 1      | 0      | 4.422418 -0.851316 -5.885093 | 114 | 6 | 0 | -6.024715 | -1.791935 | -1.863196 |
| 49                    | 7      | 0      | -2.296075 -1.074397 1.650151 | 115 | 6 | 0 | -4.567310 | -0.322992 | -3.064655 |
| 50                    | 7      | 0      | 2.303490 -1.453824 -1.479620 | 116 | 6 | 0 | -5.780076 | -2.812873 | -2.787575 |
| 51                    | 7      | 0      | -3.044460 0.143095 4.286929  | 117 | 6 | 0 | -4.289604 | -1.340309 | -3.980750 |
| 52                    | 7      | 0      | 4.488107 -3.583994 -1.536686 | 118 | 1 | 0 | -4.110079 | 0.659783  | -3.201371 |
| 53                    | 6      | 0      | -5.553972 -3.884990 1.987931 | 119 | 6 | 0 | -4.896613 | -2.591565 | -3.841779 |
| 54                    | 6      | 0      | -5.619925 -4.850445 0.976257 | 120 | 1 | 0 | -6.281713 | -3.771231 | -2.661767 |
| 55                    | 6      | 0      | -4.491854 -5.041675 0.177740 | 121 | 1 | 0 | -3.605474 | -1.150203 | -4.810619 |
| 56                    | 6      | 0      | 2.228680 -0.759185 -0.182989 | 122 | 1 | 0 | -4.690752 | -3.392005 | -4.555162 |
| 57                    | 6      | 0      | 2.162297 -2.898669 -1.306216 | 123 | 7 | 0 | -6.963830 | -2.116600 | -0.773687 |
| 58                    | 6      | 0      | 3.392203 -3.599717 -0.760406 | 124 | 8 | 0 | -7.768737 | -3.016220 | -0.966446 |
| 59                    | 6      | 0      | 3.359056 -4.285304 0.462759  | 125 | 8 | 0 | -6.885506 | -1.487503 | 0.272535  |
| 60                    | 6      | 0      | 4.495395 -4.981059 0.884917  |     |   |   |           |           |           |
| 61                    | 6      | 0      | 5.631431 -4.962722 0.075099  |     |   |   |           |           |           |

**Optimized Coordinates of 1-a at the B3LYP/SVP level.**

$E = -4346.521105$

Sum of electronic and thermal free energies =  $-4345.682251$

| Standard orientation: |        |        |                               | 63    | 6 | 0 | 2.239271  | -1.150150 | -2.461324 |  |  |
|-----------------------|--------|--------|-------------------------------|-------|---|---|-----------|-----------|-----------|--|--|
| -----                 |        |        |                               | 64    | 6 | 0 | 3.079483  | -1.635915 | -3.630972 |  |  |
| Center                | Atomic | Atomic | Coordinates (Angstroms)       | 65    | 6 | 0 | 2.495092  | -2.330152 | -4.701197 |  |  |
| Number                | Number | Type   | X Y Z                         | 66    | 6 | 0 | 3.292954  | -2.718742 | -5.779946 |  |  |
| -----                 |        |        |                               | 67    | 6 | 0 | 4.651403  | -2.404884 | -5.753652 |  |  |
| 1                     | 17     | 0      | -5.208320 3.528335 -0.083745  | 68    | 6 | 0 | 5.143504  | -1.711800 | -4.641440 |  |  |
| 2                     | 17     | 0      | 5.228143 3.470364 -0.370554   | 69    | 1 | 0 | -2.955906 | -1.252139 | -0.910390 |  |  |
| 3                     | 8      | 0      | -4.715085 0.532082 0.006342   | 70    | 1 | 0 | -1.254224 | -1.159730 | -0.431812 |  |  |
| 4                     | 8      | 0      | -0.005127 0.773513 -0.221531  | 71    | 1 | 0 | -2.126061 | 0.199029  | 2.217598  |  |  |
| 5                     | 8      | 0      | 4.709184 0.489088 -0.132410   | 72    | 1 | 0 | -1.020034 | -1.172121 | 2.463357  |  |  |
| 6                     | 6      | 0      | 0.015453 5.644337 -1.763649   | 73    | 1 | 0 | -1.175334 | -2.187747 | 4.585307  |  |  |
| 7                     | 1      | 0      | 0.026985 8.217975 -0.431031   | 74    | 1 | 0 | -2.482317 | -2.660025 | 6.676704  |  |  |
| 8                     | 1      | 0      | 0.029440 8.429021 2.081964    | 75    | 1 | 0 | -4.900372 | -1.936016 | 6.771781  |  |  |
| 9                     | 1      | 0      | 0.020809 6.396050 3.500569    | 76    | 1 | 0 | -5.874374 | -0.780564 | 4.775327  |  |  |
| 10                    | 1      | 0      | 0.009297 4.119956 2.480354    | 77    | 1 | 0 | -2.809535 | -3.323806 | 2.082045  |  |  |
| 11                    | 1      | 0      | -2.587050 4.545235 -0.321633  | 78    | 1 | 0 | -1.448079 | -3.218478 | 0.933608  |  |  |
| 12                    | 1      | 0      | 2.608483 4.520022 -0.408452   | 79    | 1 | 0 | 2.880263  | -1.182076 | 0.846649  |  |  |
| 13                    | 8      | 0      | 0.010964 4.275677 -1.791382   | 80    | 1 | 0 | 1.210587  | -1.133855 | 0.259129  |  |  |
| 14                    | 8      | 0      | 0.018698 6.317465 -2.755573   | 81    | 1 | 0 | 2.891612  | -3.551689 | -1.919666 |  |  |
| 15                    | 6      | 0      | 0.016621 6.055673 -0.335653   | 82    | 1 | 0 | 1.443643  | -3.312380 | -0.907347 |  |  |
| 16                    | 6      | 0      | 0.022978 7.338418 0.216705    | 83    | 1 | 0 | 1.499260  | -4.147932 | 1.309414  |  |  |
| 17                    | 6      | 0      | 0.024257 7.444077 1.609064    | 84    | 1 | 0 | 5.326340  | -5.247521 | 3.001754  |  |  |
| 18                    | 6      | 0      | 0.019282 6.290366 2.412721    | 85    | 1 | 0 | 6.395461  | -4.258115 | 0.963628  |  |  |
| 19                    | 6      | 0      | 0.012850 5.010161 1.846860    | 86    | 1 | 0 | 2.291988  | -0.050996 | -2.463358 |  |  |
| 20                    | 6      | 0      | 0.011542 4.912131 0.456132    | 87    | 1 | 0 | 1.174031  | -1.418867 | -2.648255 |  |  |
| 21                    | 6      | 0      | 0.006505 3.684379 -0.448038   | 88    | 7 | 0 | 4.385858  | -1.336517 | -3.611995 |  |  |
| 22                    | 6      | 0      | -1.248963 2.844266 -0.305326  | 89    | 6 | 0 | -2.802008 | -4.223855 | -1.078086 |  |  |
| 23                    | 6      | 0      | -2.508164 3.458102 -0.286649  | 90    | 1 | 0 | -1.724050 | -4.160433 | -1.245776 |  |  |
| 24                    | 6      | 0      | -3.671084 2.705865 -0.204505  | 91    | 7 | 0 | -4.688212 | -3.695382 | 0.305833  |  |  |
| 25                    | 6      | 0      | -3.610910 1.294724 -0.156505  | 92    | 1 | 0 | -3.208065 | -5.348693 | -2.885783 |  |  |
| 26                    | 6      | 0      | -2.359657 0.652487 -0.171388  | 93    | 1 | 0 | 2.807715  | -5.192235 | 3.180926  |  |  |
| 27                    | 6      | 0      | -1.193651 1.447031 -0.237388  | 94    | 6 | 0 | 5.576164  | 0.487821  | 0.999260  |  |  |
| 28                    | 6      | 0      | 1.188128 1.438622 -0.220220   | 95    | 1 | 0 | 5.892280  | 1.508154  | 1.256173  |  |  |
| 29                    | 6      | 0      | 2.347252 0.636676 -0.125112   | 96    | 1 | 0 | 5.045601  | 0.088156  | 1.880332  |  |  |
| 30                    | 6      | 0      | 3.603677 1.267907 -0.138711   | 97    | 6 | 0 | -5.673253 | 0.404125  | -1.042180 |  |  |
| 31                    | 6      | 0      | 3.677121 2.674925 -0.248799   | 98    | 1 | 0 | -6.018826 | 1.388583  | -1.386348 |  |  |
| 32                    | 6      | 0      | 2.519786 3.436849 -0.317731   | 99    | 1 | 0 | -5.214866 | -0.093556 | -1.913357 |  |  |
| 33                    | 6      | 0      | 1.254864 2.834584 -0.298975   | 100   | 6 | 0 | 6.774020  | -0.376576 | 0.666989  |  |  |
| 34                    | 6      | 0      | -2.279477 -0.859918 -0.134855 | 101   | 6 | 0 | 7.922467  | -0.480152 | 1.481924  |  |  |
| 35                    | 6      | 0      | -2.091106 -0.895294 2.326939  | 102   | 6 | 0 | 6.768824  | -1.125150 | -0.521769 |  |  |
| 36                    | 6      | 0      | -2.853353 -1.238163 3.595944  | 103   | 6 | 0 | 9.019235  | -1.274184 | 1.128210  |  |  |
| 37                    | 6      | 0      | -2.223759 -1.890385 4.666824  | 104   | 6 | 0 | 7.854710  | -1.928799 | -0.874383 |  |  |
| 38                    | 6      | 0      | -2.951822 -2.152234 5.829998  | 105   | 1 | 0 | 5.891454  | -1.080309 | -1.168204 |  |  |
| 39                    | 6      | 0      | -4.287554 -1.755822 5.885642  | 106   | 6 | 0 | 8.985725  | -2.004661 | -0.055585 |  |  |
| 40                    | 6      | 0      | -4.828683 -1.111976 4.766451  | 107   | 1 | 0 | 9.877882  | -1.298615 | 1.797796  |  |  |
| 41                    | 6      | 0      | -2.514849 -2.930673 1.097251  | 108   | 1 | 0 | 7.806984  | -2.506121 | -1.800834 |  |  |
| 42                    | 6      | 0      | -3.371776 -3.636565 0.062435  | 109   | 1 | 0 | 9.836621  | -2.630398 | -0.334580 |  |  |
| 43                    | 1      | 0      | -6.545009 -4.341897 -0.334188 | 110   | 7 | 0 | 8.025433  | 0.240991  | 2.764577  |  |  |
| 44                    | 1      | 0      | -5.687546 -5.441209 -2.415005 | 111   | 8 | 0 | 9.107500  | 0.264257  | 3.327473  |  |  |
| 45                    | 1      | 0      | 1.426775 -2.559675 -4.685646  | 112   | 8 | 0 | 7.012830  | 0.772974  | 3.205140  |  |  |
| 46                    | 1      | 0      | 2.859007 -3.259733 -6.625040  | 113   | 6 | 0 | -6.832345 | -0.413791 | -0.512074 |  |  |
| 47                    | 1      | 0      | 5.318393 -2.684775 -6.572209  | 114   | 6 | 0 | -8.032065 | -0.637919 | -1.222580 |  |  |
| 48                    | 1      | 0      | 6.205576 -1.442394 -4.588007  | 115   | 6 | 0 | -6.735368 | -0.990678 | 0.765287  |  |  |
| 49                    | 7      | 0      | -2.671391 -1.483466 1.131477  | 116   | 6 | 0 | -9.088043 | -1.384420 | -0.687732 |  |  |
| 50                    | 7      | 0      | 2.717118 -1.623224 -1.172968  | 117   | 6 | 0 | -7.781406 | -1.744341 | 1.300994  |  |  |
| 51                    | 7      | 0      | -4.137464 -0.858237 3.656268  | 118   | 1 | 0 | -5.816561 | -0.852974 | 1.336250  |  |  |
| 52                    | 7      | 0      | 4.612091 -3.704447 0.076315   | 119   | 6 | 0 | -8.963230 | -1.942438 | 0.580840  |  |  |
| 53                    | 6      | 0      | -5.473944 -4.323072 -0.569005 | 120   | 1 | 0 | -9.988508 | -1.508710 | -1.287622 |  |  |
| 54                    | 6      | 0      | -4.998609 -4.936955 -1.733595 | 121   | 1 | 0 | -7.661242 | -2.186669 | 2.292849  |  |  |
| 55                    | 6      | 0      | -3.628476 -4.884369 -1.989787 | 122   | 1 | 0 | -9.782893 | -2.529328 | 1.001671  |  |  |
| 56                    | 6      | 0      | 2.254852 -0.870407 -0.004953  | 123   | 7 | 0 | -8.237160 | -0.098715 | -2.580947 |  |  |
| 57                    | 6      | 0      | 2.526251 -3.056033 -1.006946  | 124   | 8 | 0 | -9.347345 | -0.194970 | -3.077439 |  |  |
| 58                    | 6      | 0      | 3.275531 -3.665994 0.163806   | 125   | 8 | 0 | -7.276686 | 0.411875  | -3.145094 |  |  |
| 59                    | 6      | 0      | 2.590314 -4.193978 1.269356   | ----- |   |   |           |           |           |  |  |
| 60                    | 6      | 0      | 3.319270 -4.773883 2.309977   |       |   |   |           |           |           |  |  |
| 61                    | 6      | 0      | 4.710524 -4.805712 2.215078   |       |   |   |           |           |           |  |  |
| 62                    | 6      | 0      | 5.304313 -4.253650 1.074078   |       |   |   |           |           |           |  |  |



**Optimized Coordinates of l-b at the B3LYP/SVP level.**

$E = -4346.497978$

Sum of electronic and thermal free energies =  $-4345.654287$

| Standard orientation: |        |        |                               | 62  | 6 | 0 | -5.629367 | -4.145643 | 1.607403  |
|-----------------------|--------|--------|-------------------------------|-----|---|---|-----------|-----------|-----------|
| -----                 |        |        |                               | 63  | 6 | 0 | -1.390294 | -0.780540 | 2.698788  |
| Center                | Atomic | Atomic | Coordinates (Angstroms)       | 64  | 6 | 0 | -1.902774 | -0.959707 | 4.116280  |
| Number                | Number | Type   | X Y Z                         | 65  | 6 | 0 | -1.298495 | -1.850911 | 5.015378  |
| -----                 |        |        |                               | 66  | 6 | 0 | -1.821783 | -1.976239 | 6.305032  |
| 1                     | 17     | 0      | 5.225217 3.460224 -0.678511   | 67  | 6 | 0 | -2.928133 | -1.203333 | 6.654576  |
| 2                     | 17     | 0      | -5.106765 3.591228 0.632648   | 68  | 6 | 0 | -3.452146 | -0.330903 | 5.692269  |
| 3                     | 8      | 0      | 4.740837 0.460786 -0.379712   | 69  | 1 | 0 | 3.134829  | -1.334012 | 0.198553  |
| 4                     | 8      | 0      | 0.054251 0.796855 0.204100    | 70  | 1 | 0 | 1.370124  | -1.196224 | 0.373384  |
| 5                     | 8      | 0      | -4.674856 0.588982 0.283409   | 71  | 1 | 0 | 1.157289  | 0.356316  | -2.241028 |
| 6                     | 6      | 0      | 0.278957 5.588828 1.779889    | 72  | 1 | 0 | 0.133696  | -1.099134 | -2.340109 |
| 7                     | 1      | 0      | 0.182128 8.229013 0.592119    | 73  | 1 | 0 | 0.056821  | -2.288600 | -4.481534 |
| 8                     | 1      | 0      | -0.066977 8.576766 -1.893495  | 74  | 1 | 0 | 0.793147  | -2.386157 | -6.881667 |
| 9                     | 1      | 0      | -0.235377 6.623702 -3.411059  | 75  | 1 | 0 | 2.704578  | -0.907611 | -7.612700 |
| 10                    | 1      | 0      | -0.166101 4.295201 -2.517544  | 76  | 1 | 0 | 3.757609  | 0.602588  | -5.915459 |
| 11                    | 1      | 0      | 2.673140 4.520288 -0.181274   | 77  | 1 | 0 | 1.782022  | -3.106488 | -2.698819 |
| 12                    | 1      | 0      | -2.484511 4.584254 0.487793   | 78  | 1 | 0 | 1.176168  | -3.179388 | -1.023328 |
| 13                    | 8      | 0      | 0.253480 4.222547 1.738235    | 79  | 1 | 0 | -3.061715 | -1.234015 | -0.209144 |
| 14                    | 8      | 0      | 0.398487 6.210501 2.798454    | 80  | 1 | 0 | -1.285605 | -1.143044 | -0.171372 |
| 15                    | 6      | 0      | 0.138562 6.075518 0.382546    | 81  | 1 | 0 | -2.083789 | -3.160379 | 2.739612  |
| 16                    | 6      | 0      | 0.103065 7.386193 -0.098250   | 82  | 1 | 0 | -1.325736 | -3.187305 | 1.126595  |
| 17                    | 6      | 0      | -0.034965 7.567589 -1.475927  | 83  | 1 | 0 | -2.573103 | -4.207999 | -0.673598 |
| 18                    | 6      | 0      | -0.131279 6.459138 -2.335549  | 84  | 1 | 0 | -6.668542 | -5.347729 | 0.130086  |
| 19                    | 6      | 0      | -0.094090 5.150132 -1.841049  | 85  | 1 | 0 | -6.485026 | -4.098373 | 2.291597  |
| 20                    | 6      | 0      | 0.041142 4.976258 -0.464152   | 86  | 1 | 0 | -1.347964 | 0.301659  | 2.524776  |
| 21                    | 6      | 0      | 0.108888 3.702085 0.368434    | 87  | 1 | 0 | -0.350313 | -1.170849 | 2.623465  |
| 22                    | 6      | 0      | 1.323023 2.846702 0.066390    | 88  | 7 | 0 | -2.956289 | -0.207693 | 4.463115  |
| 23                    | 6      | 0      | 2.576330 3.434757 -0.145455   | 89  | 6 | 0 | 3.386625  | -4.296583 | -0.094081 |
| 24                    | 6      | 0      | 3.711571 2.656621 -0.318190   | 90  | 1 | 0 | 2.563823  | -4.284200 | 0.625471  |
| 25                    | 6      | 0      | 3.638146 1.243295 -0.263563   | 91  | 7 | 0 | 4.256676  | -3.586890 | -2.214766 |
| 26                    | 6      | 0      | 2.378164 0.628562 -0.135335   | 92  | 1 | 0 | 4.662236  | -5.589656 | 1.092446  |
| 27                    | 6      | 0      | 1.243758 1.449622 0.049986    | 93  | 1 | 0 | -4.657144 | -5.421760 | -1.387858 |
| 28                    | 6      | 0      | -1.125959 1.480917 0.271453   | 94  | 6 | 0 | -5.575483 | 0.754631  | -0.825520 |
| 29                    | 6      | 0      | -2.296521 0.690485 0.294520   | 95  | 1 | 0 | -6.547977 | 0.417510  | -0.461679 |
| 30                    | 6      | 0      | -3.544965 1.340381 0.315436   | 96  | 1 | 0 | -5.649346 | 1.815722  | -1.098958 |
| 31                    | 6      | 0      | -3.585081 2.753008 0.413710   | 97  | 6 | 0 | 5.754229  | 0.558162  | 0.638456  |
| 32                    | 6      | 0      | -2.415882 3.499221 0.403238   | 98  | 1 | 0 | 6.662006  | 0.165223  | 0.177186  |
| 33                    | 6      | 0      | -1.163465 2.879326 0.308539   | 99  | 1 | 0 | 5.920003  | 1.609951  | 0.907305  |
| 34                    | 6      | 0      | 2.238134 -0.874454 -0.239527  | 100 | 6 | 0 | -5.123150 | -0.020932 | -2.050779 |
| 35                    | 6      | 0      | 1.167445 -0.712612 -2.484991  | 101 | 6 | 0 | -5.504537 | -1.334867 | -2.393532 |
| 36                    | 6      | 0      | 1.547192 -0.805709 -3.951955  | 102 | 6 | 0 | -4.238701 | 0.621170  | -2.935394 |
| 37                    | 6      | 0      | 0.881749 -1.666292 -4.837918  | 103 | 6 | 0 | -5.034603 | -1.967739 | -3.548995 |
| 38                    | 6      | 0      | 1.289977 -1.717503 -6.173414  | 104 | 6 | 0 | -3.738831 | -0.006290 | -4.077588 |
| 39                    | 6      | 0      | 2.345162 -0.902431 -6.581075  | 105 | 1 | 0 | -3.940729 | 1.649030  | -2.715080 |
| 40                    | 6      | 0      | 2.934405 -0.062956 -5.627421  | 106 | 6 | 0 | -4.137025 | -1.309529 | -4.386100 |
| 41                    | 6      | 0      | 2.018318 -2.824040 -1.663040  | 107 | 1 | 0 | -5.389058 | -2.973559 | -3.769468 |
| 42                    | 6      | 0      | 3.278501 -3.585714 -1.298952  | 108 | 1 | 0 | -3.044692 | 0.526940  | -4.731445 |
| 43                    | 1      | 0      | 6.152576 -4.235342 -2.724937  | 109 | 1 | 0 | -3.760502 | -1.809179 | -5.281418 |
| 44                    | 1      | 0      | 6.508755 -5.545457 -0.621893  | 110 | 7 | 0 | -6.455292 | -2.123462 | -1.571046 |
| 45                    | 1      | 0      | -0.430385 -2.438264 4.704950  | 111 | 8 | 0 | -7.002072 | -3.074414 | -2.109117 |
| 46                    | 1      | 0      | -1.372353 -2.667885 7.022792  | 112 | 8 | 0 | -6.630197 | -1.795309 | -0.409894 |
| 47                    | 1      | 0      | -3.375909 -1.264998 7.649154  | 113 | 6 | 0 | 5.377556  | -0.200413 | 1.899328  |
| 48                    | 1      | 0      | -4.313786 0.302678 5.936456   | 114 | 6 | 0 | 5.696242  | -1.543256 | 2.193636  |
| 49                    | 7      | 0      | 2.138001 -1.371951 -1.617398  | 115 | 6 | 0 | 4.636860  | 0.491470  | 2.873806  |
| 50                    | 7      | 0      | -2.282610 -1.372075 1.706387  | 116 | 6 | 0 | 5.298023  | -2.156598 | 3.386220  |
| 51                    | 7      | 0      | 2.548063 -0.010059 -4.354451  | 117 | 6 | 0 | 4.211261  | -0.113664 | 4.057450  |
| 52                    | 7      | 0      | -4.524182 -3.513415 1.996052  | 118 | 1 | 0 | 4.391458  | 1.540681  | 2.693319  |
| 53                    | 6      | 0      | 5.370437 -4.269443 -1.957022  | 119 | 6 | 0 | 4.540602  | -1.446652 | 4.314598  |
| 54                    | 6      | 0      | 5.571908 -5.009913 -0.785988  | 120 | 1 | 0 | 5.597756  | -3.188349 | 3.563675  |
| 55                    | 6      | 0      | 4.551368 -5.025057 0.163070   | 121 | 1 | 0 | 3.629140  | 0.461376  | 4.781373  |
| 56                    | 6      | 0      | -2.211081 -0.819204 0.349427  | 122 | 1 | 0 | 4.220333  | -1.930352 | 5.240063  |
| 57                    | 6      | 0      | -2.212942 -0.827794 1.699789  | 123 | 7 | 0 | 6.506636  | -2.384589 | 1.278886  |
| 58                    | 6      | 0      | -3.456560 -3.529039 1.186528  | 124 | 8 | 0 | 7.016106  | -3.390768 | 1.749281  |
| 59                    | 6      | 0      | -3.465837 -4.205570 -0.042765 | 125 | 8 | 0 | 6.614775  | -2.041213 | 0.113647  |
| 60                    | 6      | 0      | -4.623416 -4.882652 -0.437324 |     |   |   |           |           |           |
| 61                    | 6      | 0      | -5.735266 -4.851569 0.402624  |     |   |   |           |           |           |

*Analytical HPLC Chromatograms of Purified Sensors.*

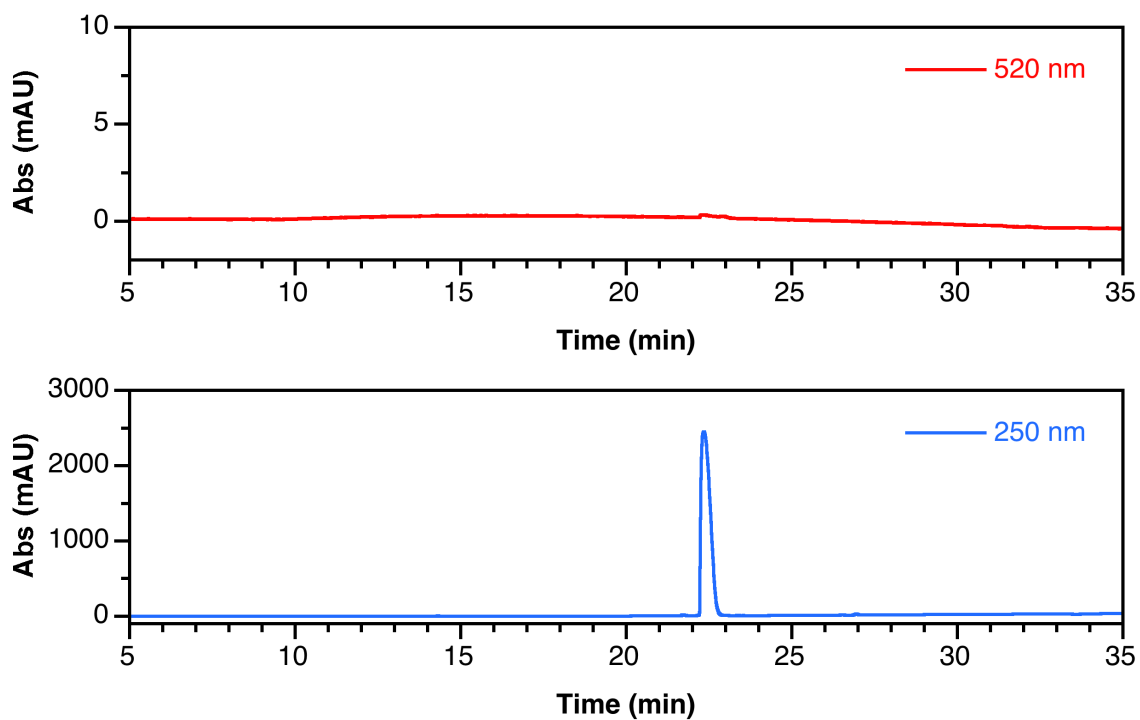

**Figure S41.** Analytical HPLC traces of purified **1**. Absorbance monitored at 520 nm (top) and 250 nm (bottom) using solvent gradient 8 (Table S1).

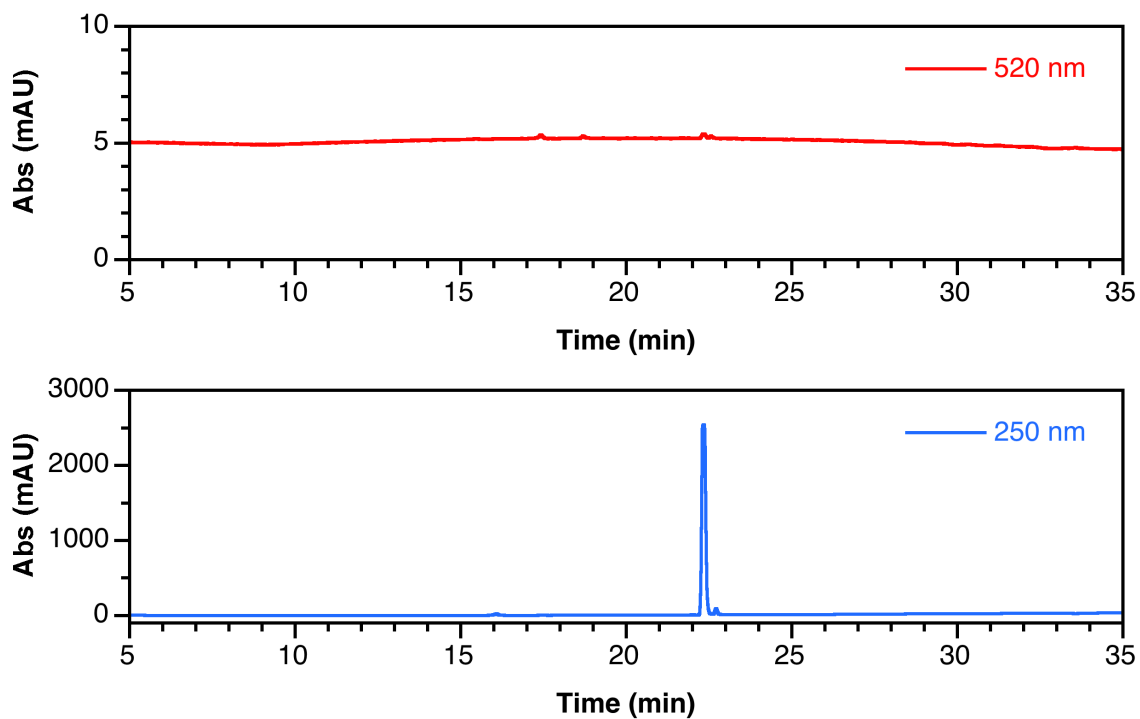

**Figure S42.** Analytical HPLC traces of purified **2**. Absorbance monitored at 520 nm (top) and 250 nm (bottom) using solvent gradient 8 (Table S1).

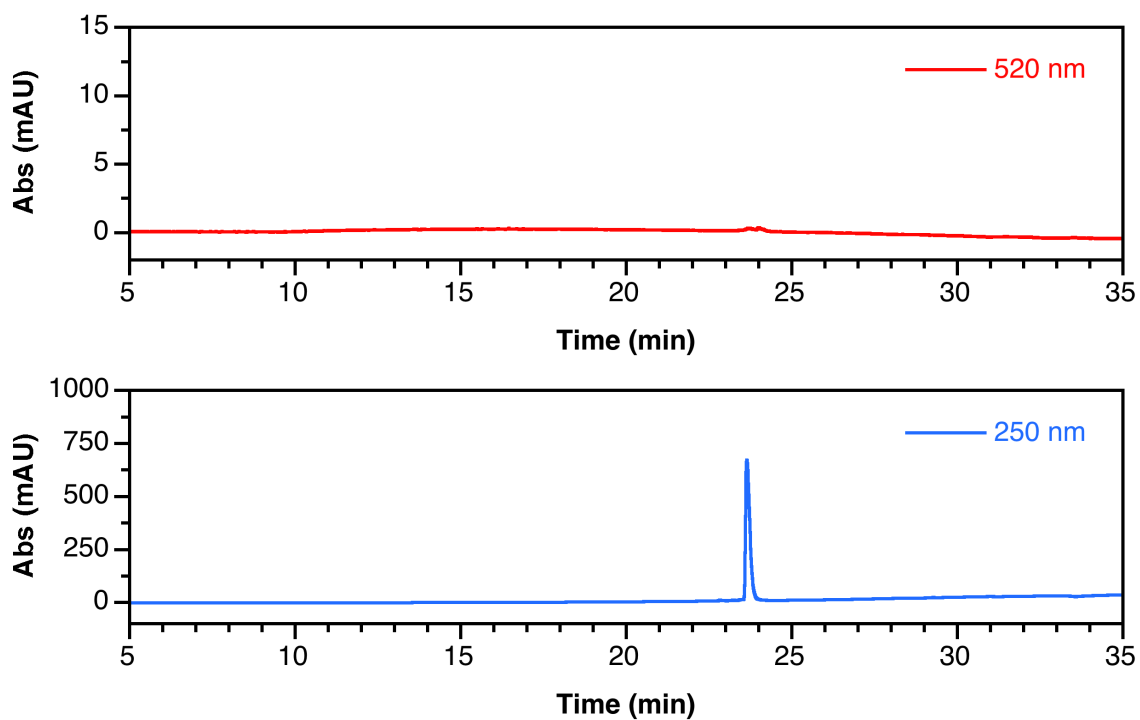

**Figure S43.** Analytical HPLC traces of purified **3**. Absorbance monitored at 520 nm (top) and 250 nm (bottom) using solvent gradient 8 (Table S1).

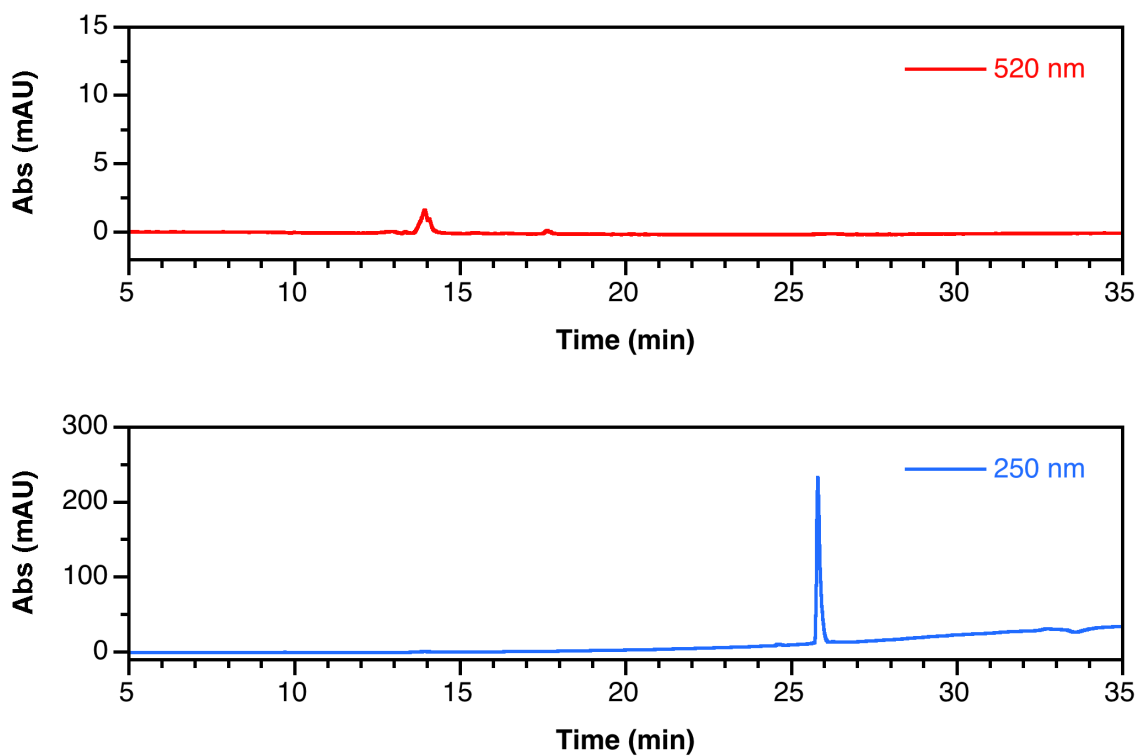

**Figure S44.** Analytical HPLC traces of purified **4**. Absorbance monitored at 520 nm (top) and 250 nm (bottom) using solvent gradient 8 (Table S1).

**NMR Spectra.**

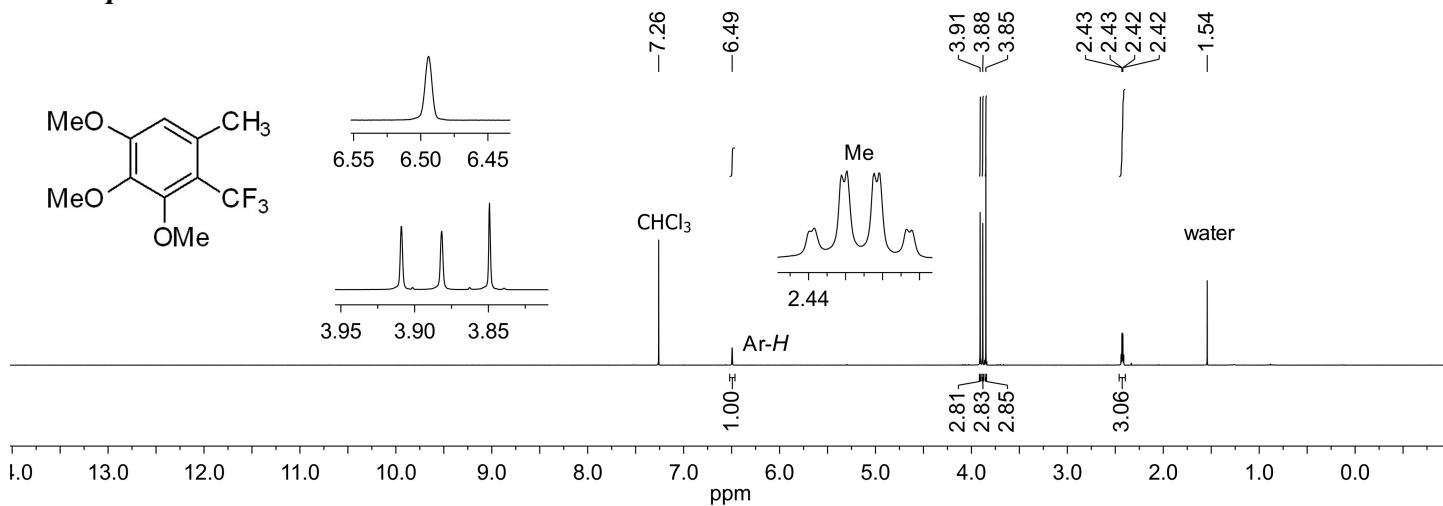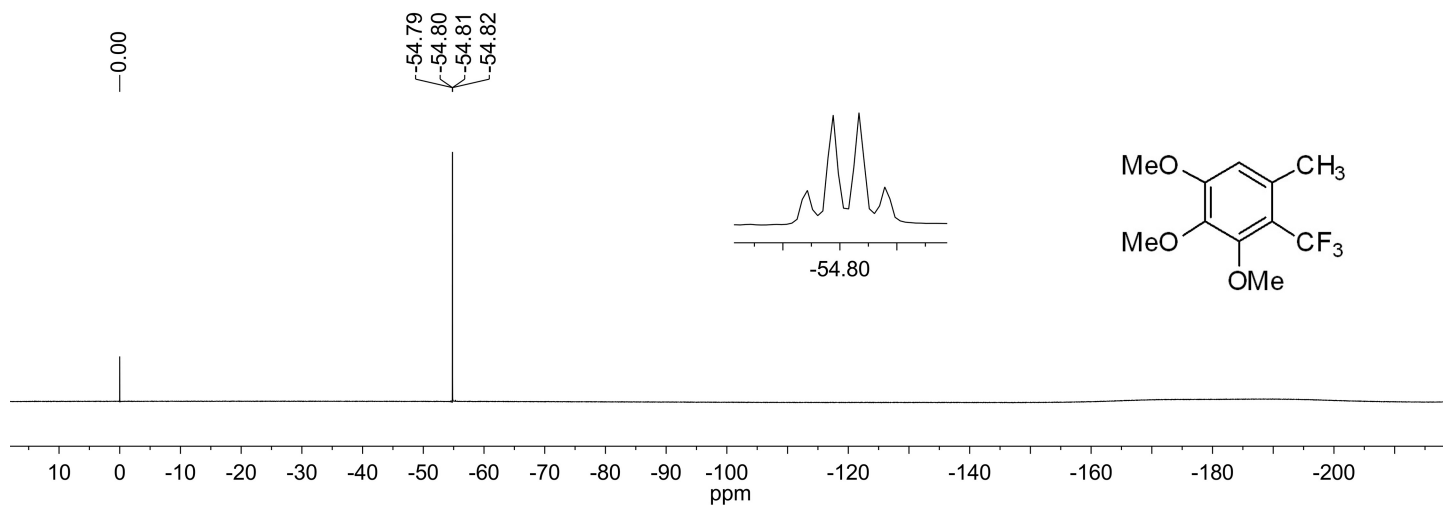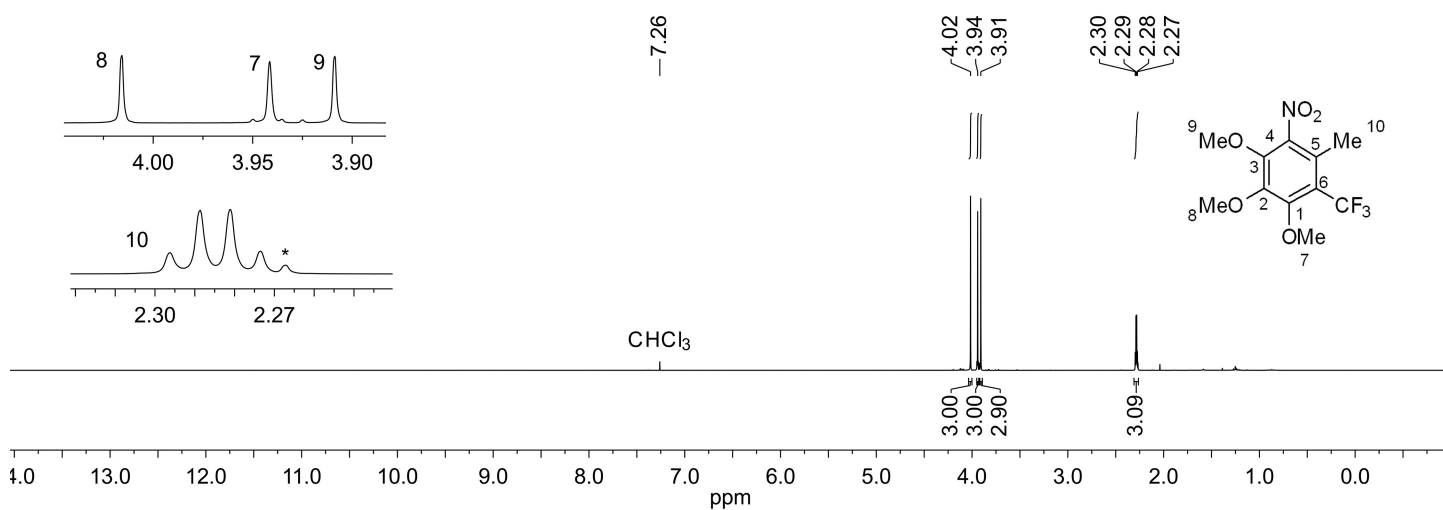

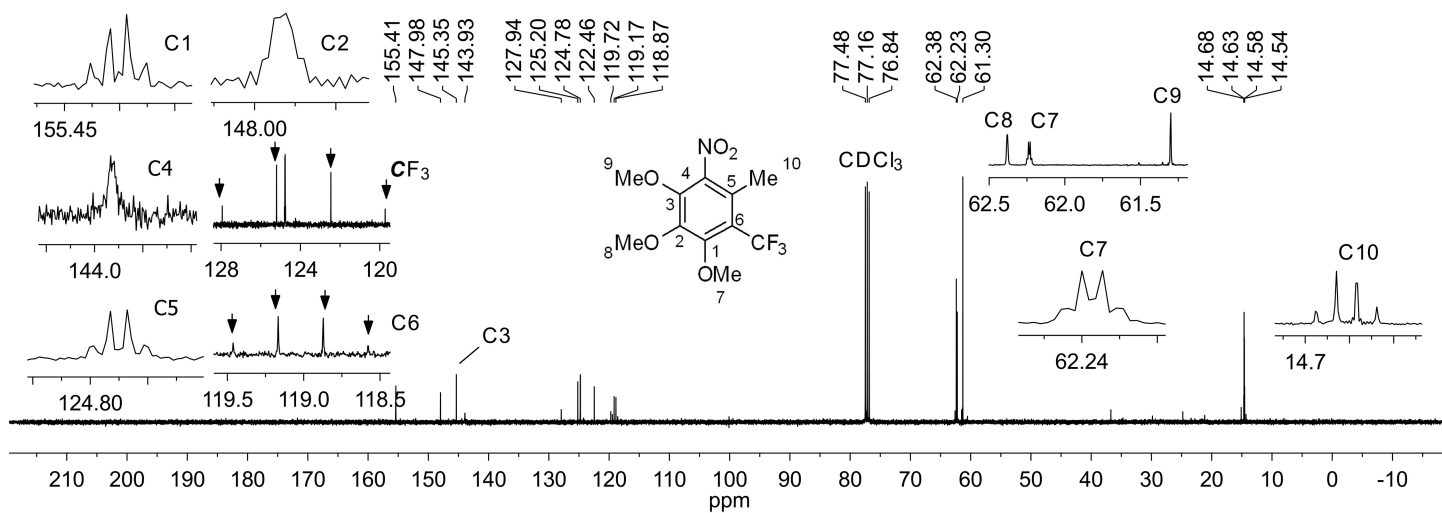

Figure S48.  $^{13}\text{C}\{^1\text{H}\}$  NMR spectrum of **S3**.

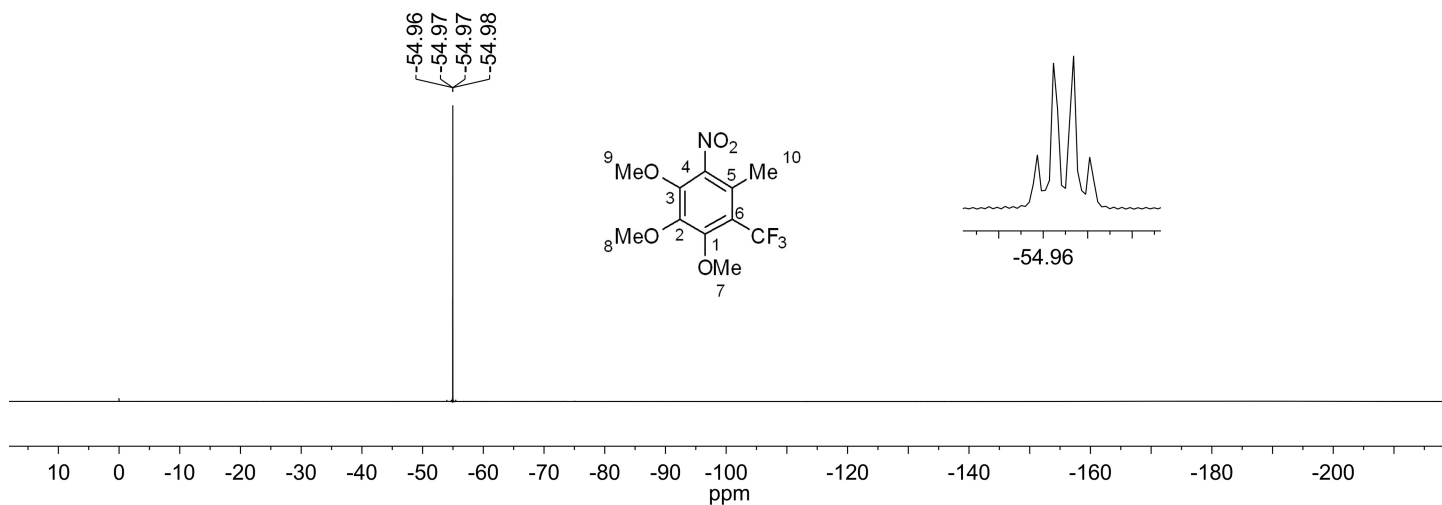

Figure S49.  $^{19}\text{F}$  NMR spectrum of **S3**.

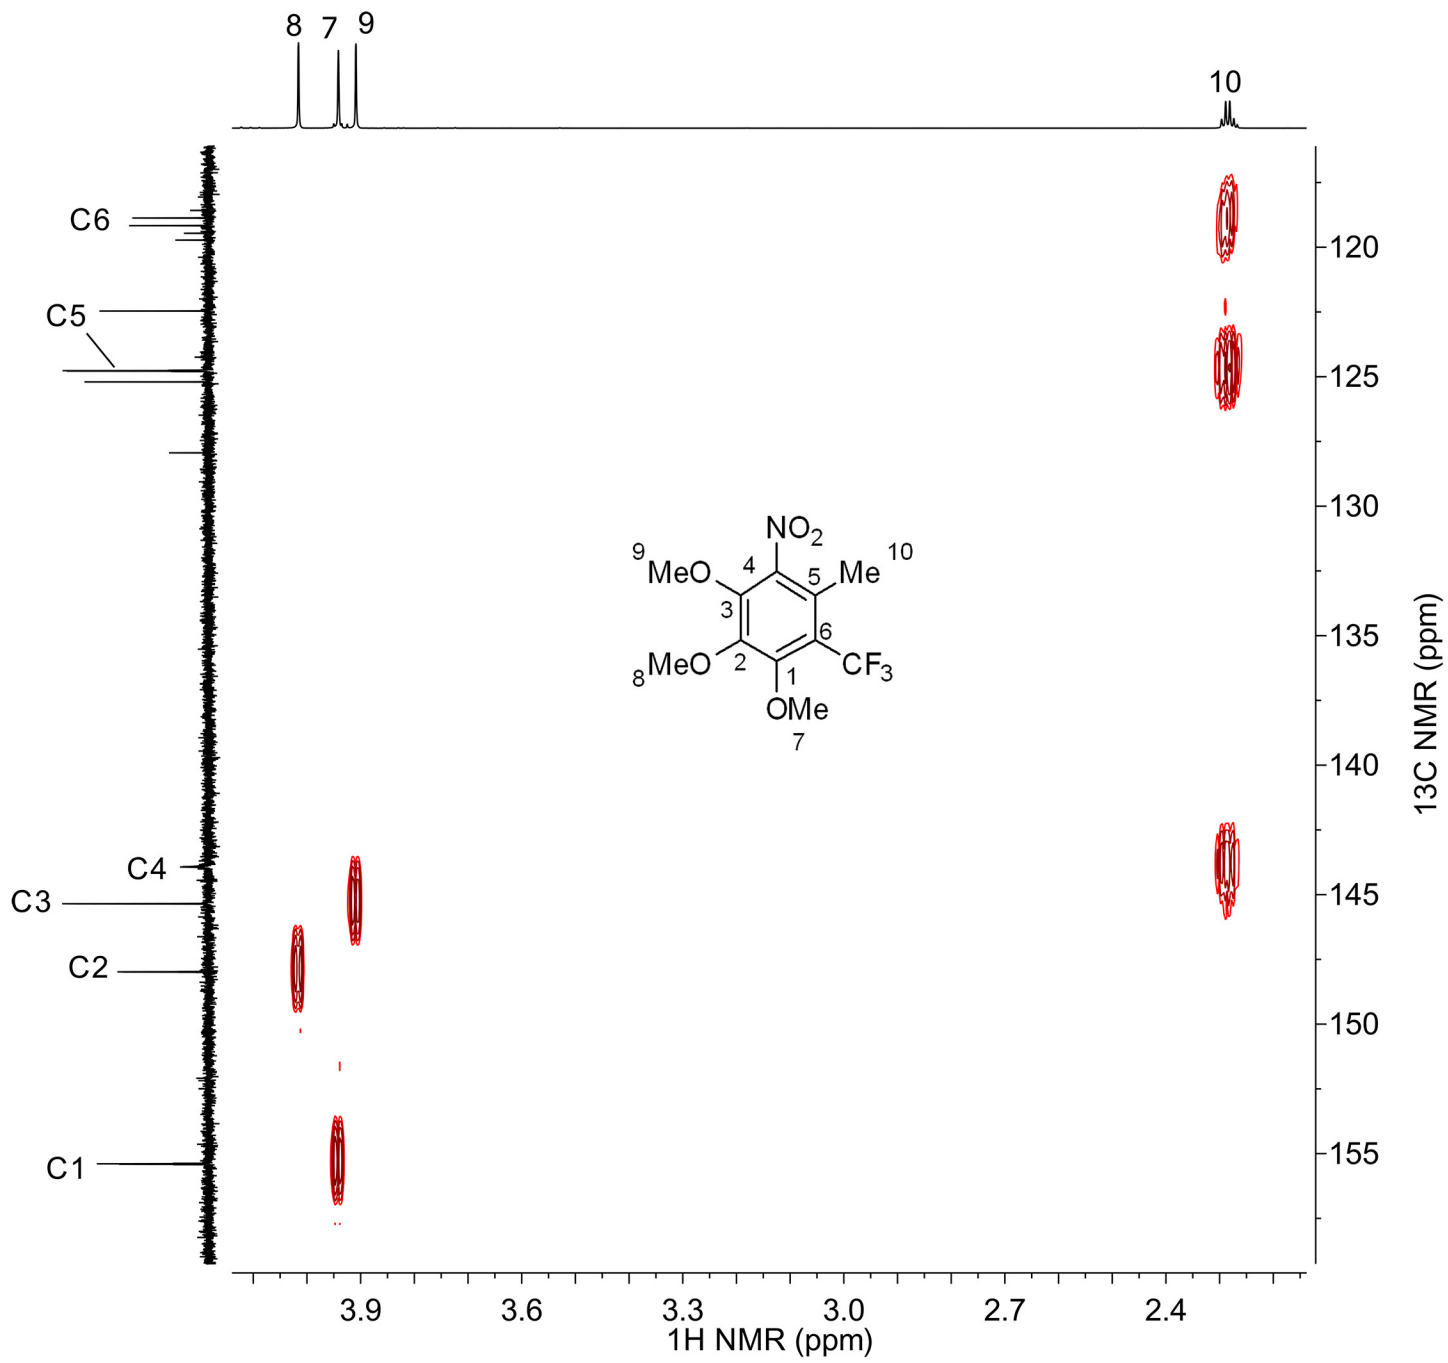

Figure S50.  $^1\text{H}$ - $^{13}\text{C}$  HMBC spectrum of S3.

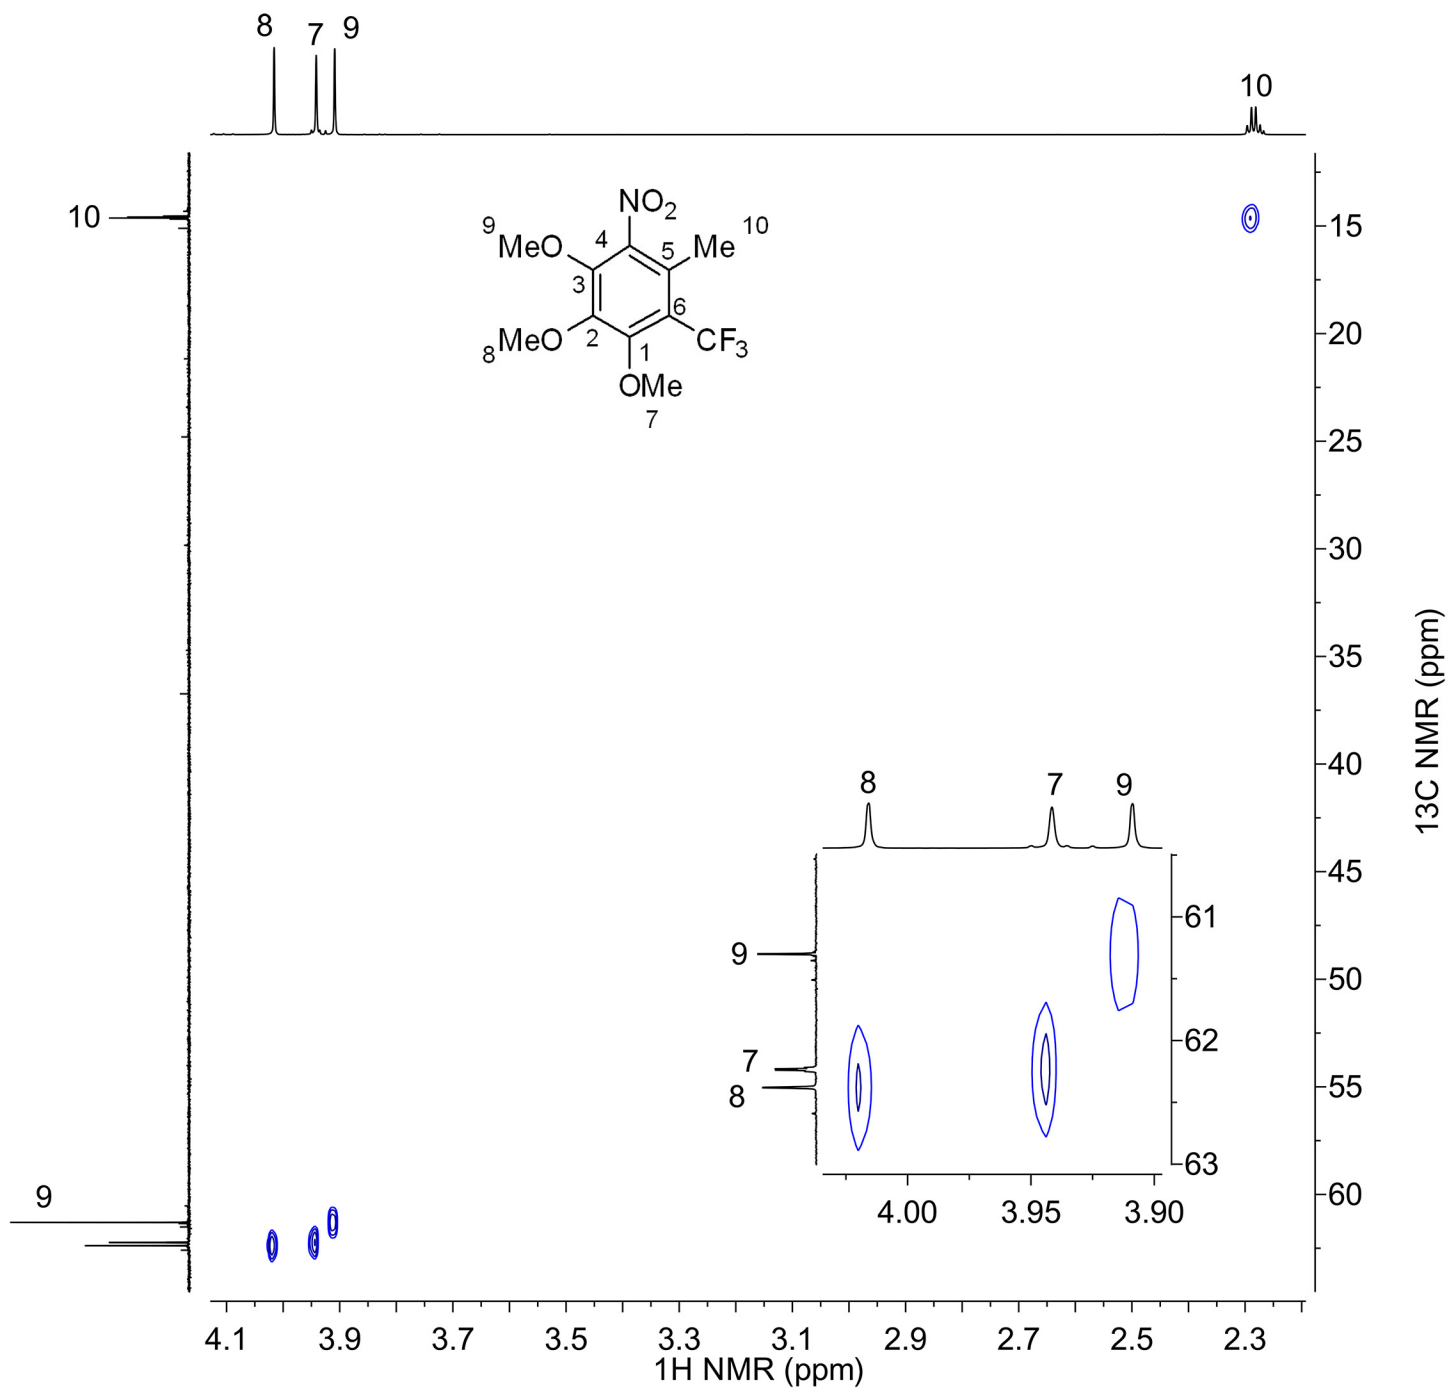

**Figure S51.**  $^1\text{H}$ - $^{13}\text{C}$  HSQC spectrum of **S3**.

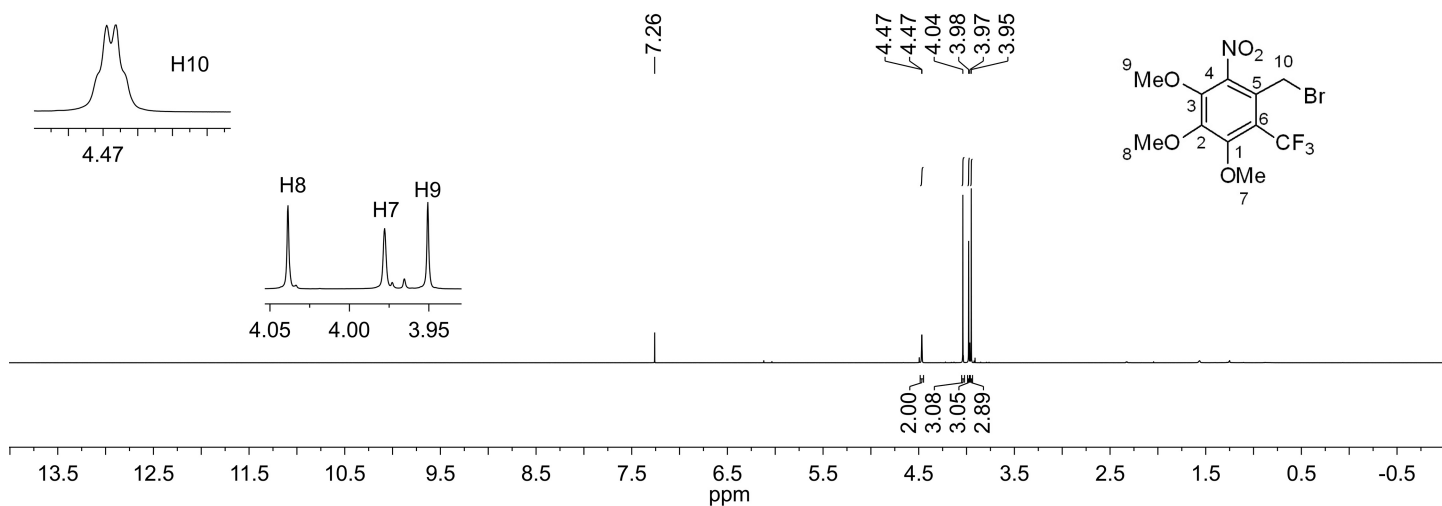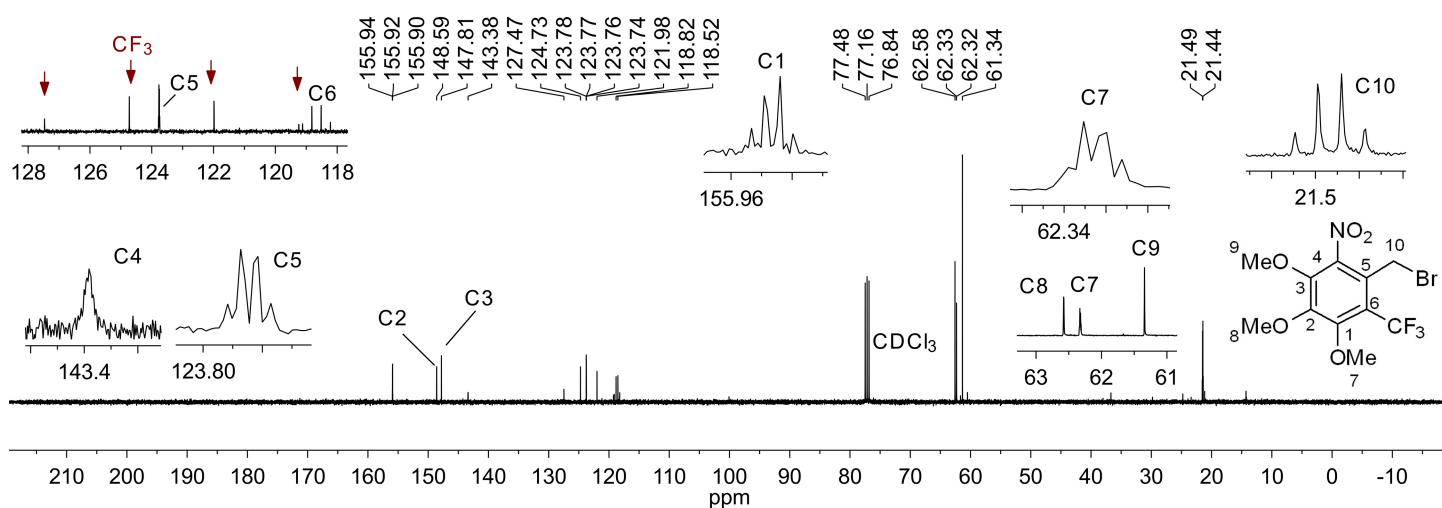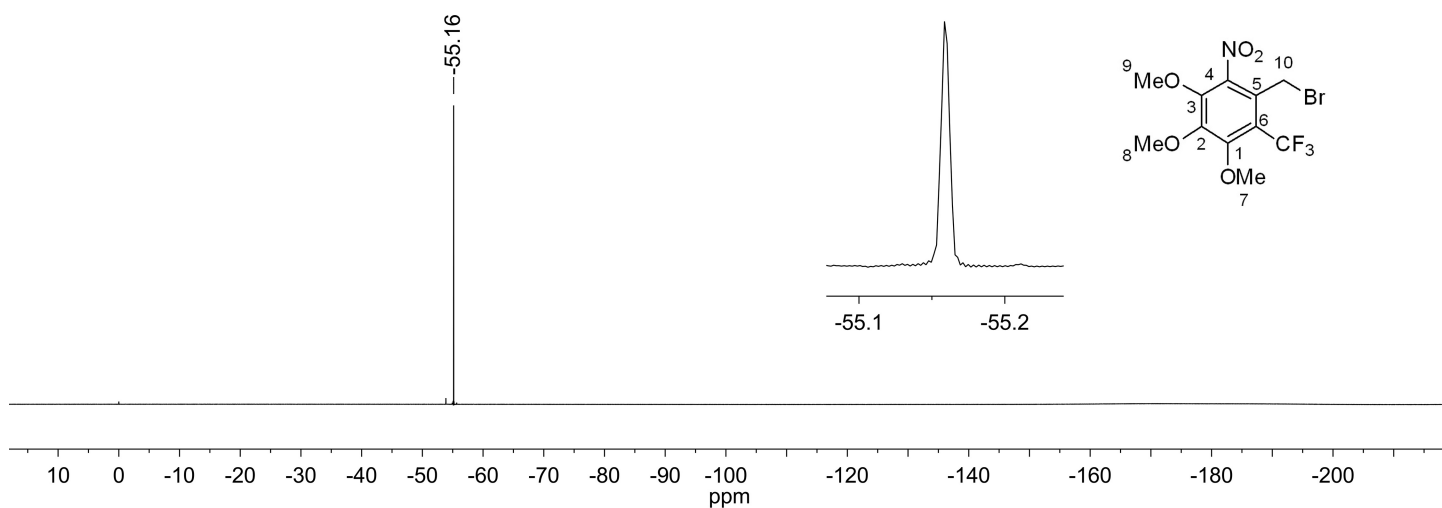



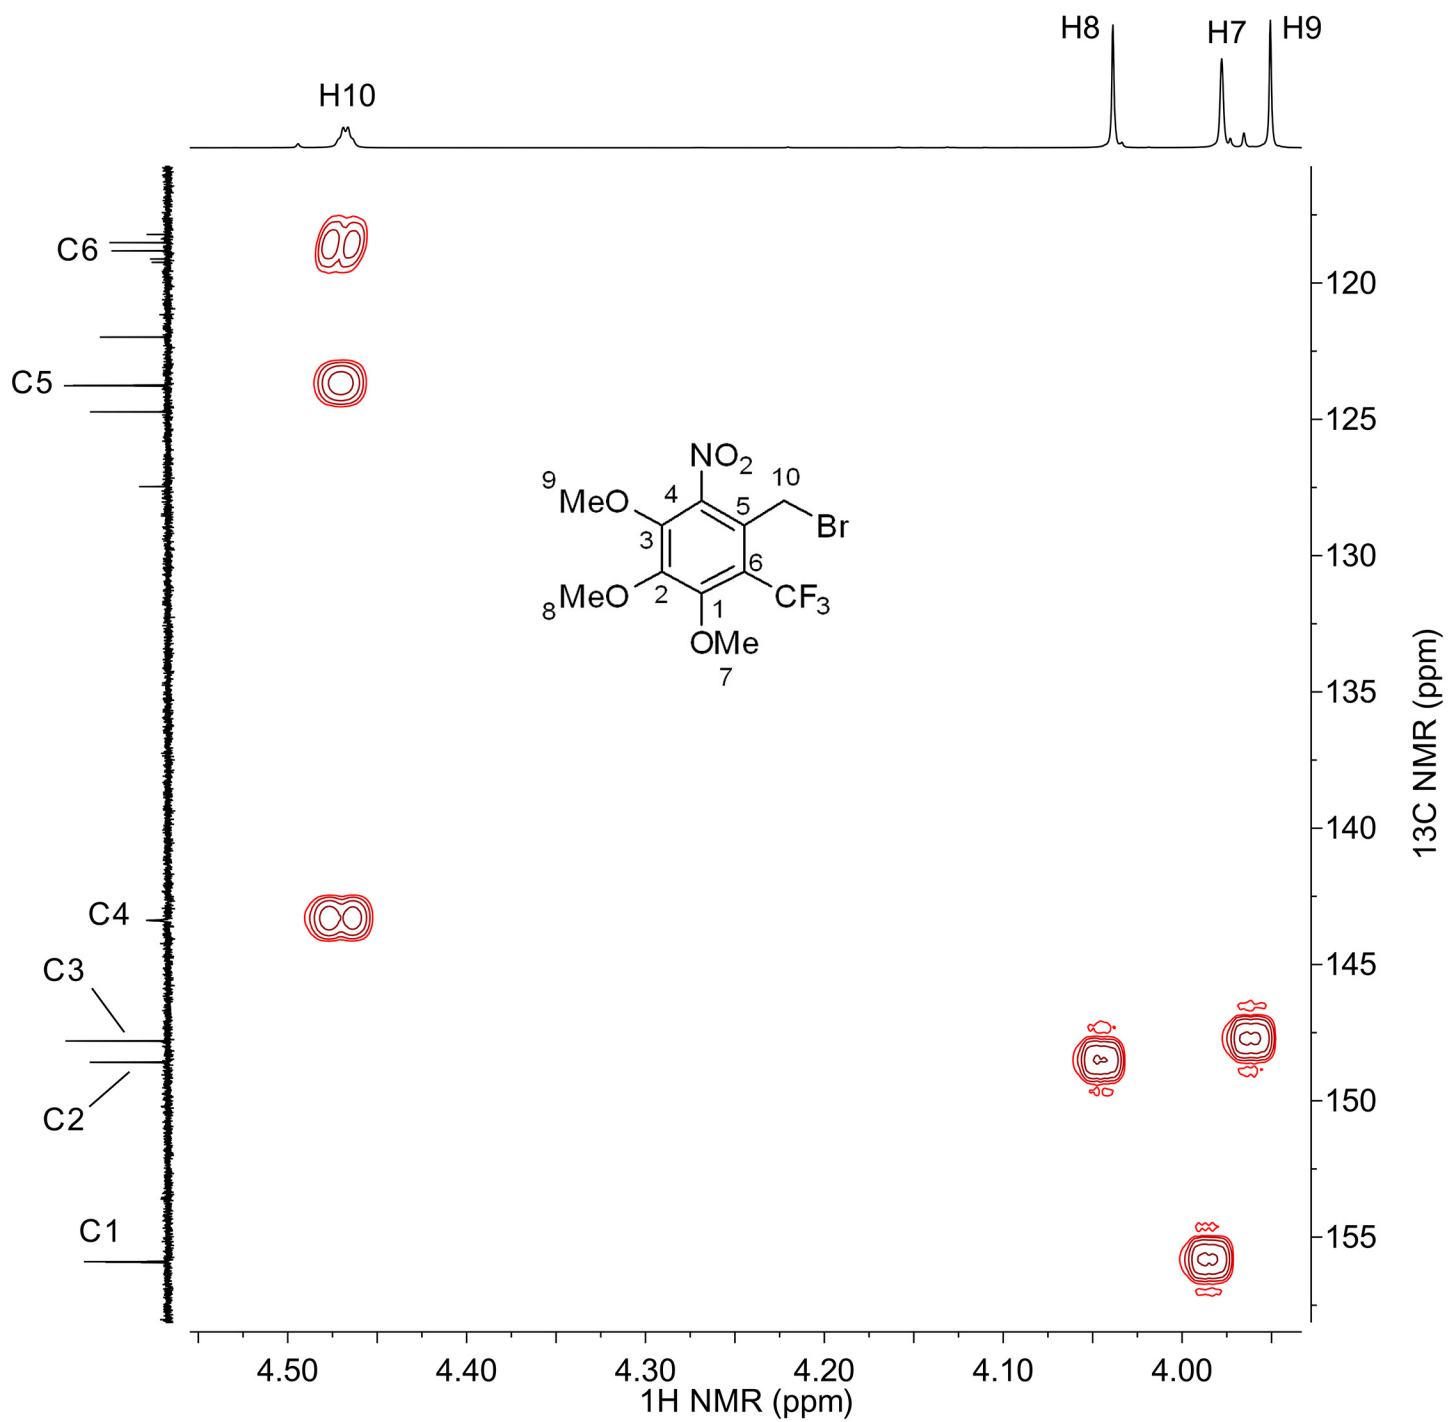

Figure S55.  $^1\text{H}$ - $^{13}\text{C}$  HMBC spectrum of **S4**.

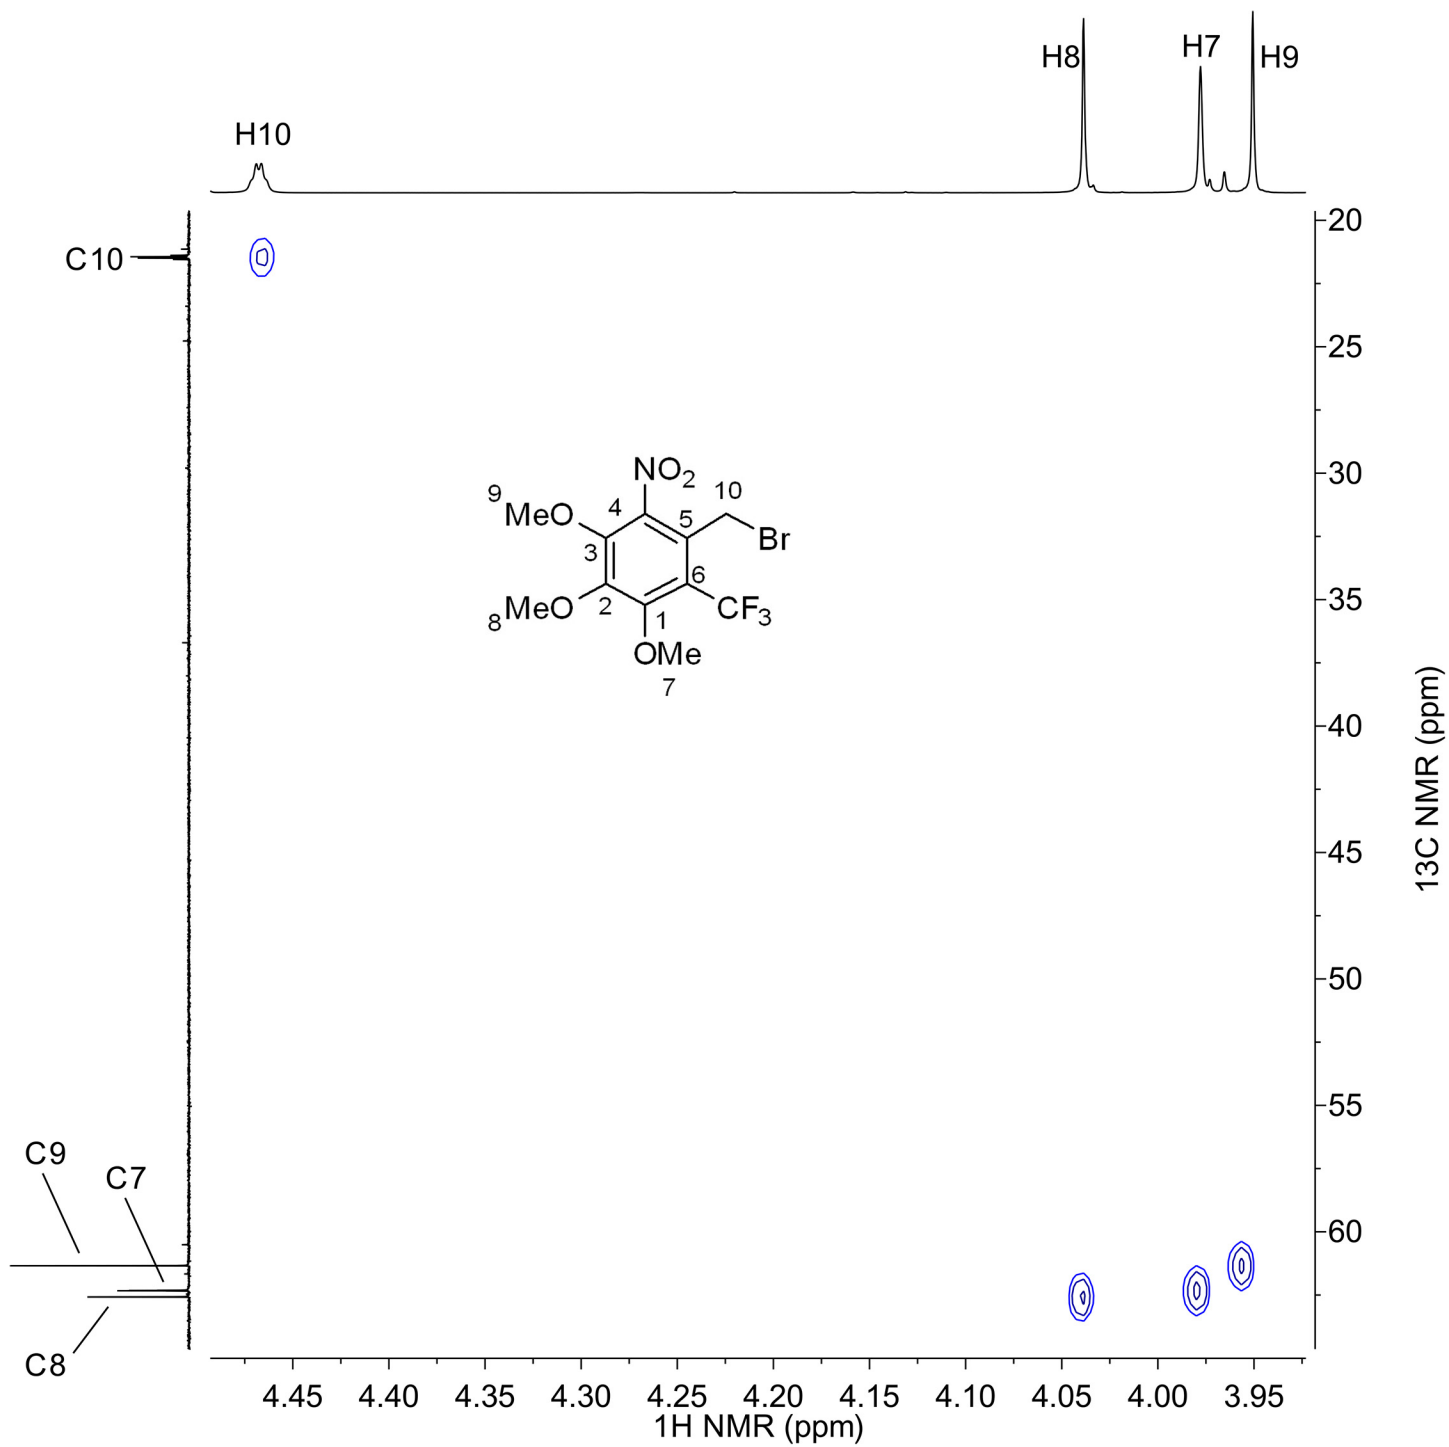

Figure S56. <sup>1</sup>H-<sup>13</sup>C HSQC spectrum of **S4**.

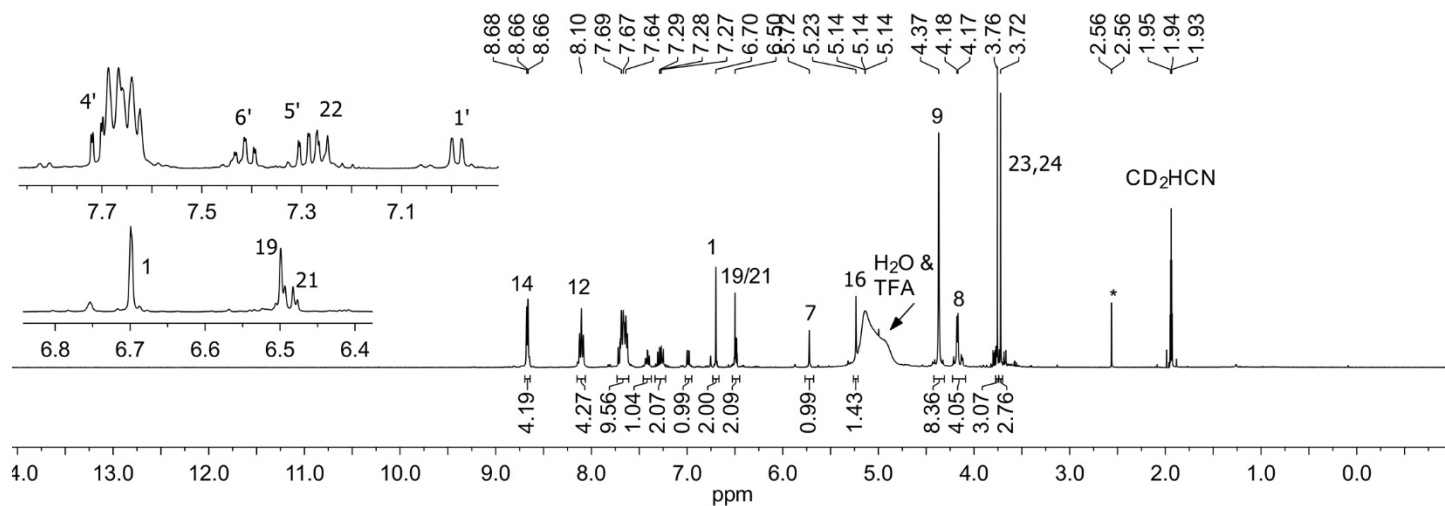

Figure S57.  $^1\text{H}$  NMR spectrum of **S5**.

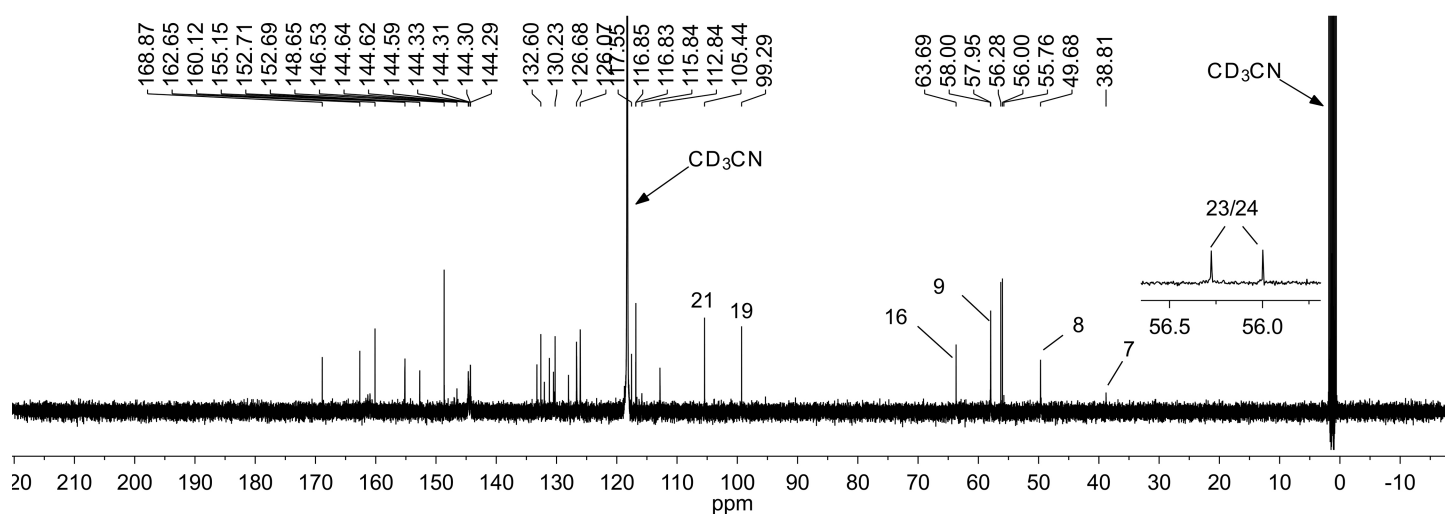

Figure S58.  $^{13}\text{C}\{^1\text{H}\}$  NMR spectrum of **S5**.

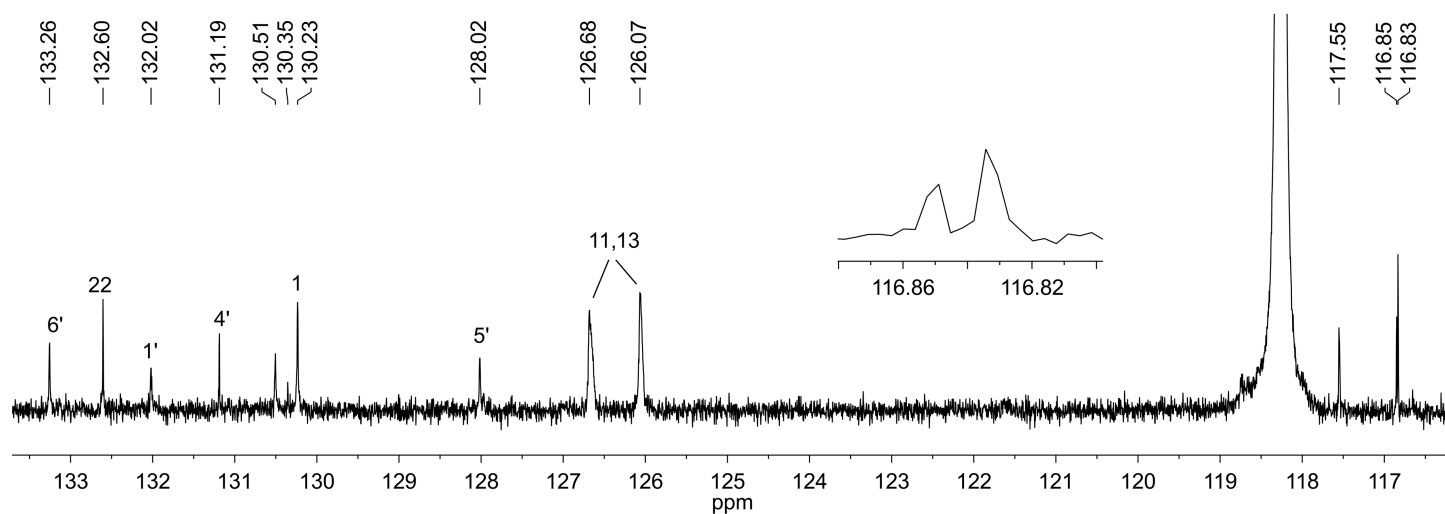

Figure S59. Expansion of  $^{13}\text{C}\{^1\text{H}\}$  NMR spectrum of **S5** from 116 to 134 ppm.

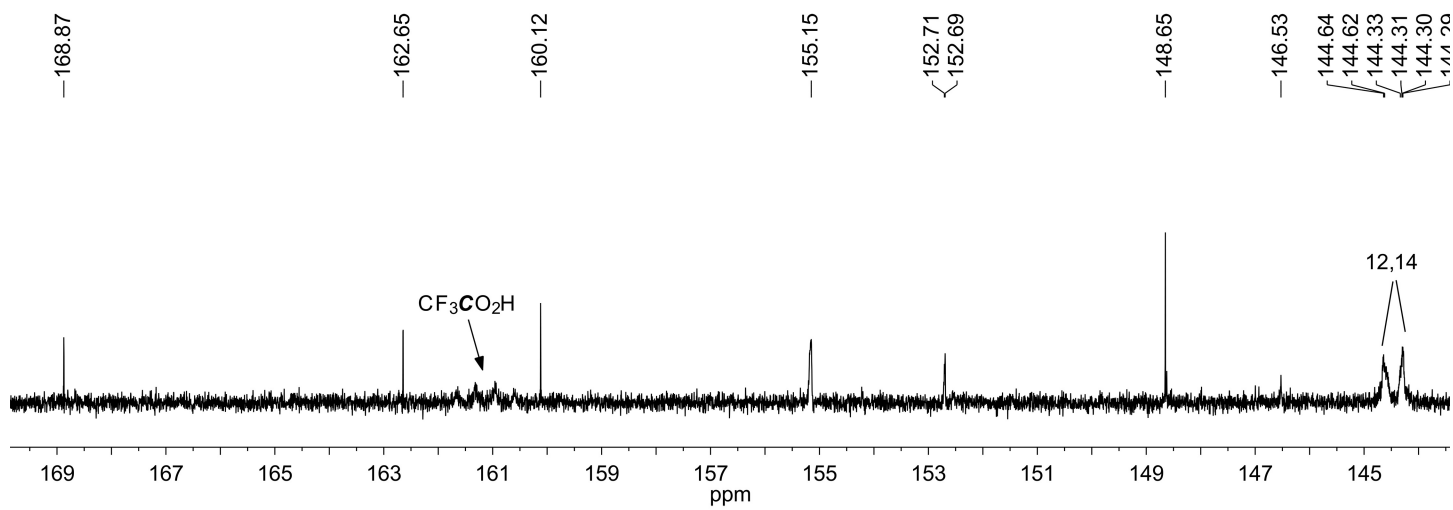

**Figure S60.** Expansion of  $^{13}\text{C}\{^1\text{H}\}$  NMR spectrum of **S5** from 144 to 170 ppm.

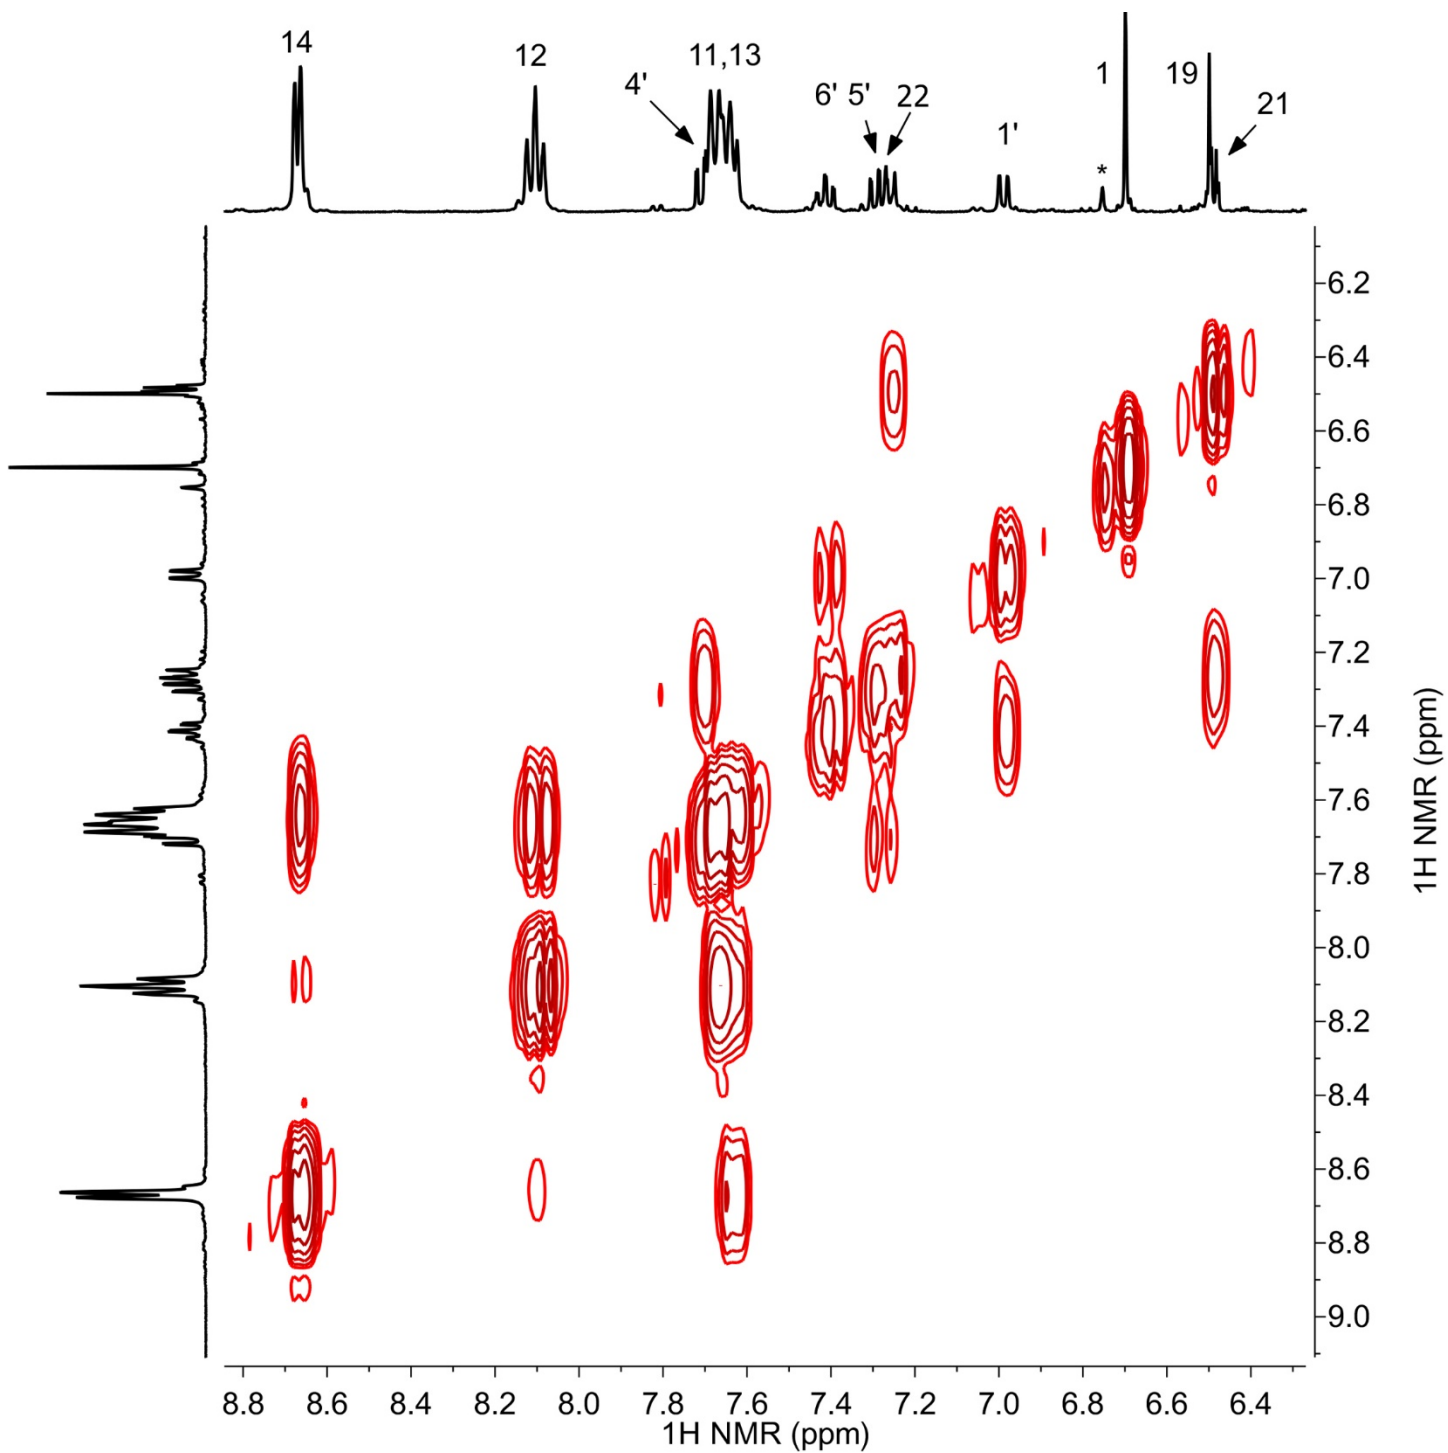

Figure S61.  $^1\text{H}$ - $^1\text{H}$  COSY spectrum of **S5** aromatic region.

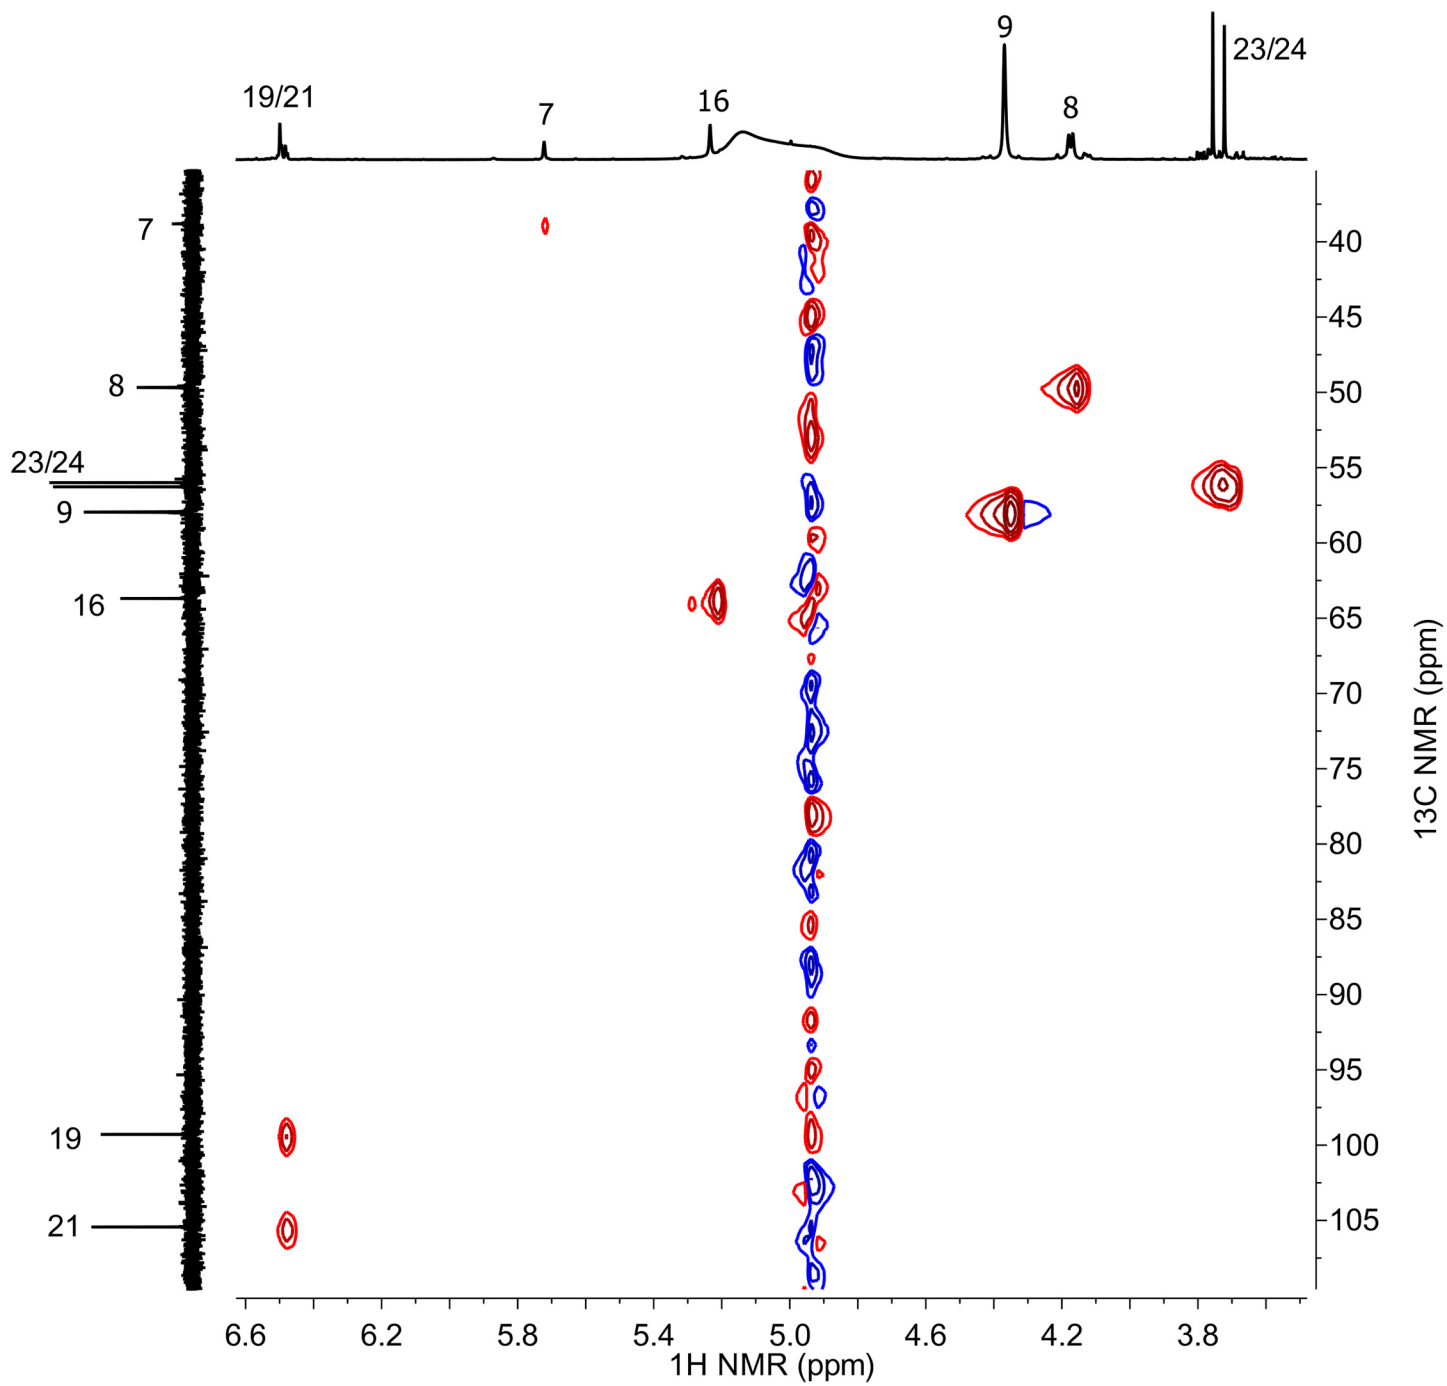

**Figure S62.**  $^1\text{H}$ - $^{13}\text{C}$  HSQC spectrum of **S5** aliphatic region.

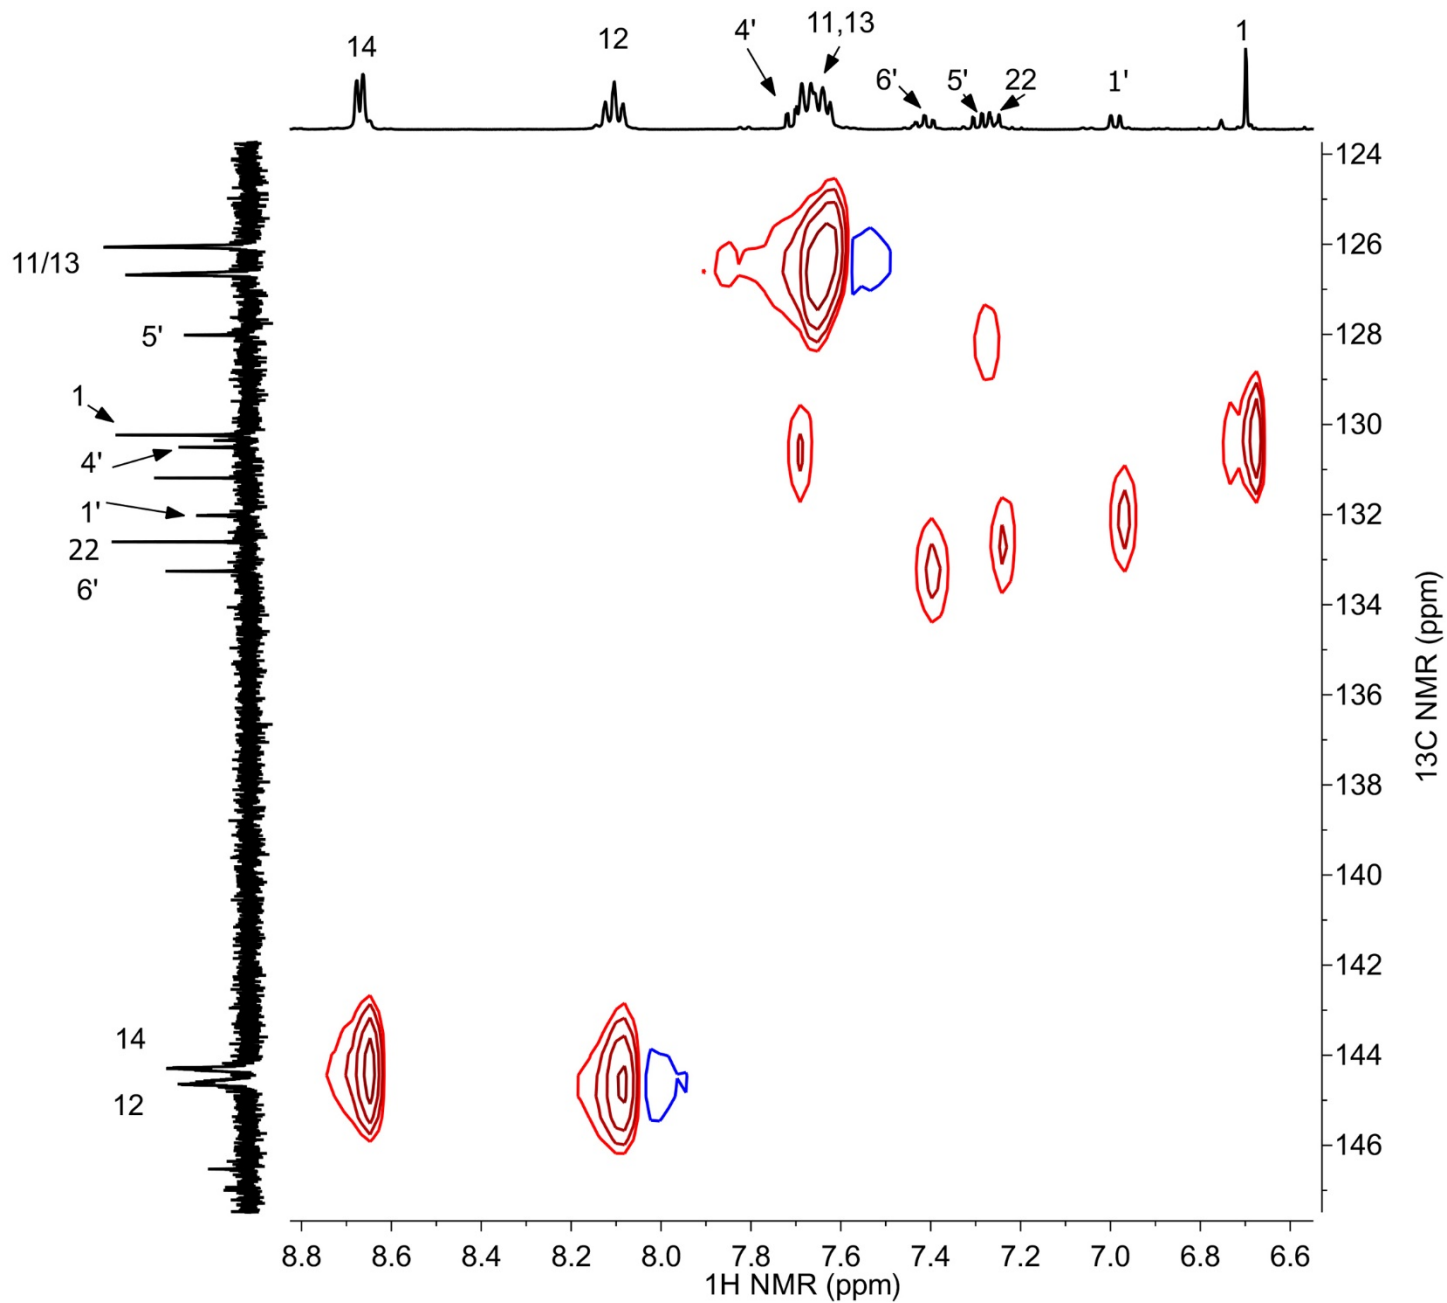

**Figure S63.**  $^1\text{H}$ - $^{13}\text{C}$  HSQC spectrum of **S5** aromatic region.

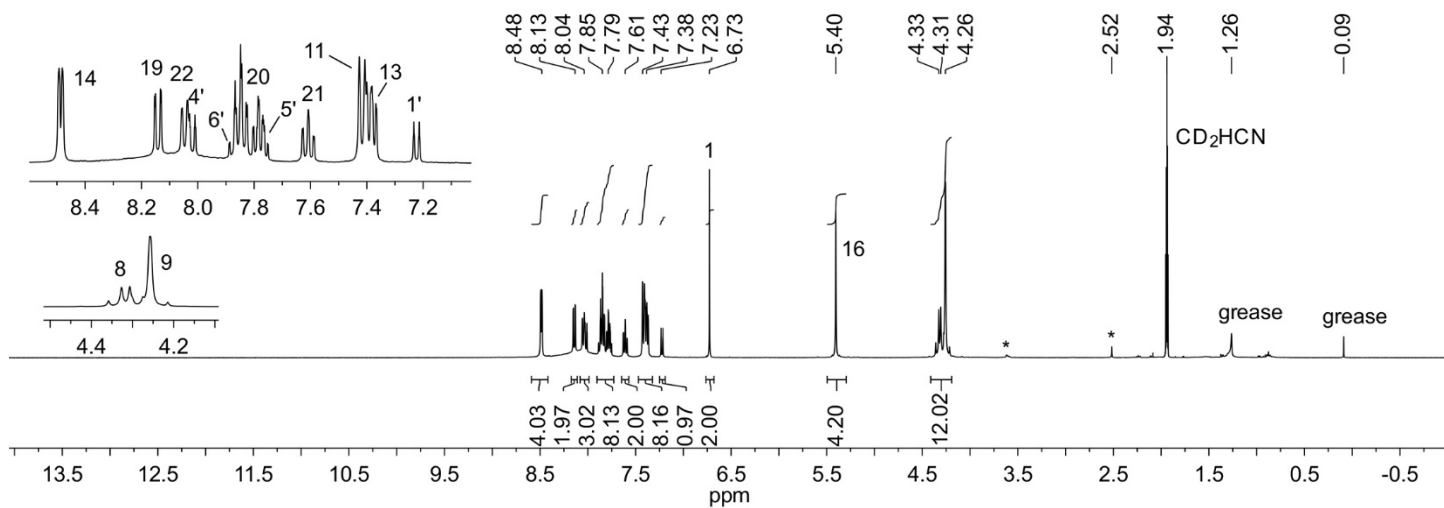

Figure S64.  $^1\text{H}$  NMR spectrum of 1.

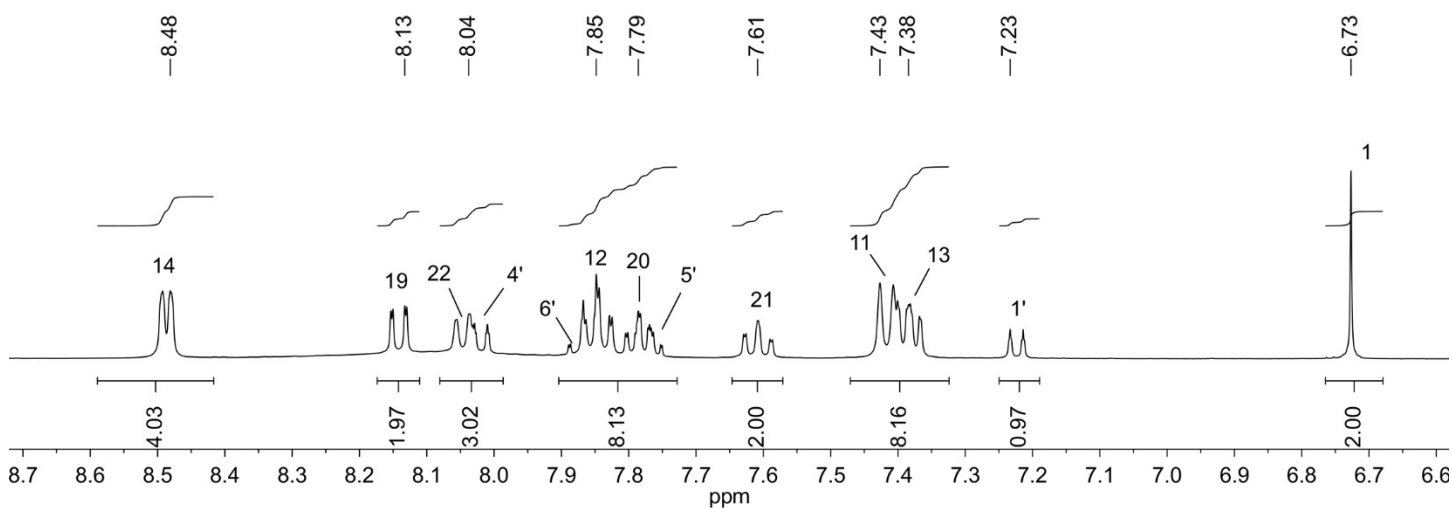

Figure S65. Expansion of  $^1\text{H}$  NMR spectrum of 1.

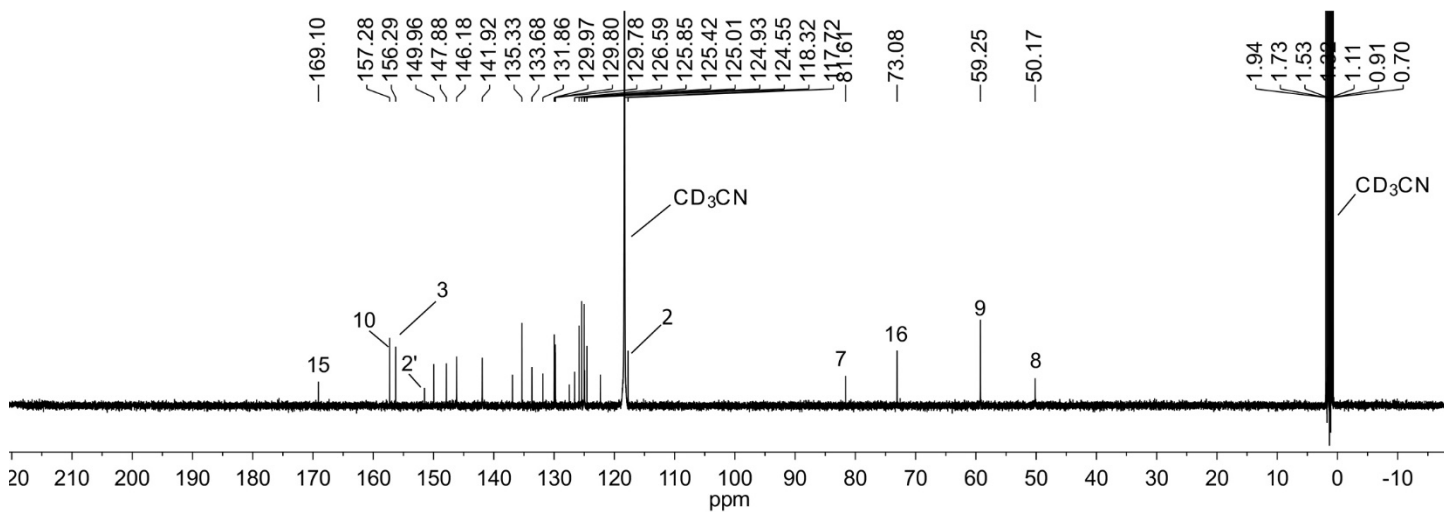

Figure S66.  $^{13}\text{C}\{^1\text{H}\}$  NMR spectrum of 1.



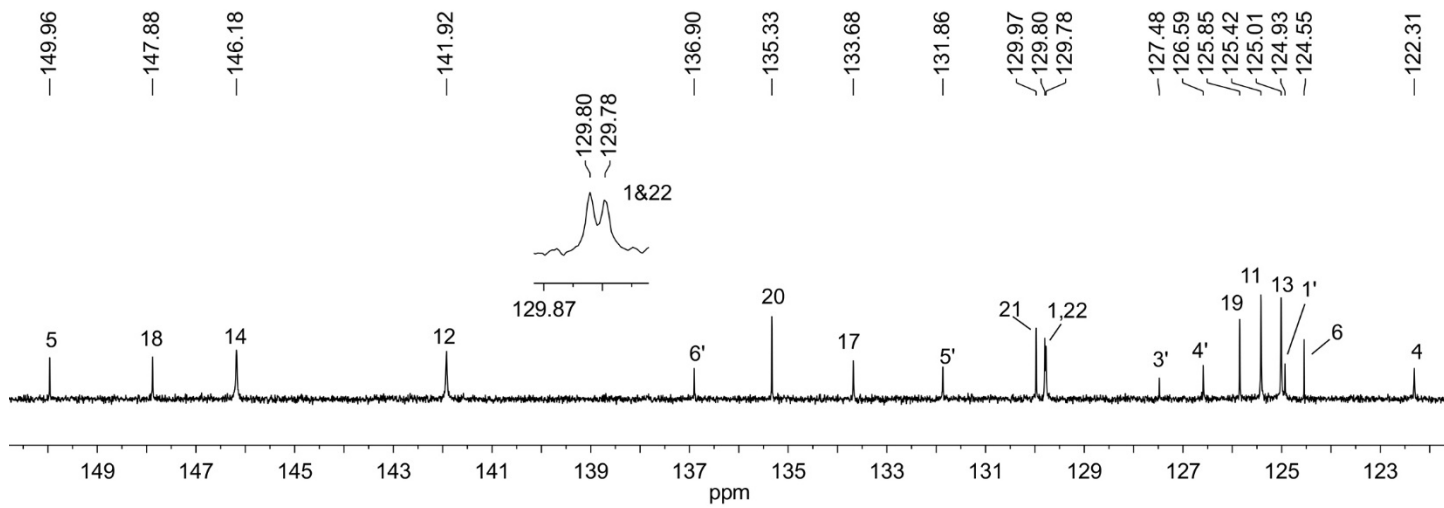

**Figure S67.** Expansion of  $^{13}\text{C}\{^1\text{H}\}$  NMR spectrum of **1**.

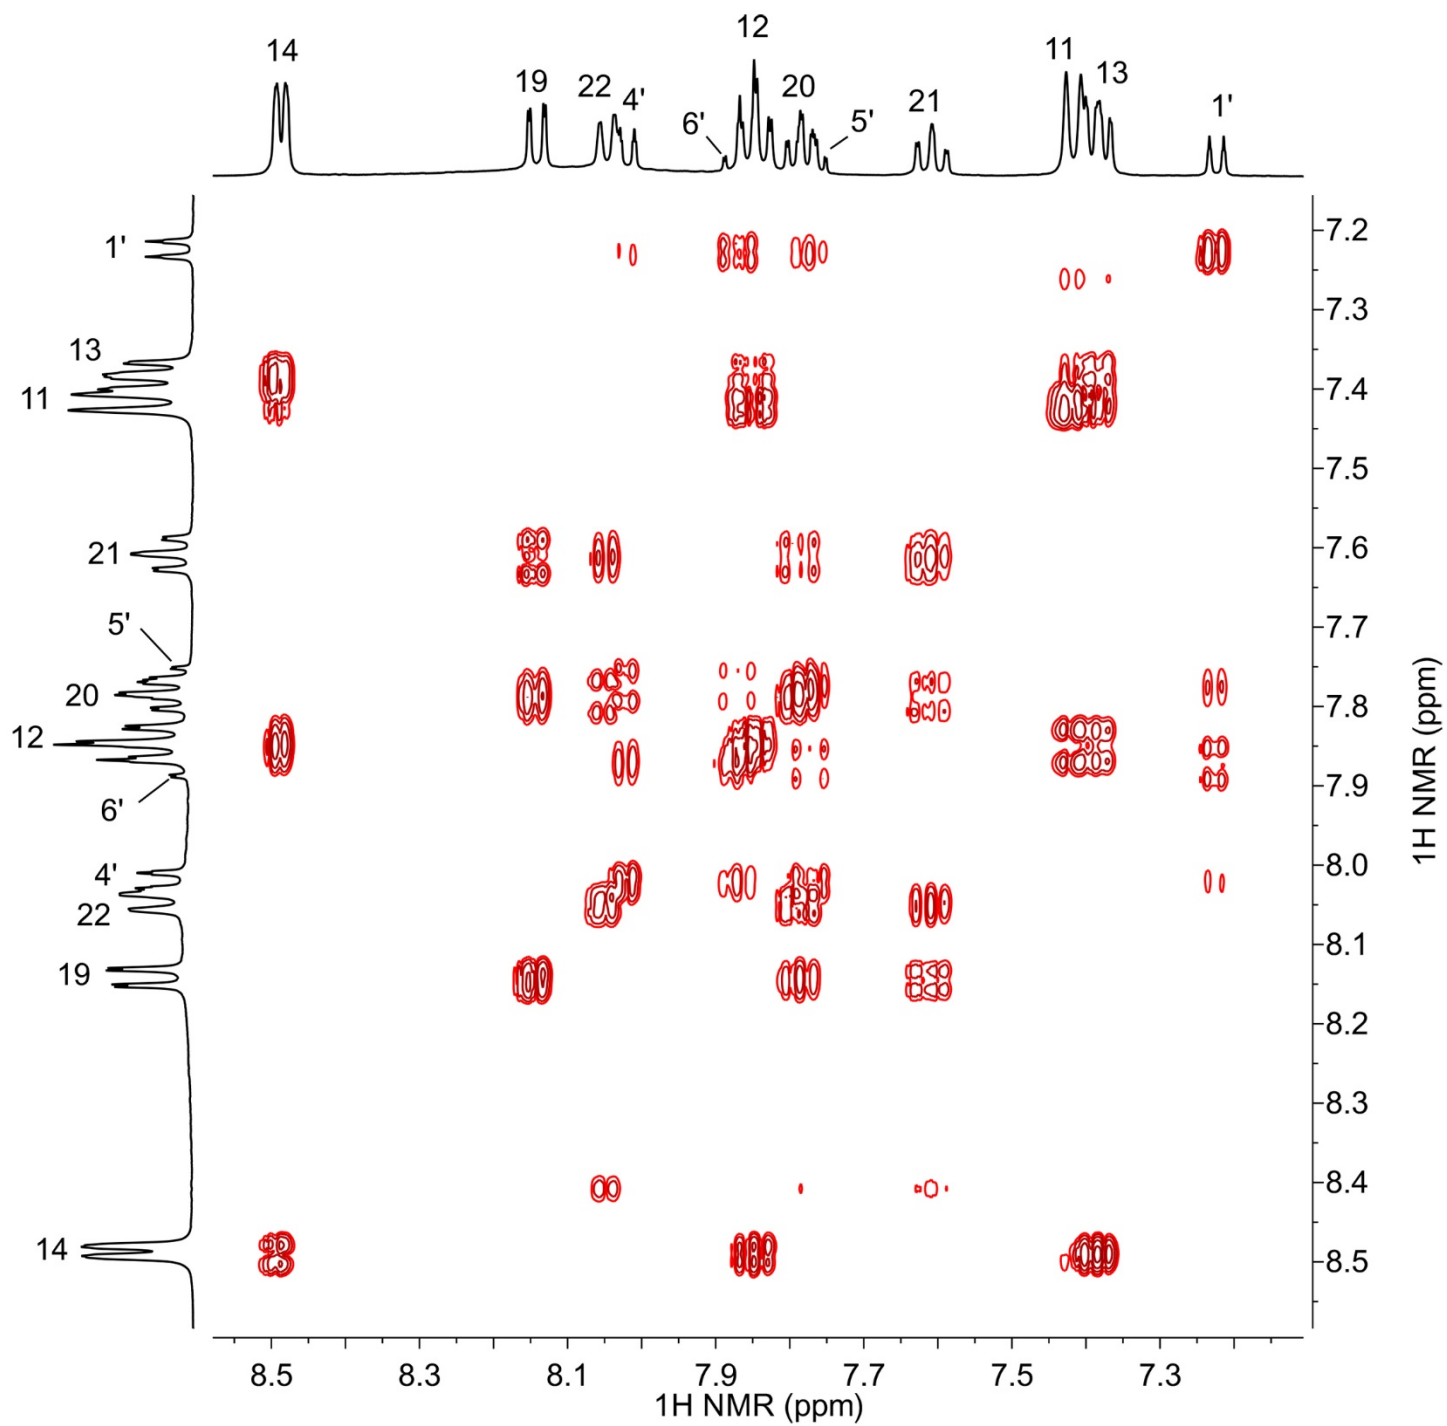

Figure S68.  $^1\text{H}$ - $^1\text{H}$  COSY spectrum of **1**.

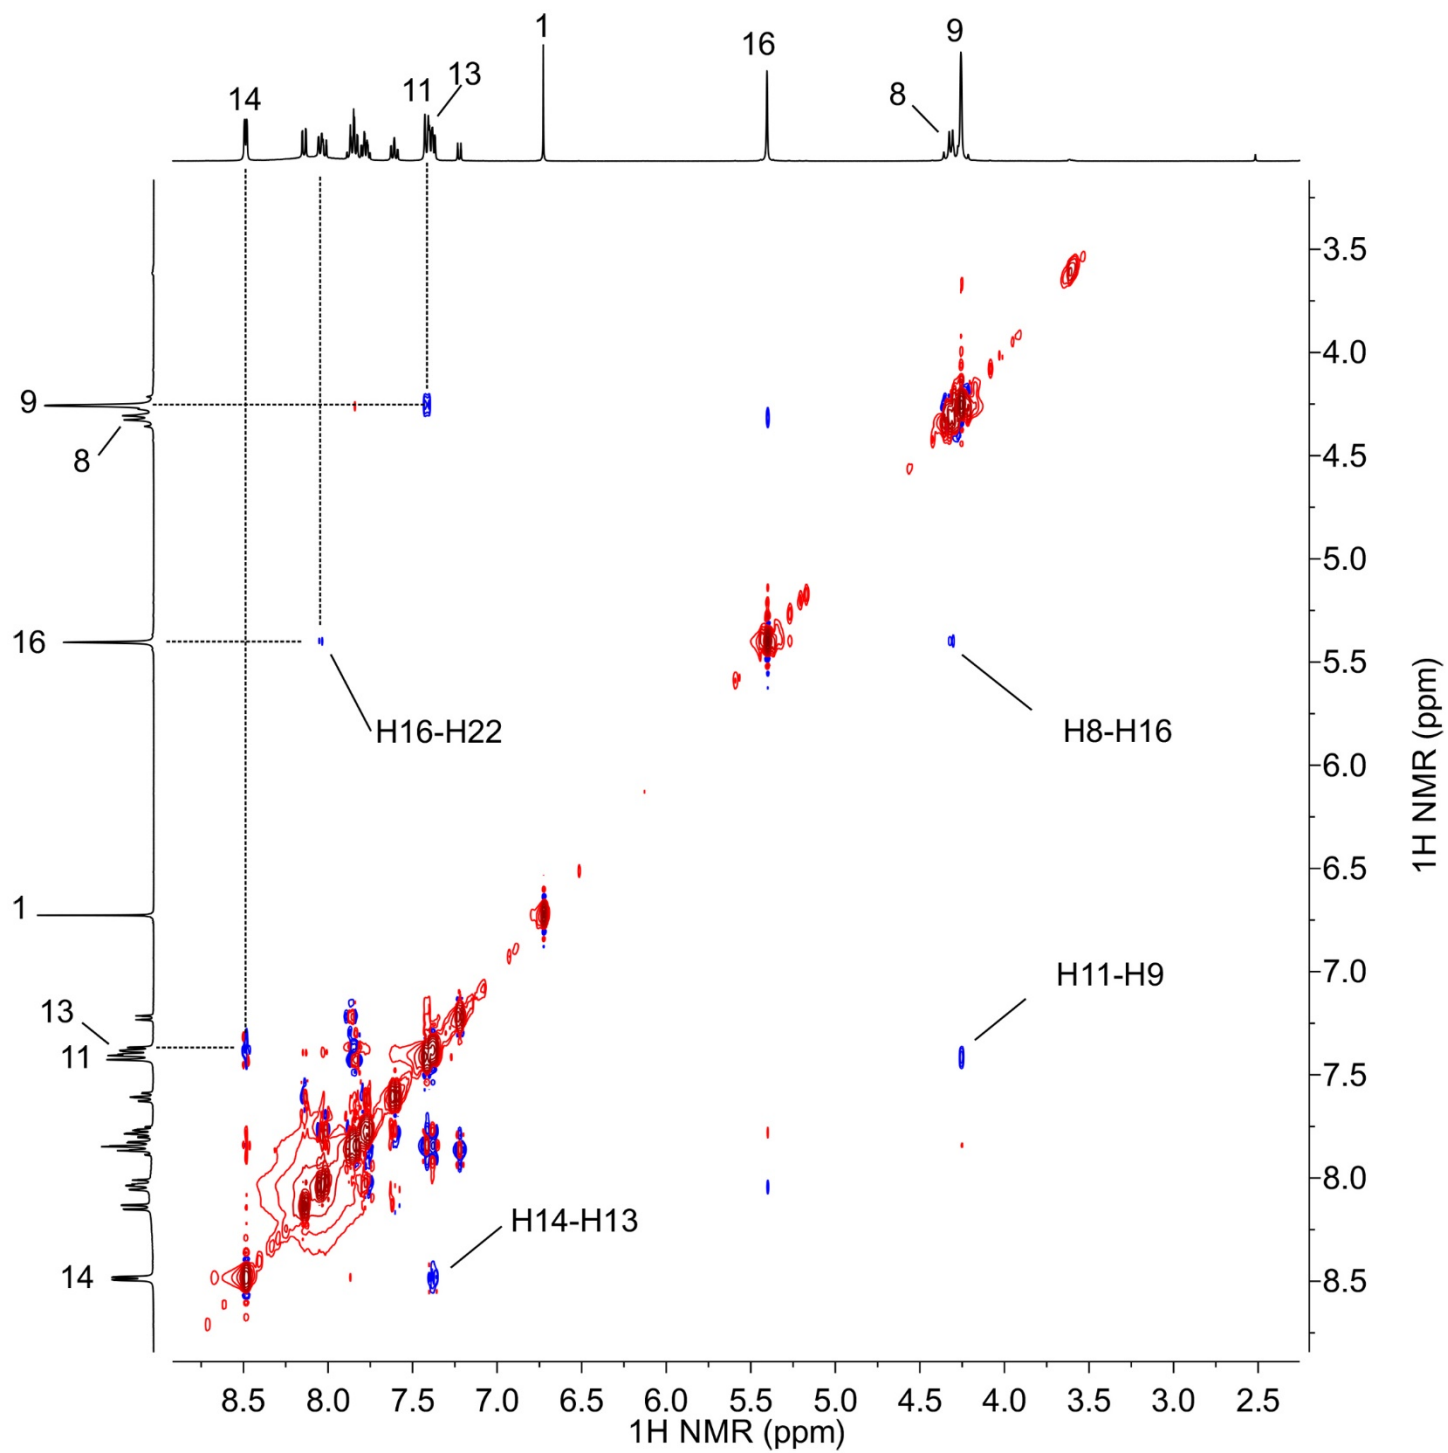

Figure S69.  $^1\text{H}$ - $^1\text{H}$  NOESY spectrum of 1.

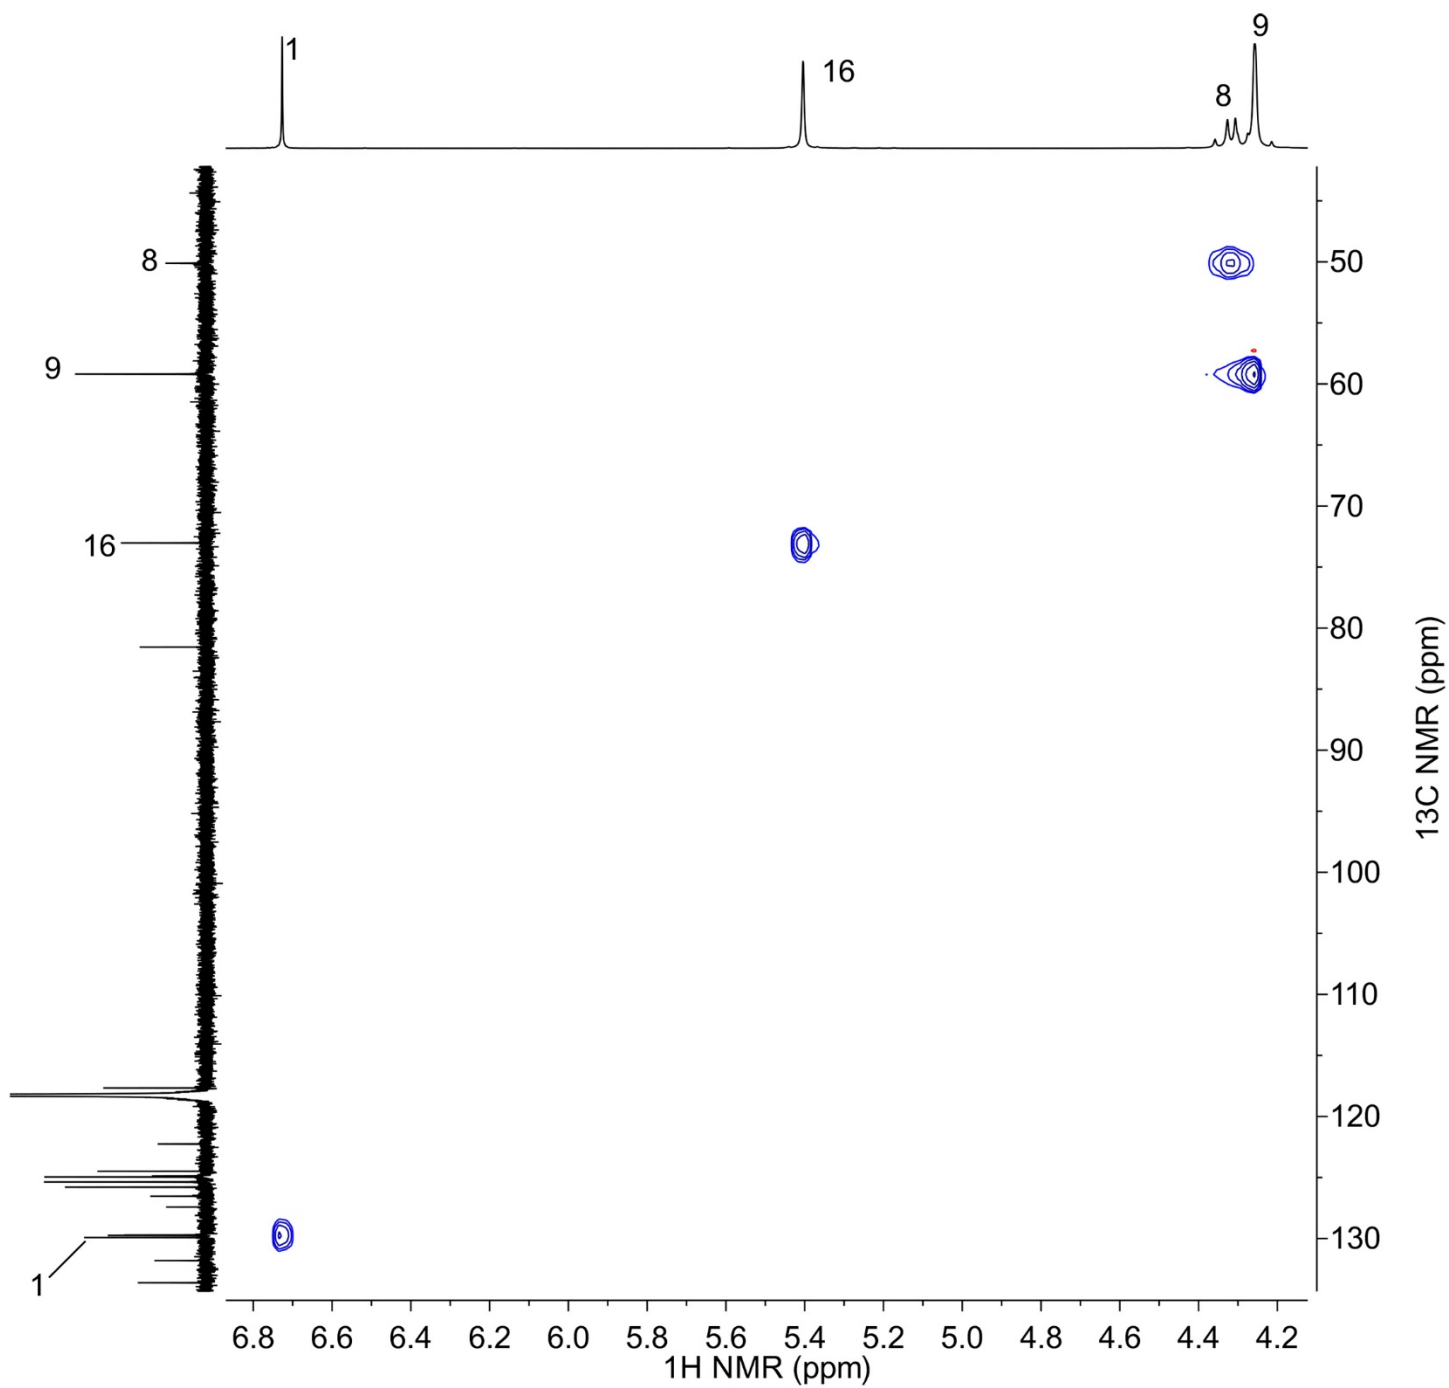

**Figure S70.**  $^1\text{H}$ - $^{13}\text{C}$  HSQC spectrum of **1** from 4.2 to 6.8 ppm ( $^1\text{H}$ ) and 40 to 135 ppm ( $^{13}\text{C}$ ).

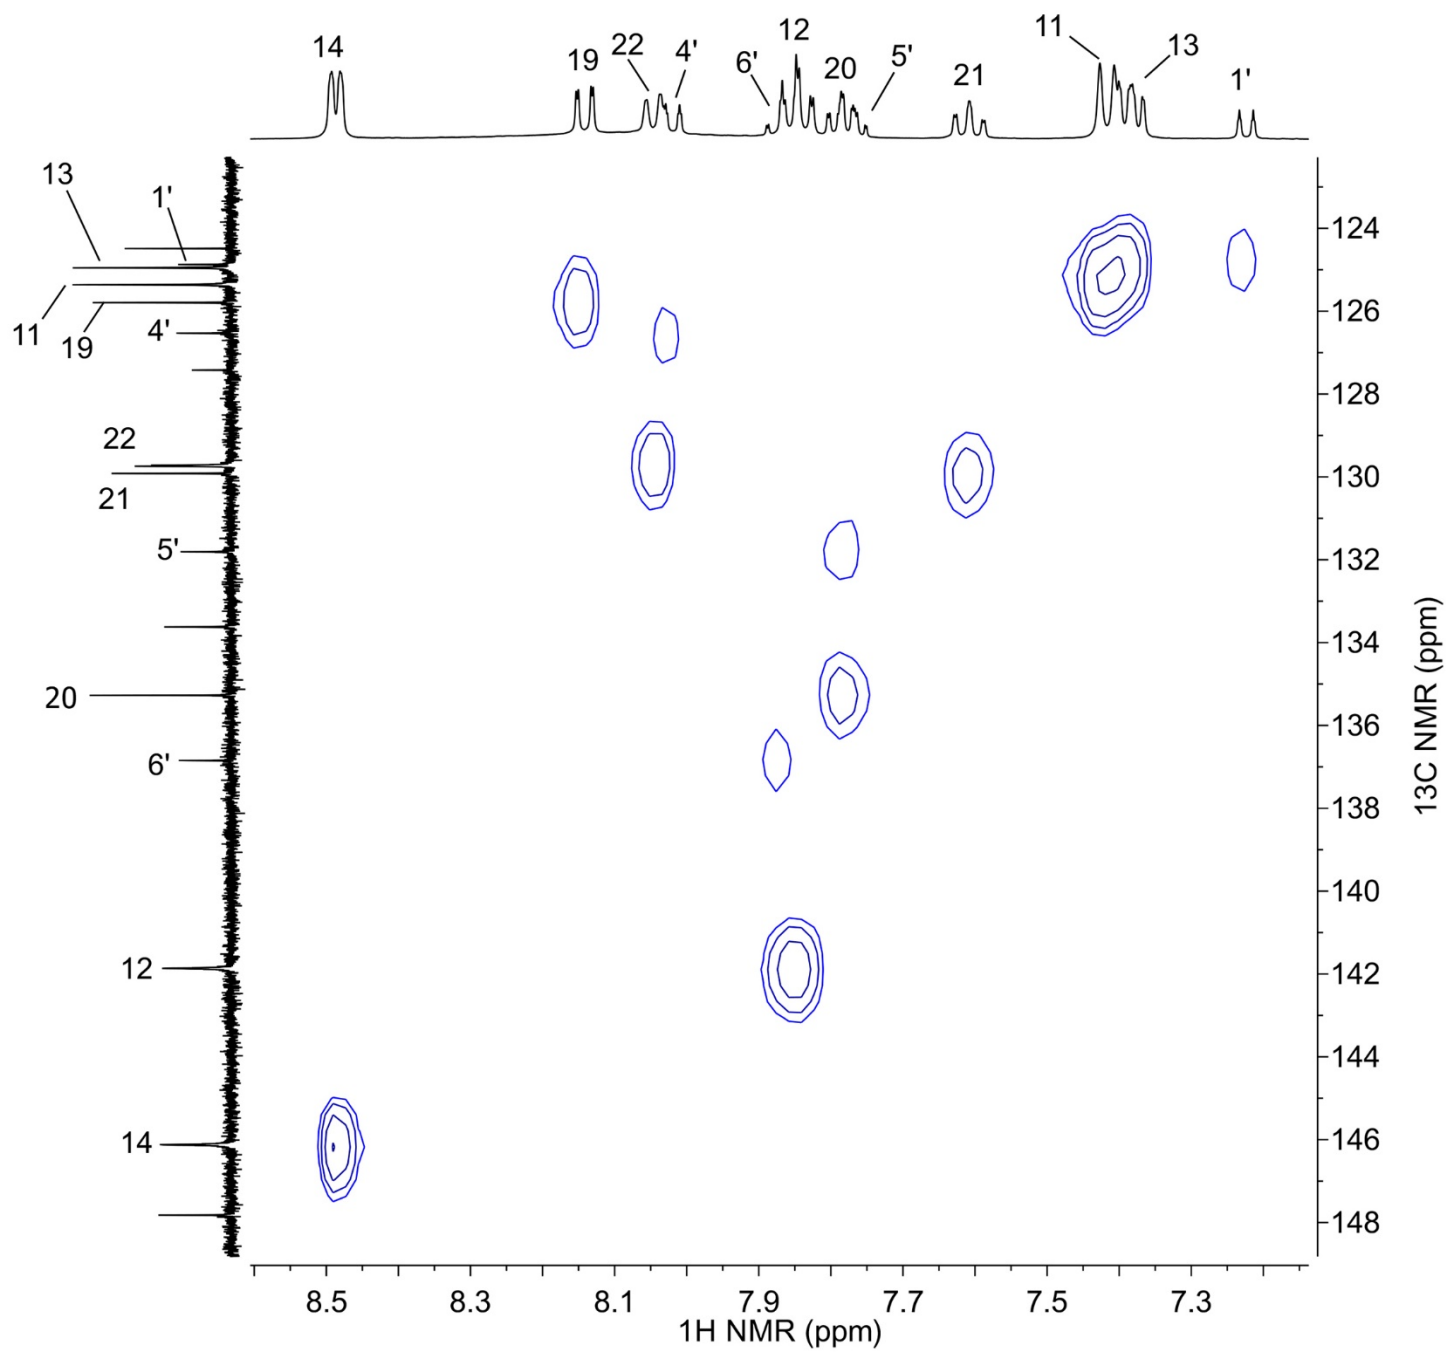

**Figure S71.**  $^1\text{H}$ - $^{13}\text{C}$  HSQC spectrum of **1** from 7.2 to 8.6 ppm ( $^1\text{H}$ ) and 123 to 148 ppm ( $^{13}\text{C}$ ).

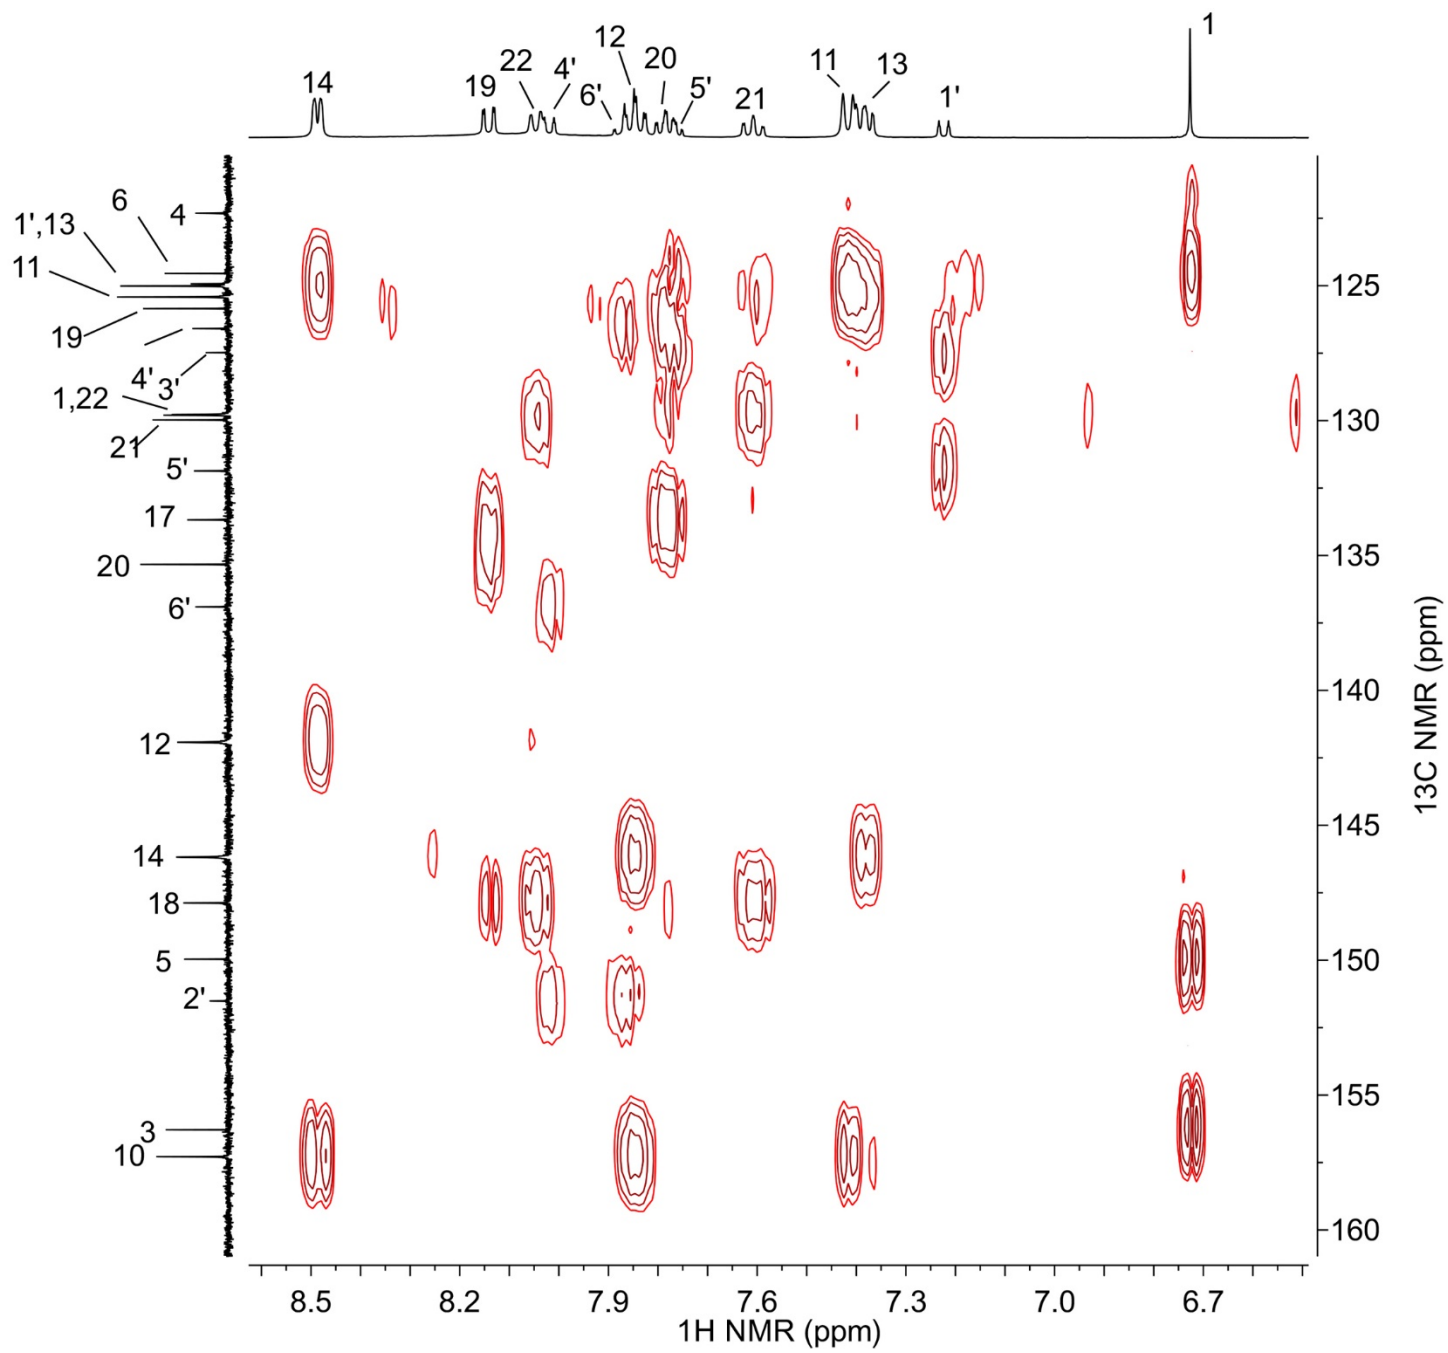

**Figure S72.**  $^1\text{H}$ - $^{13}\text{C}$  HMBC spectrum of **1** from 6.5 to 8.6 ppm ( $^1\text{H}$ ) and 120 to 160 ppm ( $^{13}\text{C}$ ).

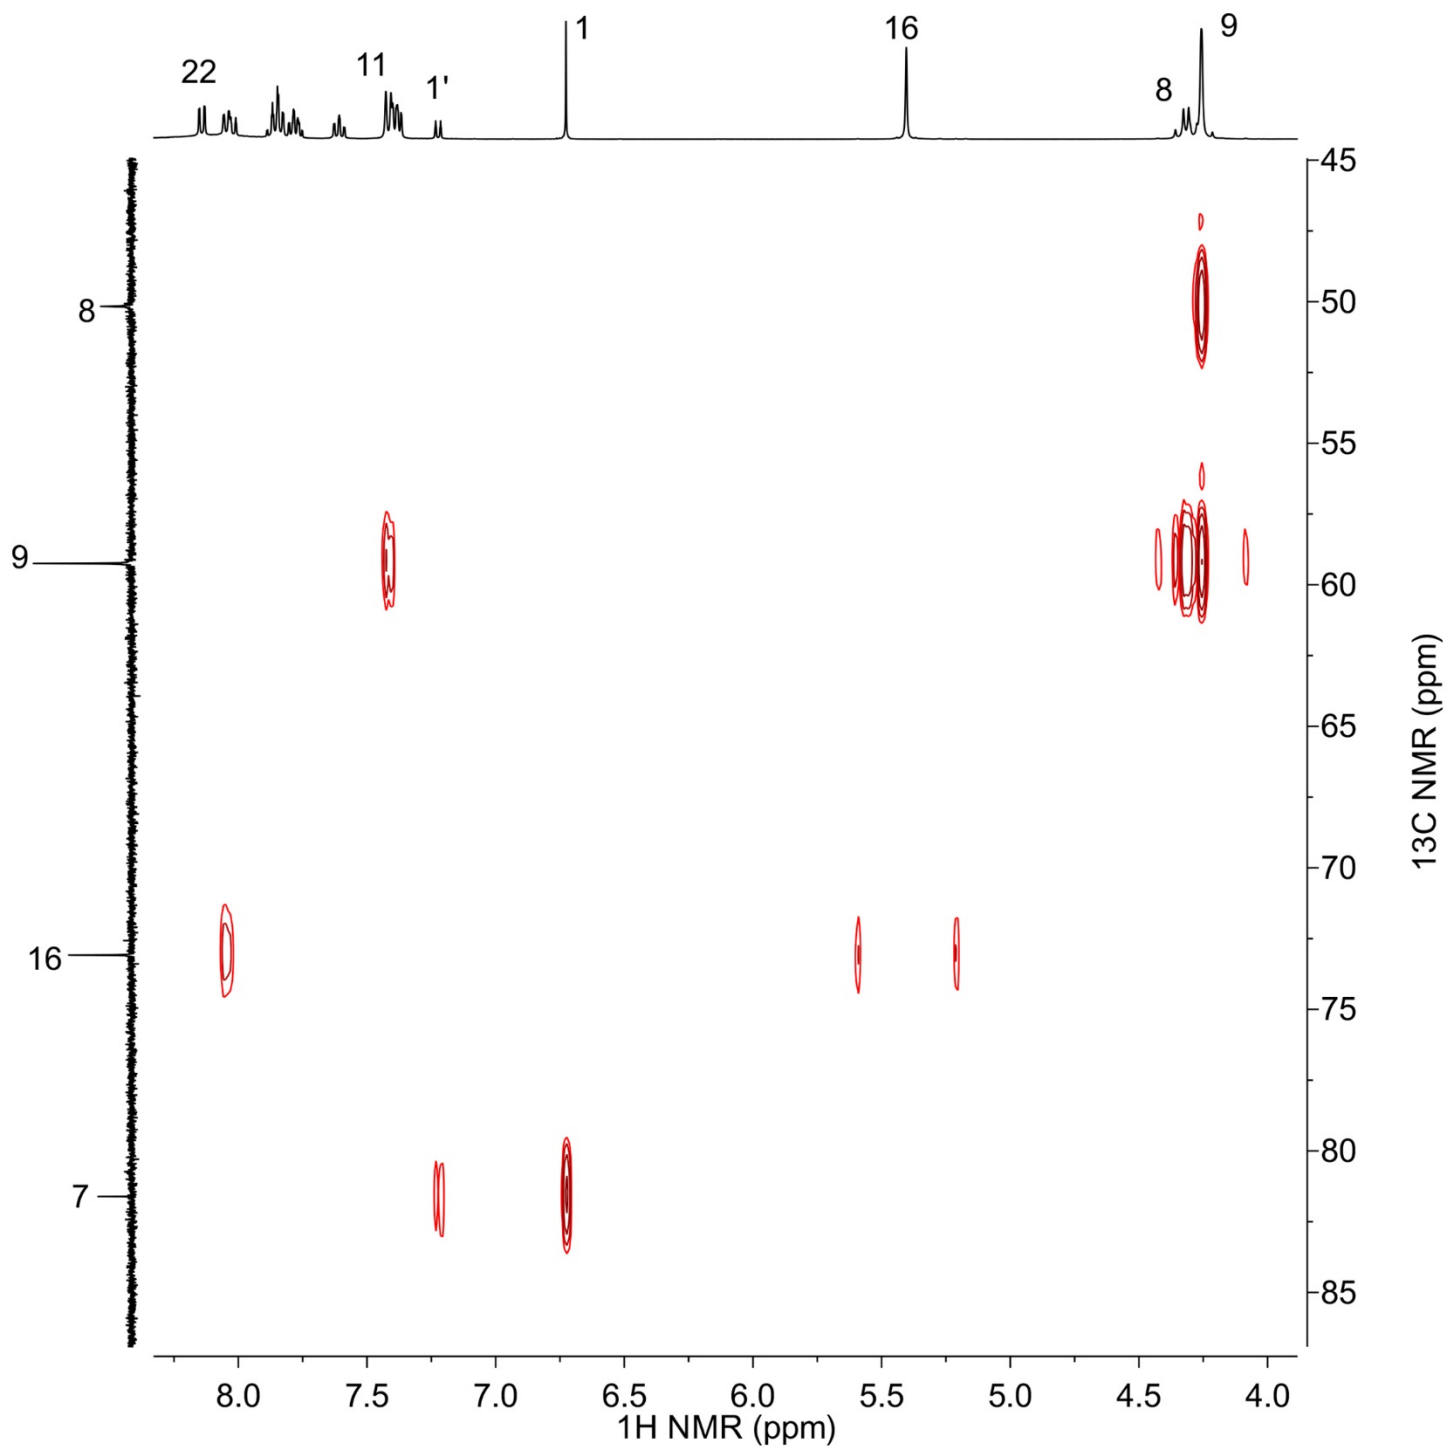

**Figure S73.**  $^1\text{H}$ - $^{13}\text{C}$  HMBC spectrum of **1** from 4.0 to 8.3 ppm ( $^1\text{H}$ ) and 45 to 85 ppm ( $^{13}\text{C}$ ).

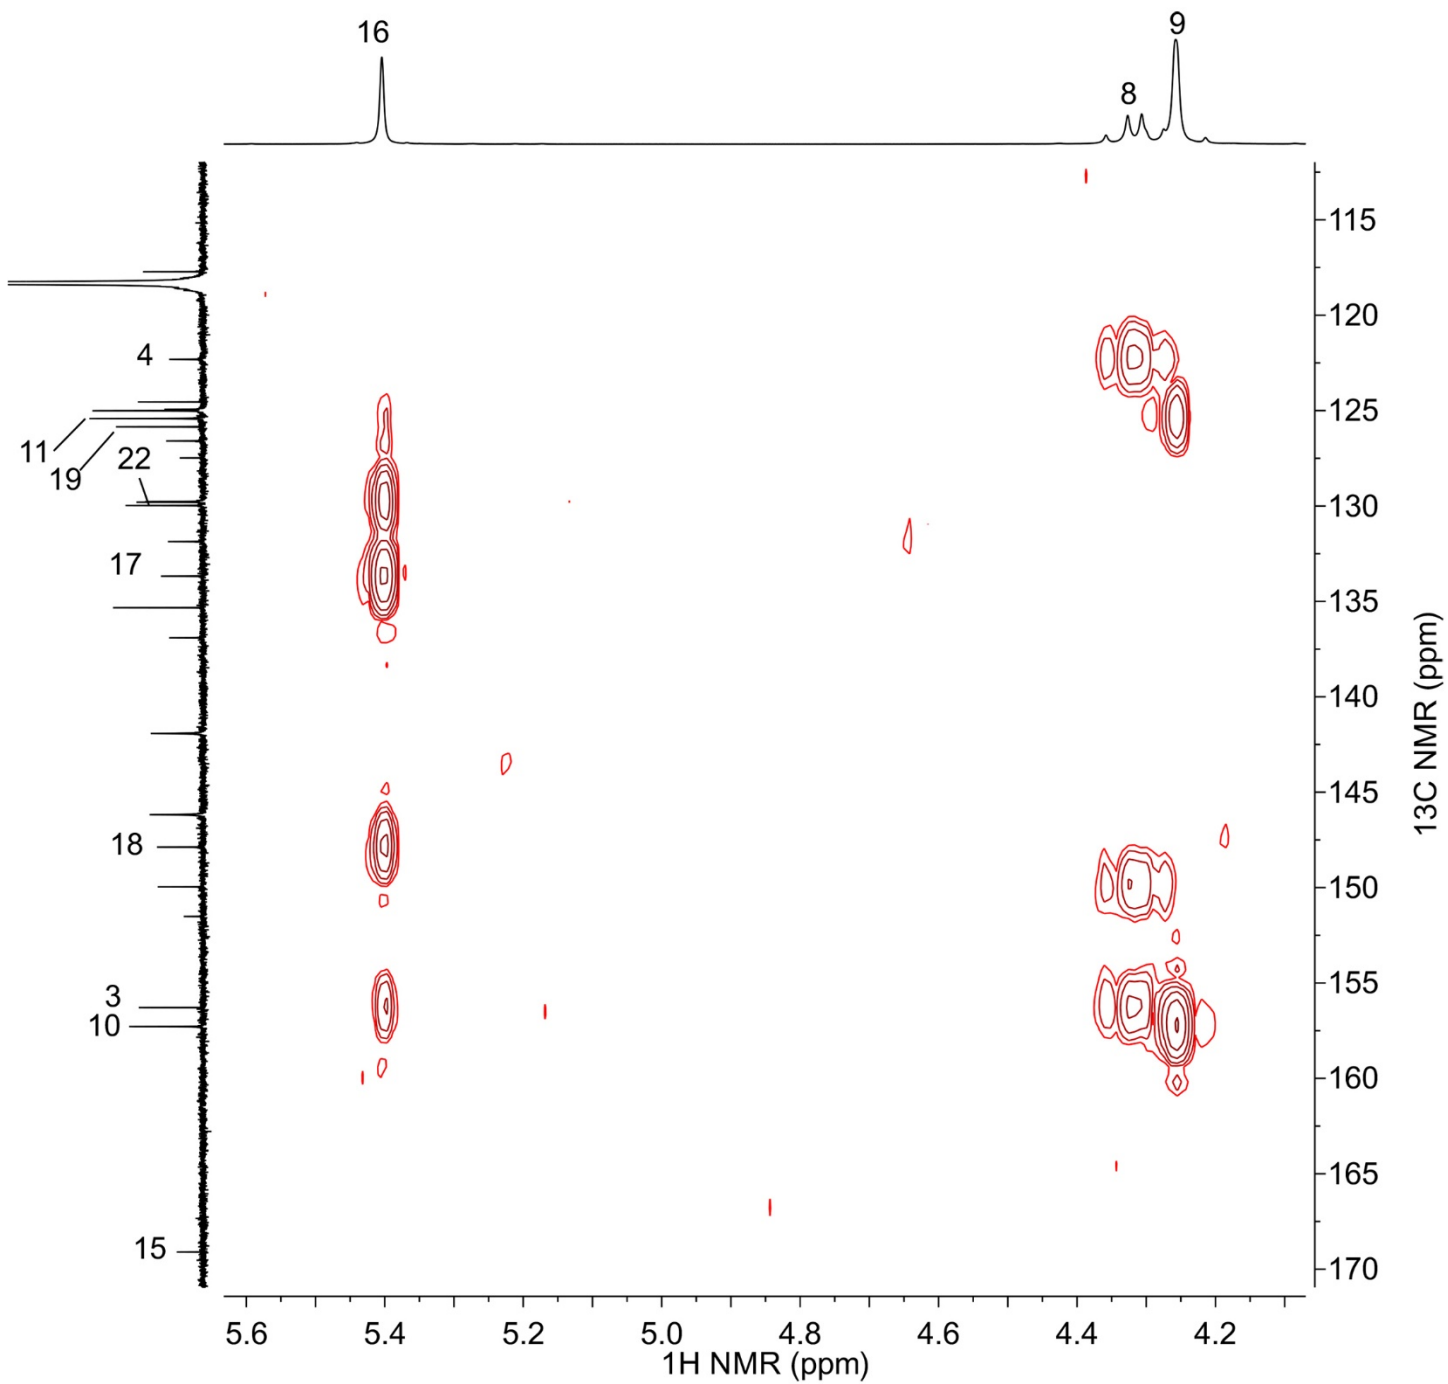

**Figure S74.**  $^1\text{H}$ - $^{13}\text{C}$  HMBC spectrum of **1** from 4.1 to 5.6 ppm ( $^1\text{H}$ ) and 110 to 170 ppm ( $^{13}\text{C}$ ).



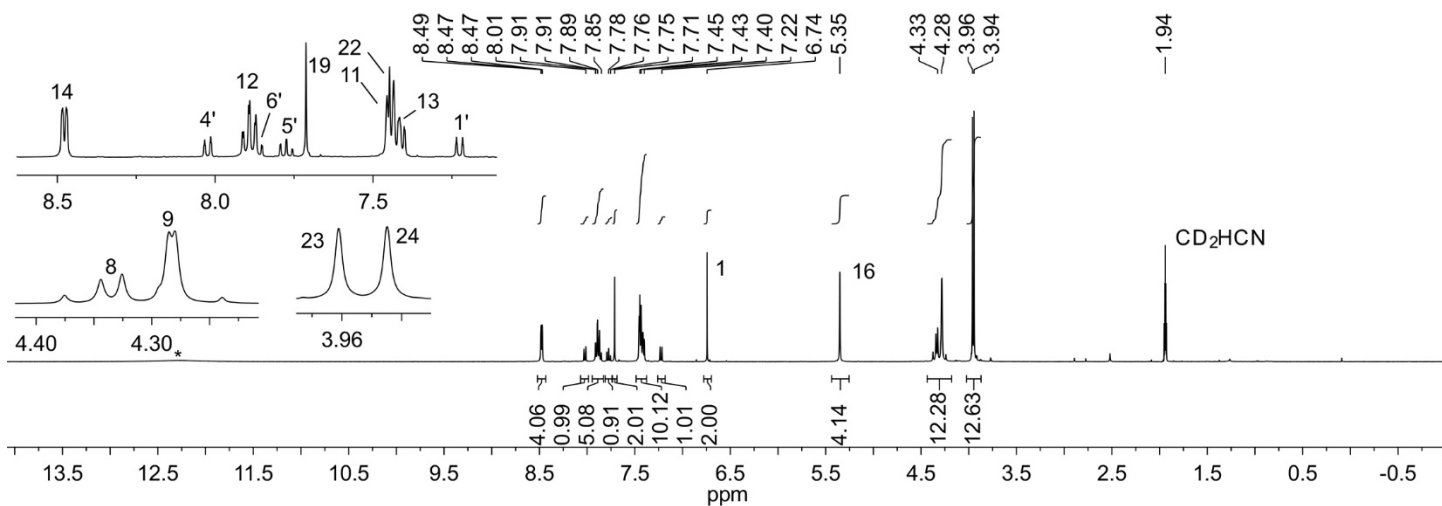

Figure S75.  $^1\text{H}$  NMR spectrum of **2**.

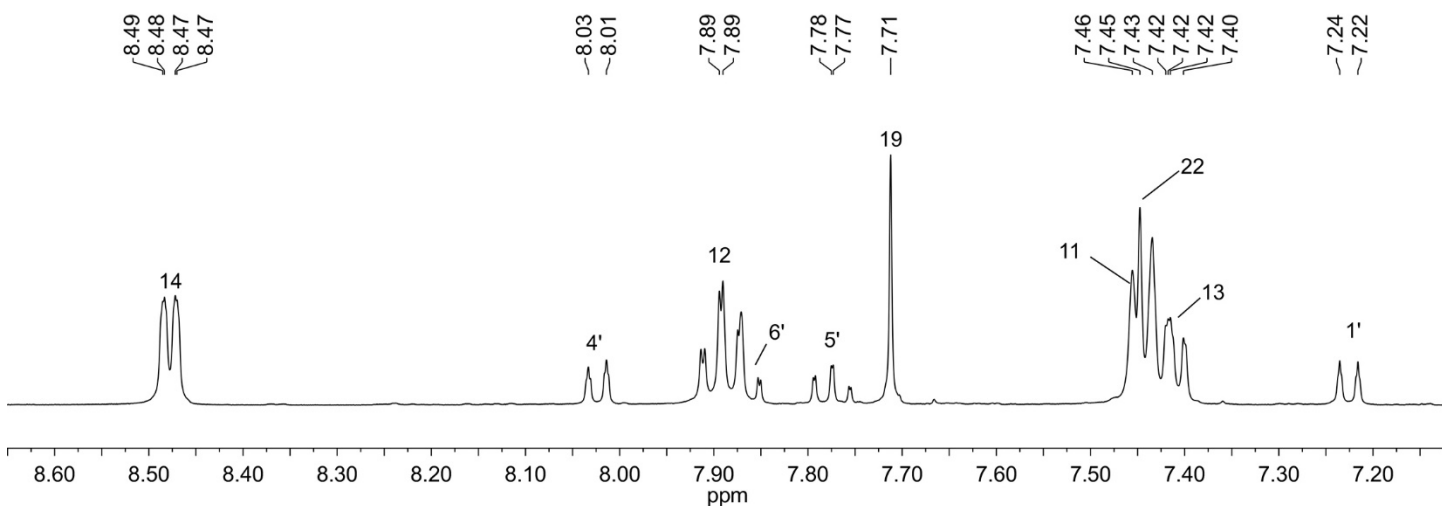

Figure S76. Expansion of  $^1\text{H}$  NMR spectrum of **2**.

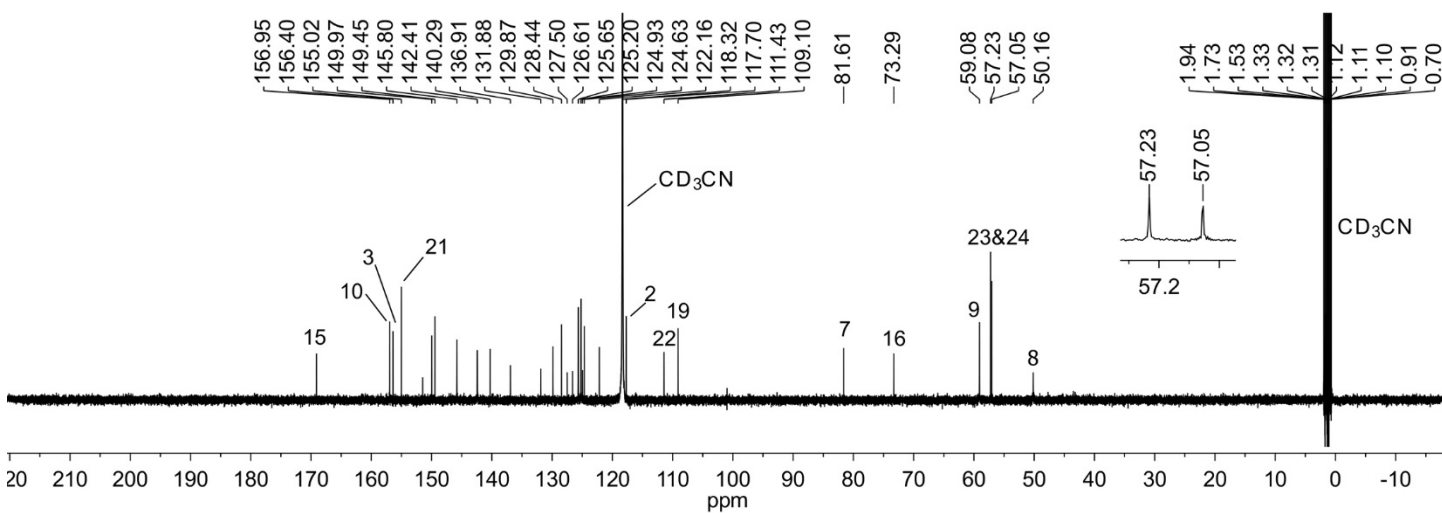

Figure S77.  $^{13}\text{C}\{^1\text{H}\}$  NMR spectrum of **2**.

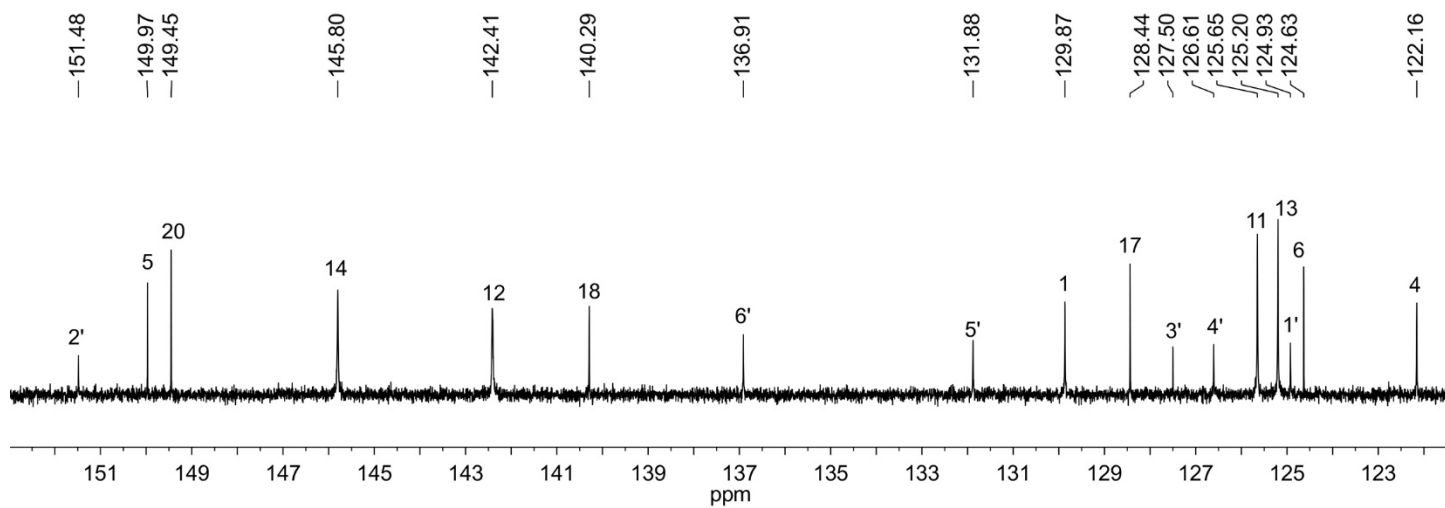

**Figure S78.** Expansion of  $^{13}\text{C}\{^1\text{H}\}$  NMR spectrum of **2**.

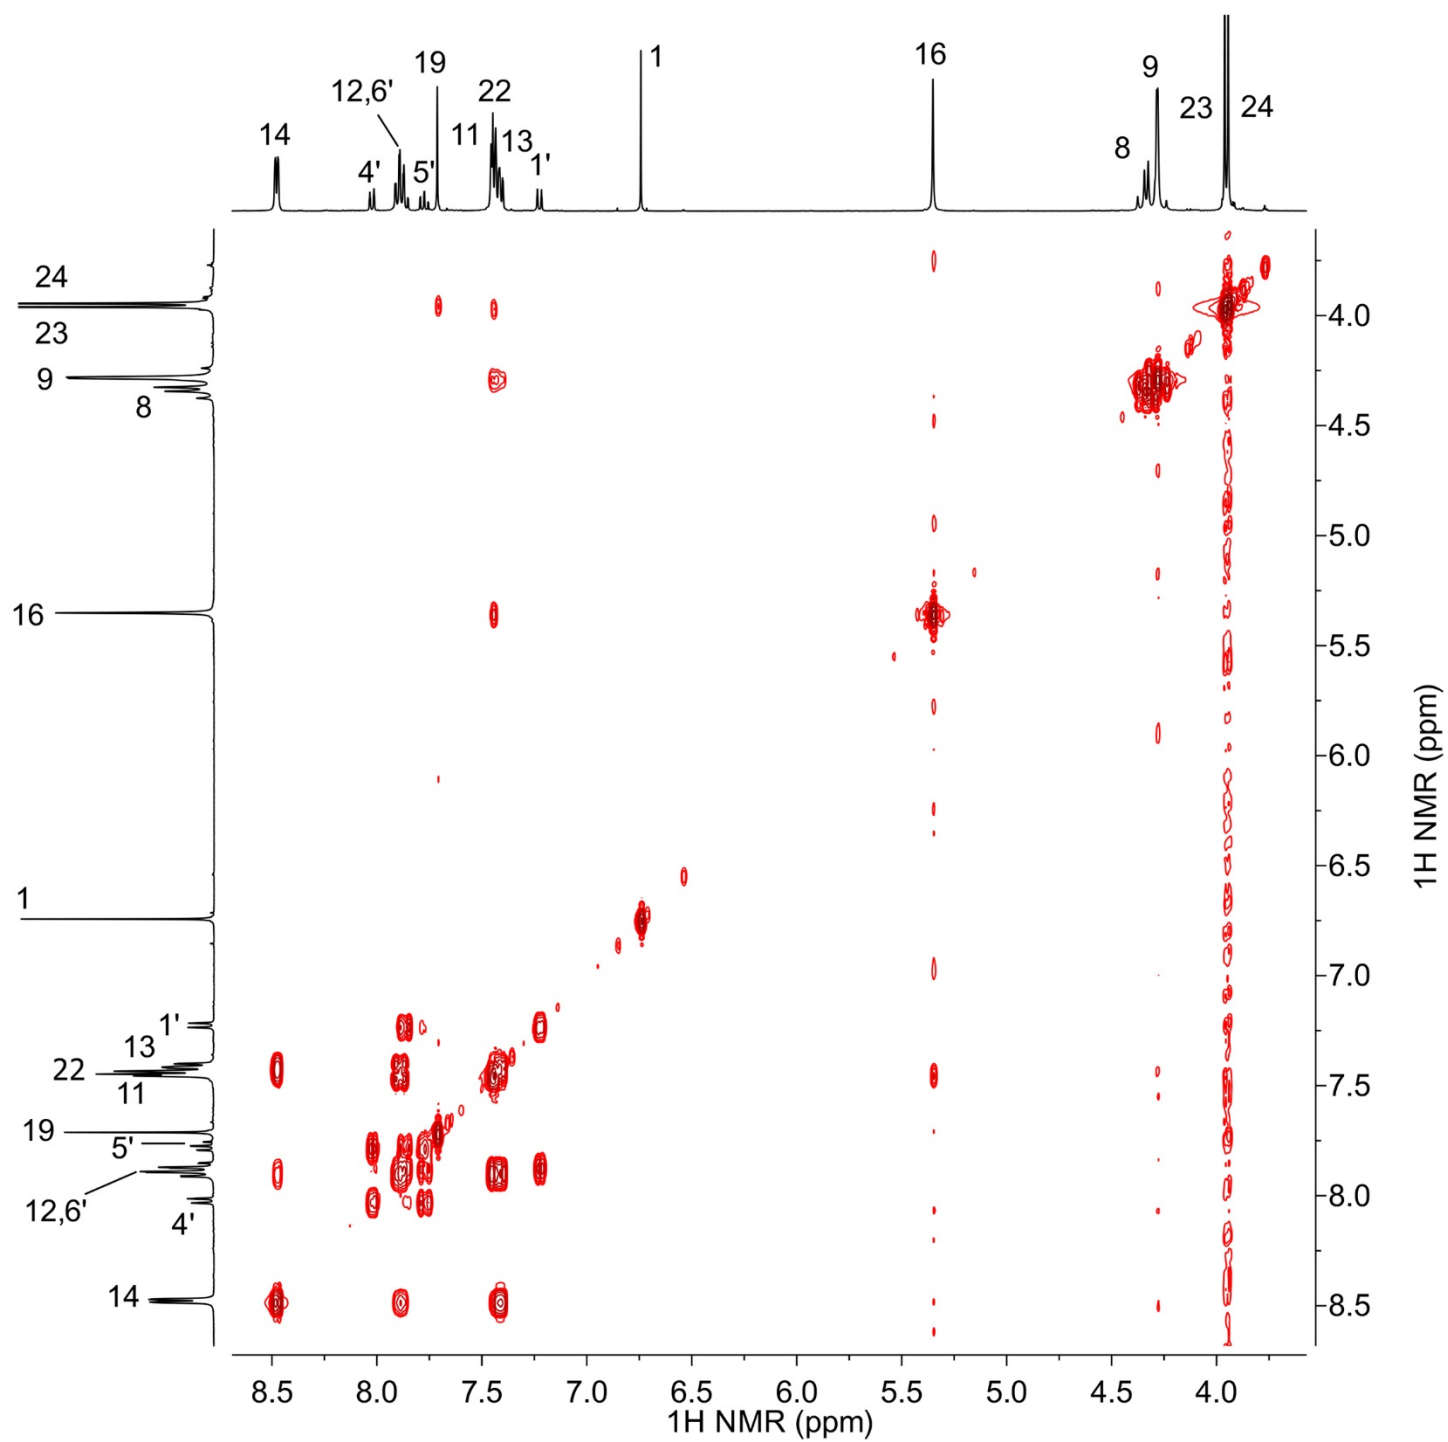

Figure S79.  $^1\text{H}$ - $^1\text{H}$  COSY spectrum of **2**.

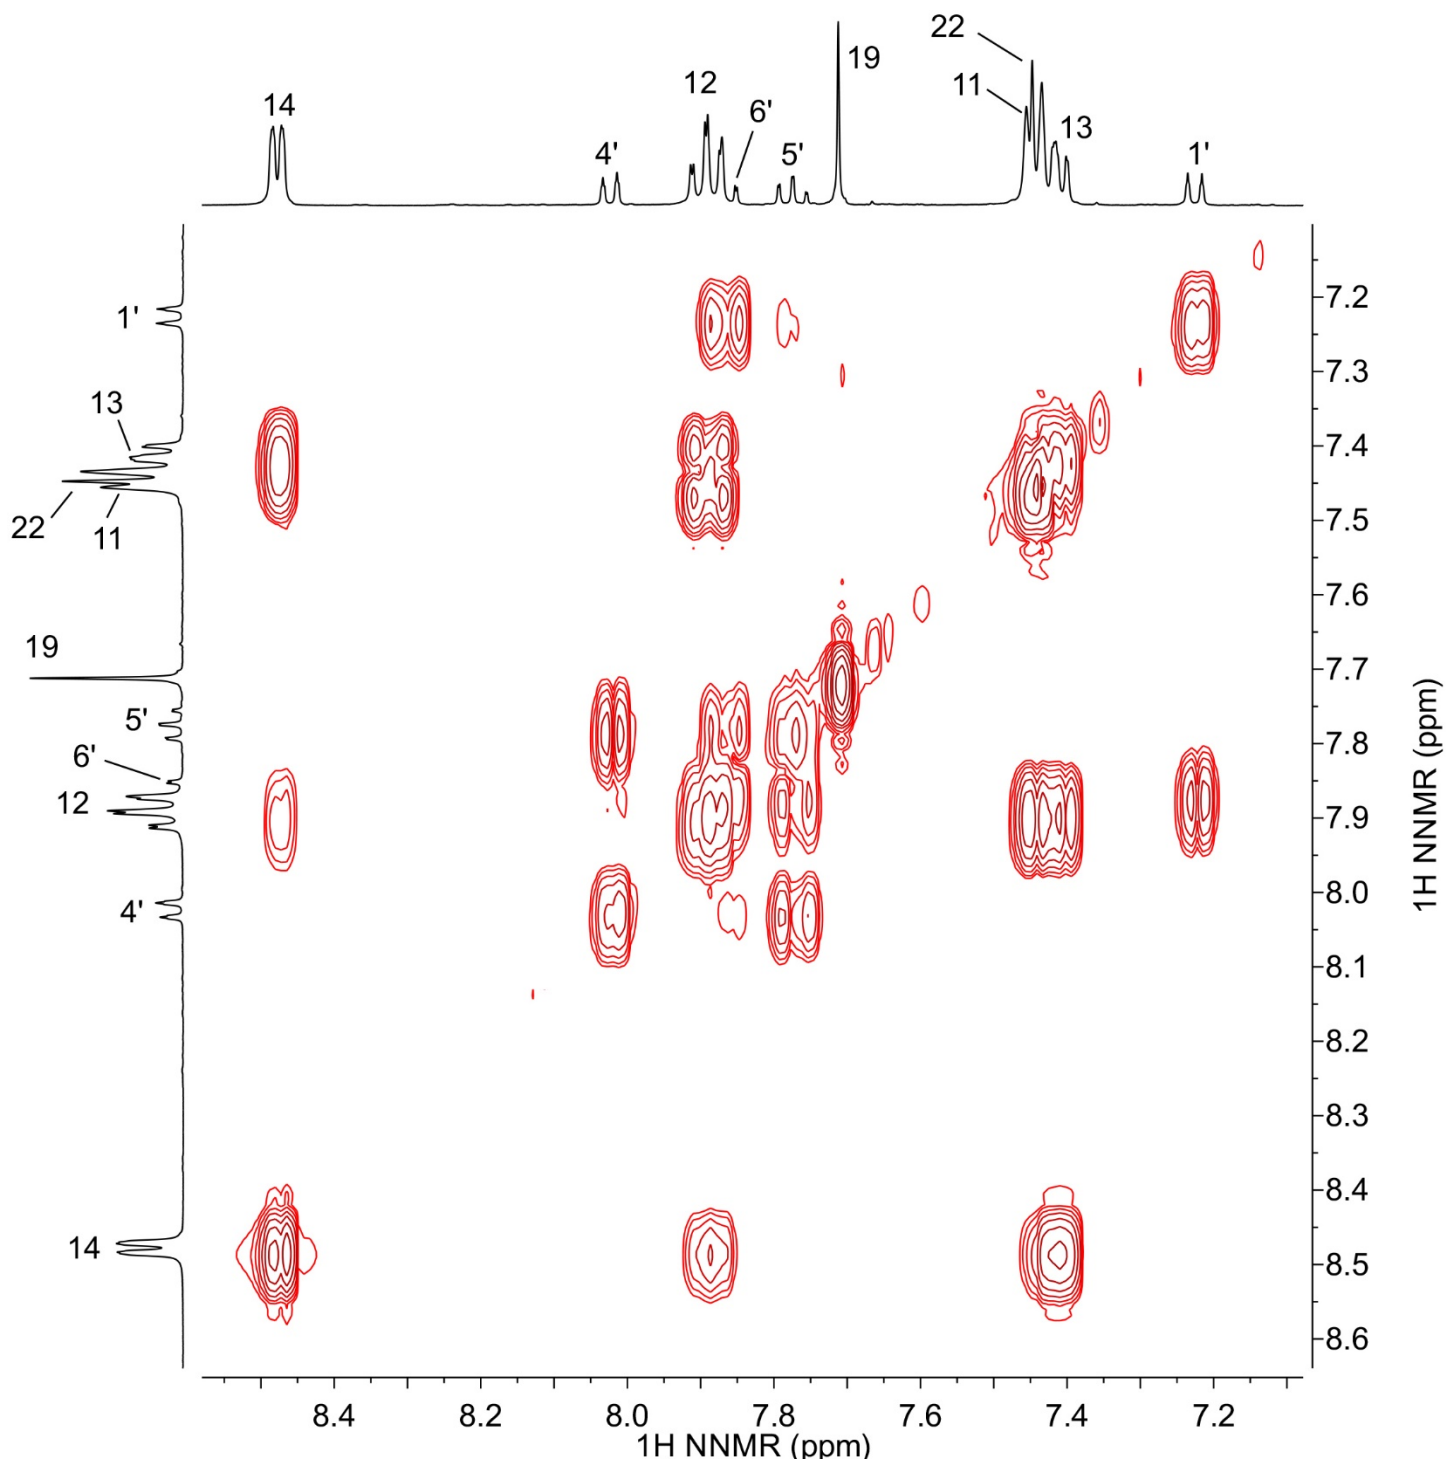

**Figure S80.** Expansion of  $^1\text{H}$ - $^1\text{H}$  COSY spectrum of **2**.

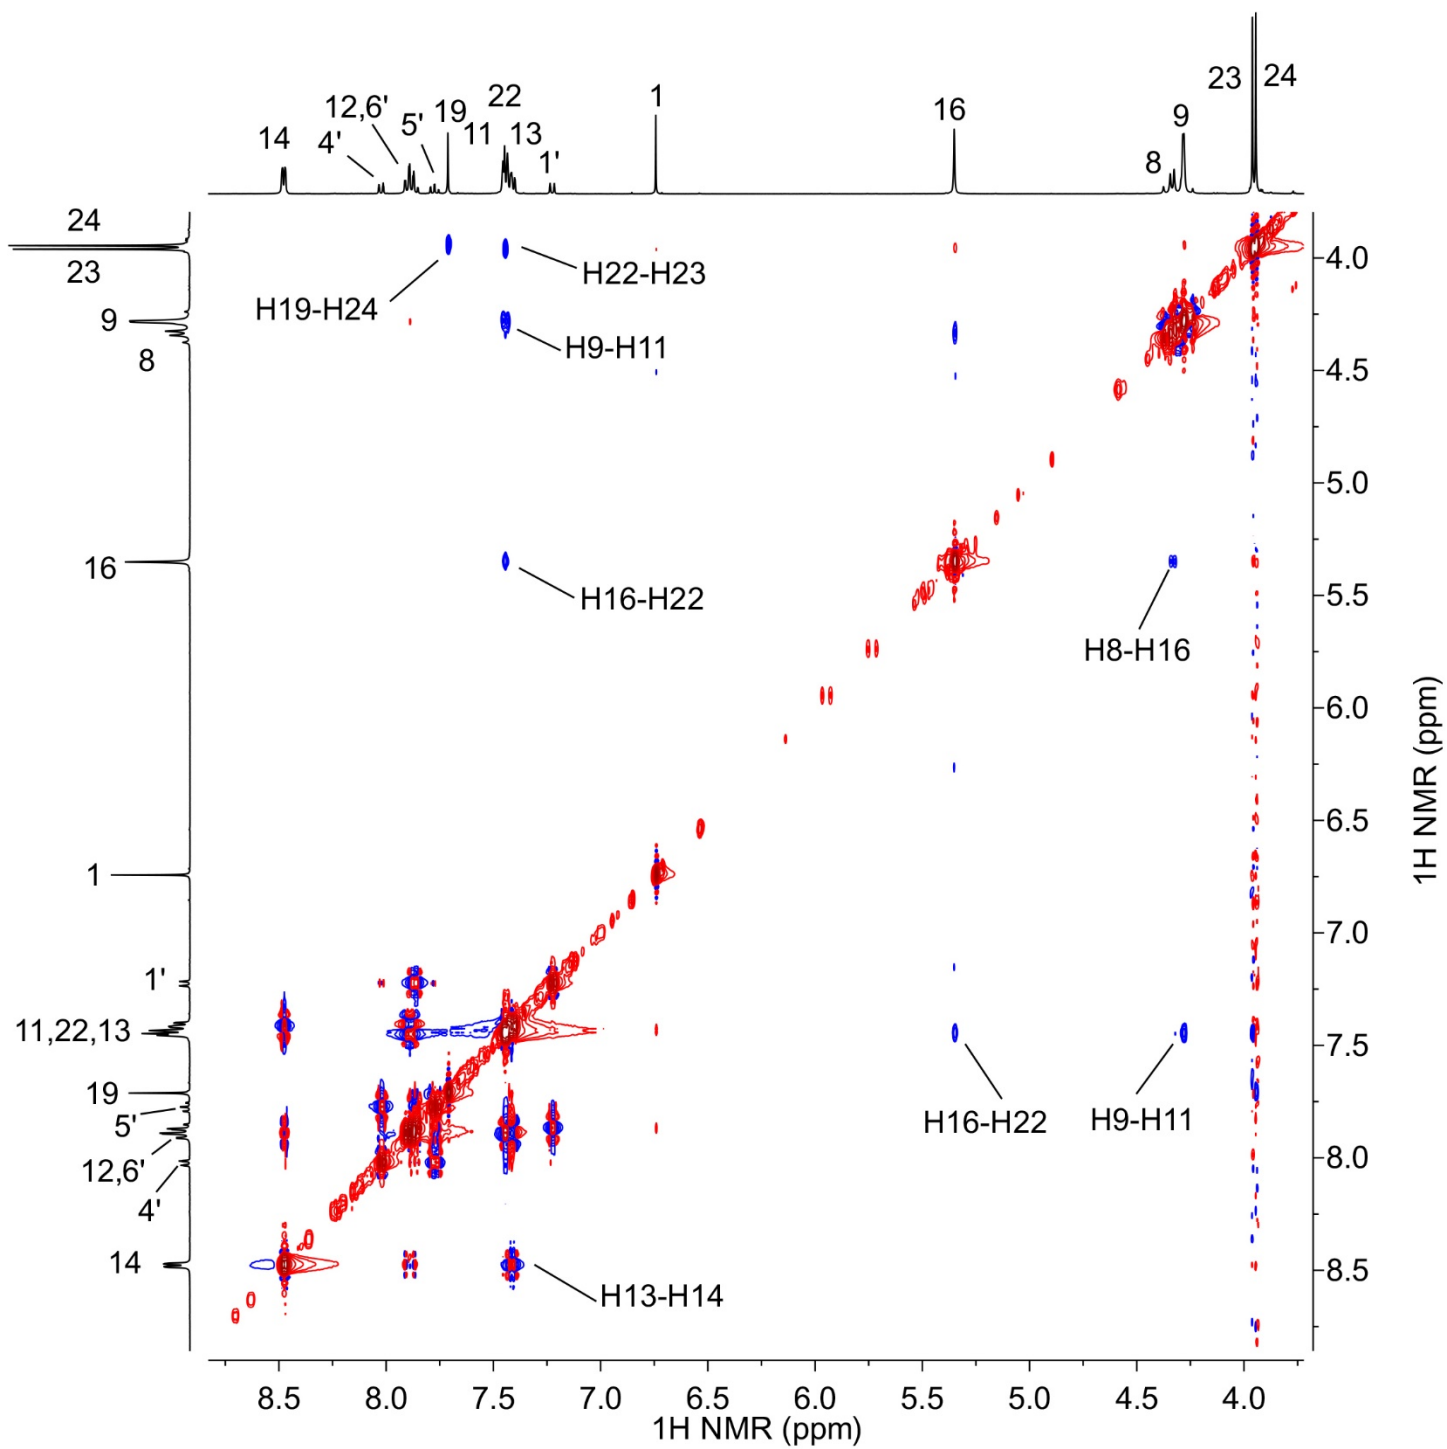

Figure S81.  $^1\text{H}$ - $^1\text{H}$  NOESY spectrum of **2**.

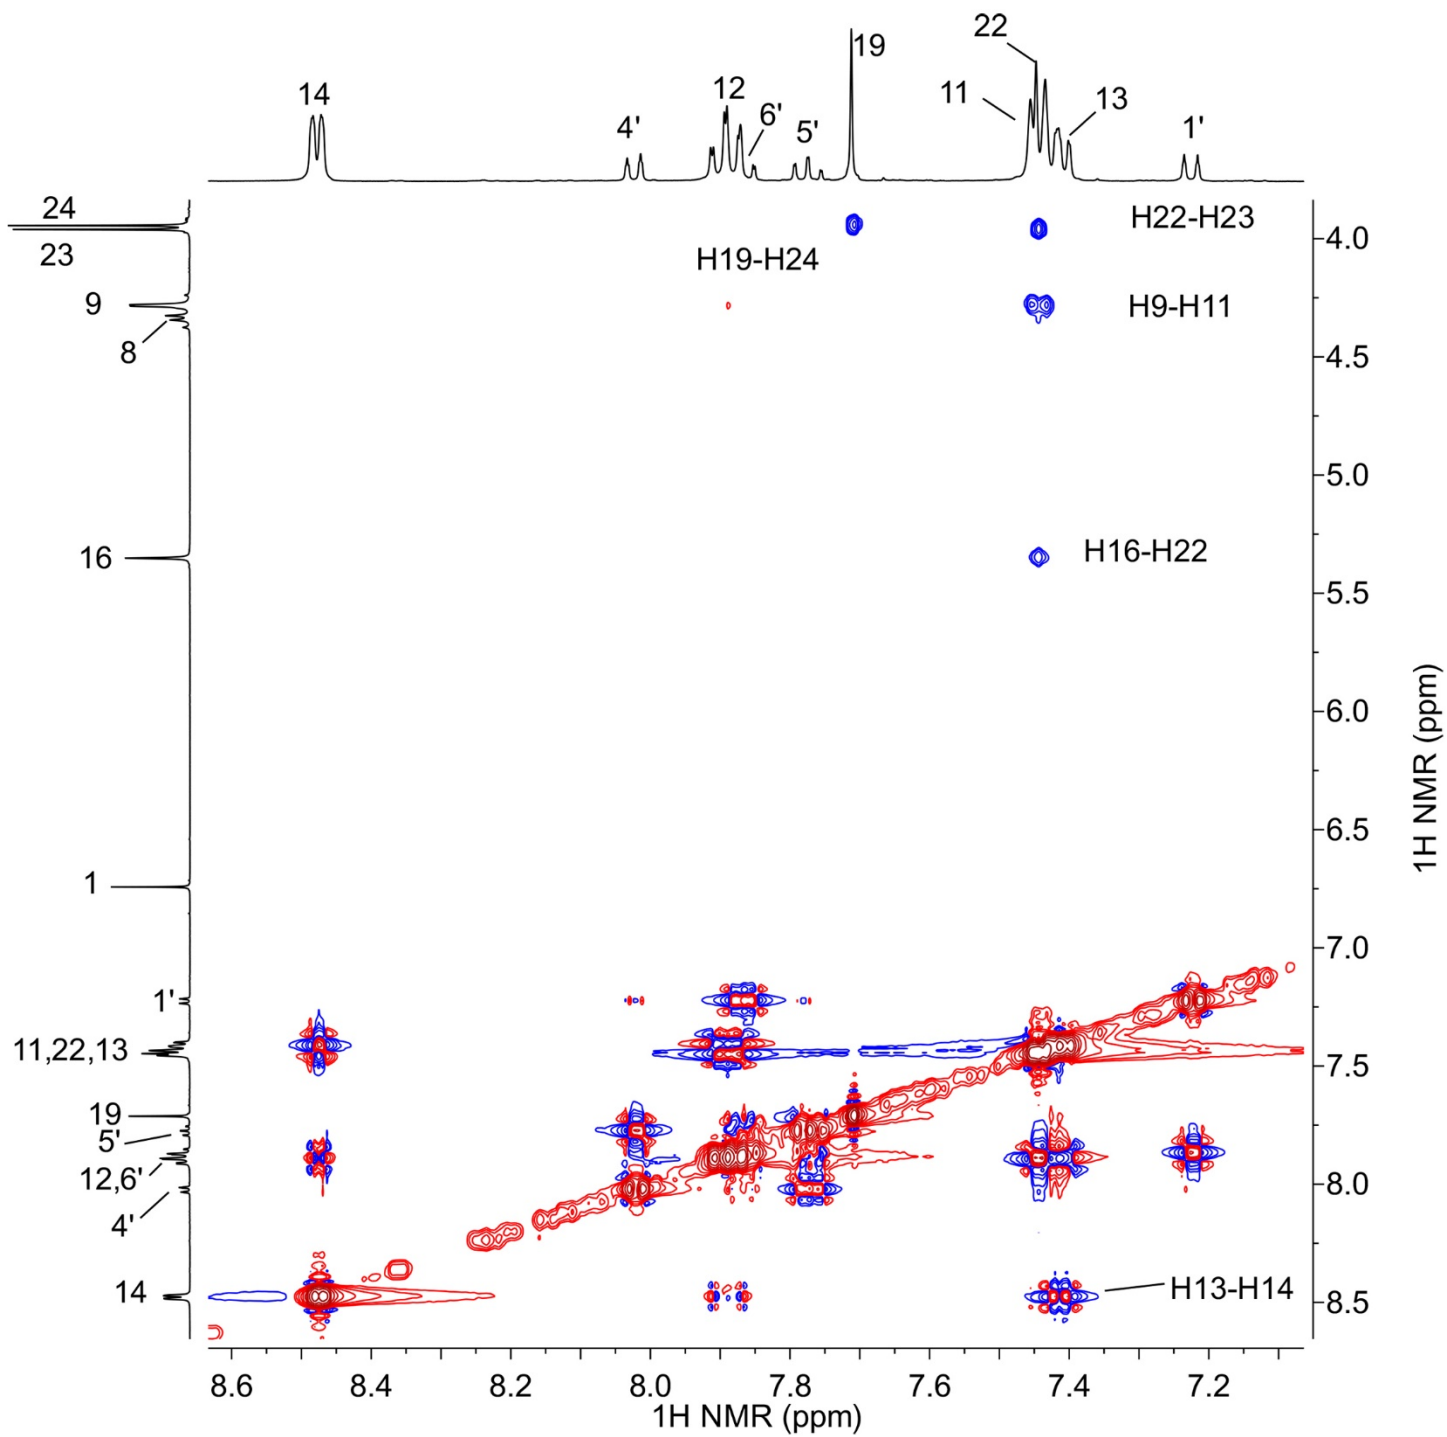

**Figure S82.** Expansion of  $^1\text{H}$ - $^1\text{H}$  NOESY spectrum of **2**.

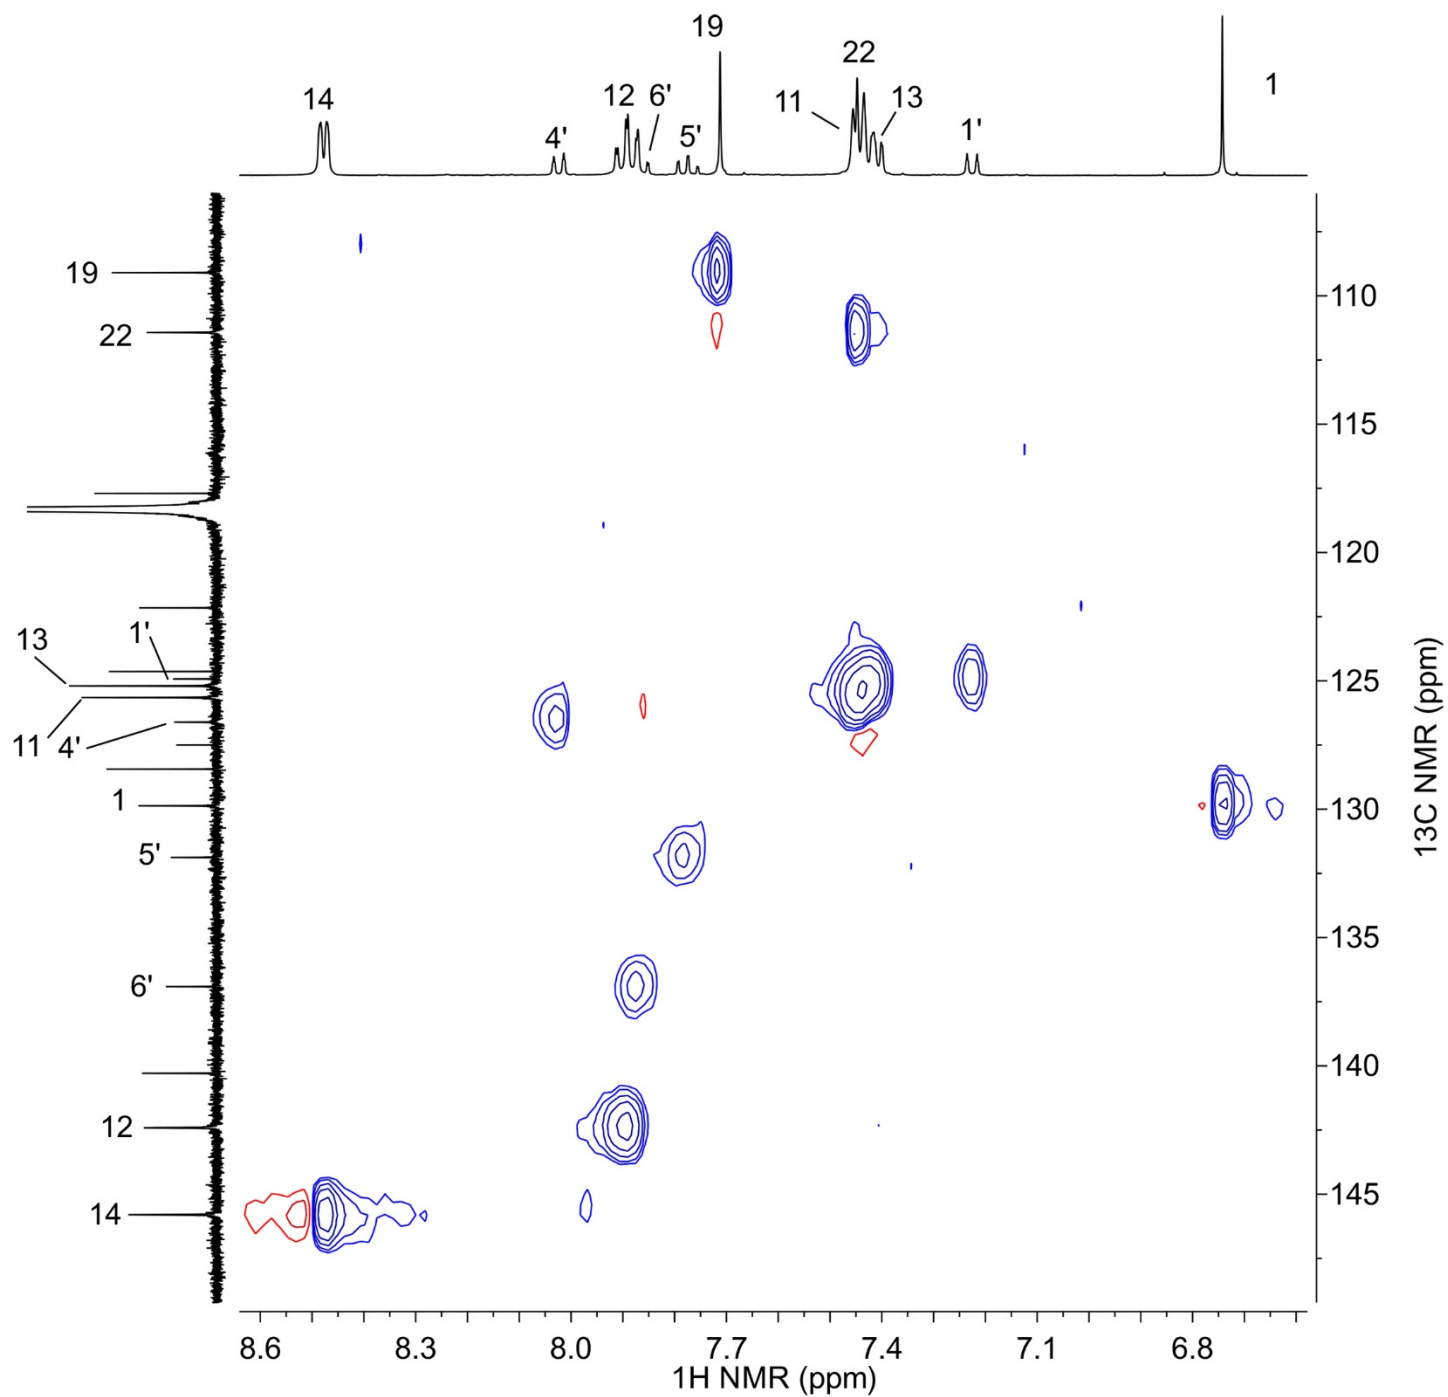

**Figure S83.**  $^1\text{H}$ - $^{13}\text{C}$  HSQC spectrum of **2** from 6.6 to 8.6 ppm ( $^1\text{H}$ ) and 100 to 150 ppm ( $^{13}\text{C}$ ).

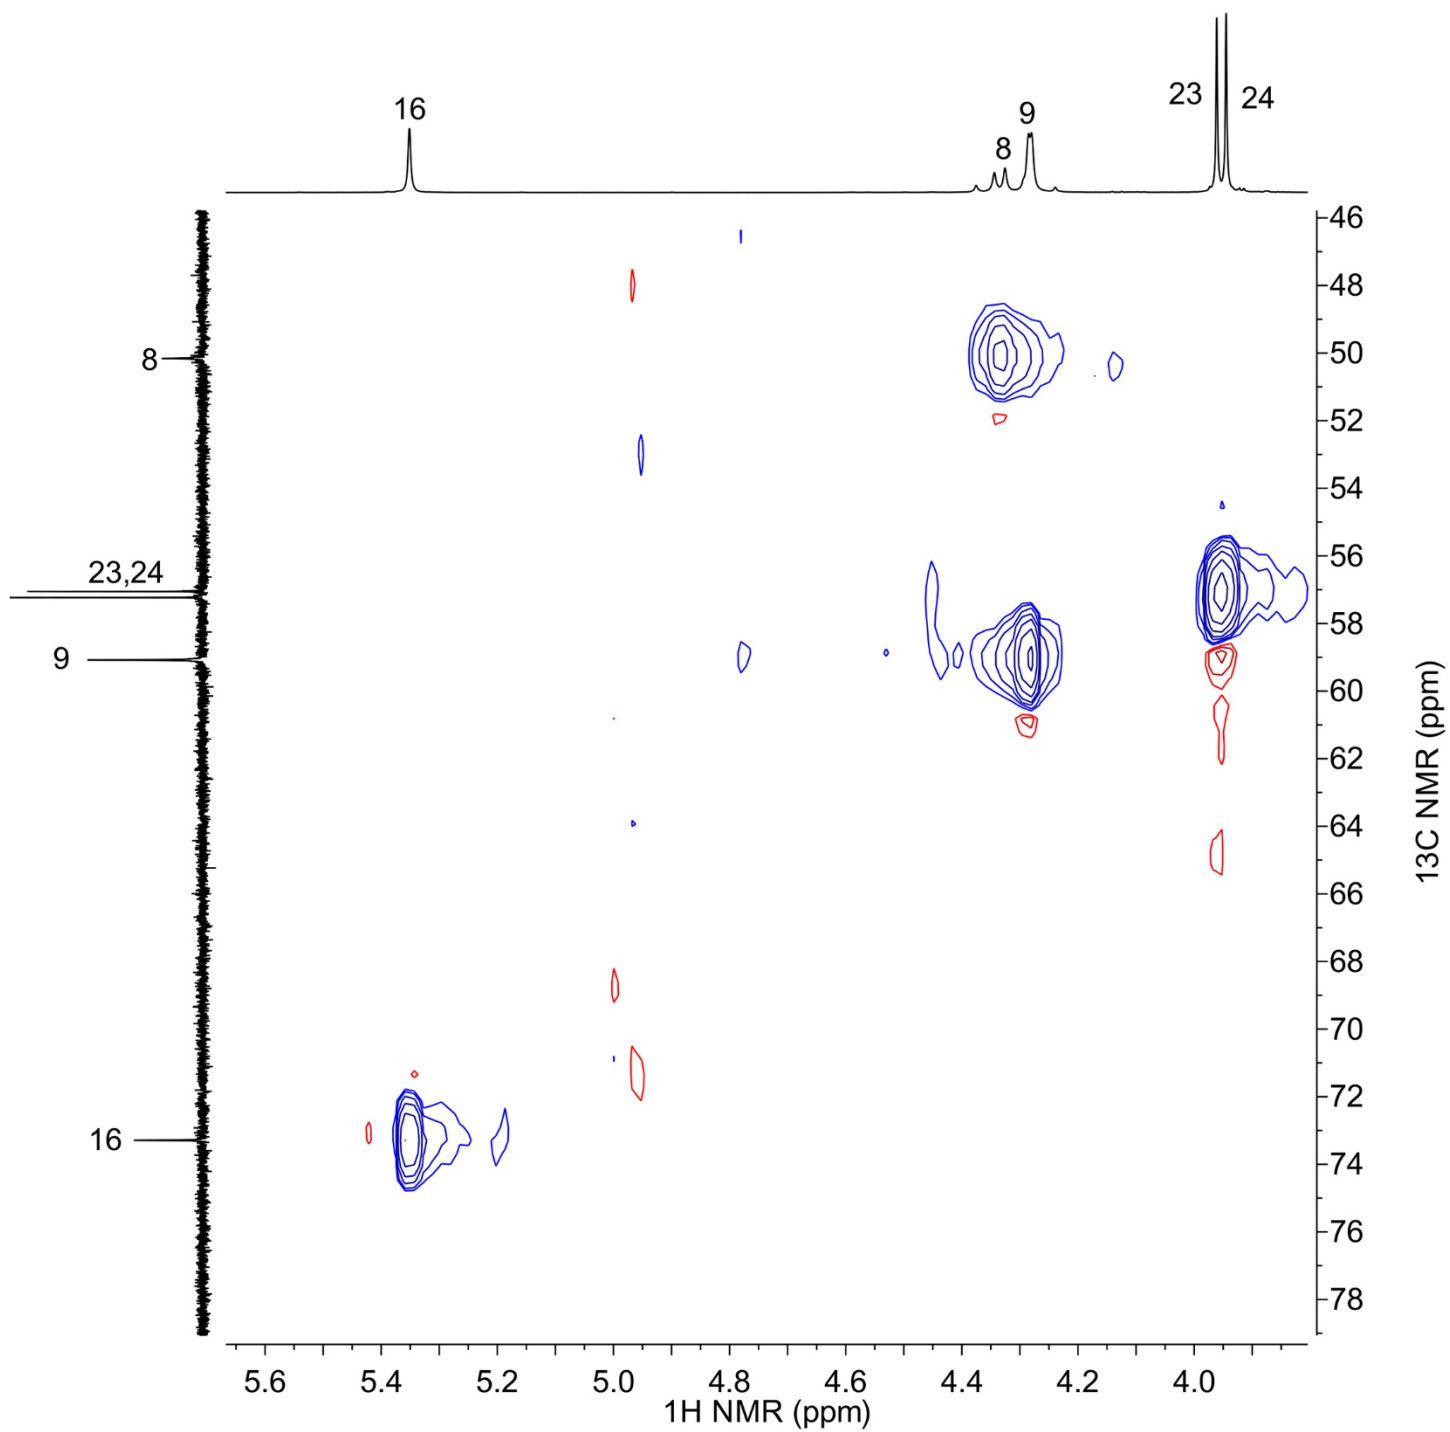

**Figure S84.**  $^1\text{H}$ - $^{13}\text{C}$  HSQC spectrum of **2** from 3.8 to 5.7 ppm ( $^1\text{H}$ ) and 46 to 78 ppm ( $^{13}\text{C}$ ).



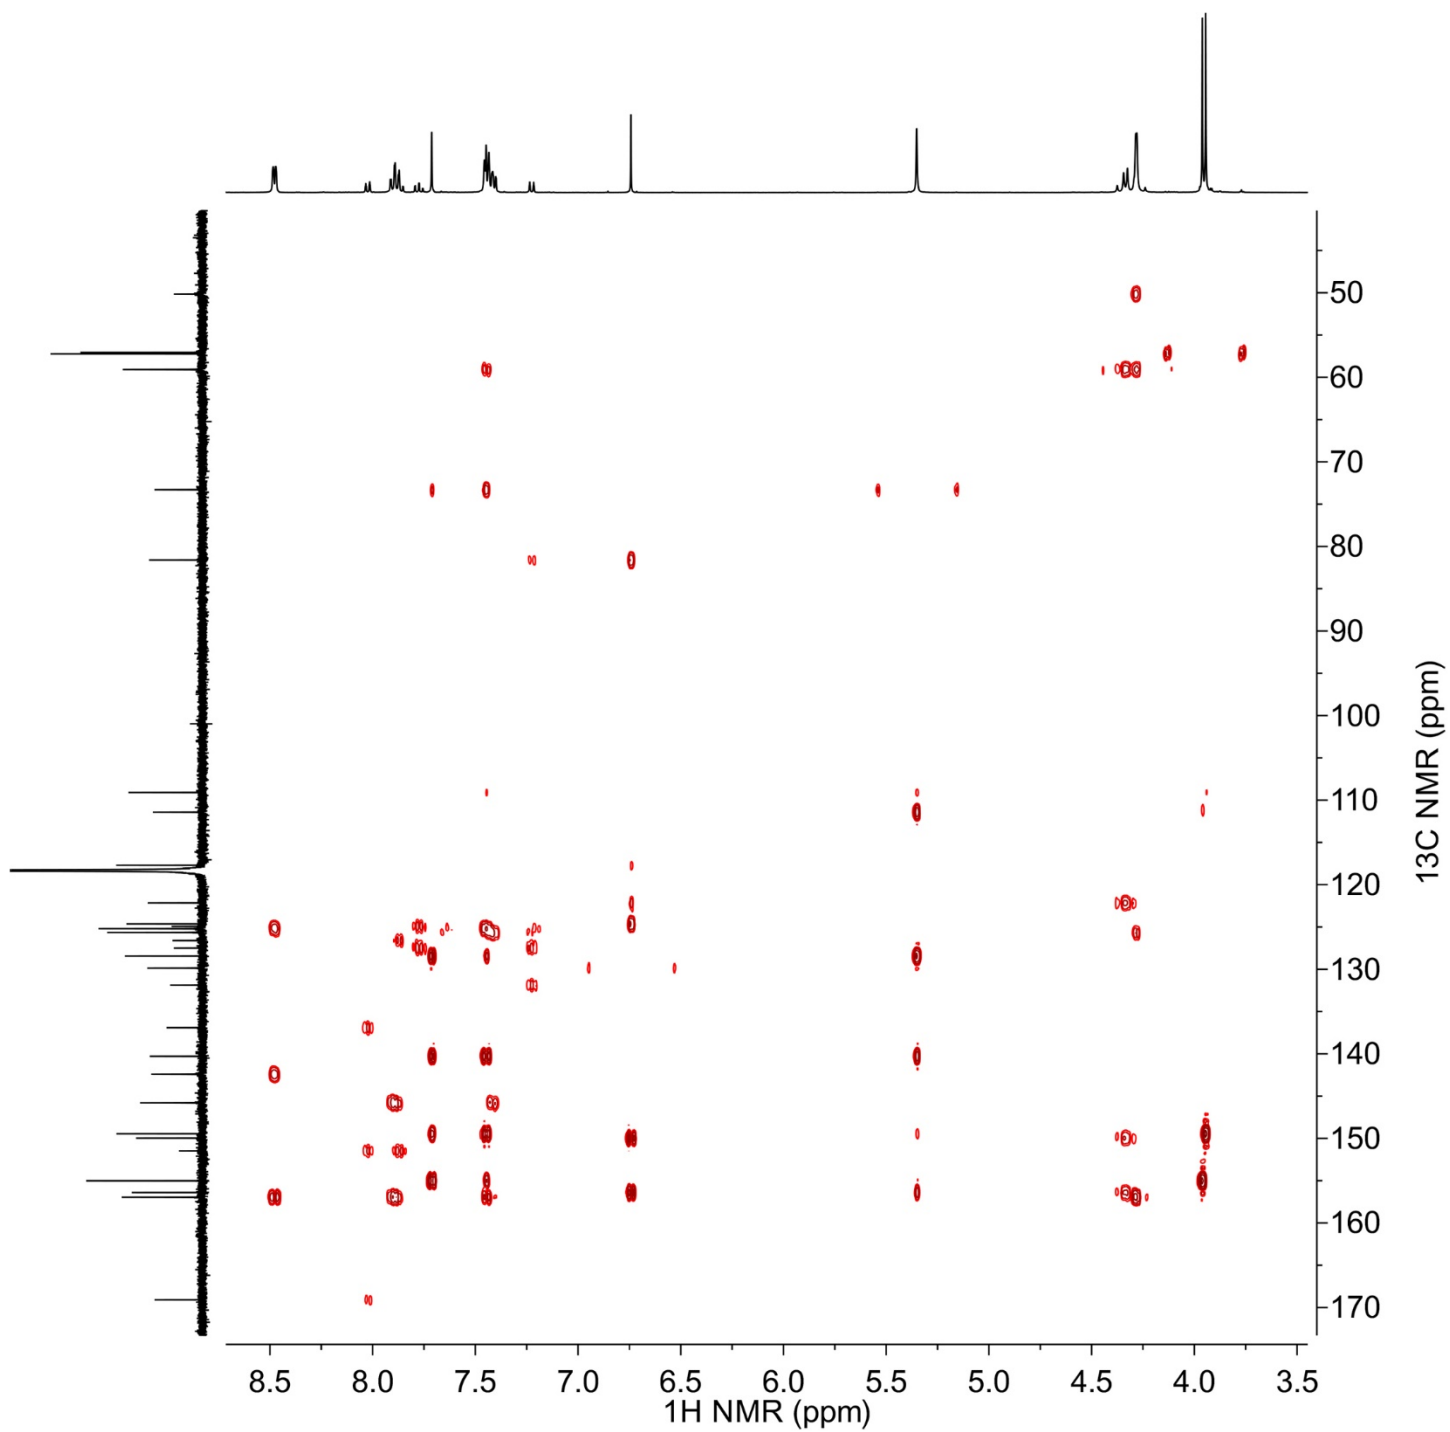

Figure S85.  $^1\text{H}$ - $^{13}\text{C}$  HMBC spectrum of **2**.

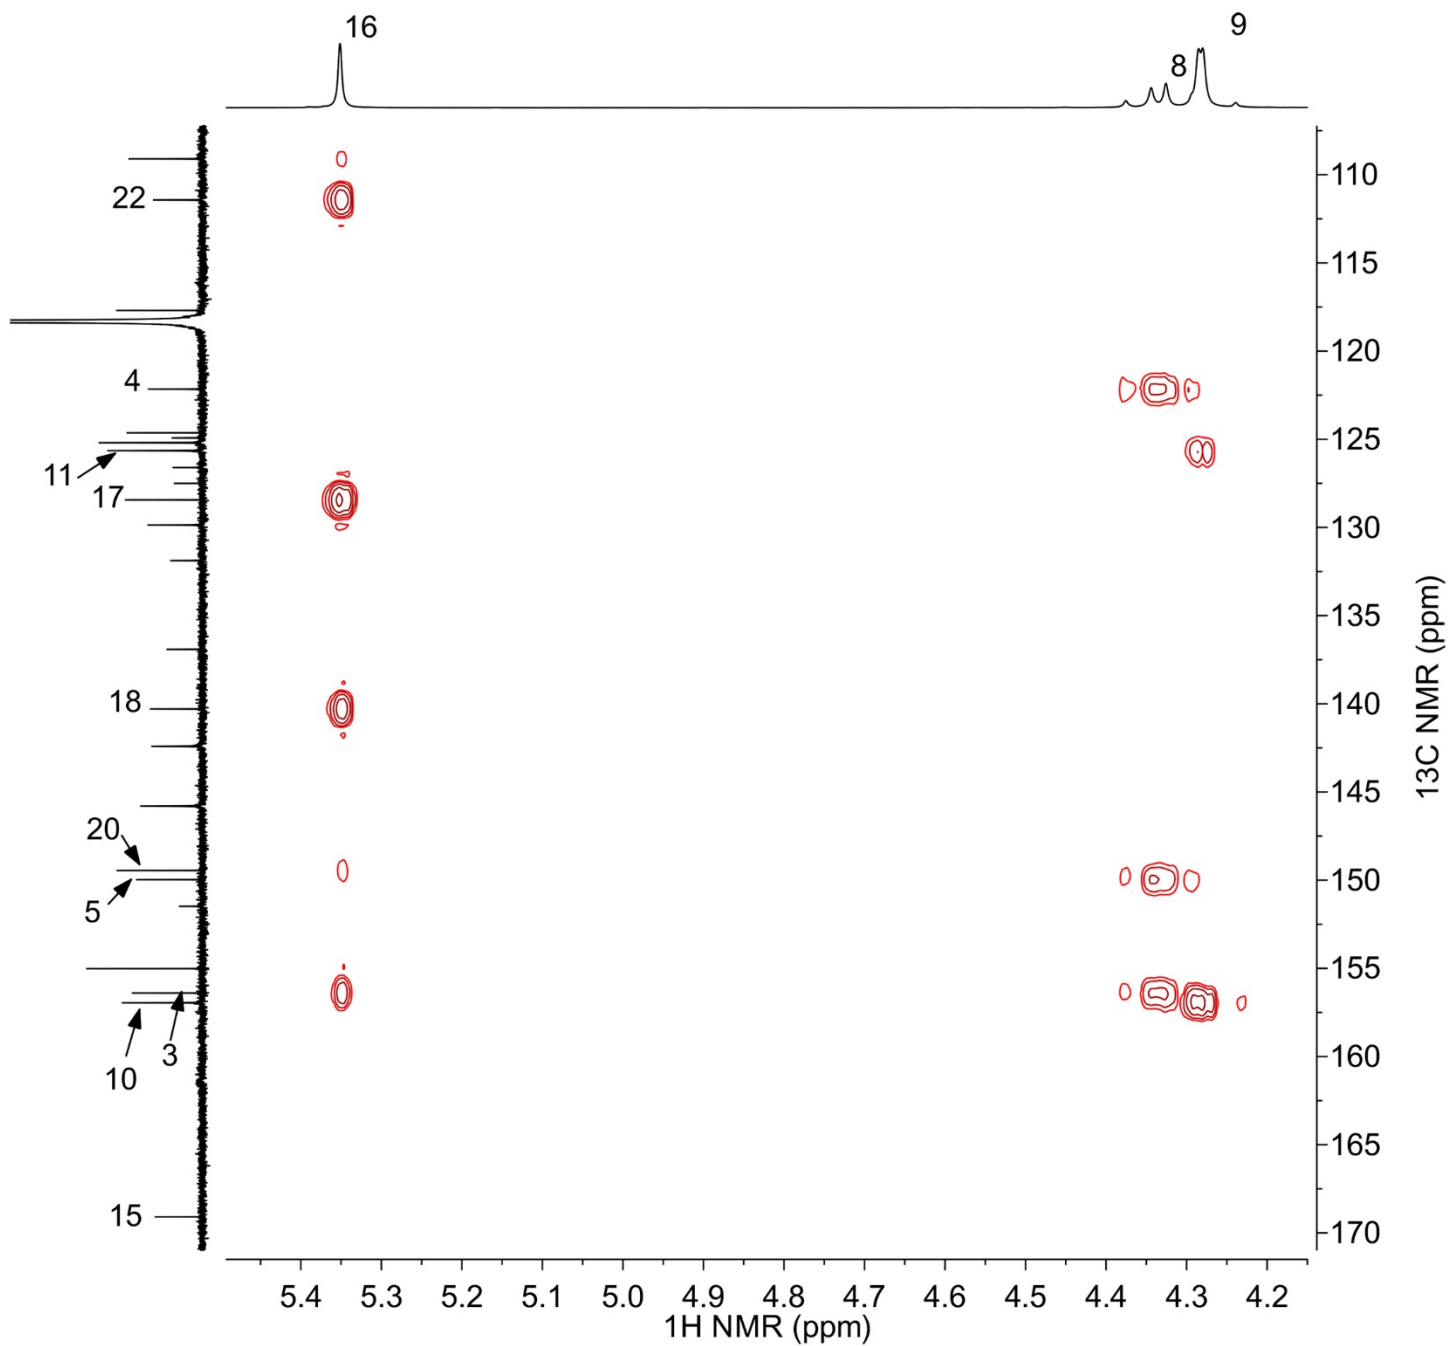

**Figure S86.** Expansion of  $^1\text{H}$ - $^{13}\text{C}$  HMBC spectrum of **2** from 4.2 to 5.5 ppm ( $^1\text{H}$ ) and 105 to 170 ppm ( $^{13}\text{C}$ ).

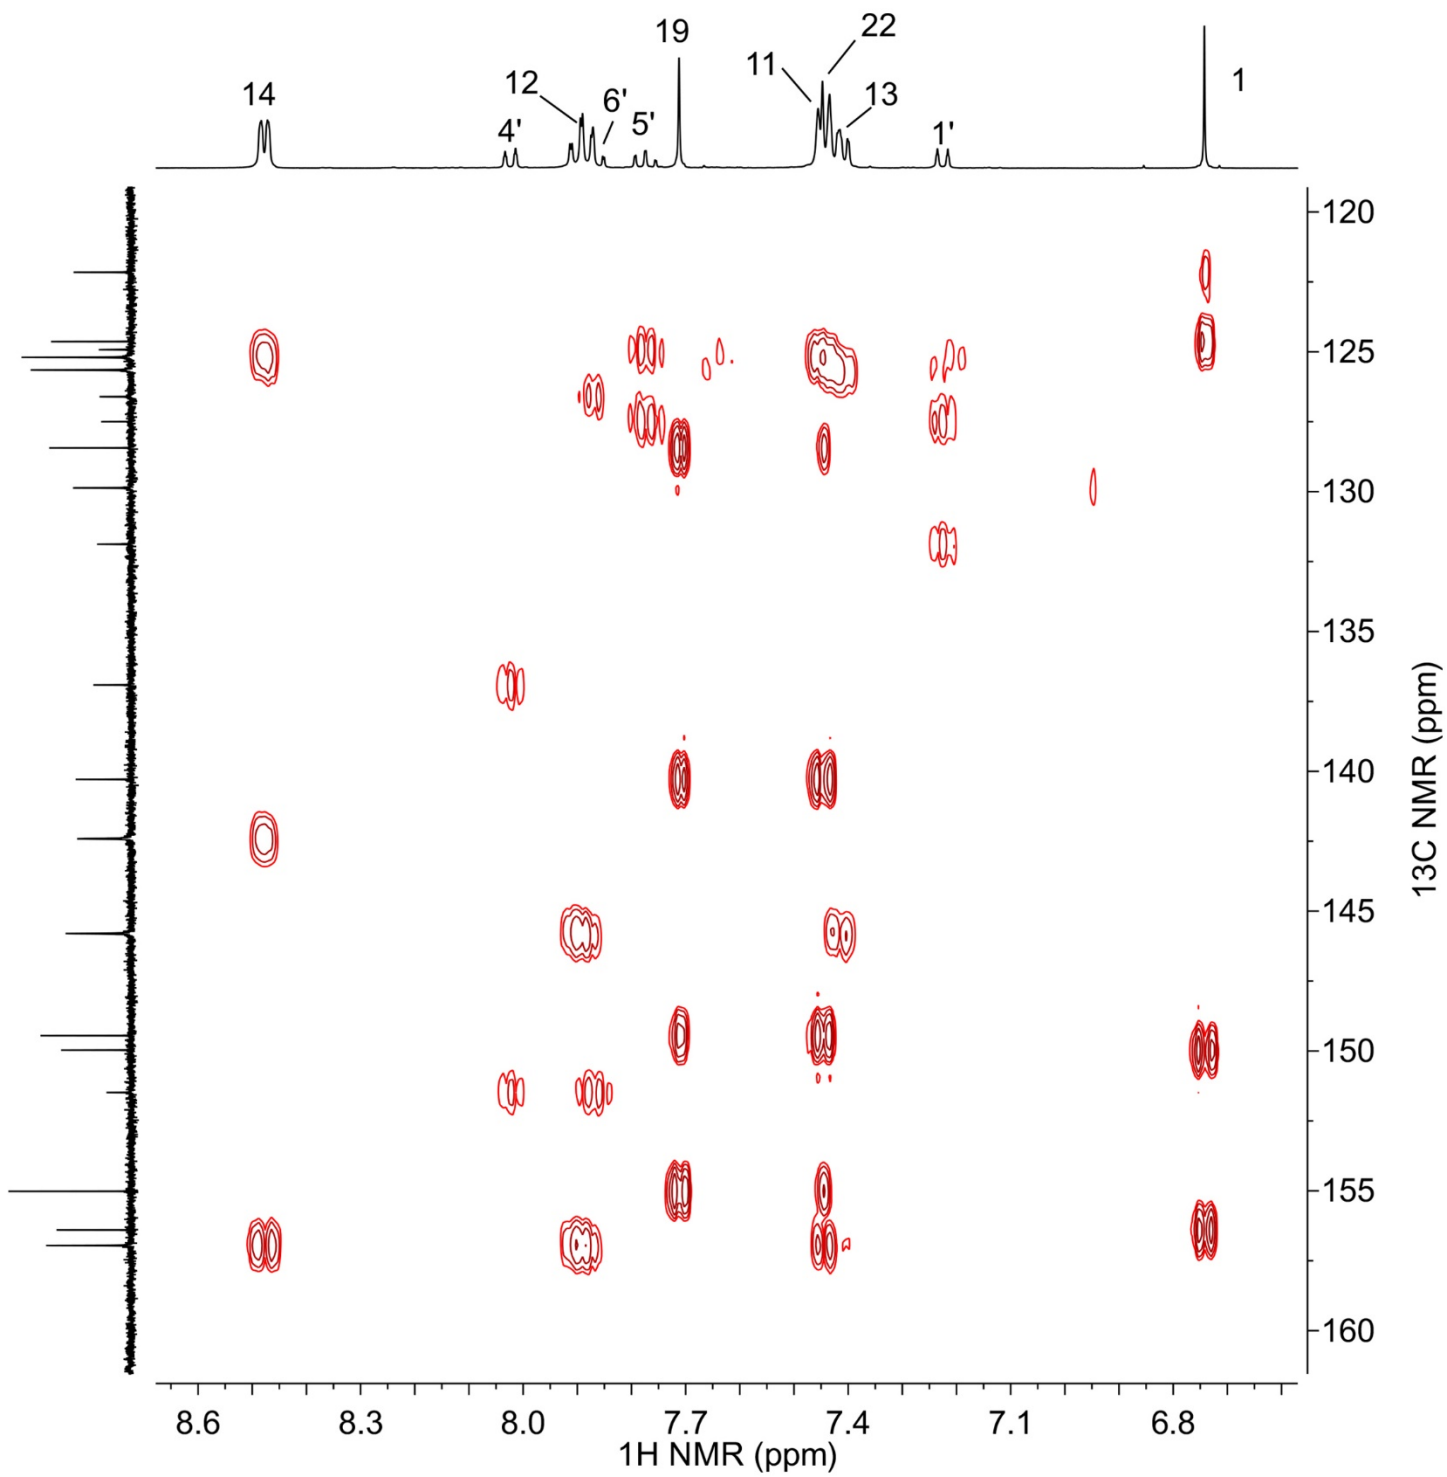

**Figure S87.** Expansion of  $^1\text{H}$ - $^{13}\text{C}$  HMBC spectrum of **2** from 6.6 to 8.7 ppm ( $^1\text{H}$ ) and 120 to 160 ppm ( $^{13}\text{C}$ ).

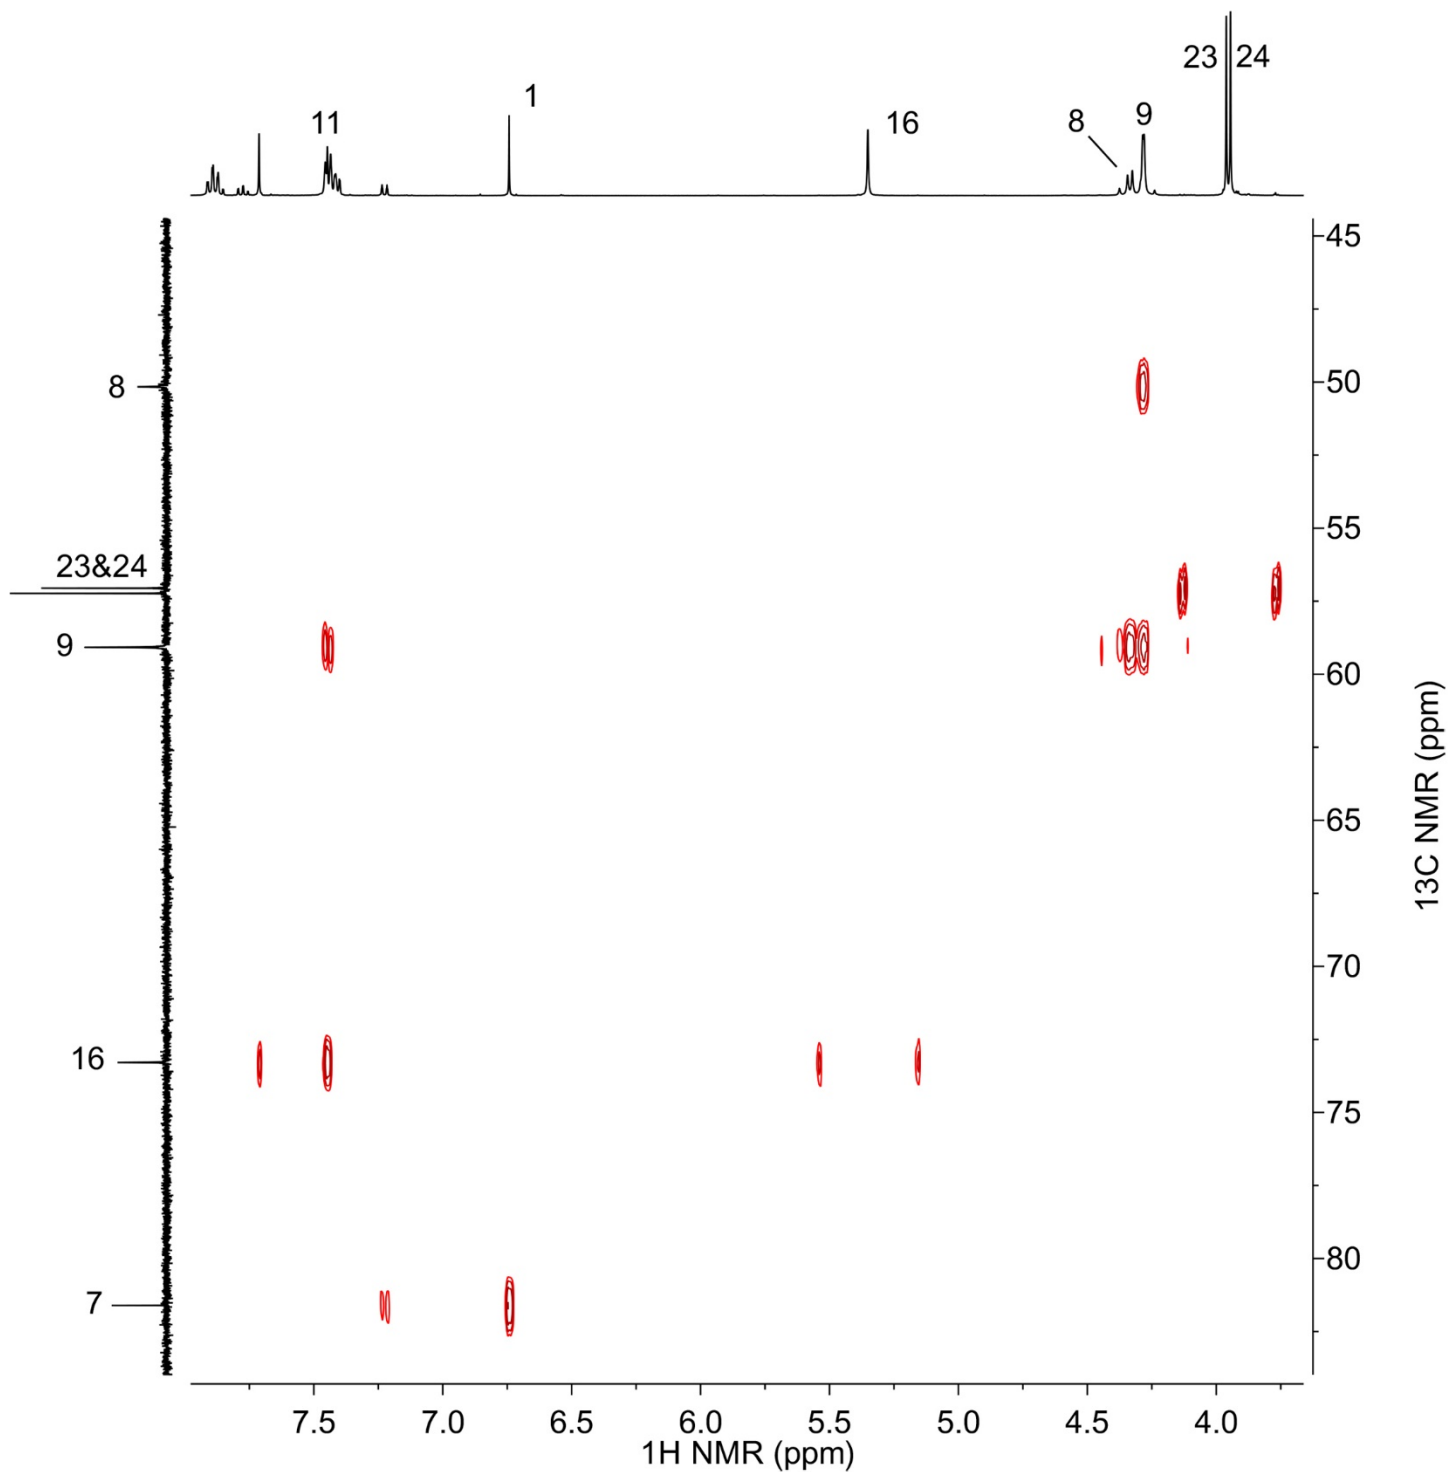

**Figure S88.** Expansion of  $^1\text{H}$ - $^{13}\text{C}$  HMBC spectrum of **2** from 3.7 to 8.0 ppm ( $^1\text{H}$ ) and 45 to 90 ppm ( $^{13}\text{C}$ ).

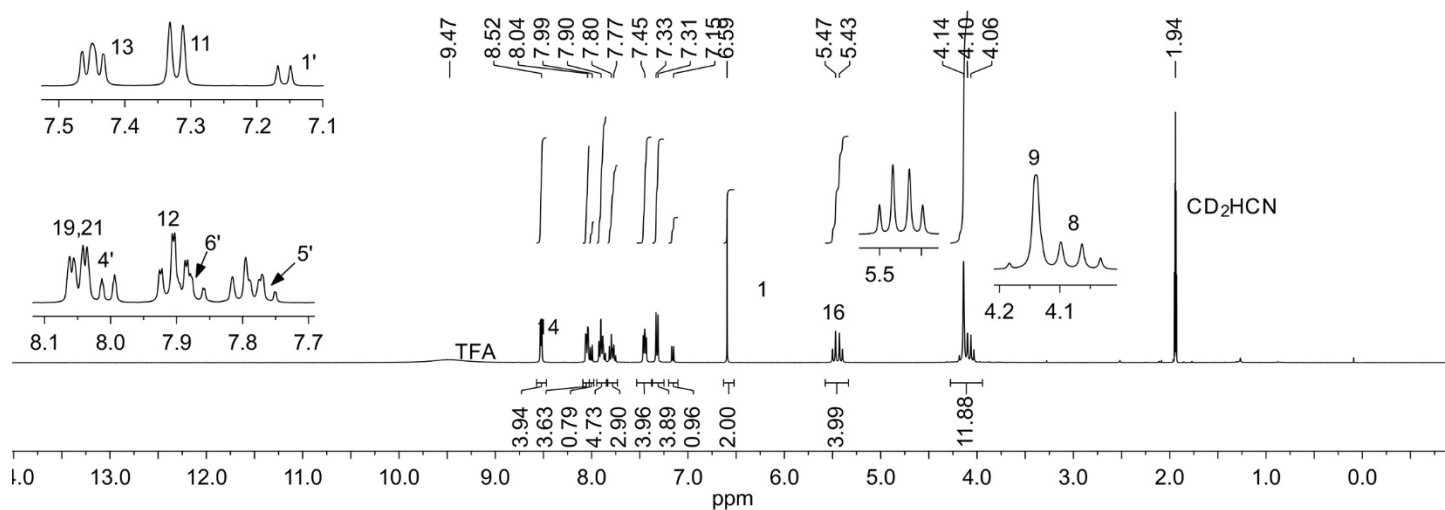

Figure S89.  $^1\text{H}$  NMR spectrum of **3**.

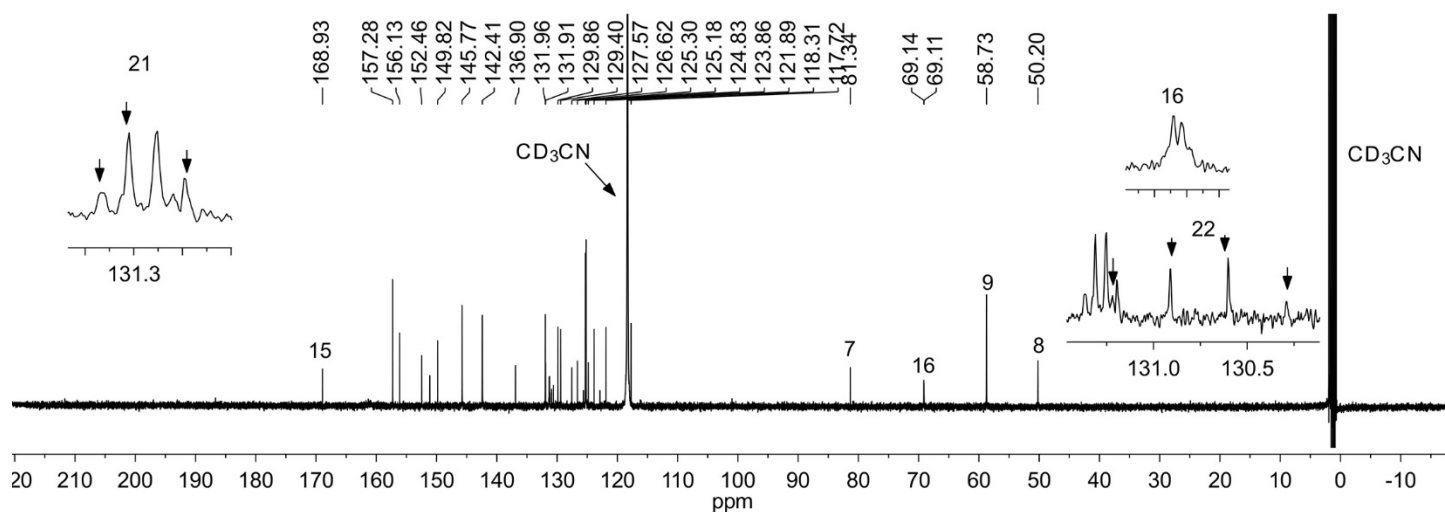

Figure S90.  $^{13}\text{C}\{^1\text{H}\}$  NMR spectrum of **3**.

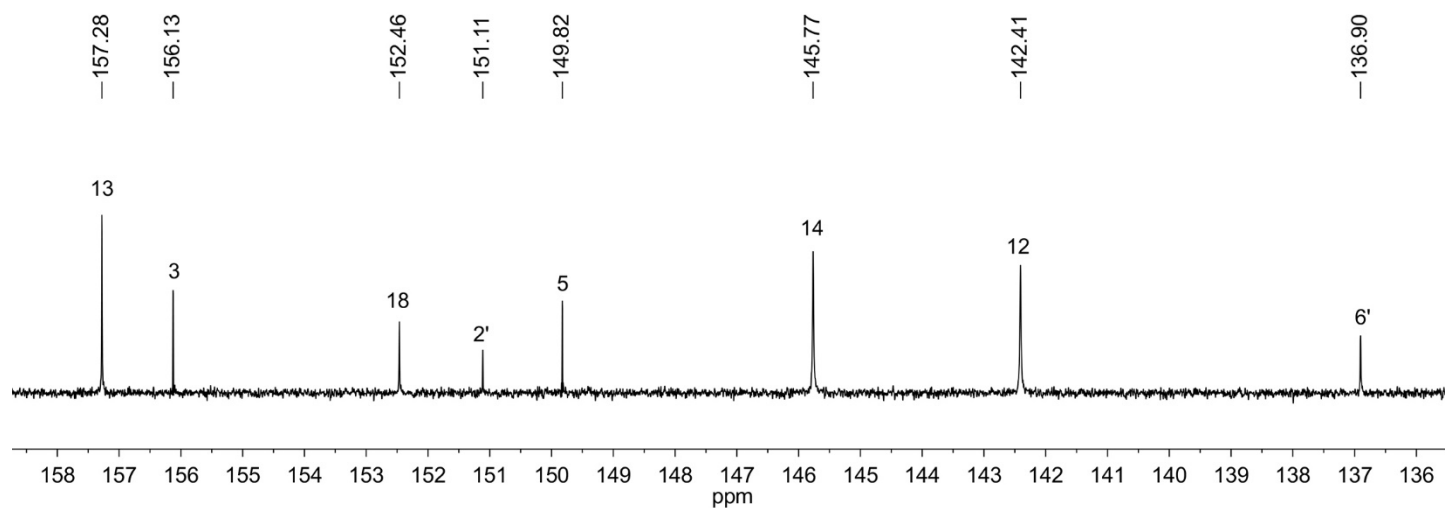

Figure S91. Expansion of  $^{13}\text{C}\{^1\text{H}\}$  NMR spectrum of **3** from 136 to 159 ppm.

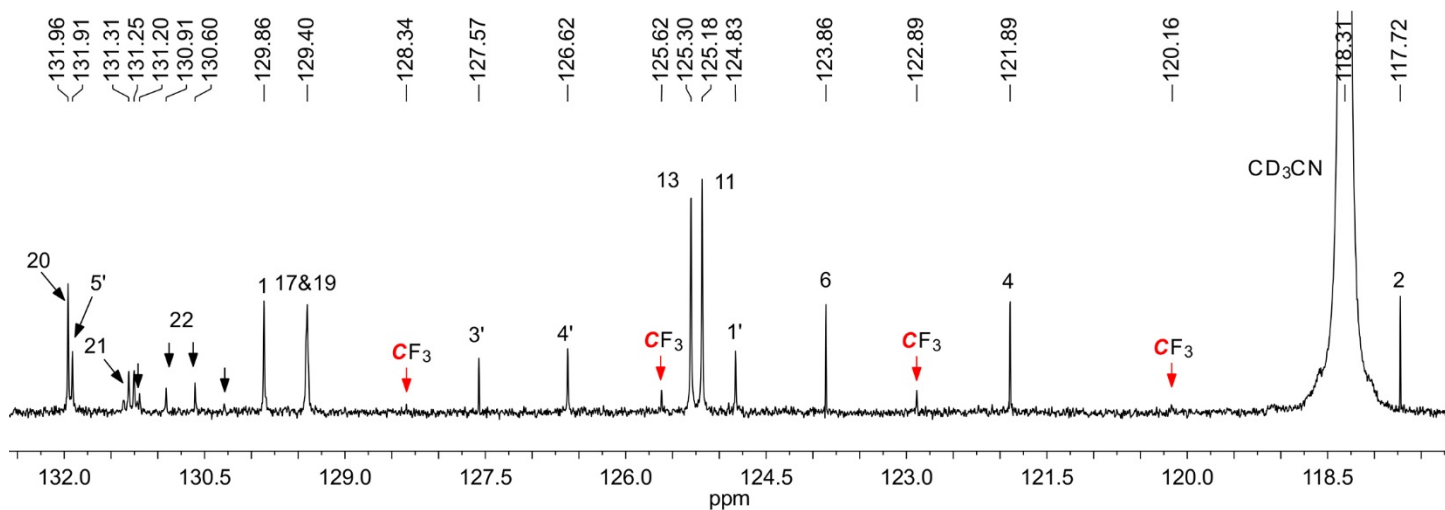

**Figure S92.** Expansion of  $^{13}\text{C}\{^1\text{H}\}$  NMR spectrum of **3** from 117 to 132 ppm.

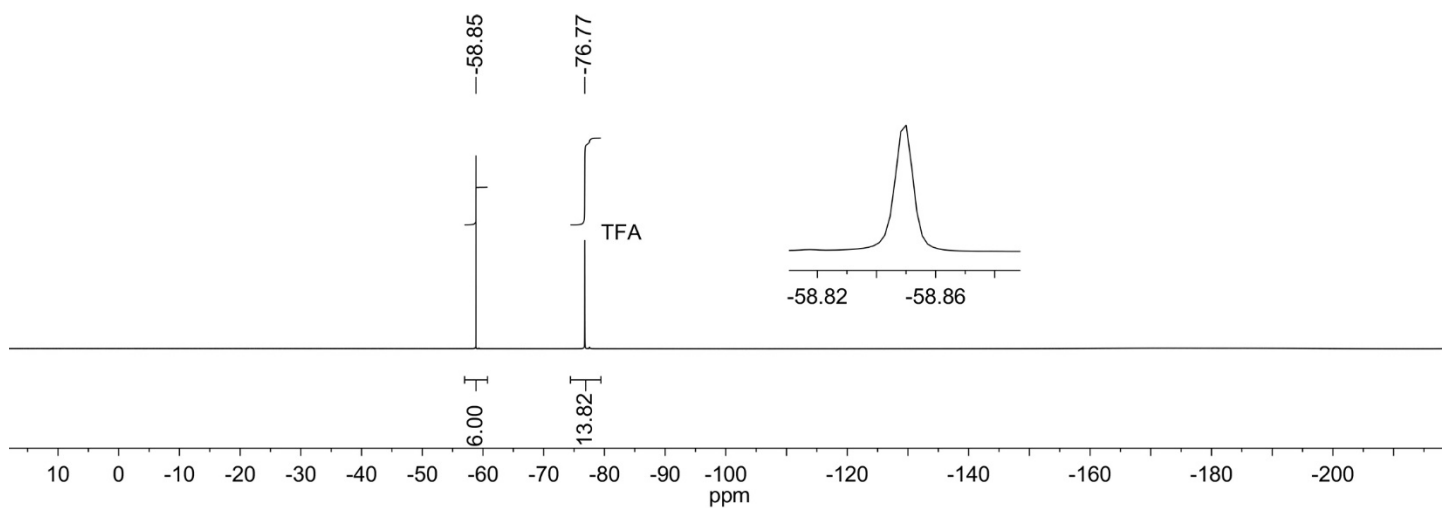

**Figure S93.**  $^{19}\text{F}$  NMR spectrum of **3**.

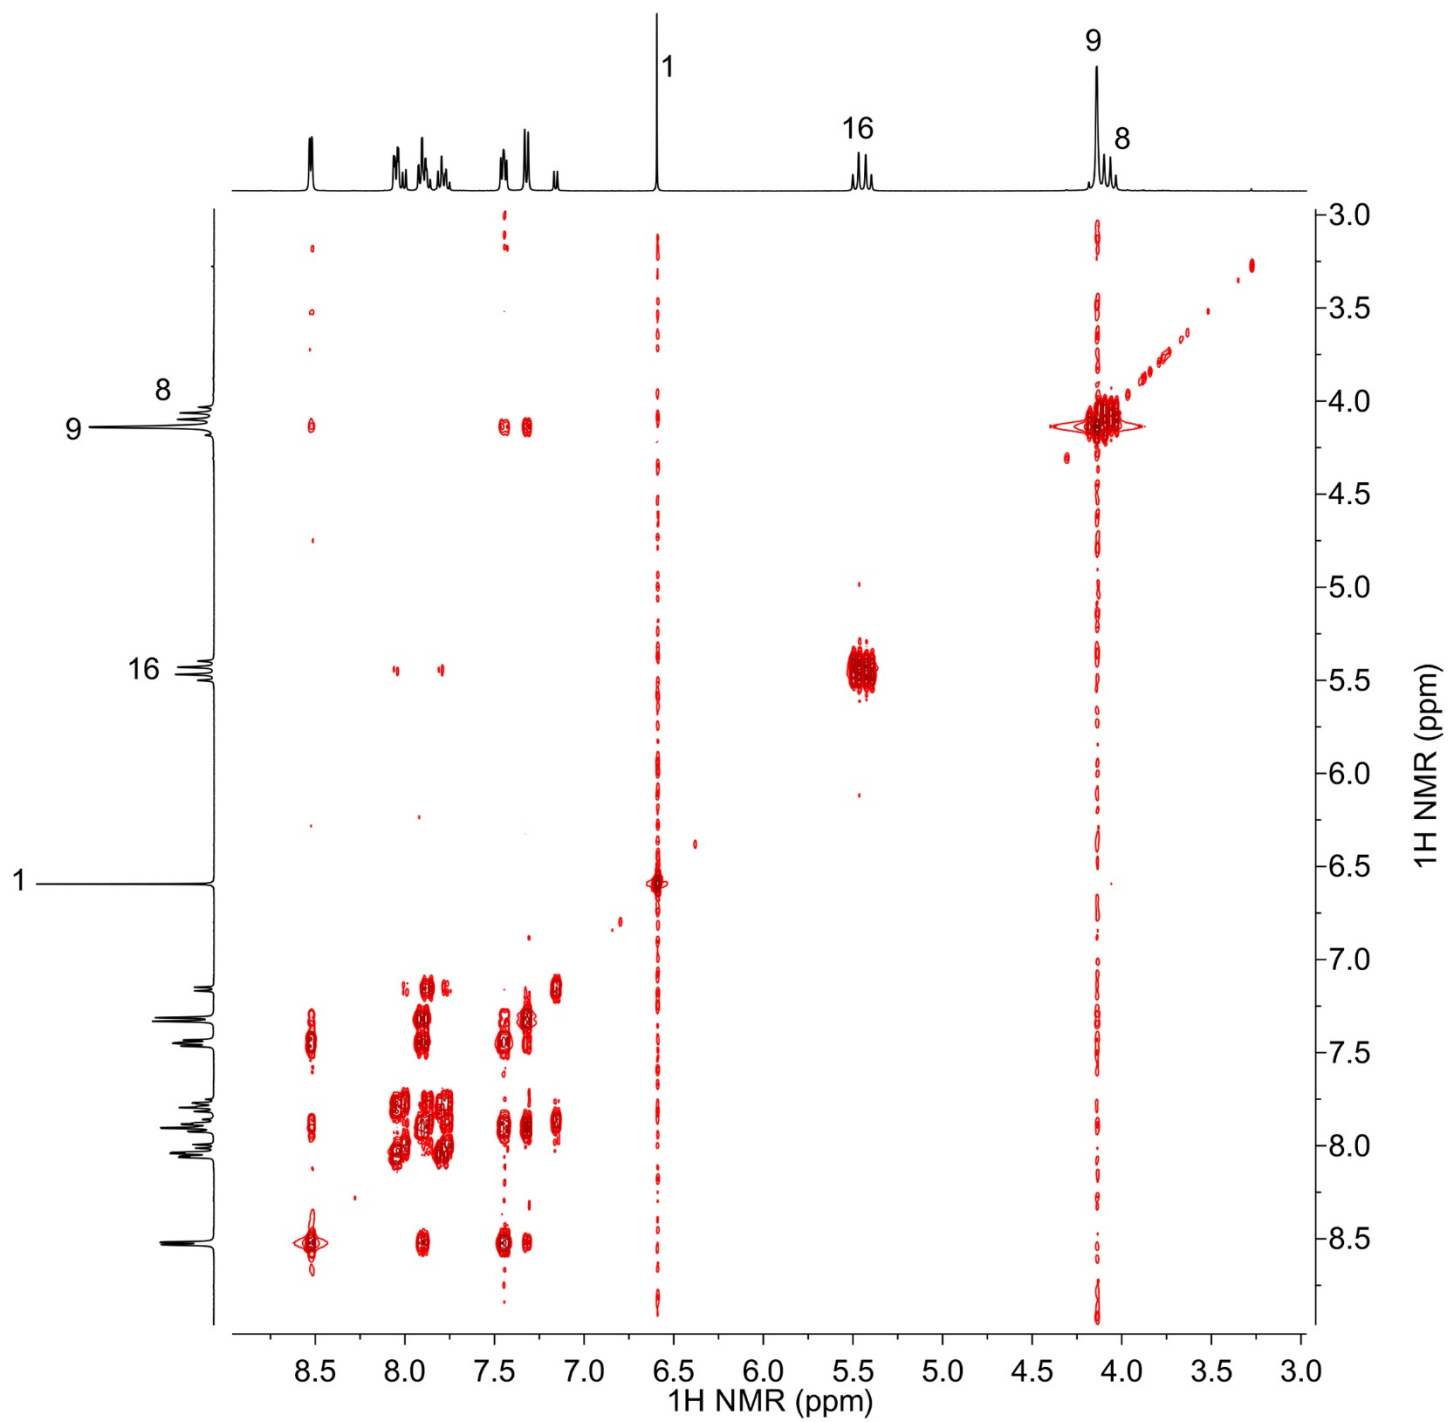

**Figure S94.**  $^1\text{H}$ - $^1\text{H}$  COSY spectrum of **3**.

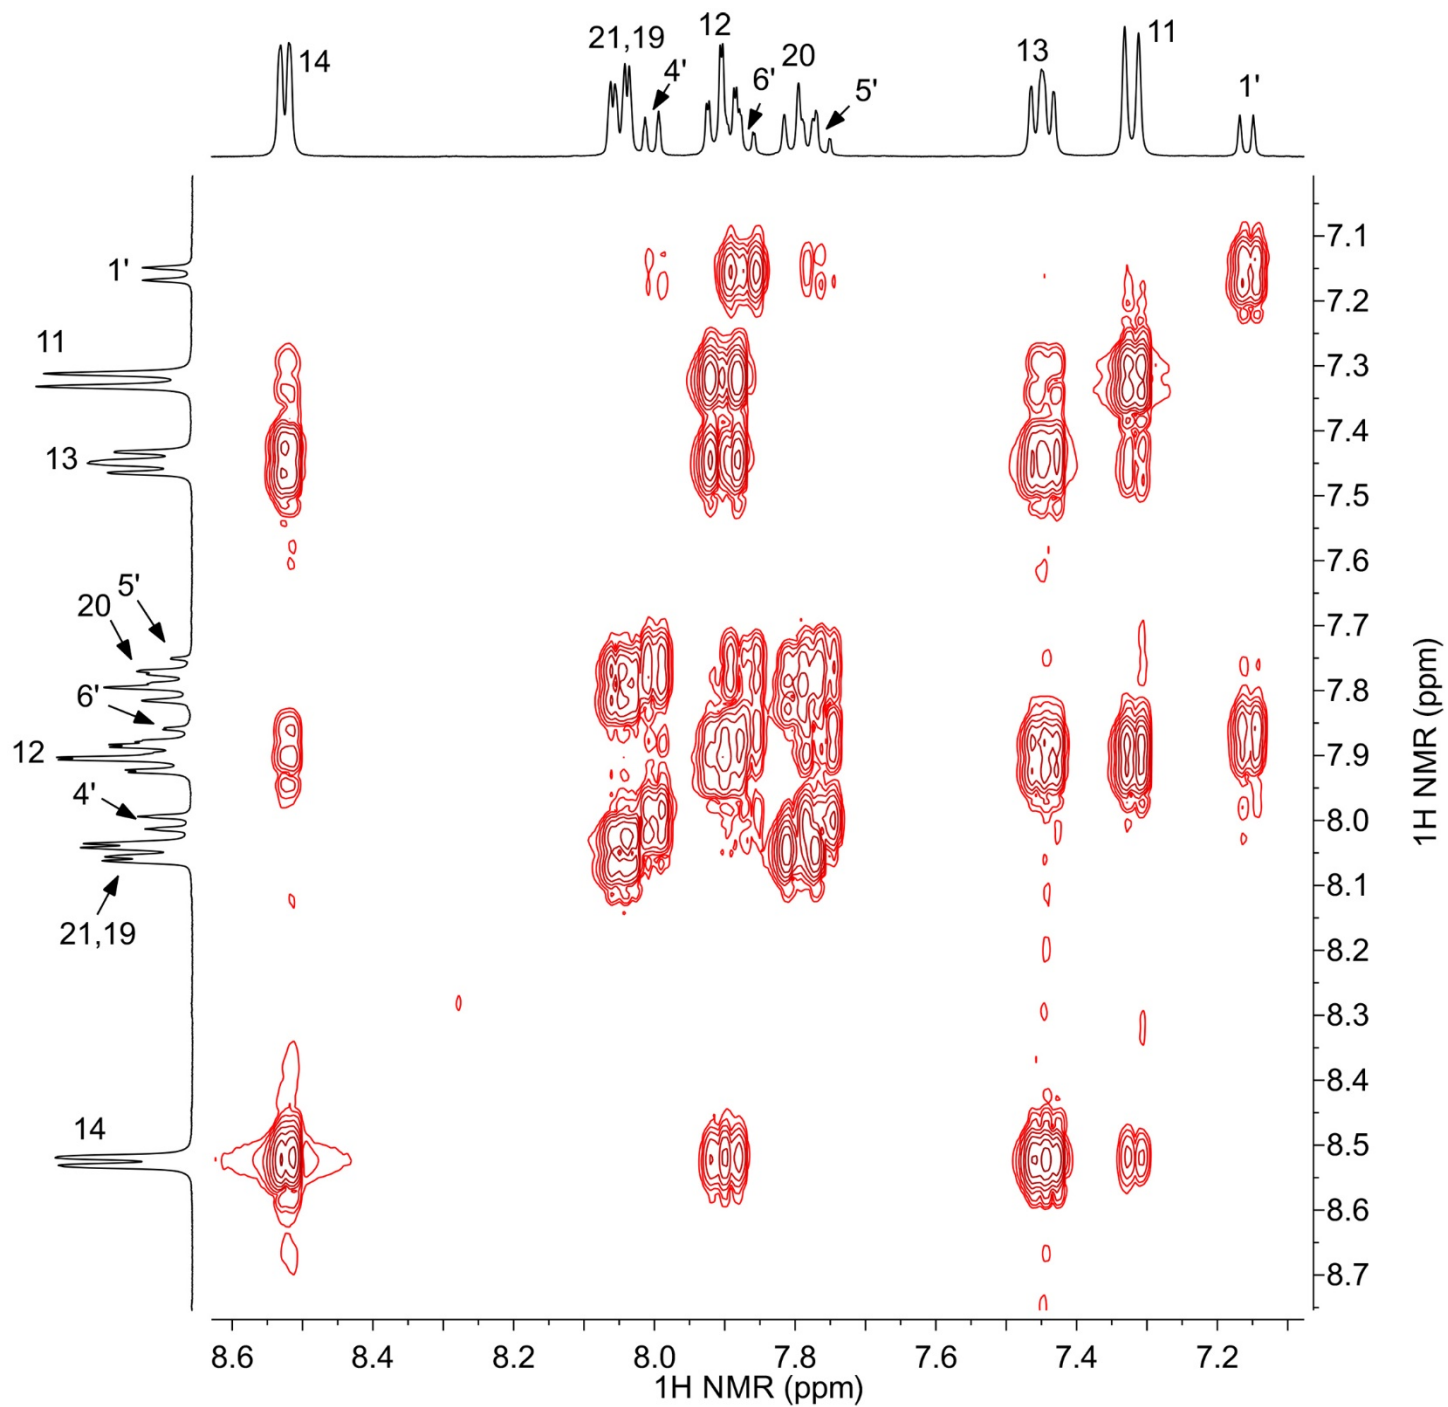

**Figure S95.** Expansion of  $^1\text{H}$ - $^1\text{H}$  COSY spectrum of **3**.



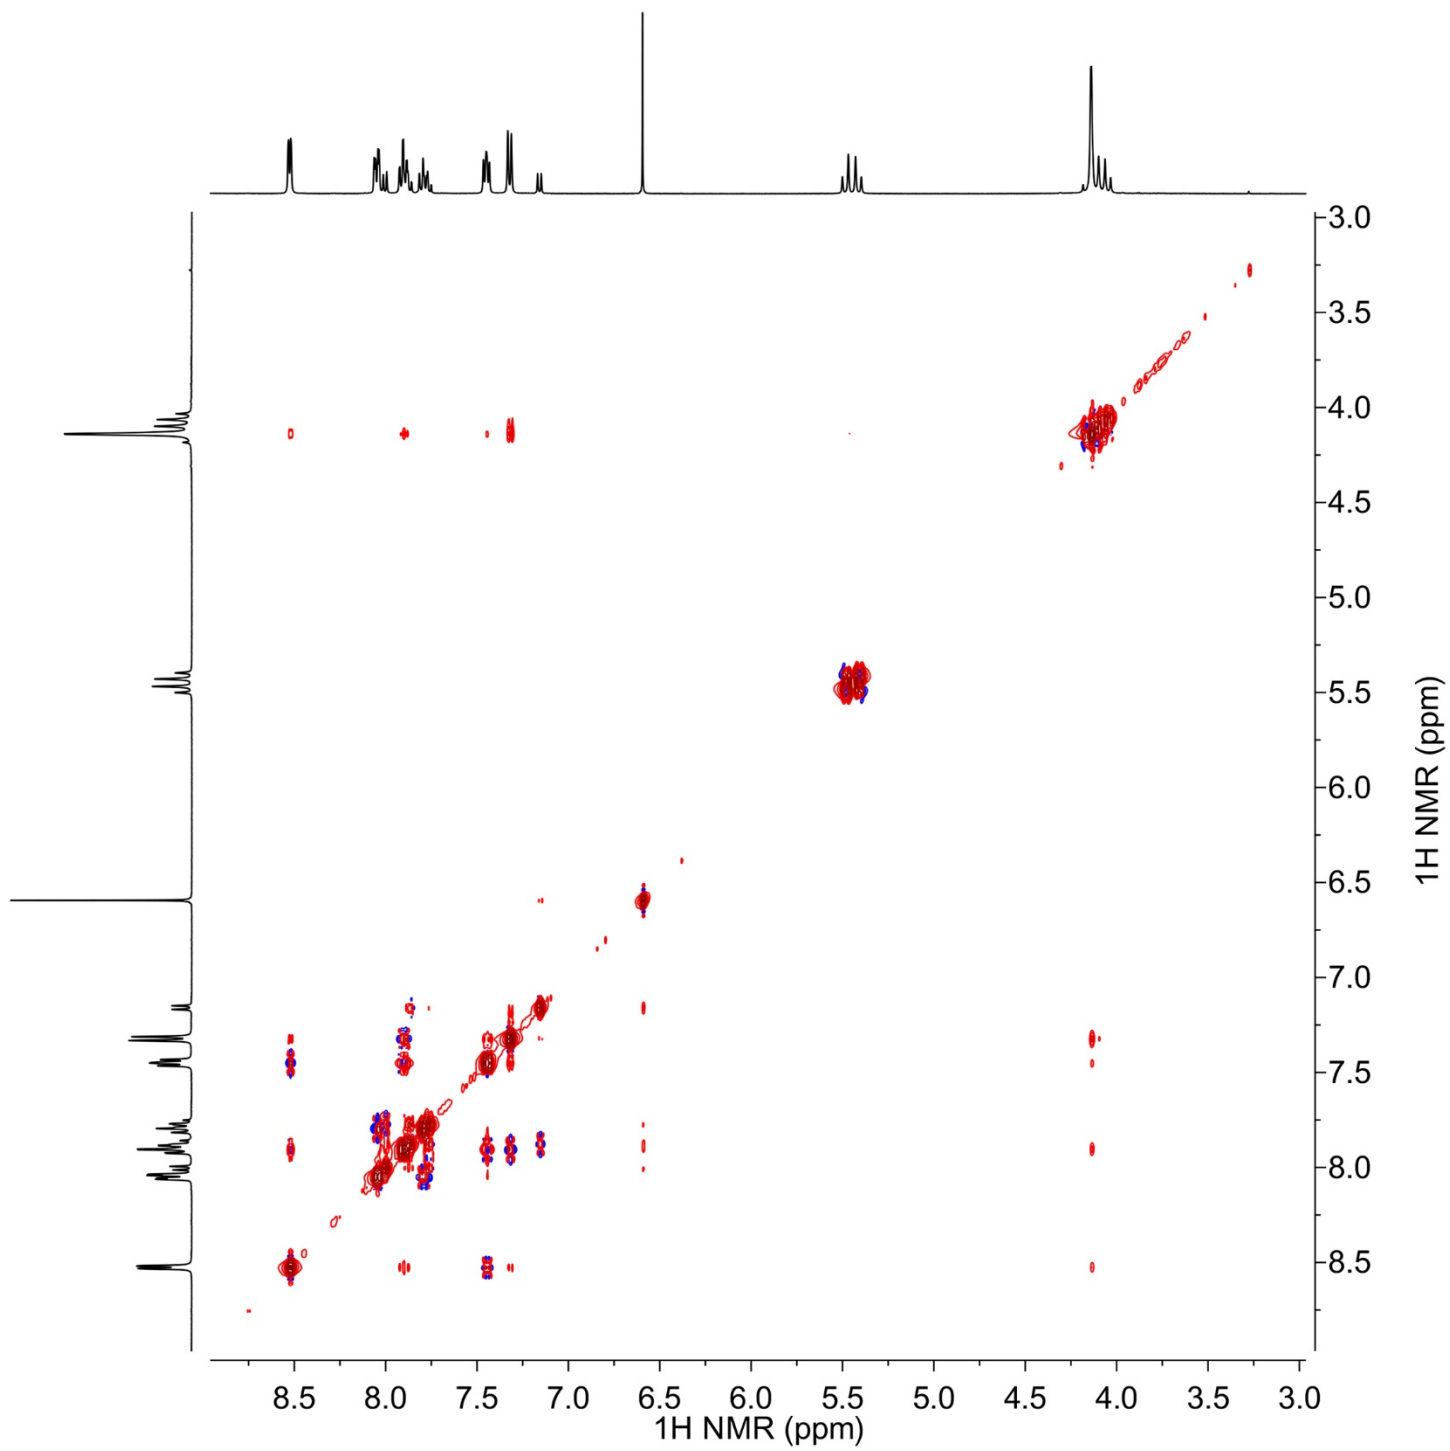

**Figure S96.**  $^1\text{H}$ - $^1\text{H}$  NOESY spectrum of **3**.

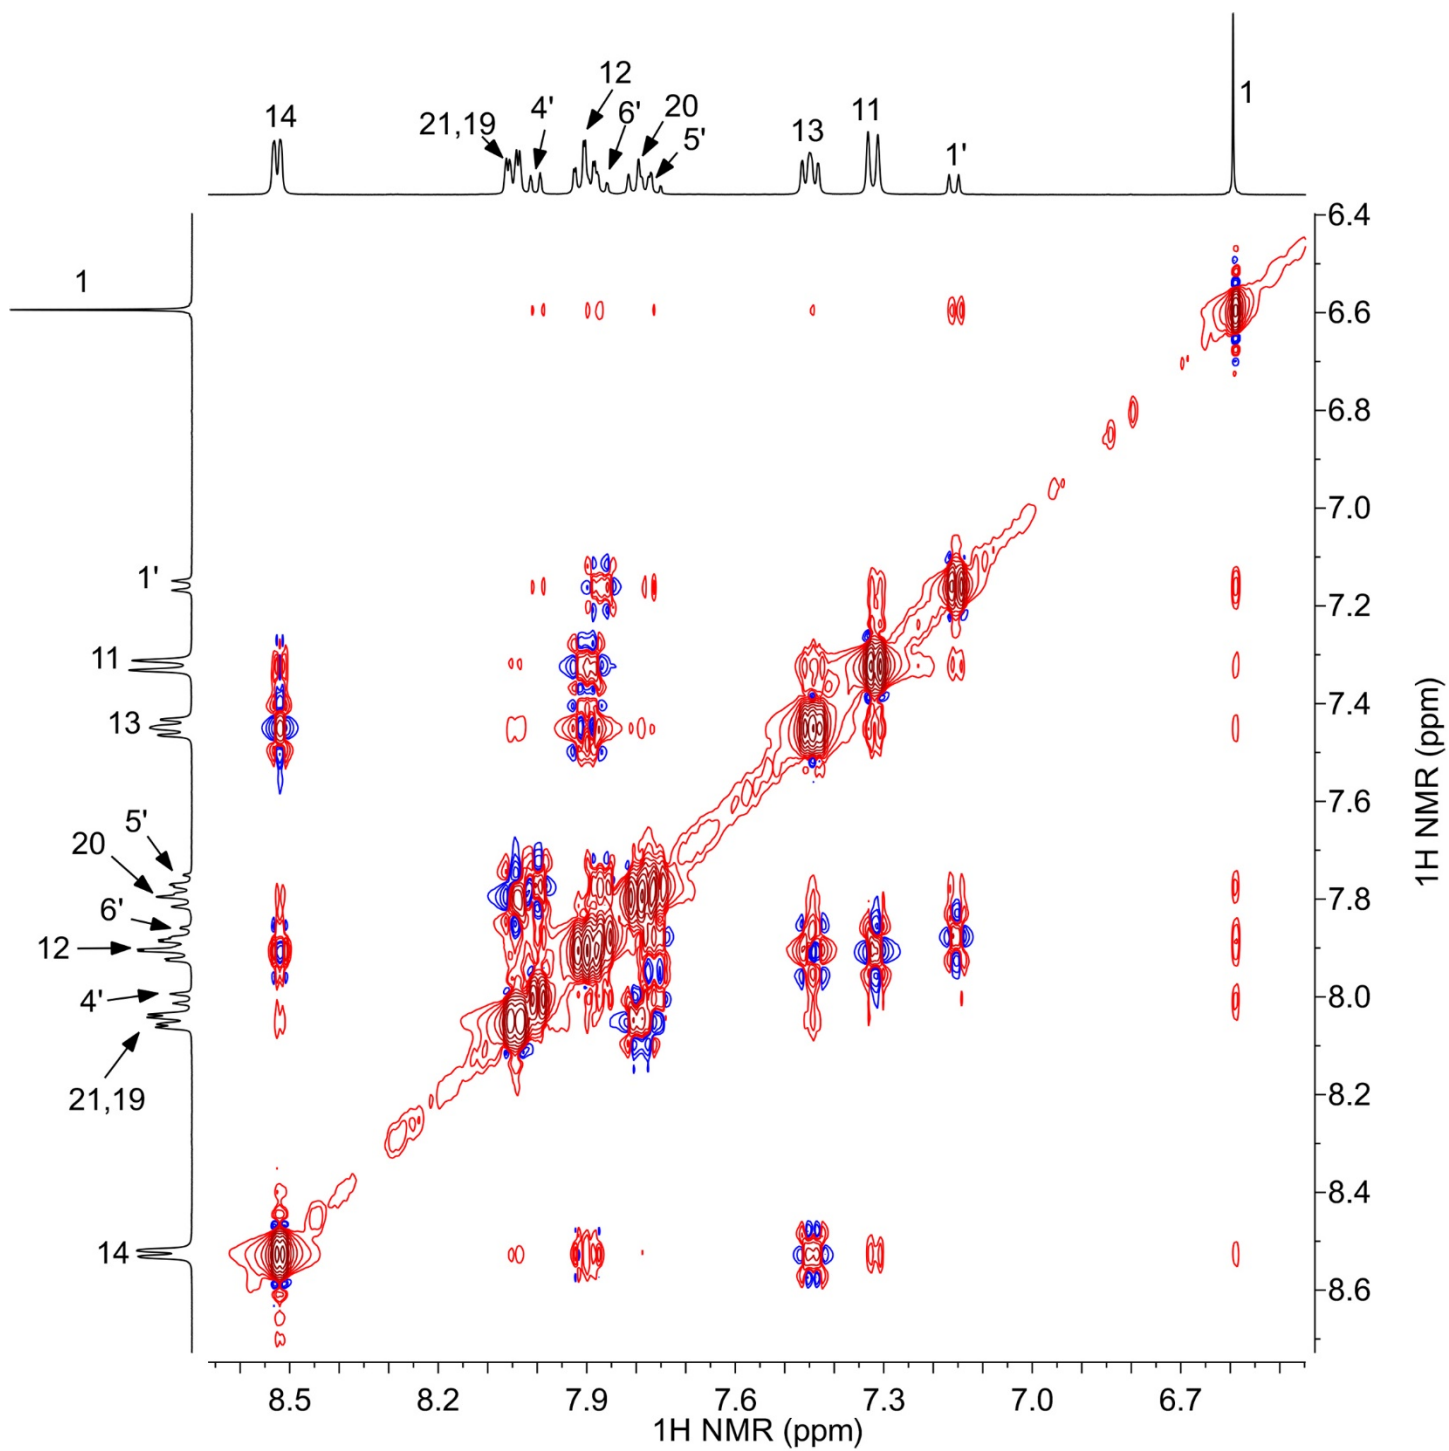

**Figure S97.** Expansion of  $^1\text{H}$ - $^1\text{H}$  NOESY spectrum of **3** from 6.4 to 8.7 ppm.

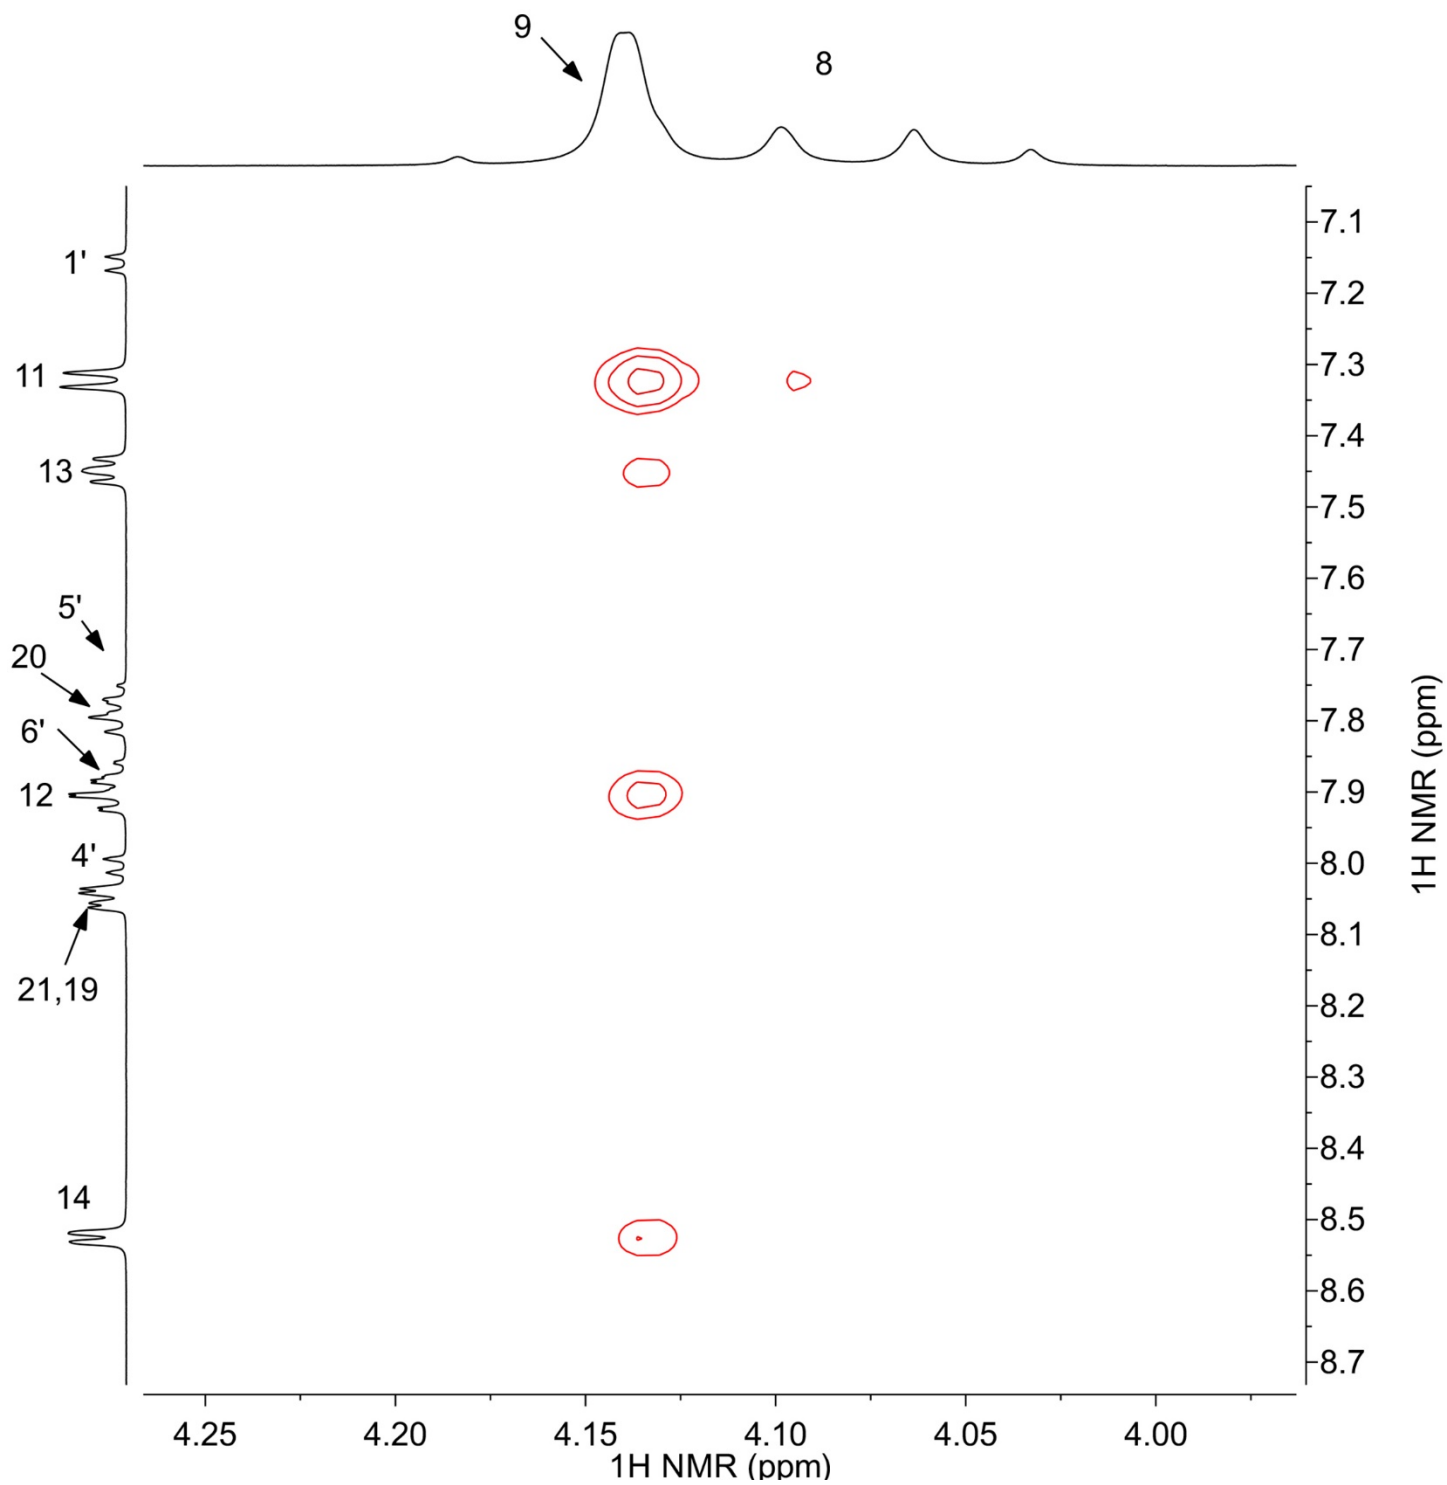

**Figure S98.** Expansion of  $^1\text{H}$ - $^1\text{H}$  NOESY spectrum of **3** from 4.0 to 4.3 ppm.

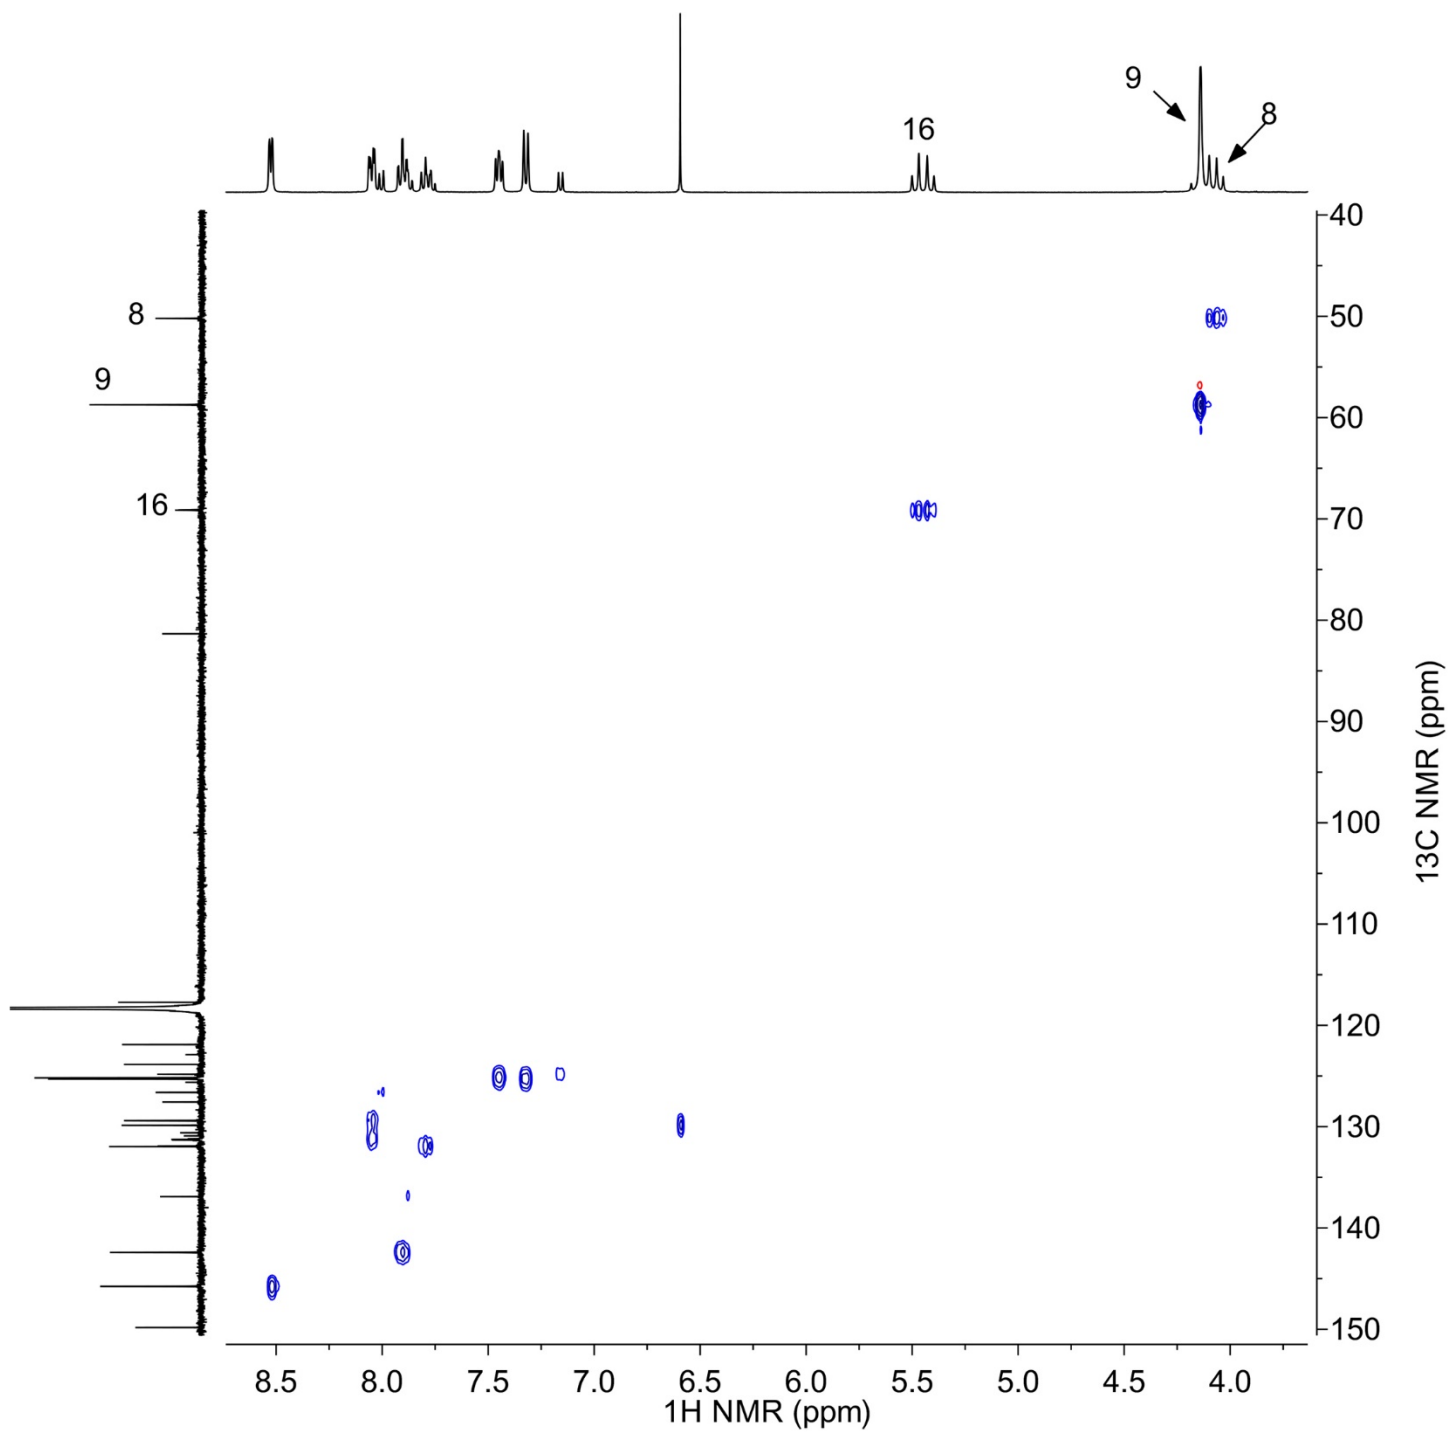

Figure S99.  $^1\text{H}$ - $^{13}\text{C}$  HSQC spectrum of **3**.

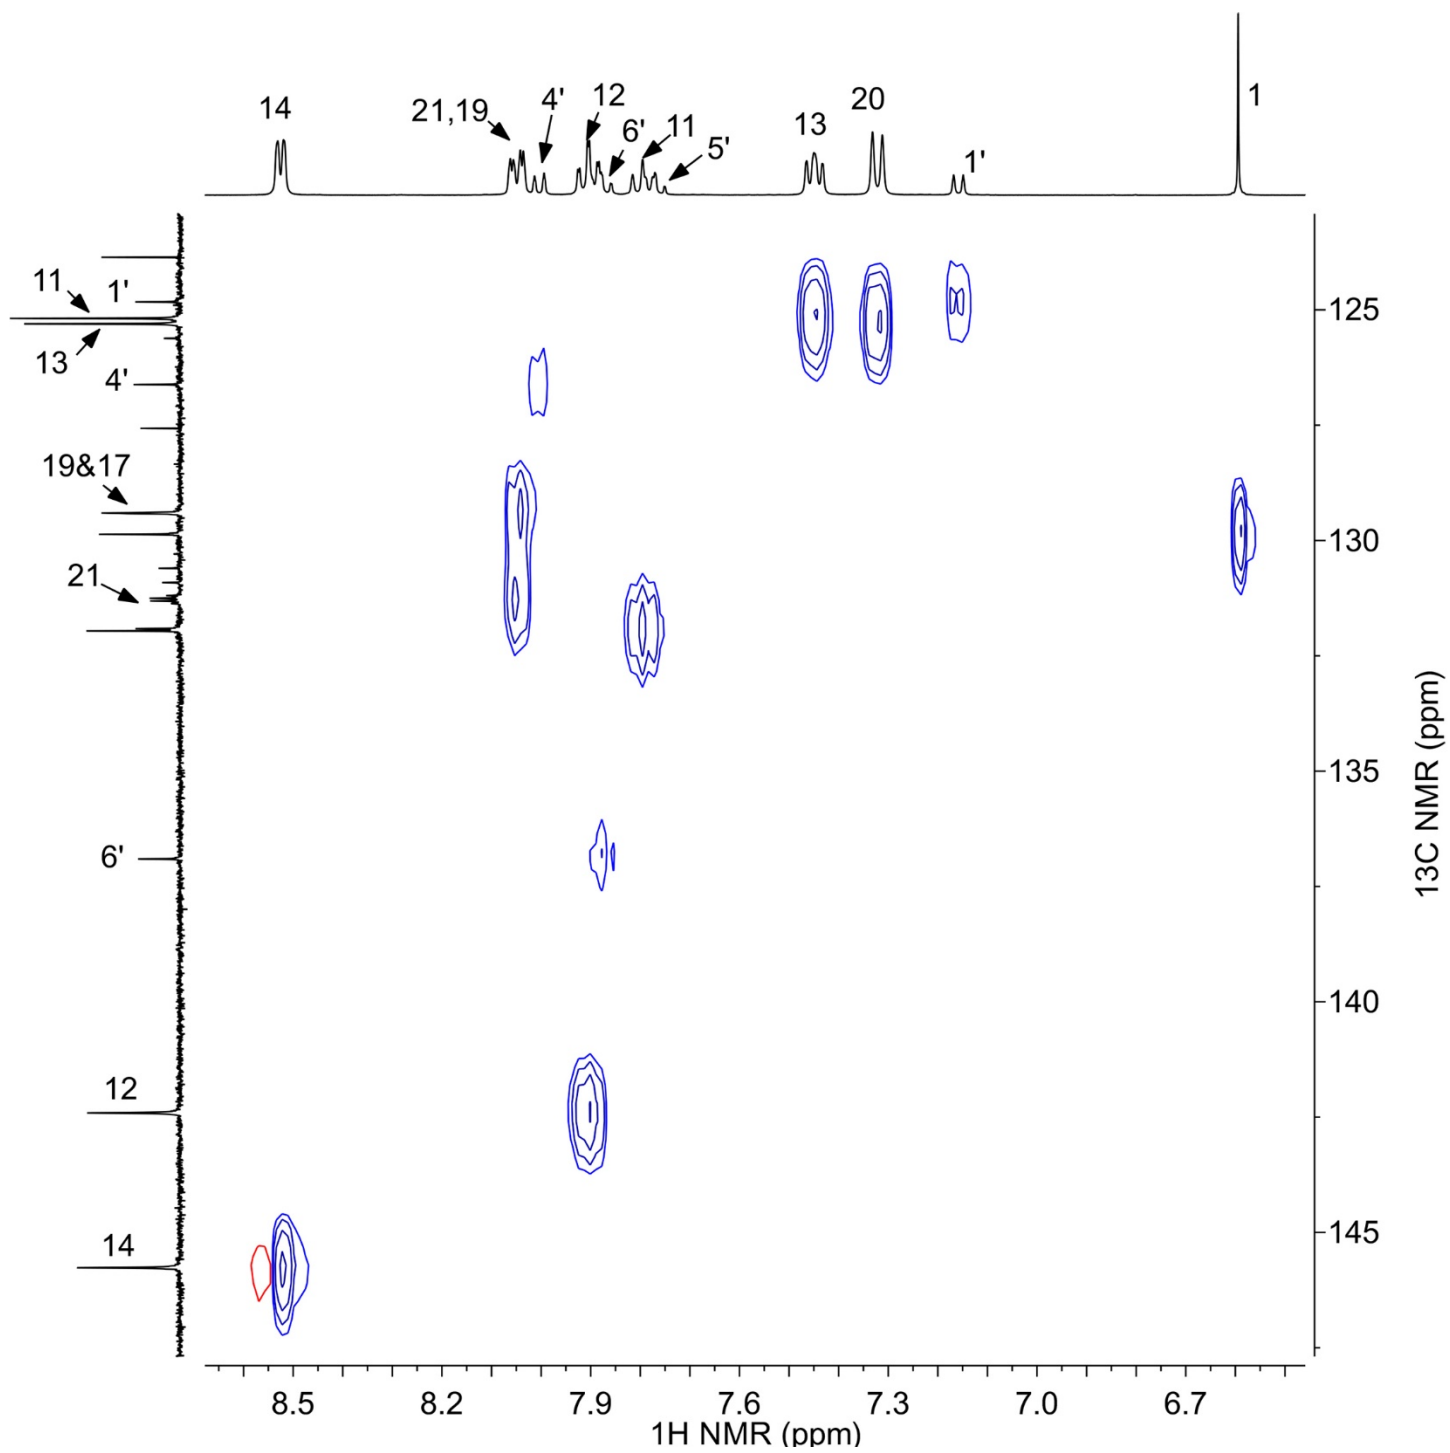

**Figure S100.** Expansion of  $^1\text{H}$ - $^{13}\text{C}$  HSQC spectrum of **3**.

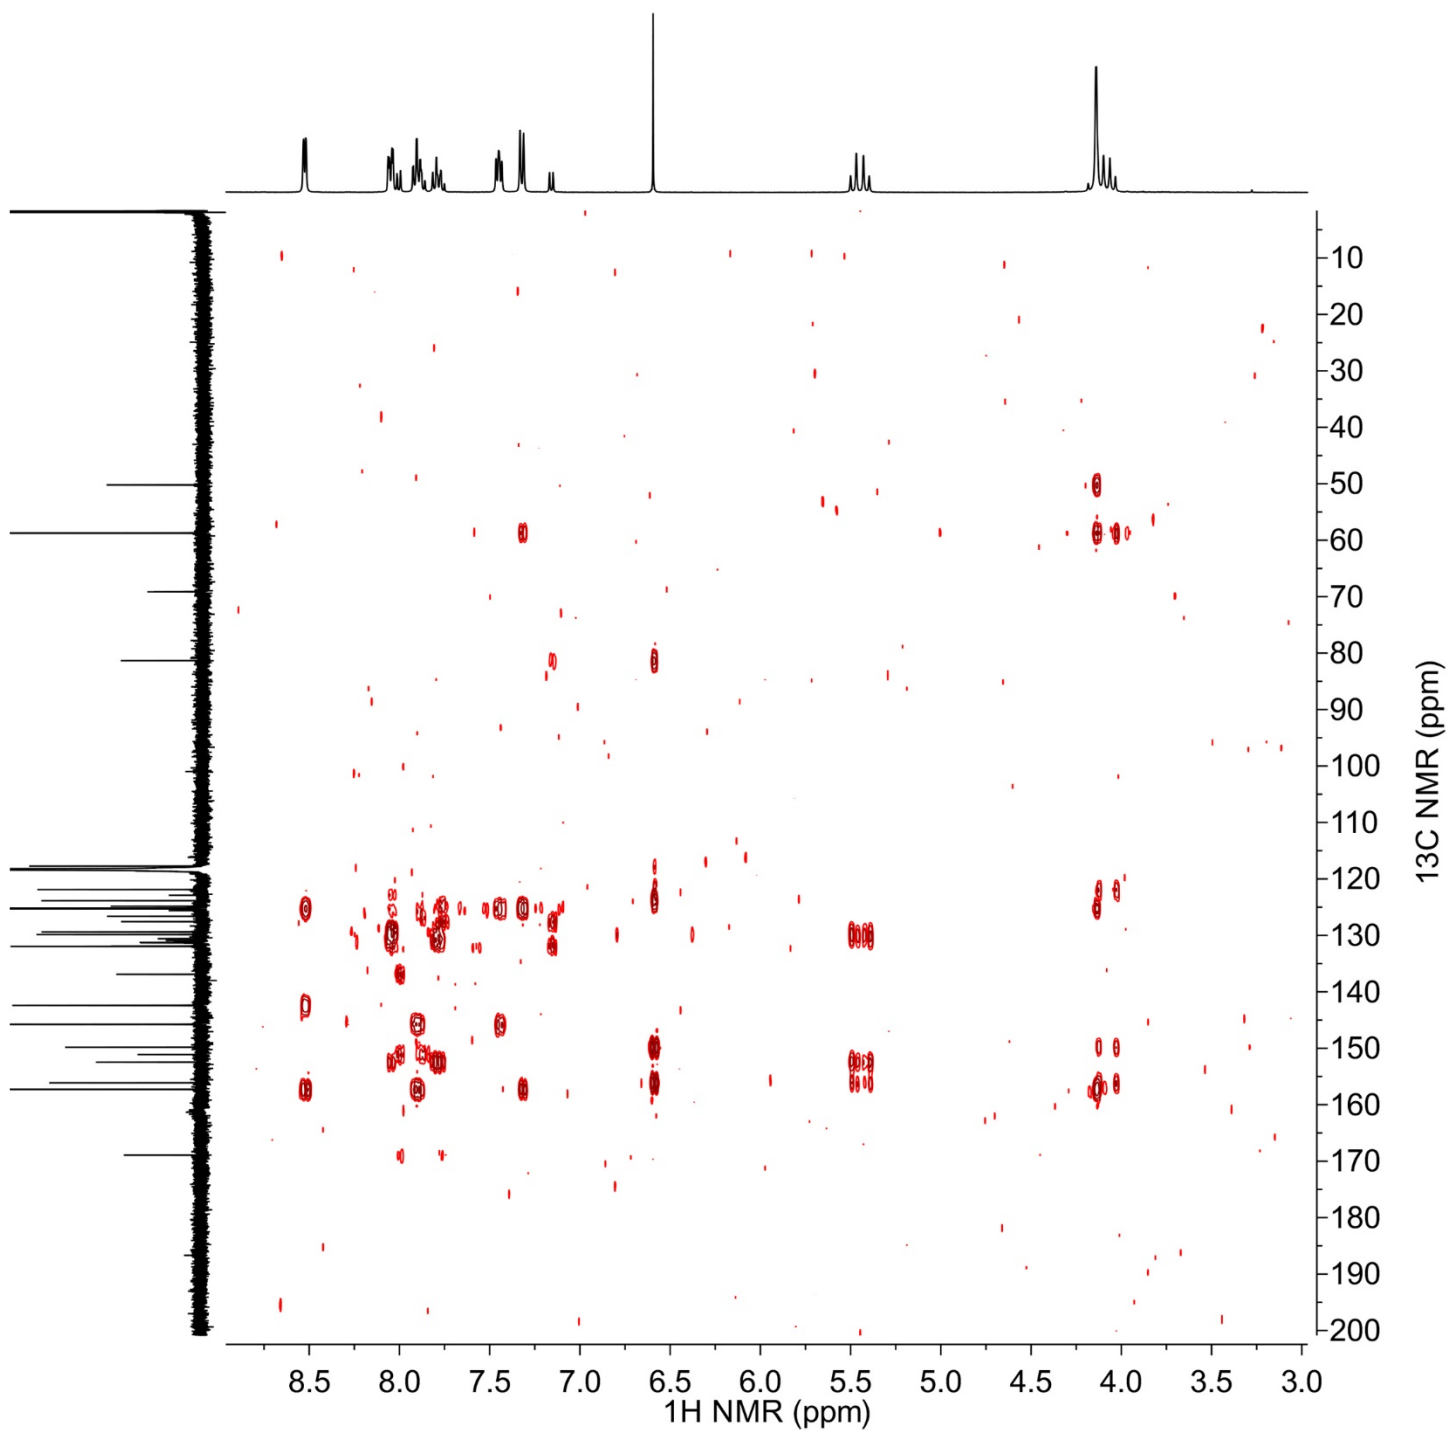

Figure S101.  $^1\text{H}$ - $^{13}\text{C}$  HMBC spectrum of **3**.

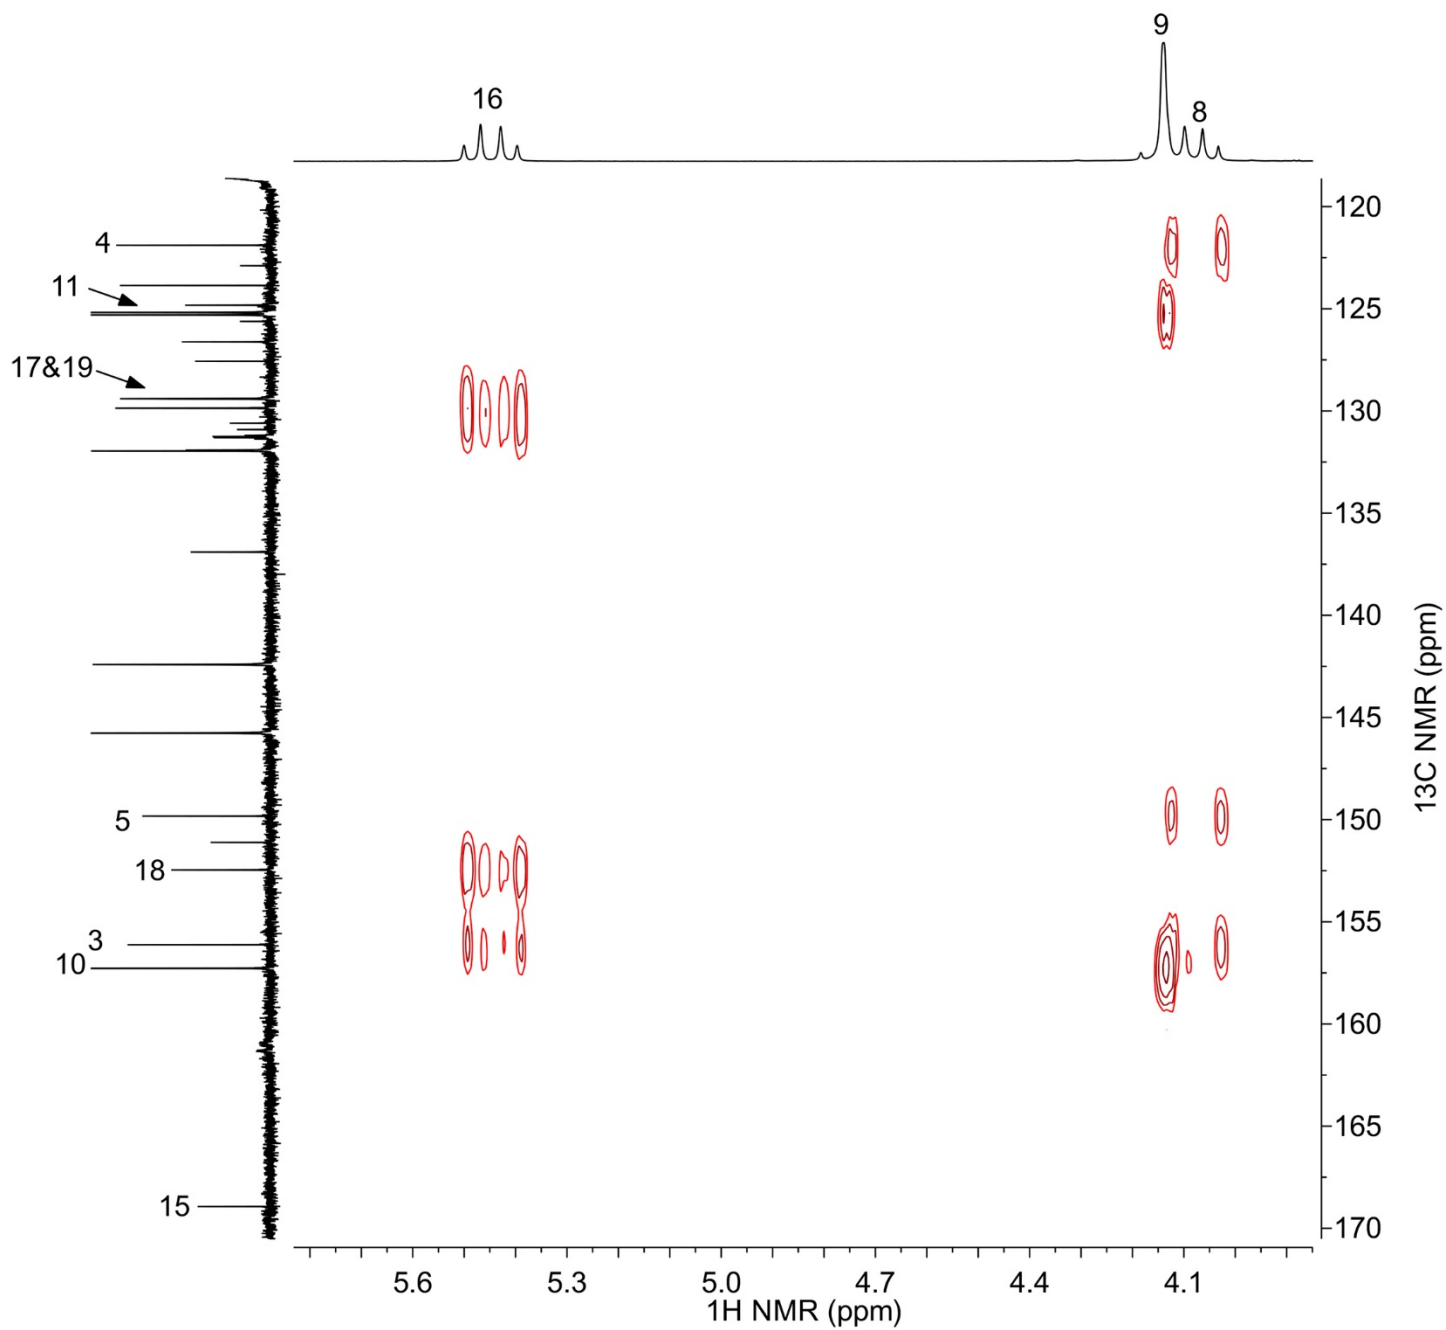

**Figure S102.** Expansion of  $^1\text{H}$ - $^{13}\text{C}$  HMBC spectrum of **3** from 3.9 to 5.8 ppm ( $^1\text{H}$ ) and 120 to 170 ppm ( $^{13}\text{C}$ ).

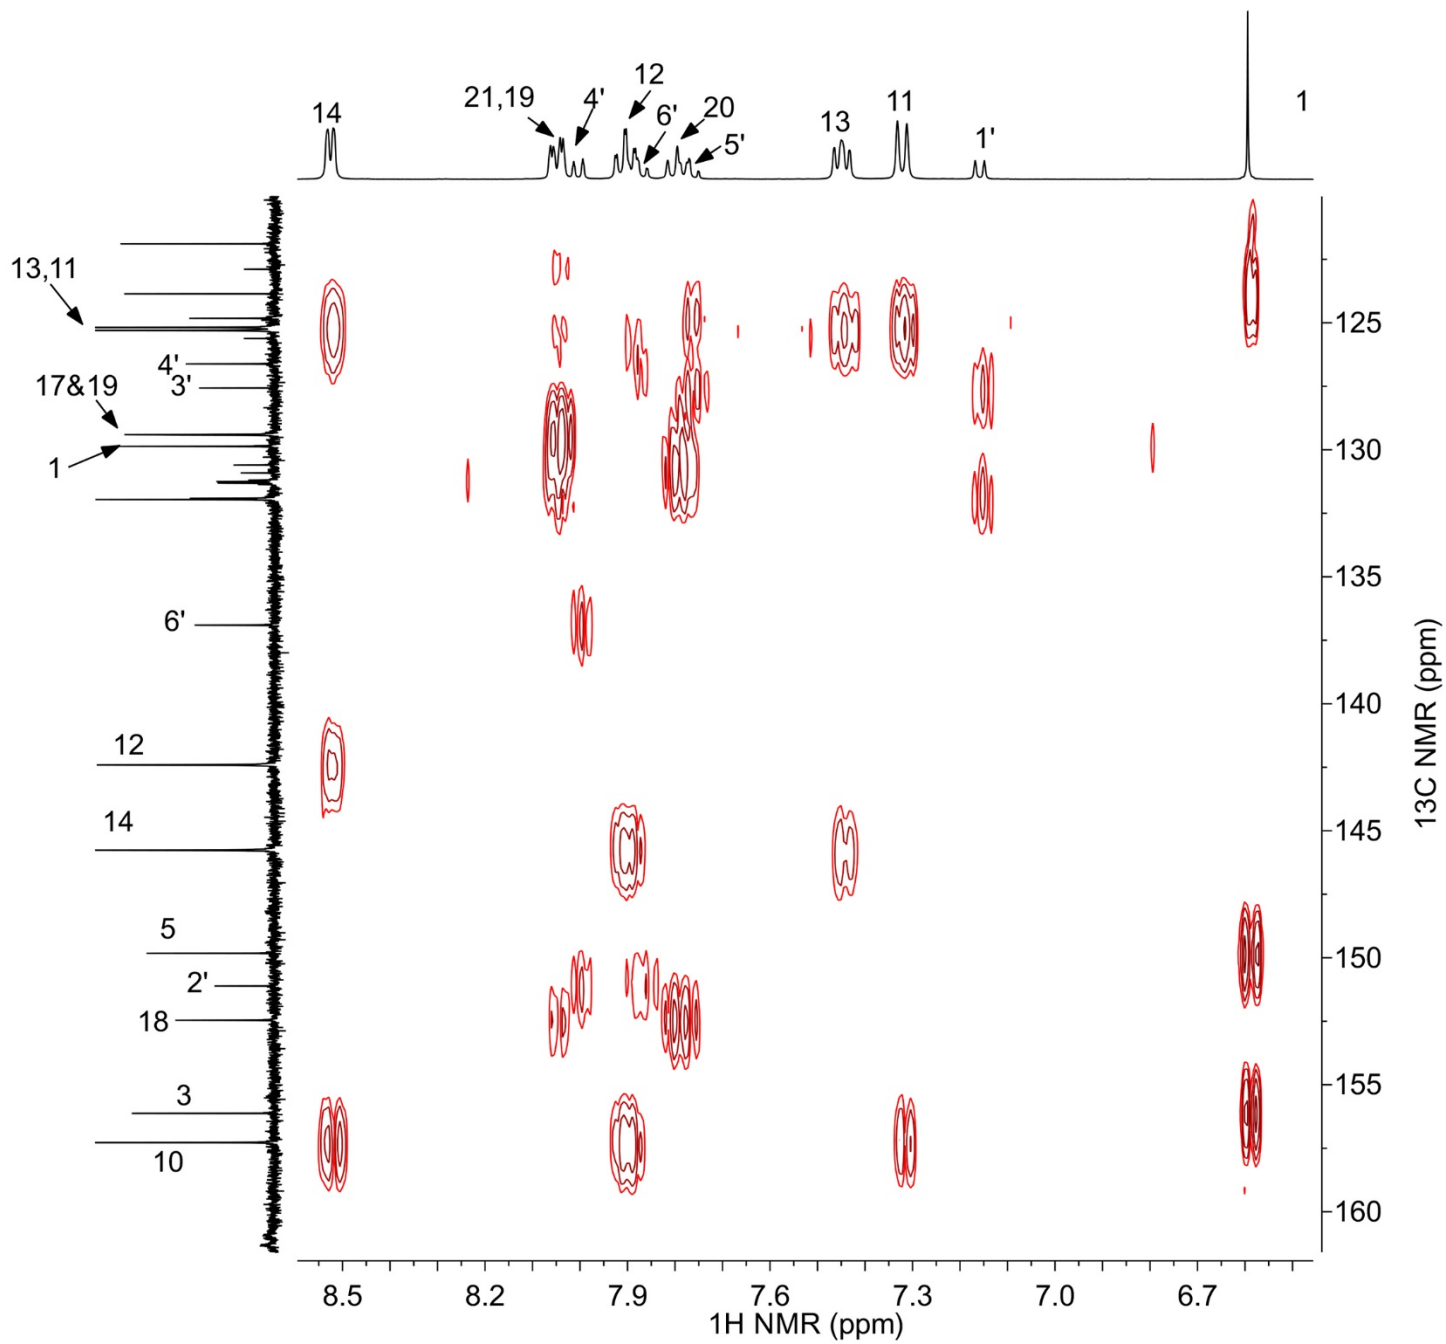

**Figure S103.** Expansion of  $^1\text{H}$ - $^{13}\text{C}$  HMBC spectrum of **3** from 6.5 to 8.6 ppm ( $^1\text{H}$ ) and 120 to 160 ppm ( $^{13}\text{C}$ ).



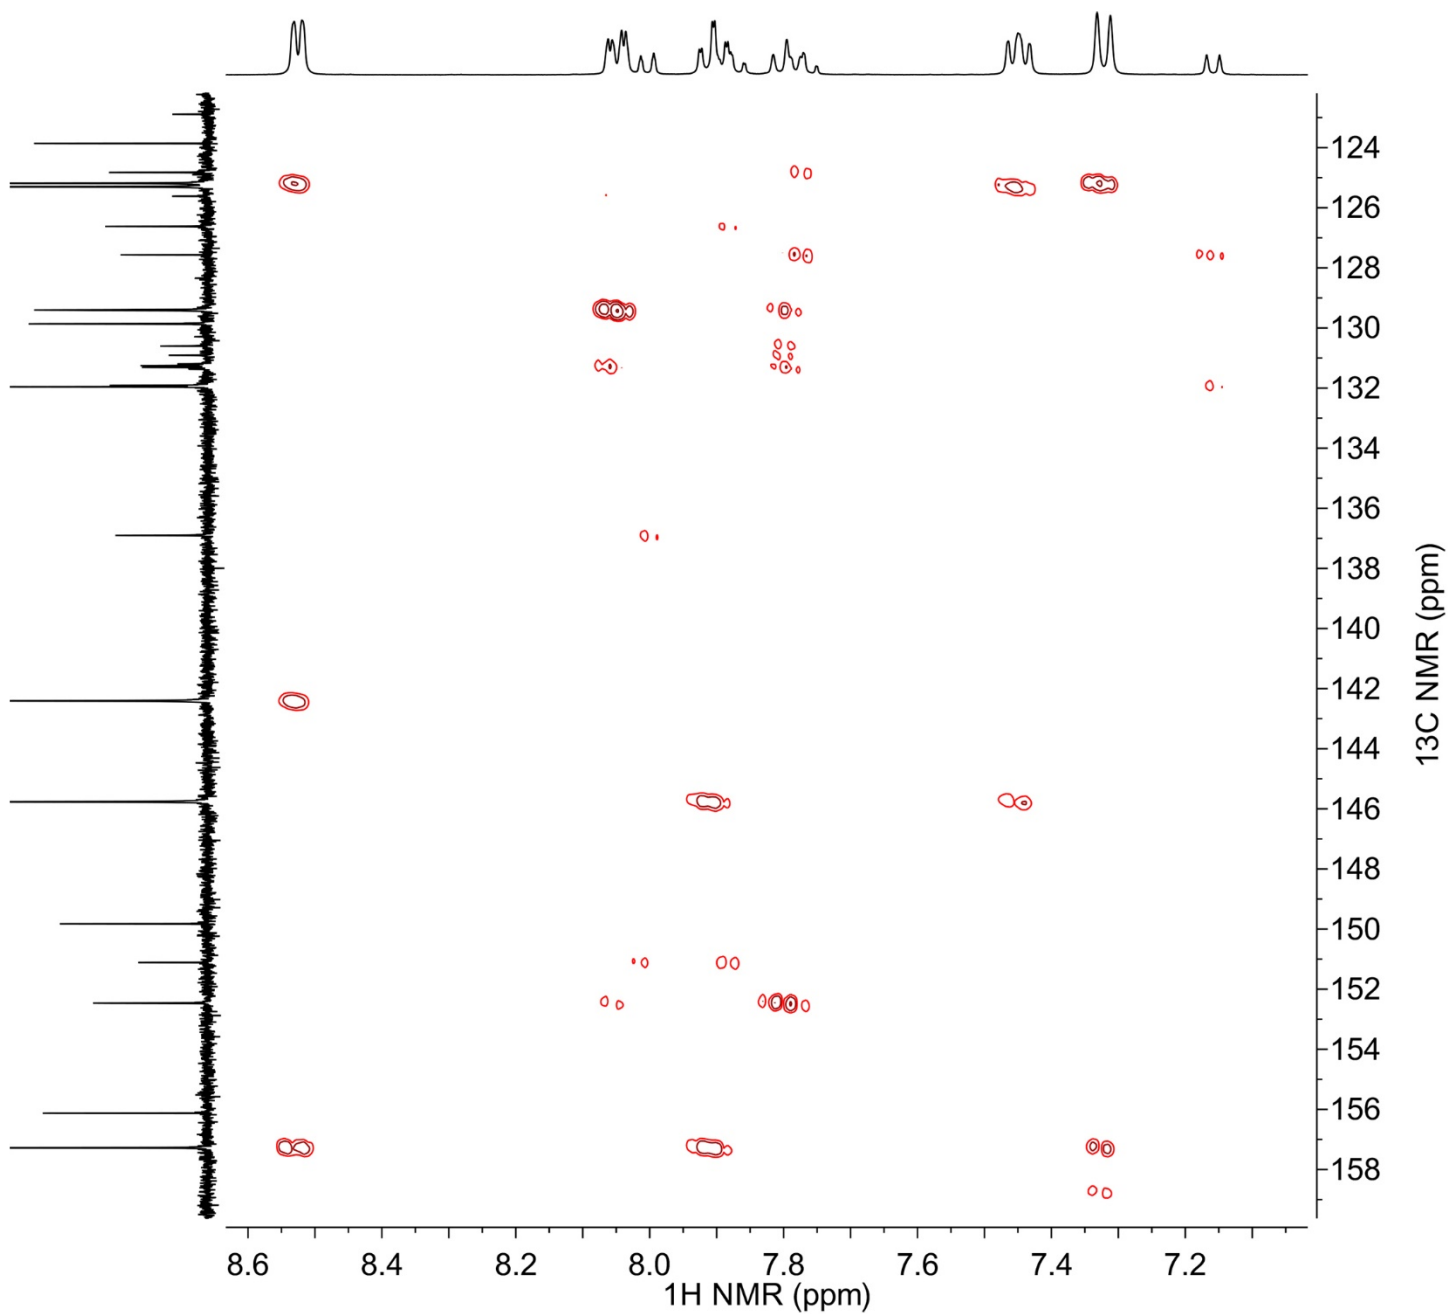

**Figure S104.** Expansion of high-resolution  $^1\text{H}$ - $^{13}\text{C}$  HMBC spectrum of **3** from 7.1 to 8.6 ppm ( $^1\text{H}$ ) and 122 to 160 ppm ( $^{13}\text{C}$ ).

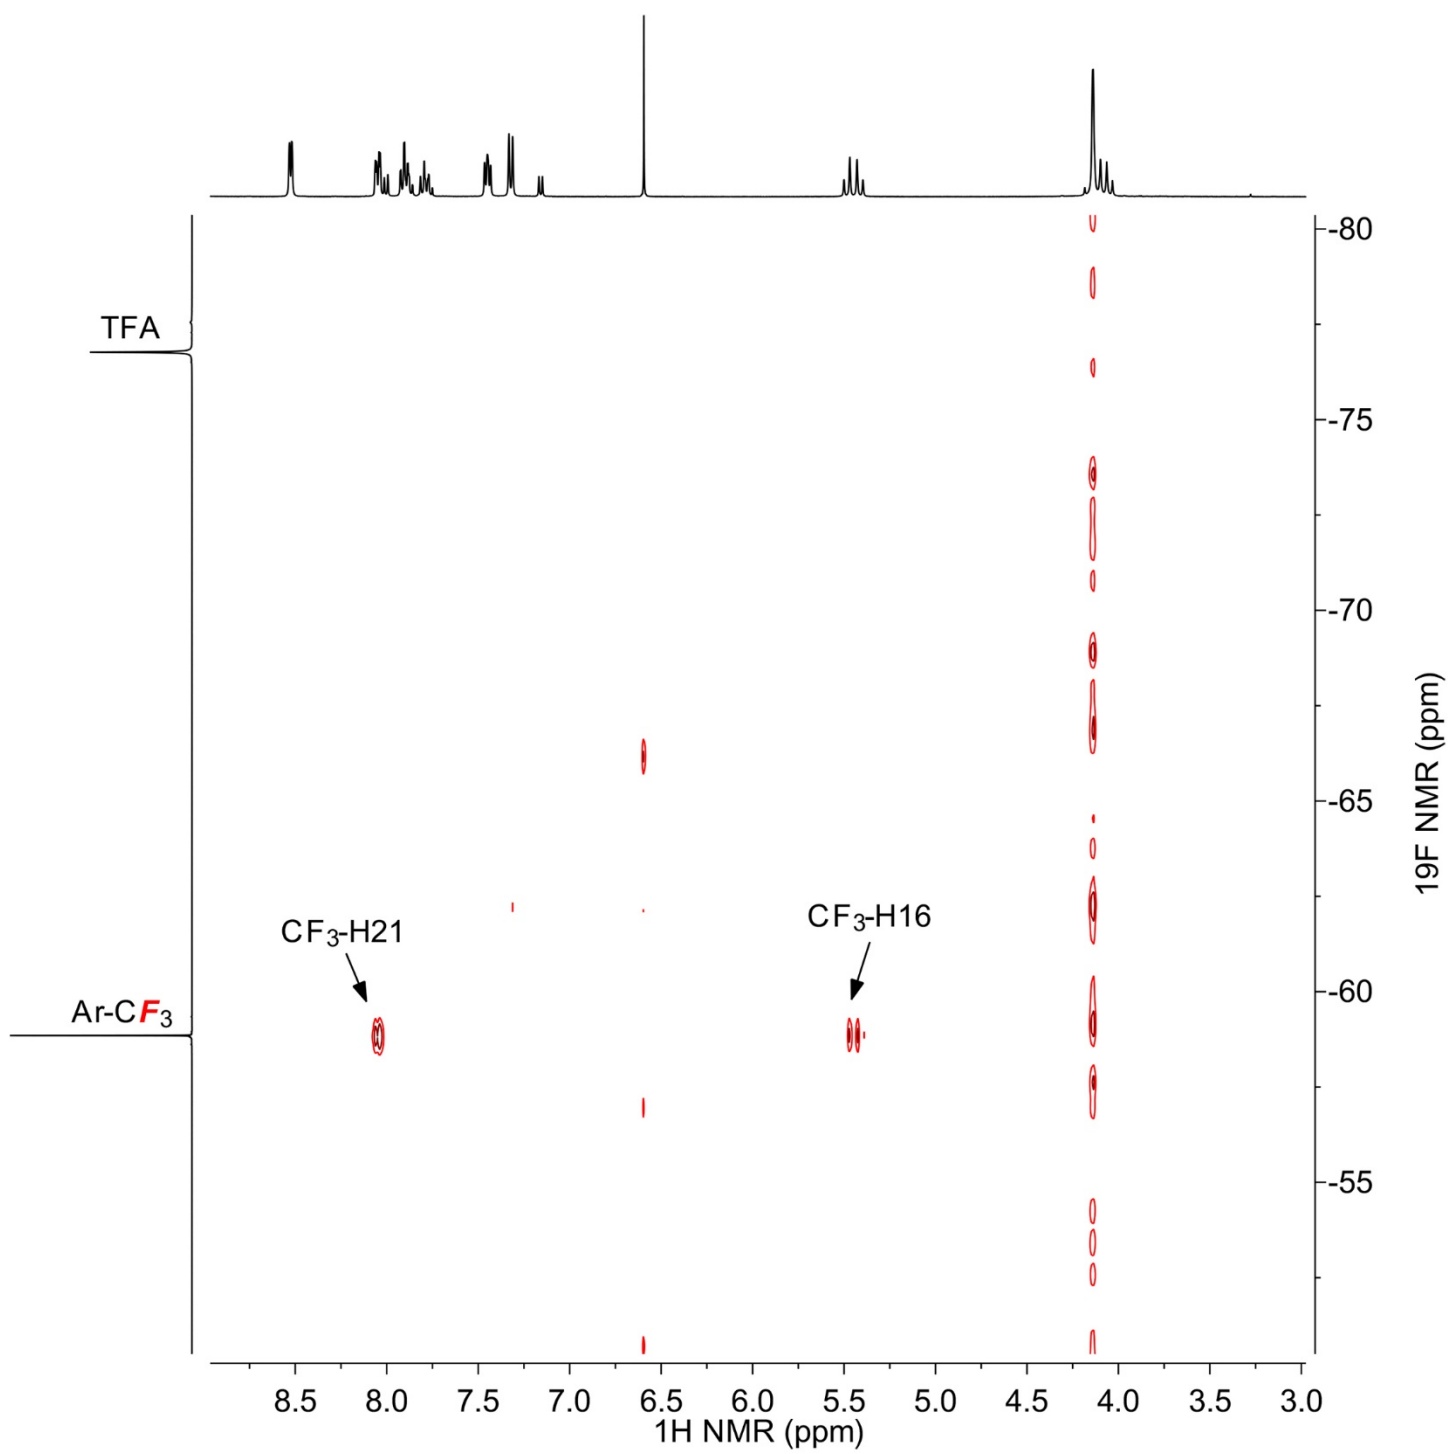

Figure S105.  $^1\text{H}$ - $^{19}\text{F}$  HOESY spectrum of **3**.

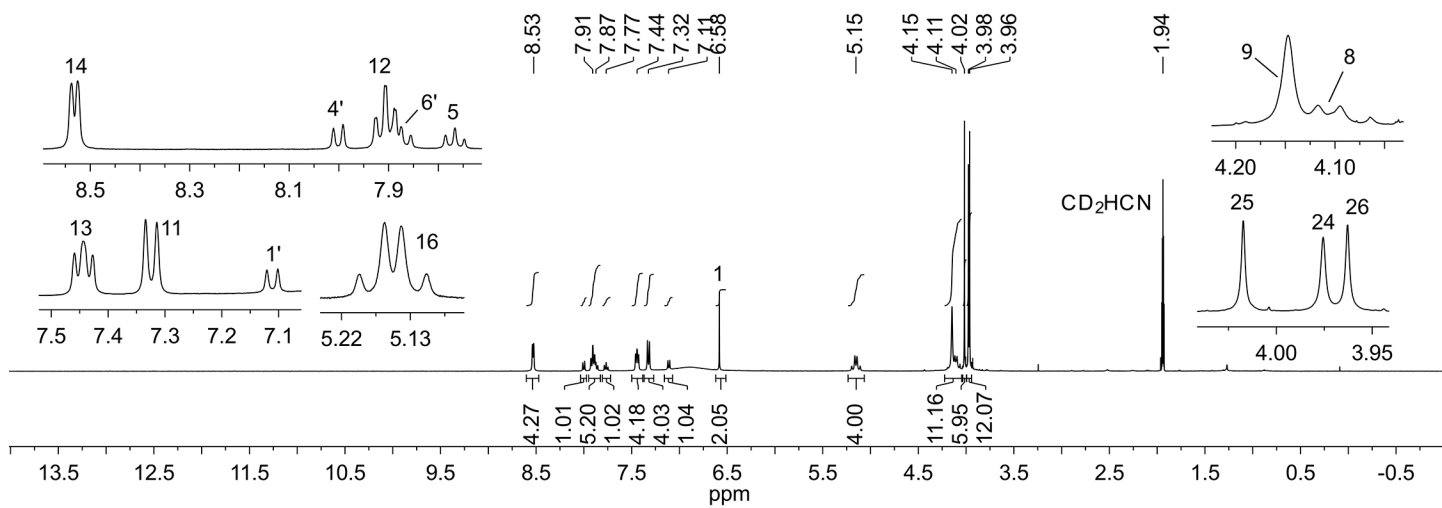

Figure S106.  $^1\text{H}$  NMR spectrum of **4**.

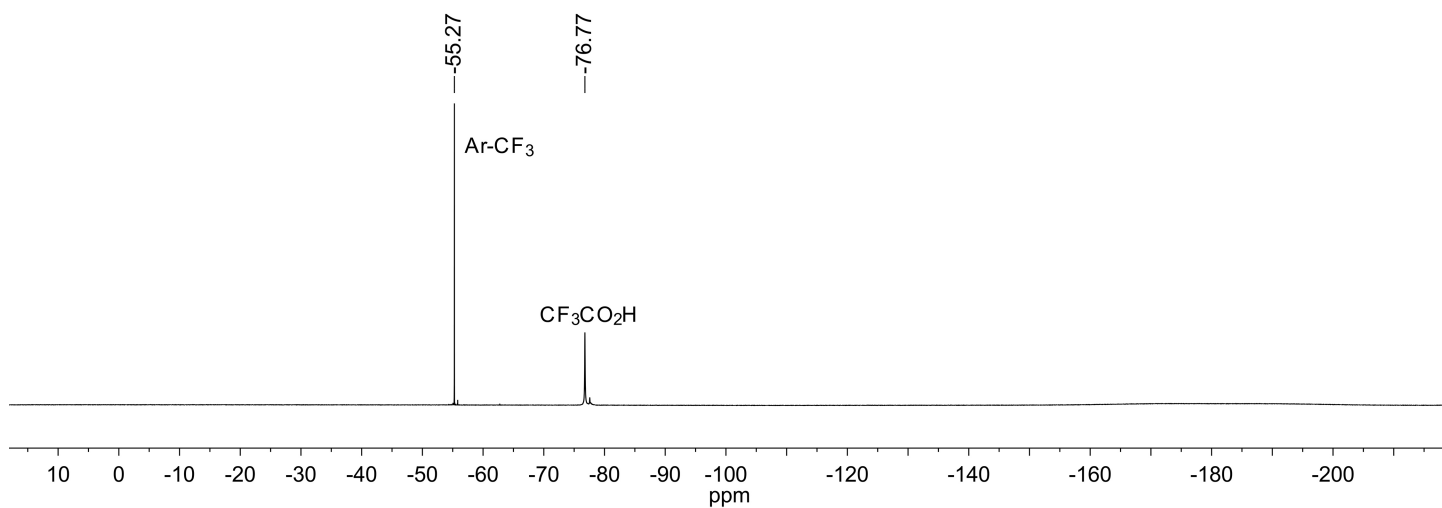

Figure S107.  $^{19}\text{F}$  NMR spectrum of **4**.

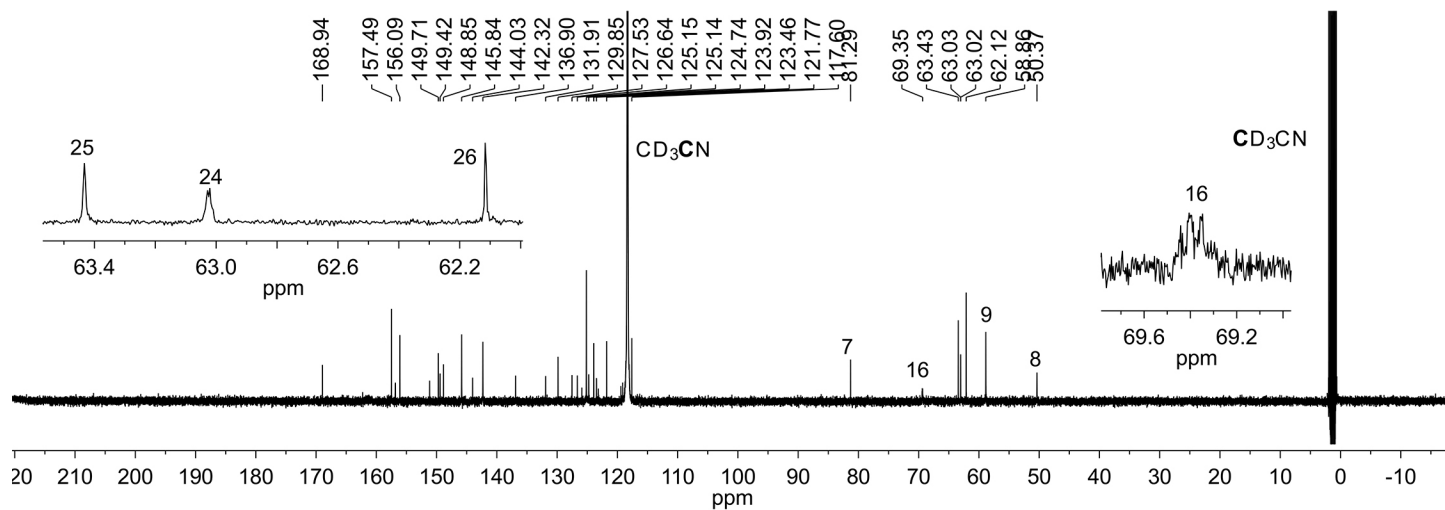

Figure S108.  $^{13}\text{C}\{^1\text{H}\}$  NMR spectrum of **4**.

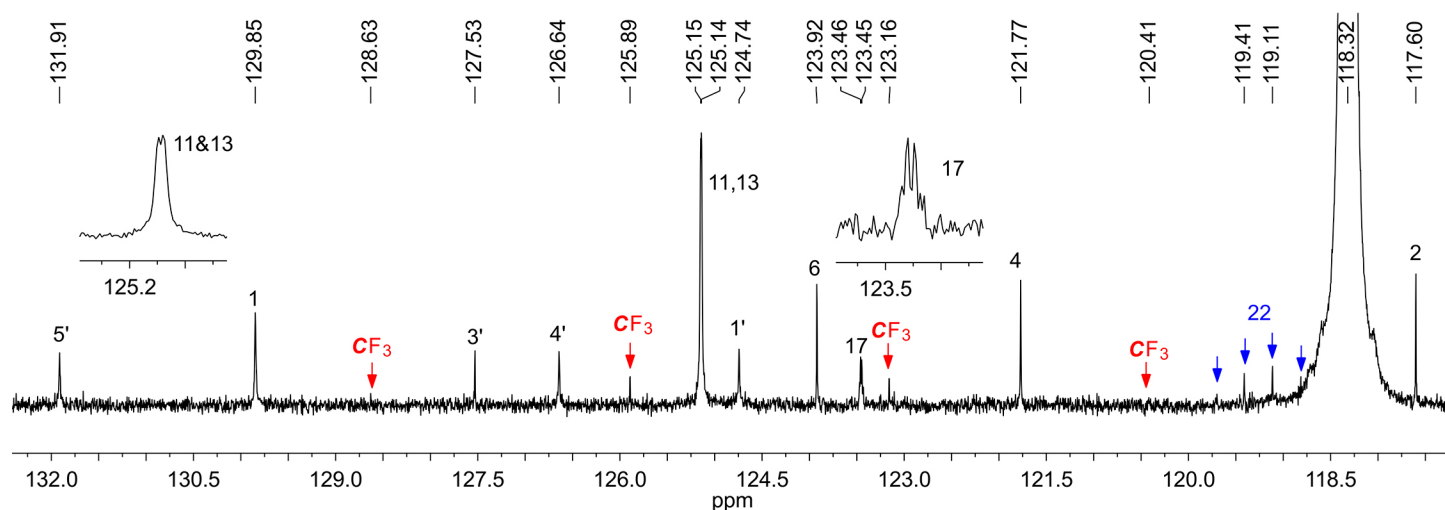

Figure S109. Expansion of  $^{13}\text{C}\{^1\text{H}\}$  NMR spectrum of **4** from 117 to 132 ppm.

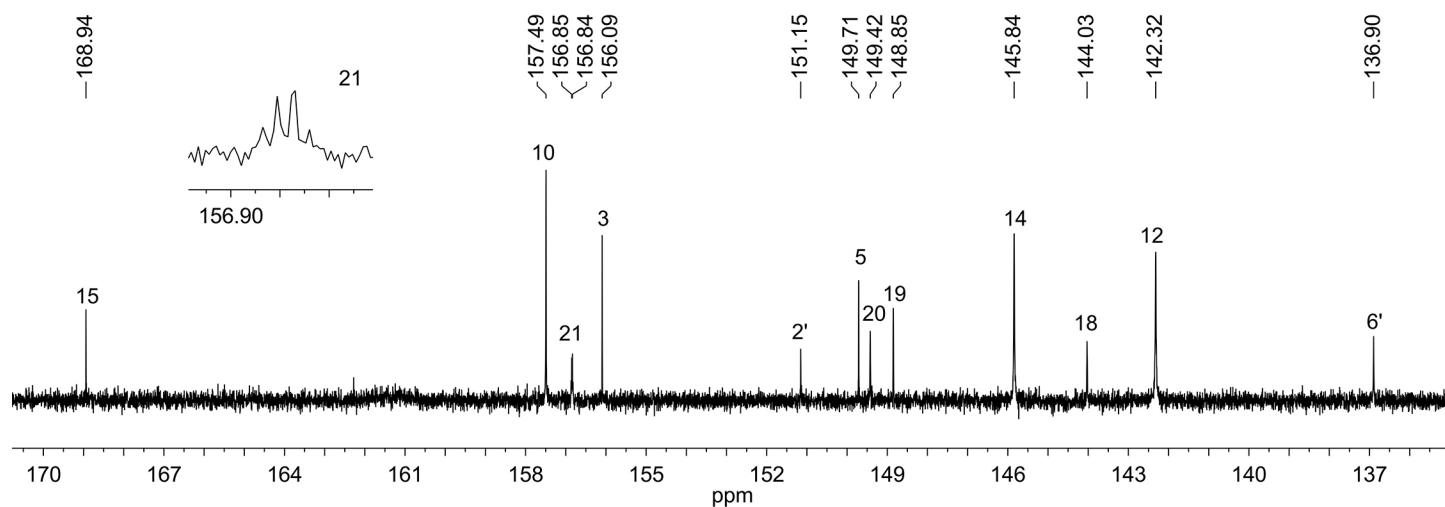

Figure S110. Expansion of  $^{13}\text{C}\{^1\text{H}\}$  NMR spectrum of **4** from 135 to 171 ppm.

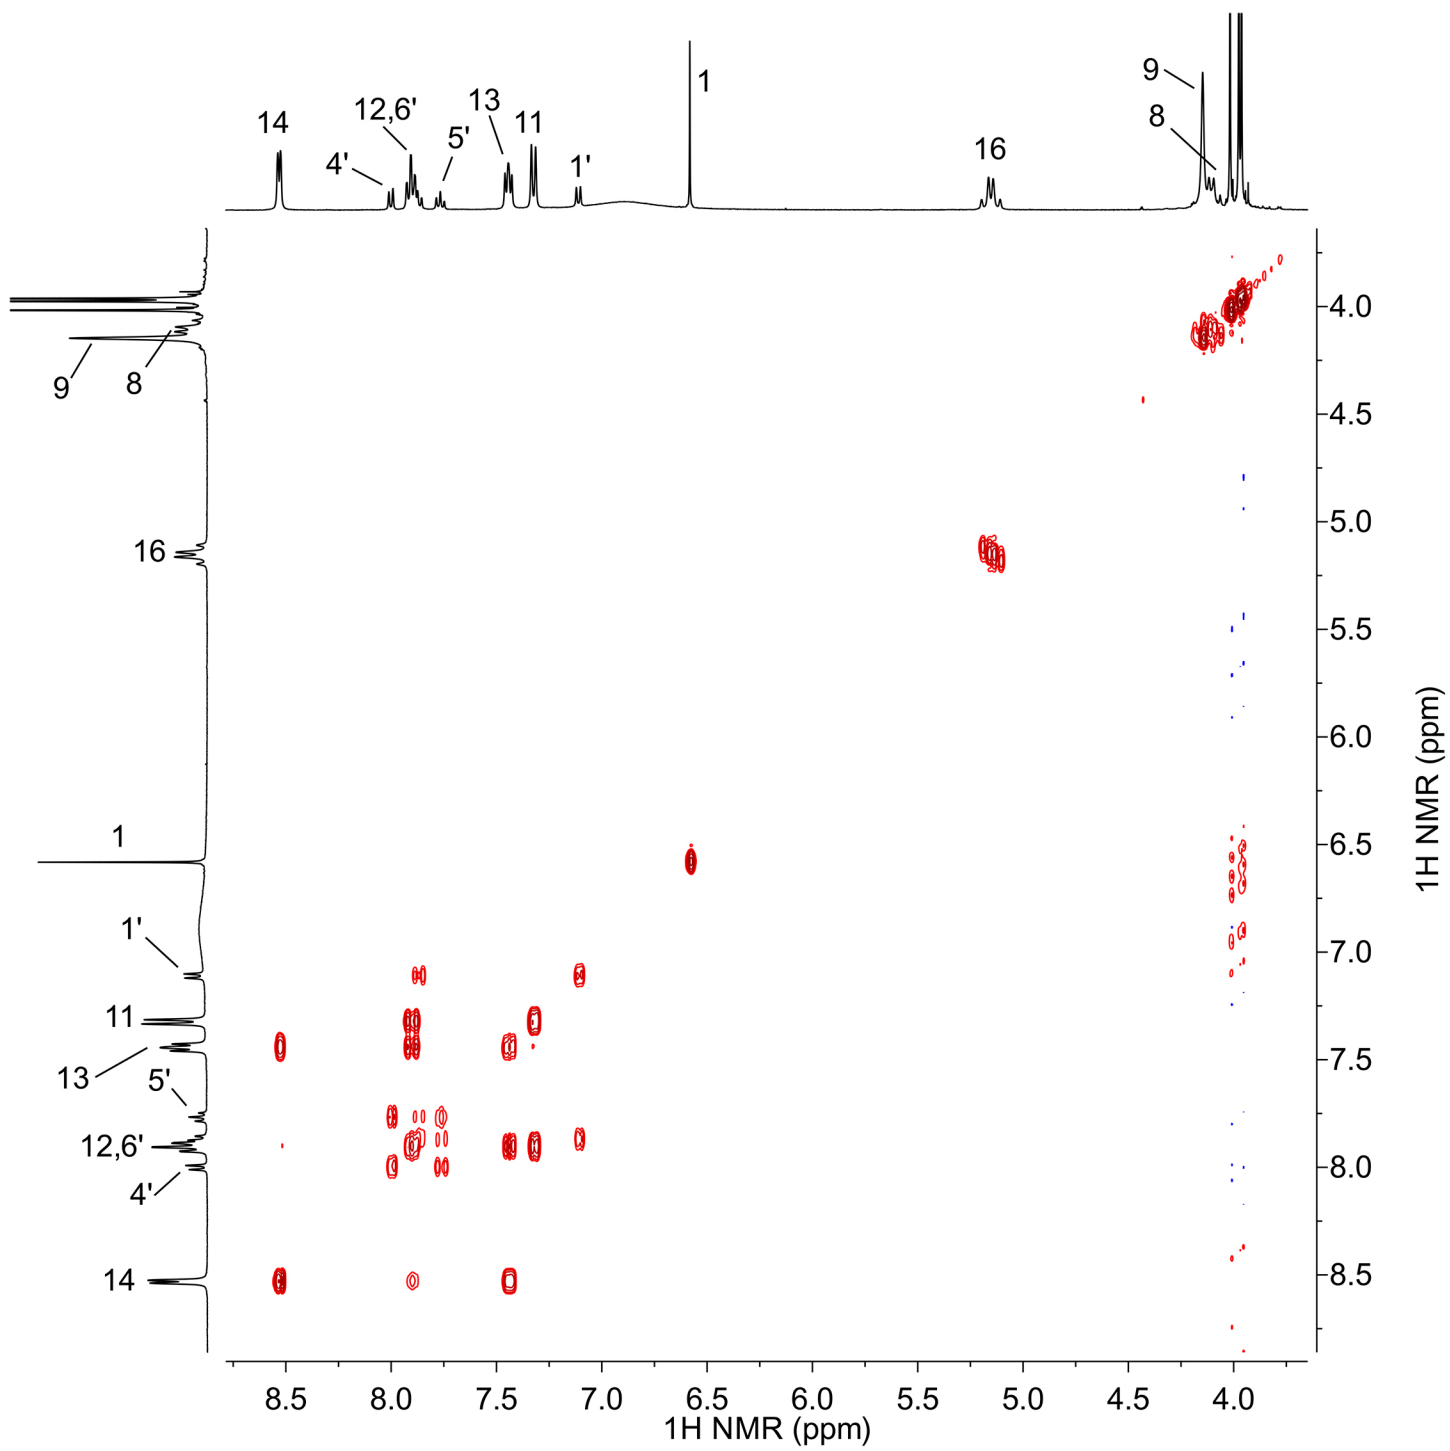

Figure S111.  $^1\text{H}$ - $^1\text{H}$  COSY spectrum of **4**.

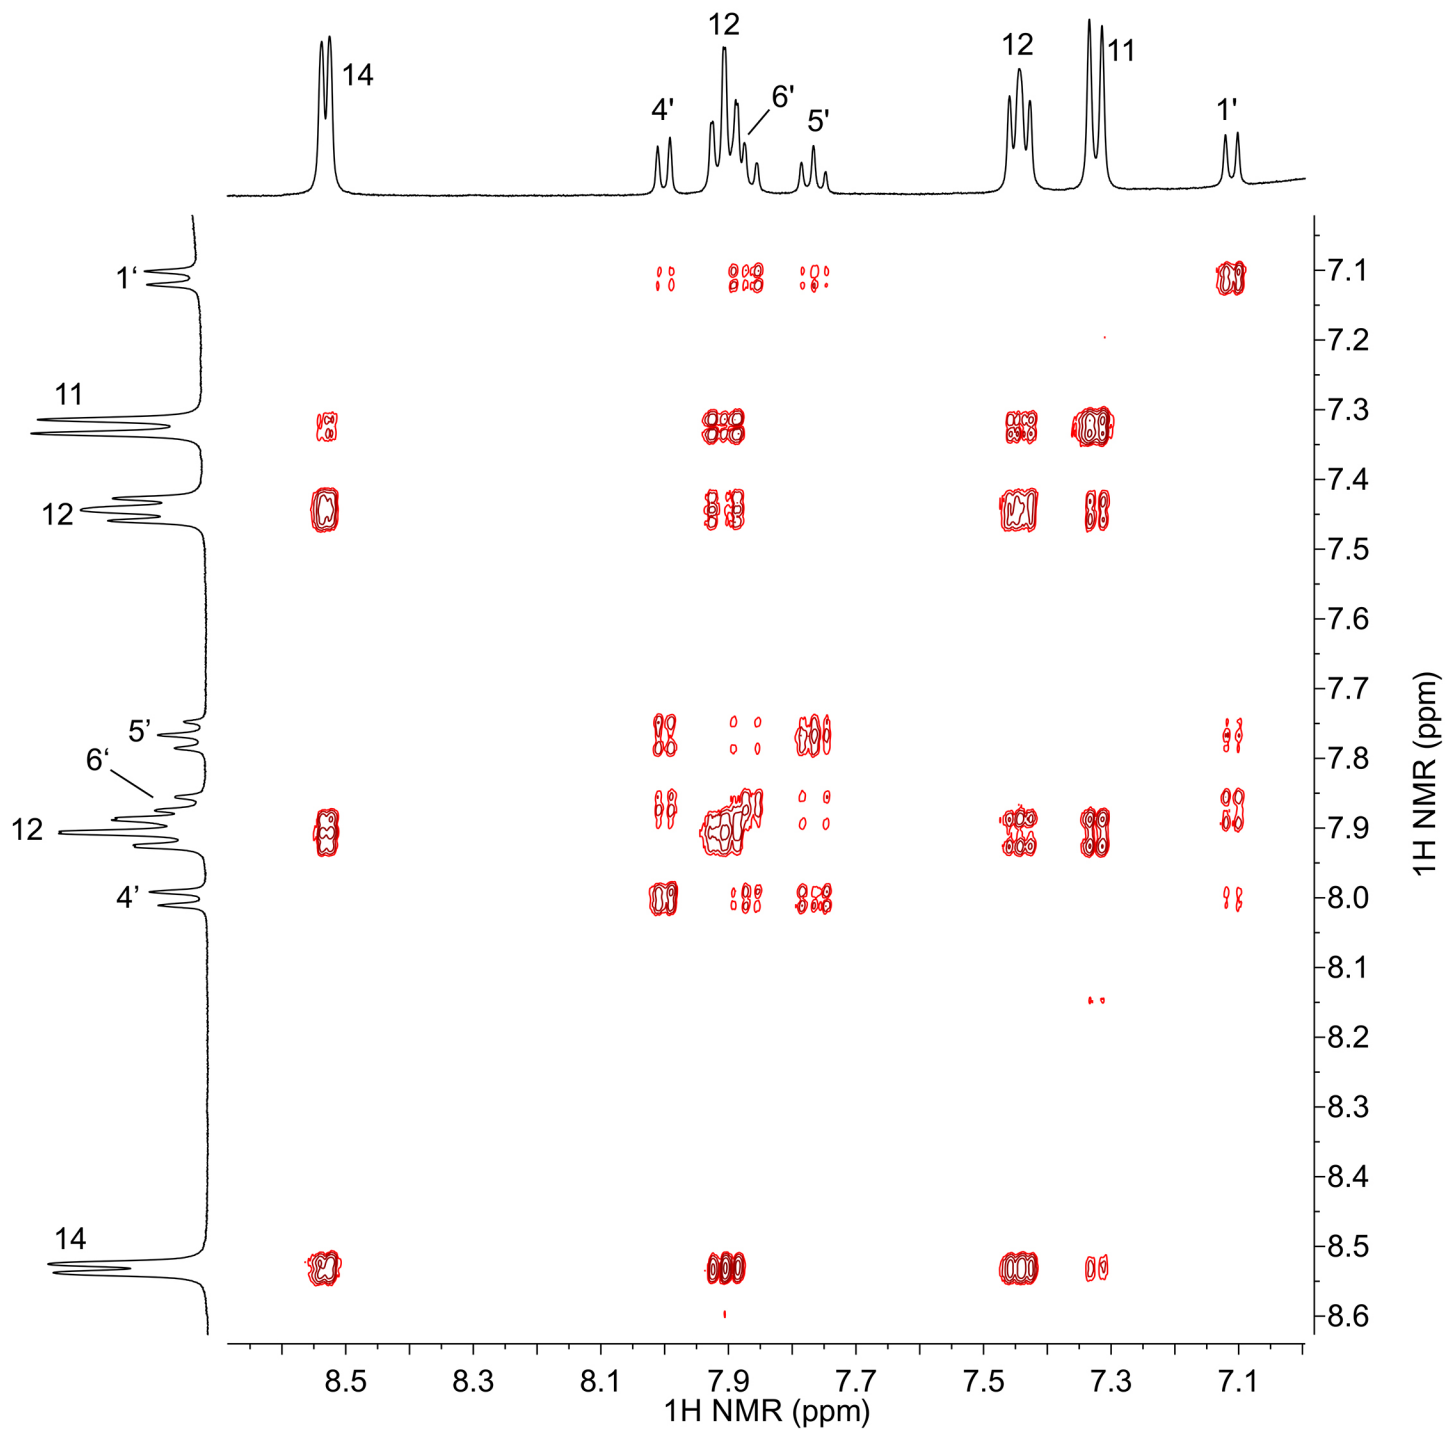

Figure S112. Expansion of  $^1\text{H}$ - $^1\text{H}$  COSY spectrum of **4**.

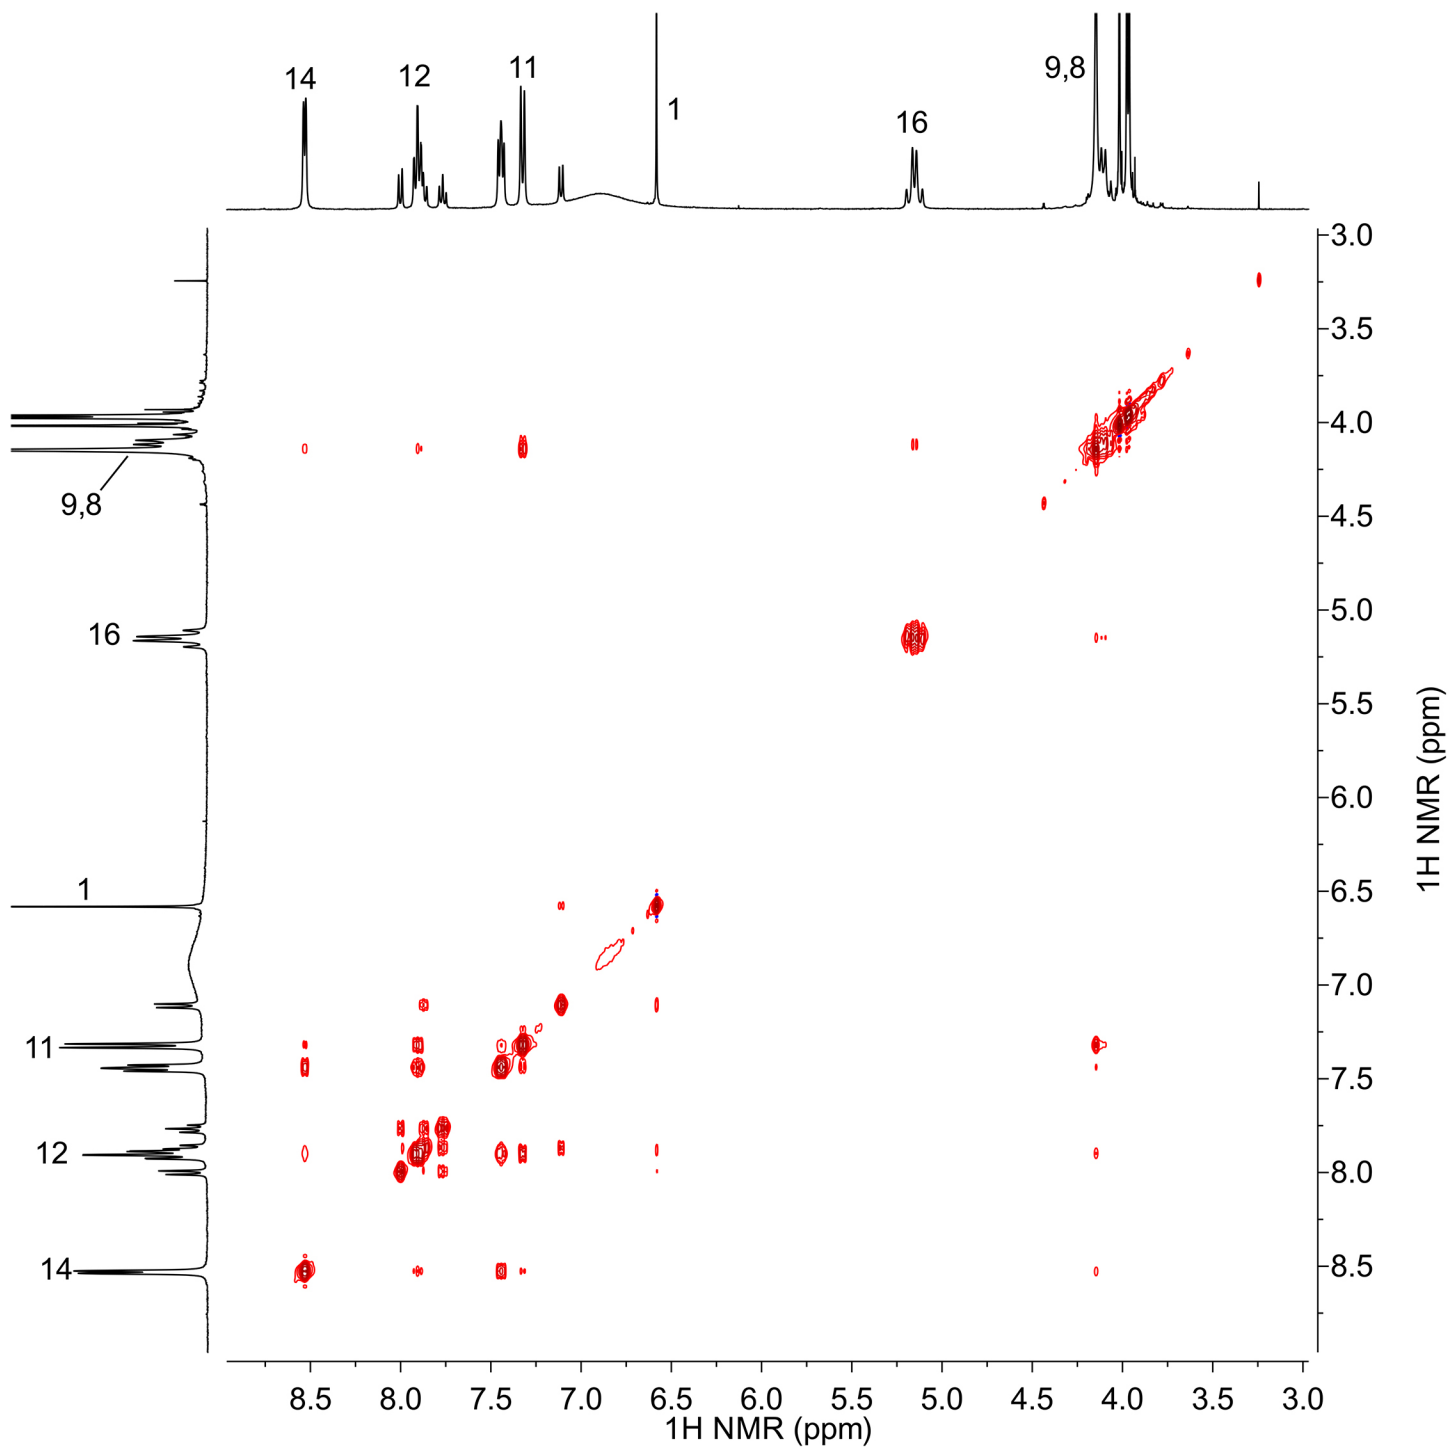

**Figure S113.**  $^1\text{H}$ - $^1\text{H}$  NOESY spectrum of **4**.

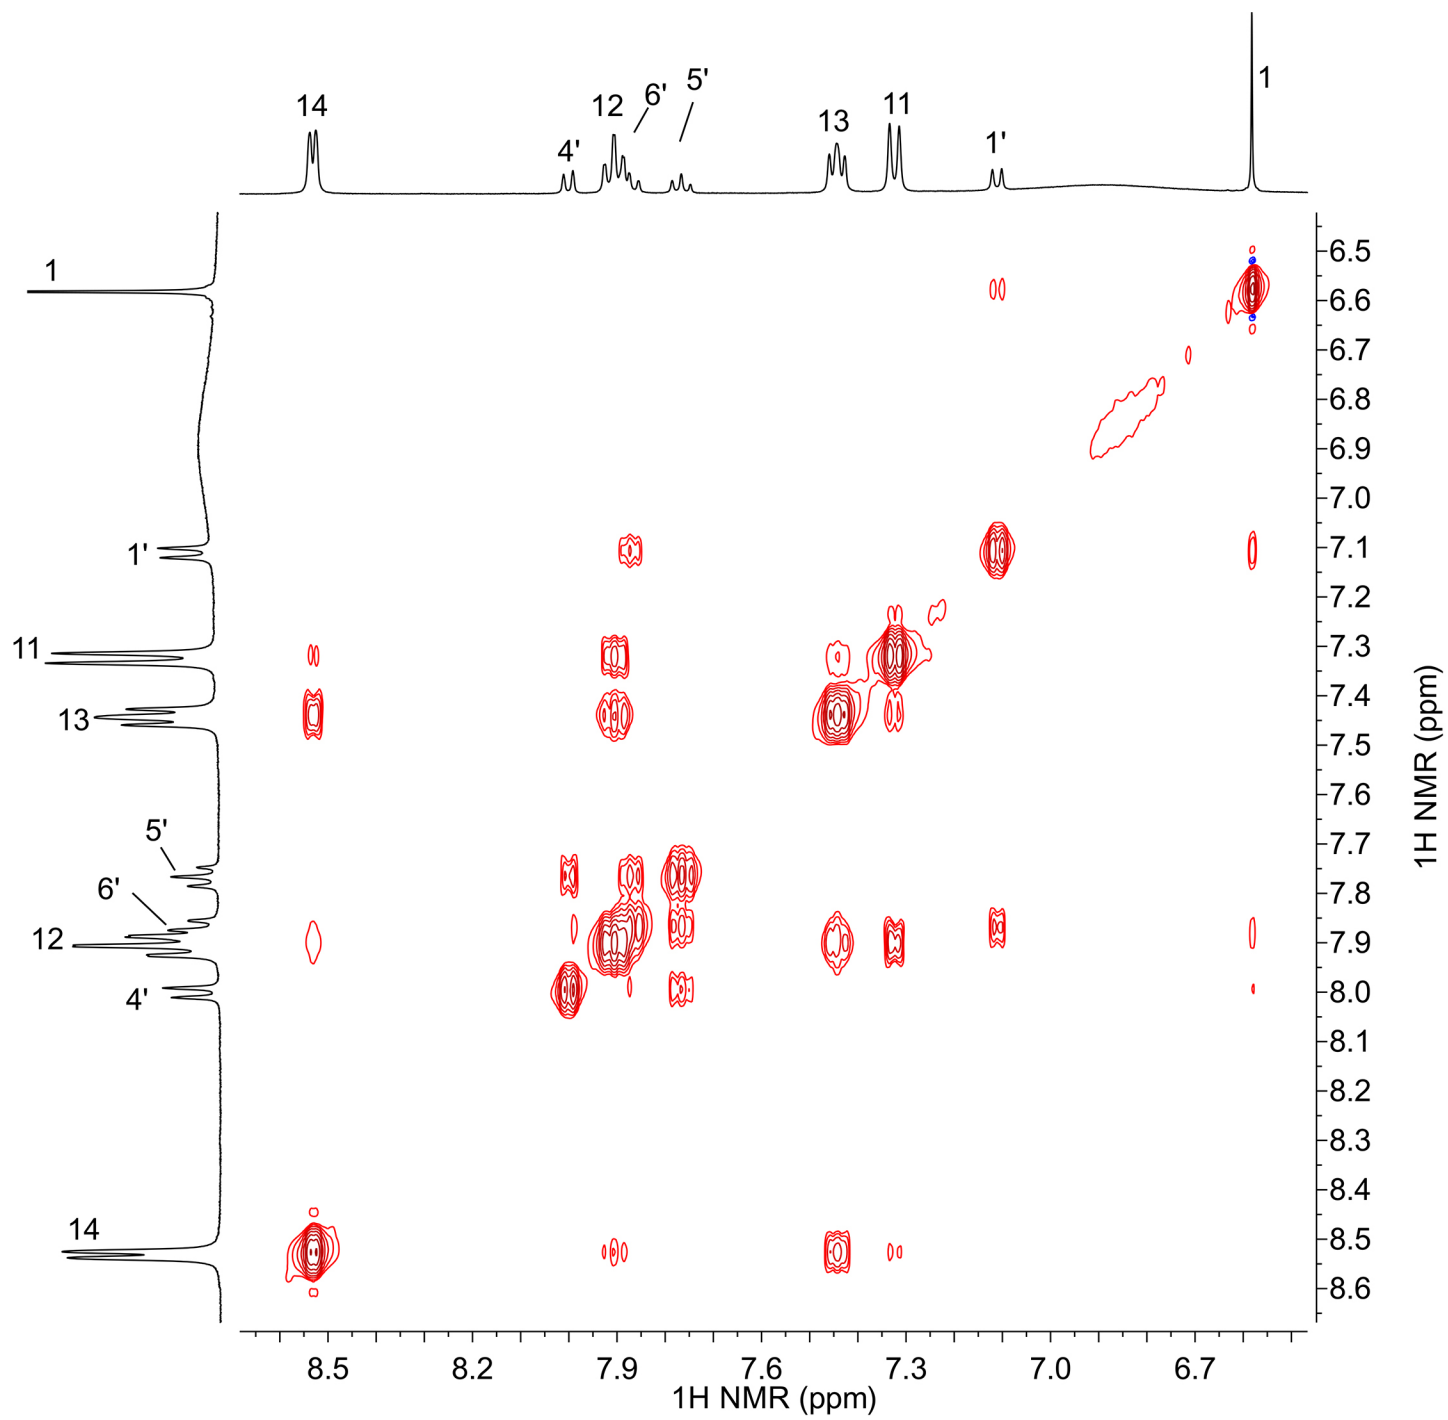

Figure S114. Expansion of  $^1\text{H}$ - $^1\text{H}$  NOESY spectrum of **4**.



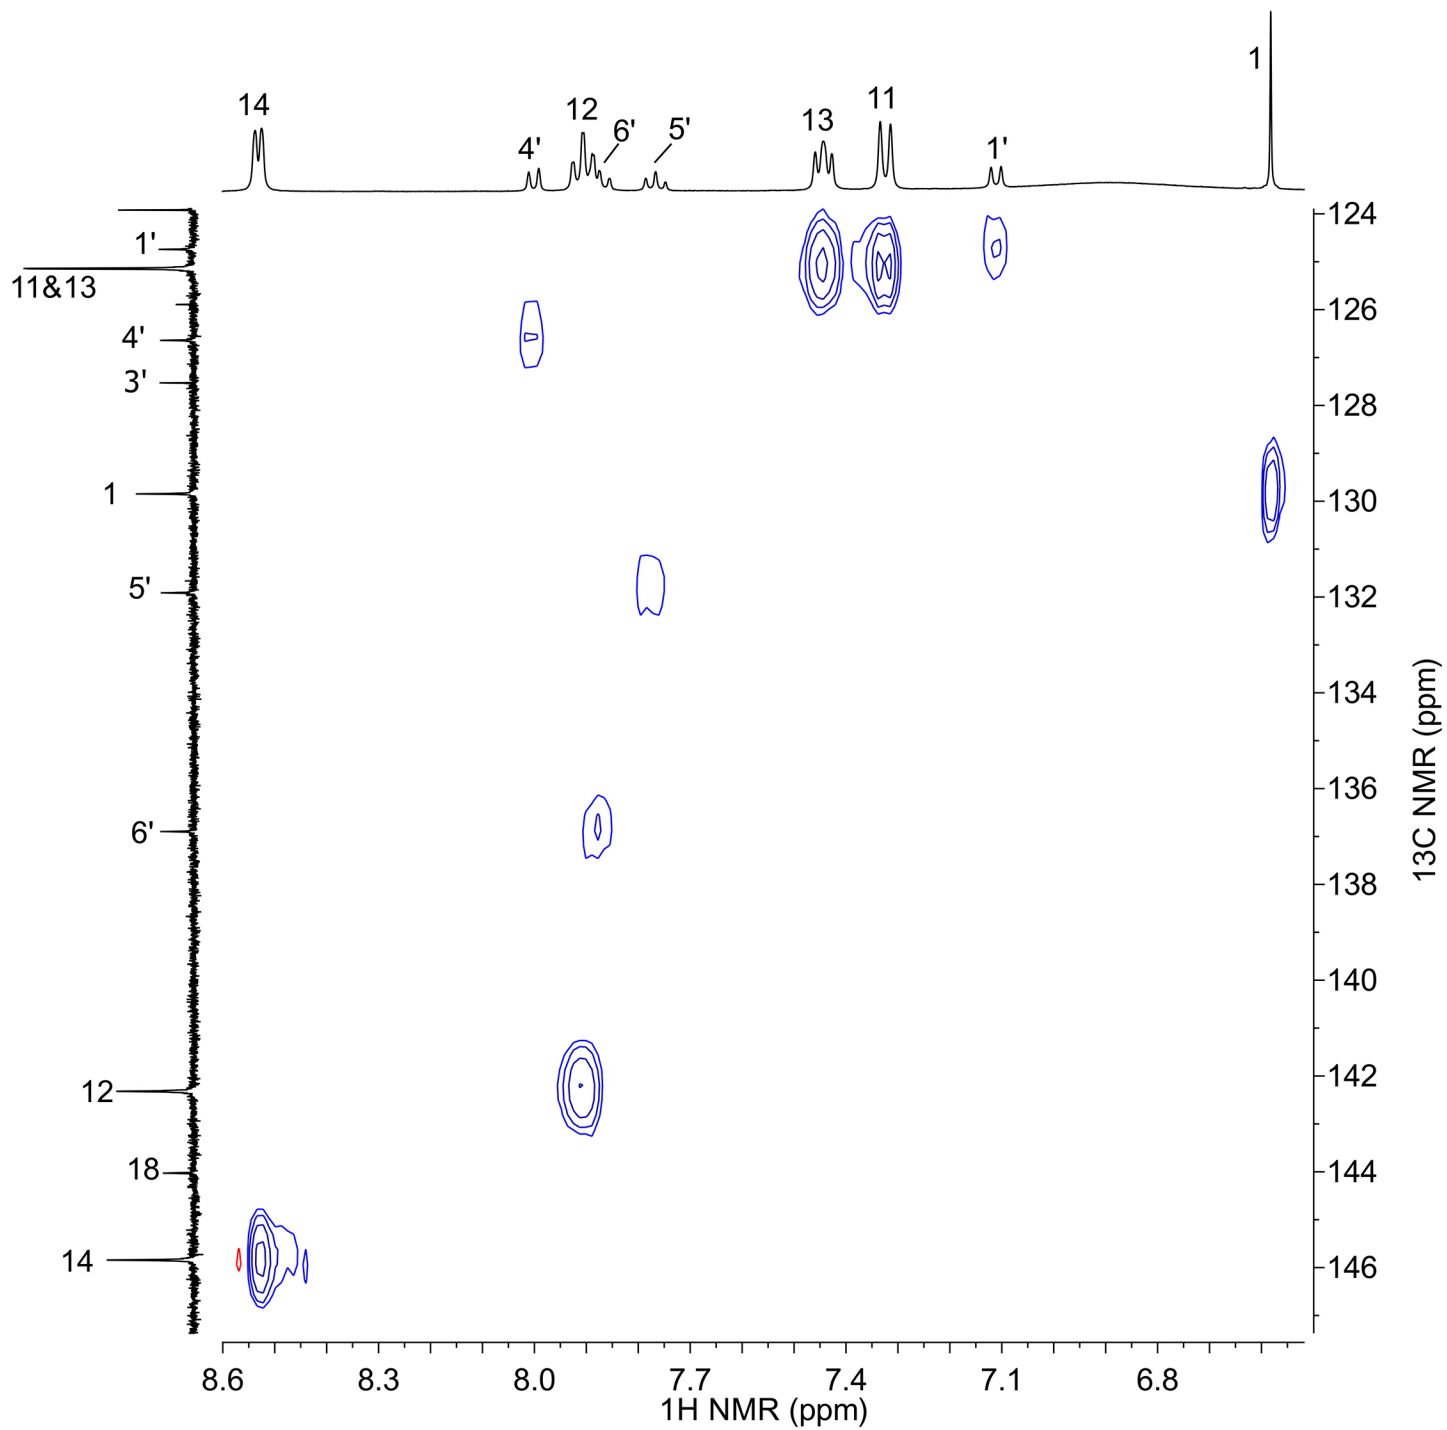

**Figure S115.** Expansion of  $^1\text{H}$ - $^{13}\text{C}$  HSQC spectrum of **4** from 6.5 to 8.6 ppm ( $^1\text{H}$ ) and 124 to 147 ppm ( $^{13}\text{C}$ ).

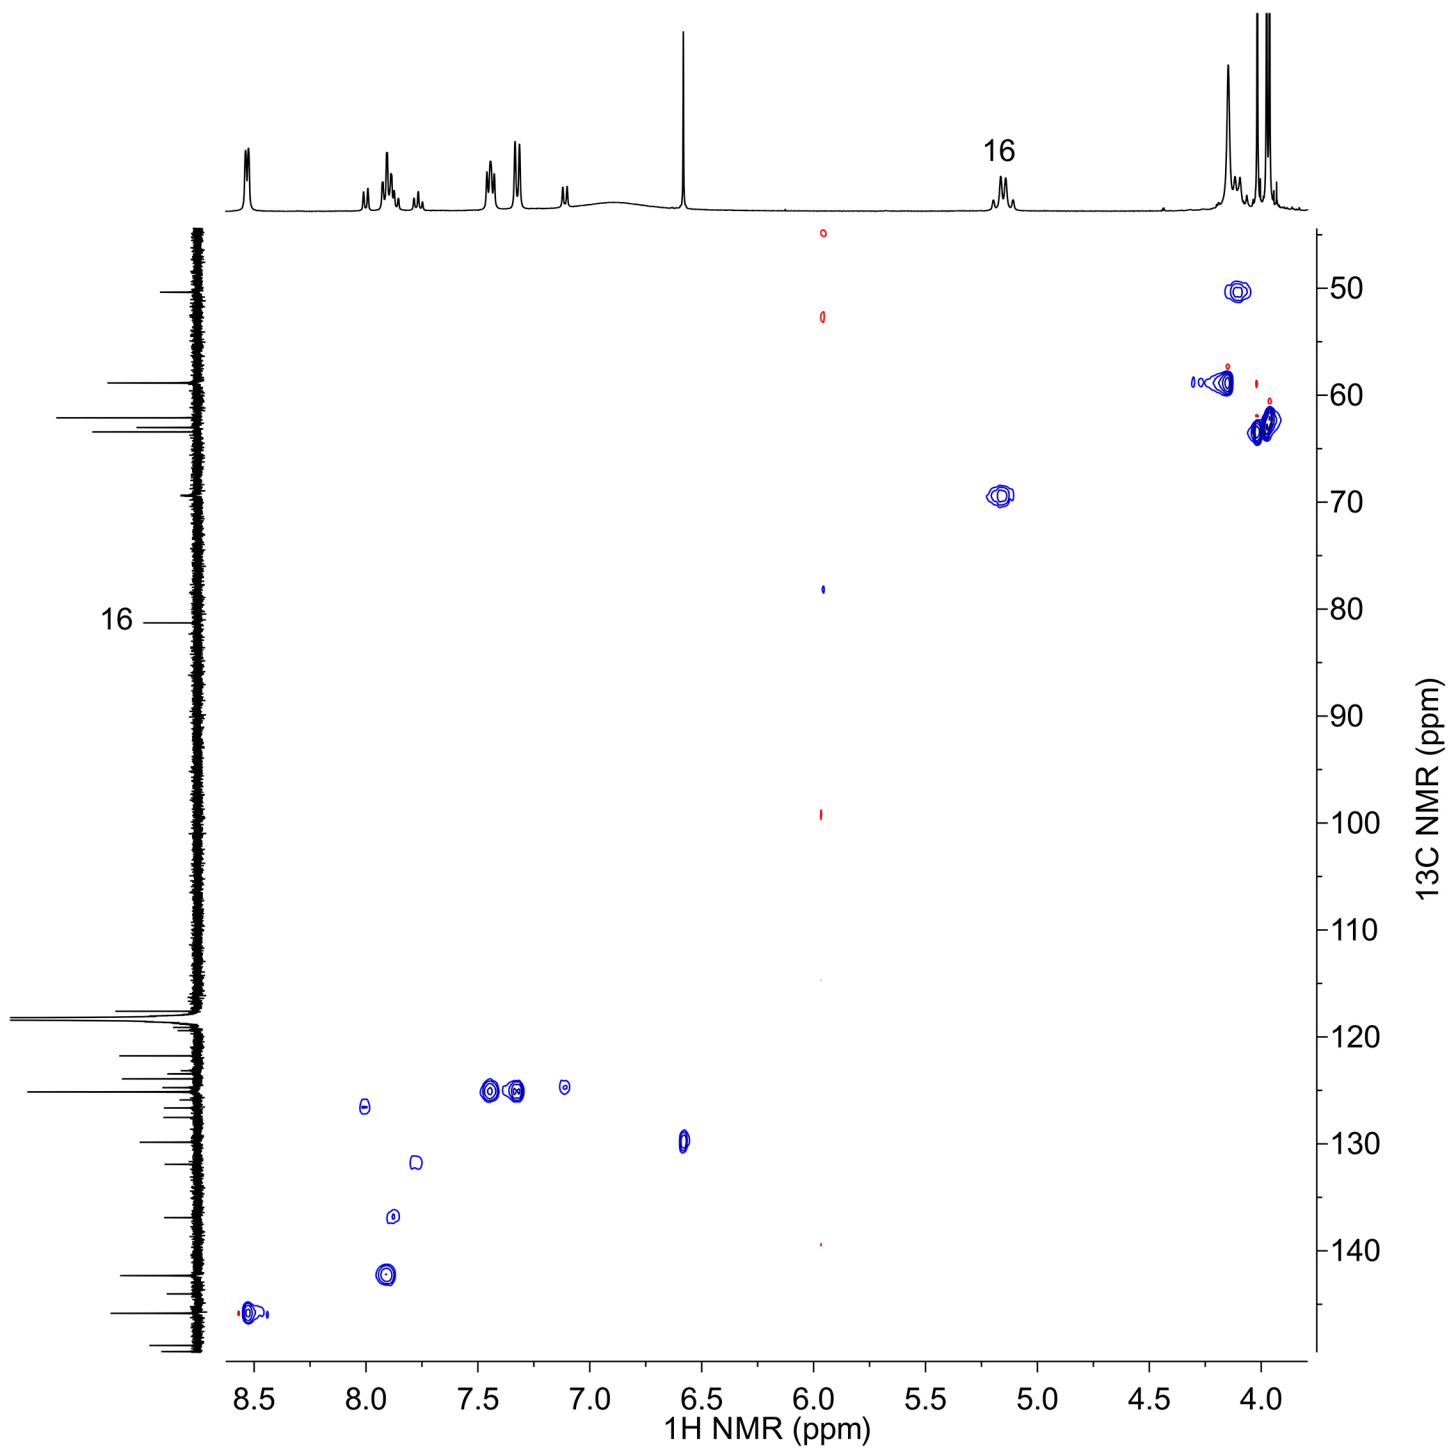

**Figure S116.** Expansion of  $^1\text{H}$ - $^{13}\text{C}$  HSQC spectrum of **4** from 3.9 to 8.6 ppm ( $^1\text{H}$ ) and 45 to 150 ppm ( $^{13}\text{C}$ ).

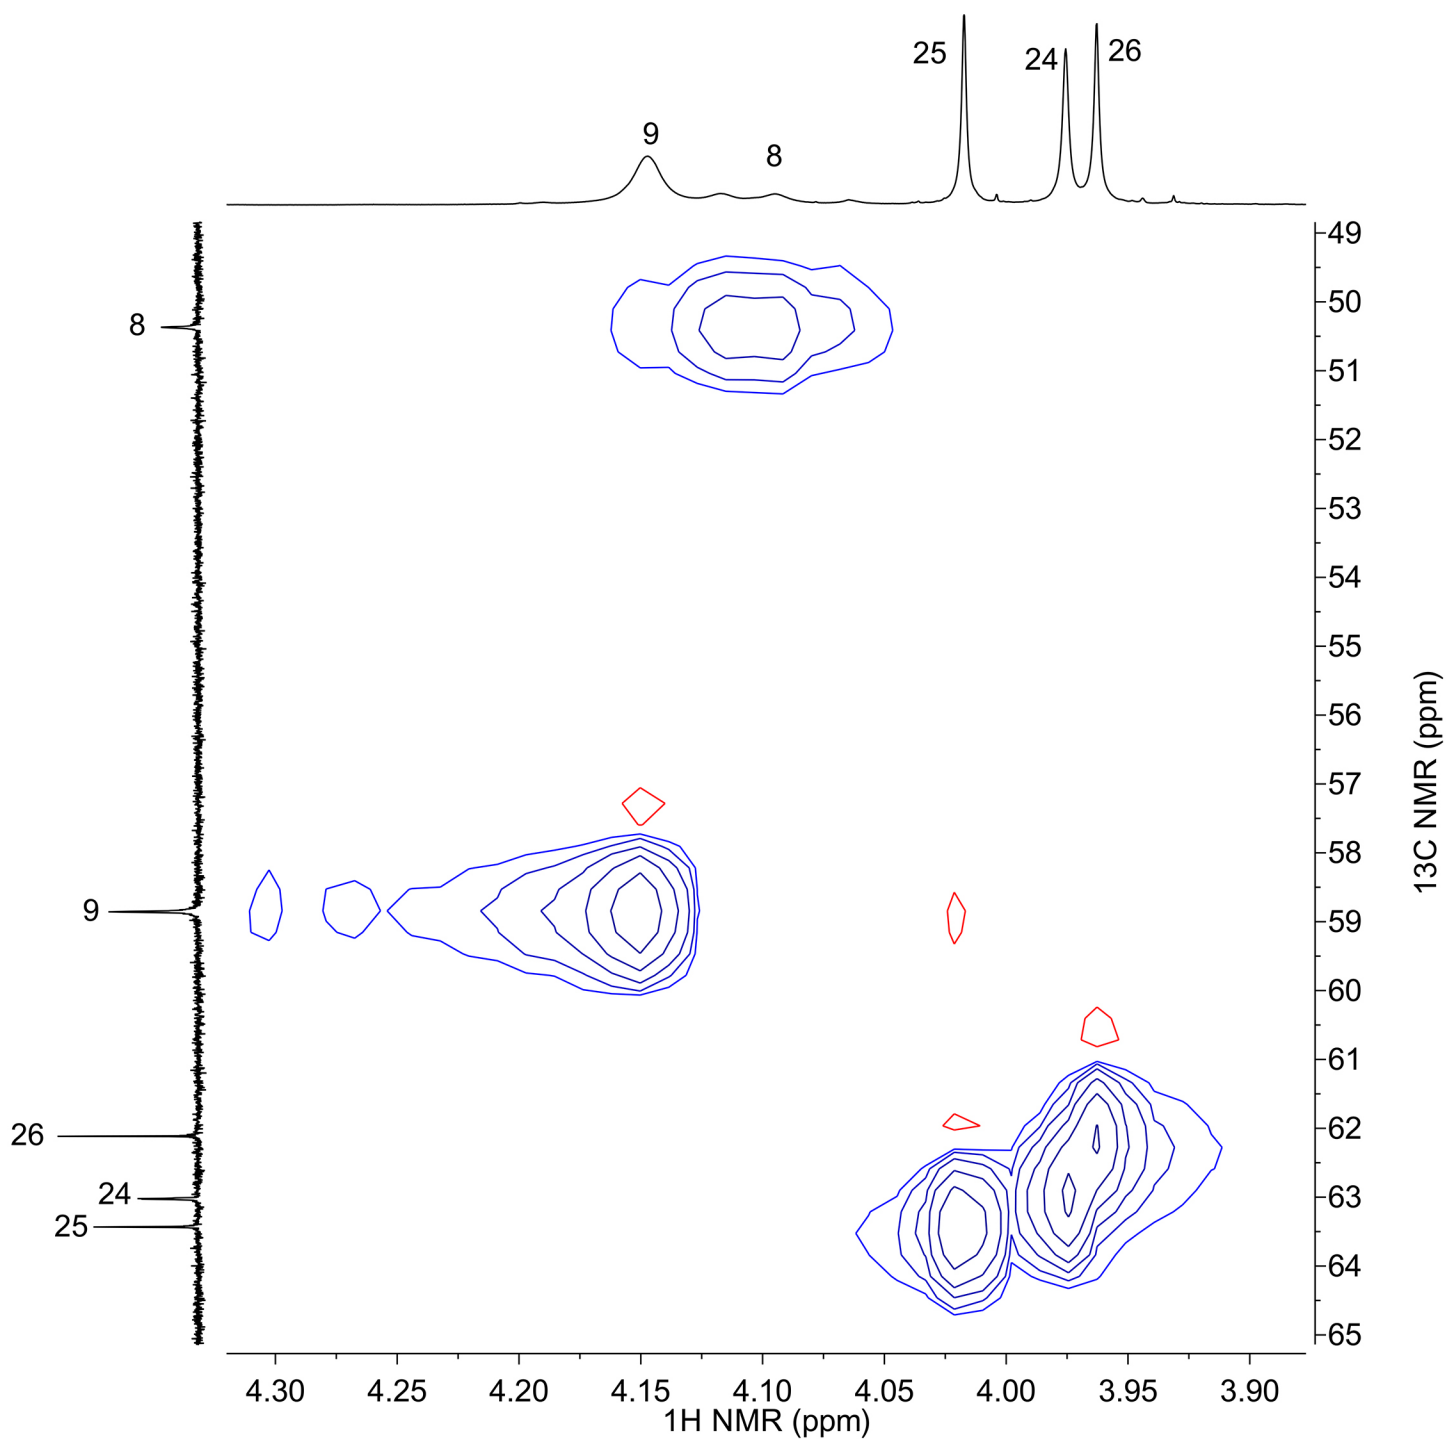

**Figure S117.** Expansion of  $^1\text{H}$ - $^{13}\text{C}$  HSQC spectrum of **4** from 3.9 to 4.3 ppm ( $^1\text{H}$ ) and 49 to 65 ppm ( $^{13}\text{C}$ ).

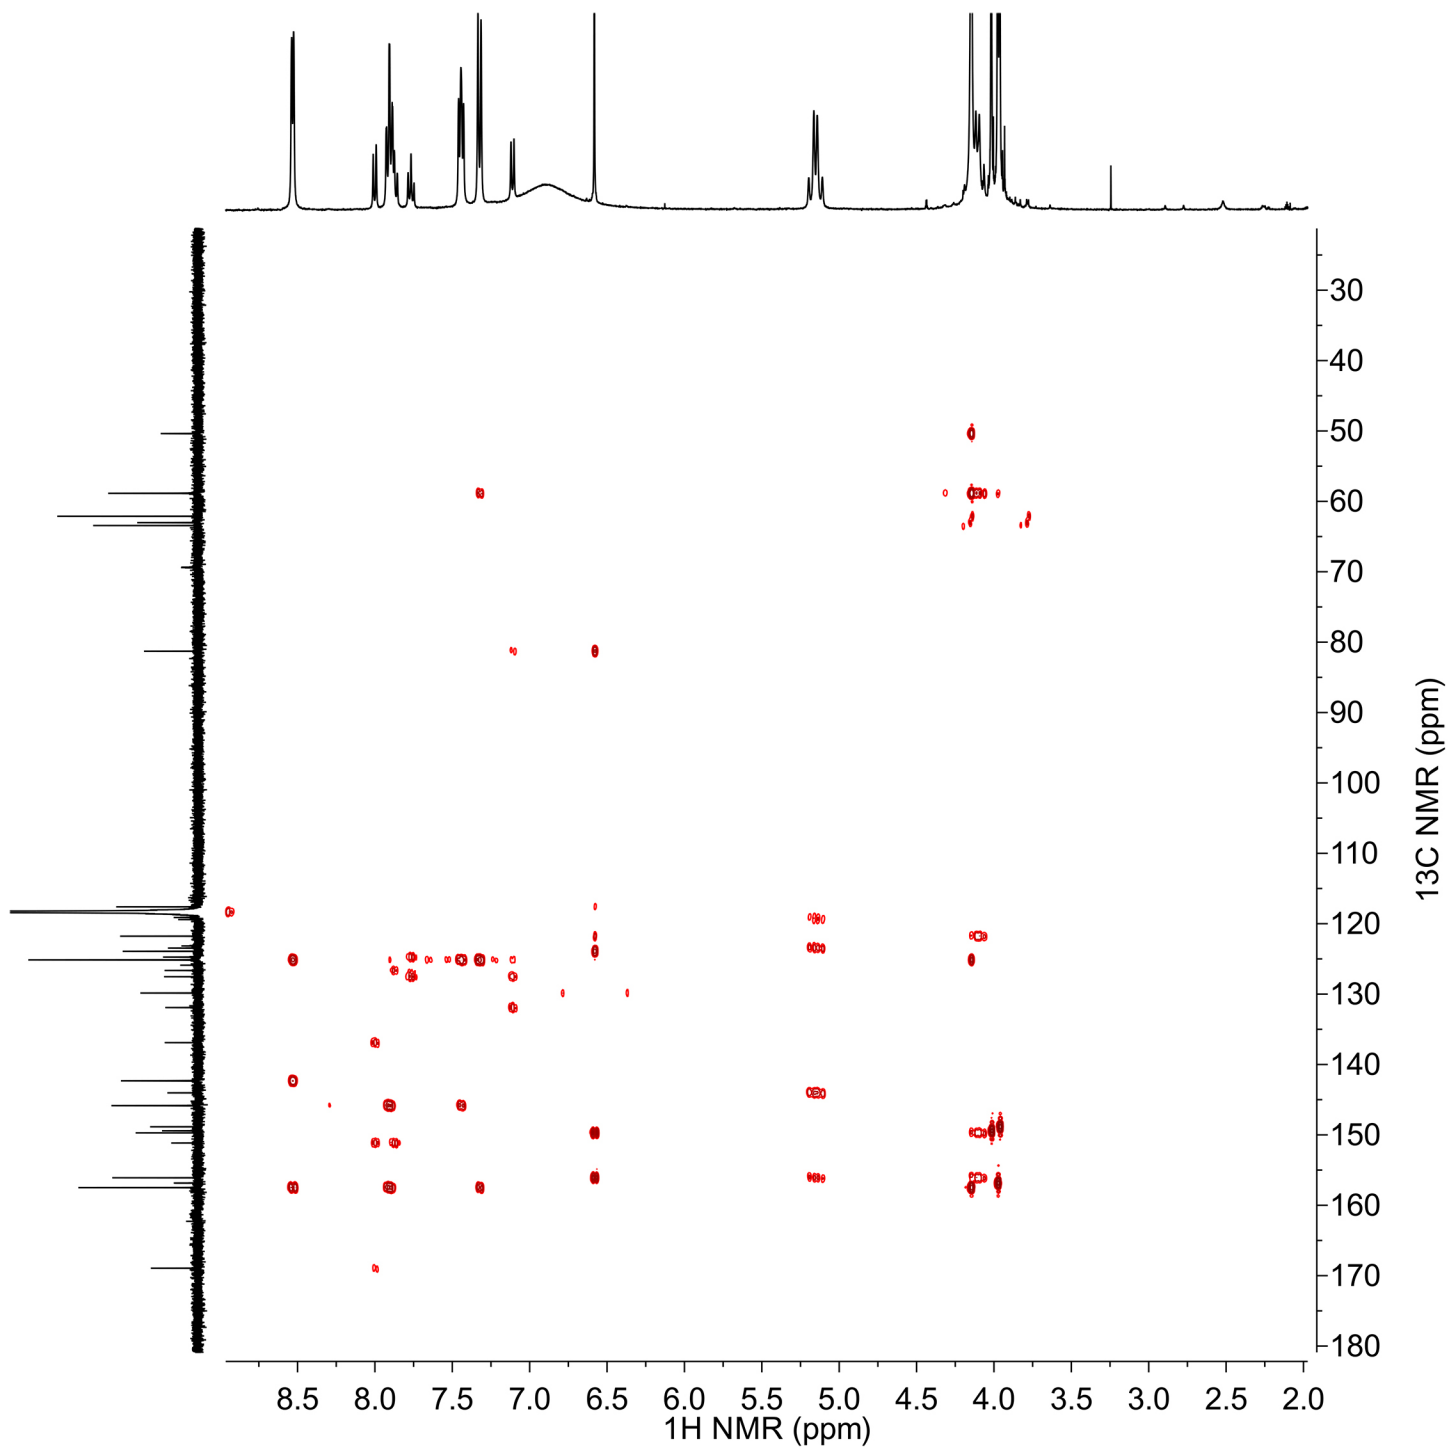

**Figure S118.**  $^1\text{H}$ - $^{13}\text{C}$  HMBC spectrum of **4**.

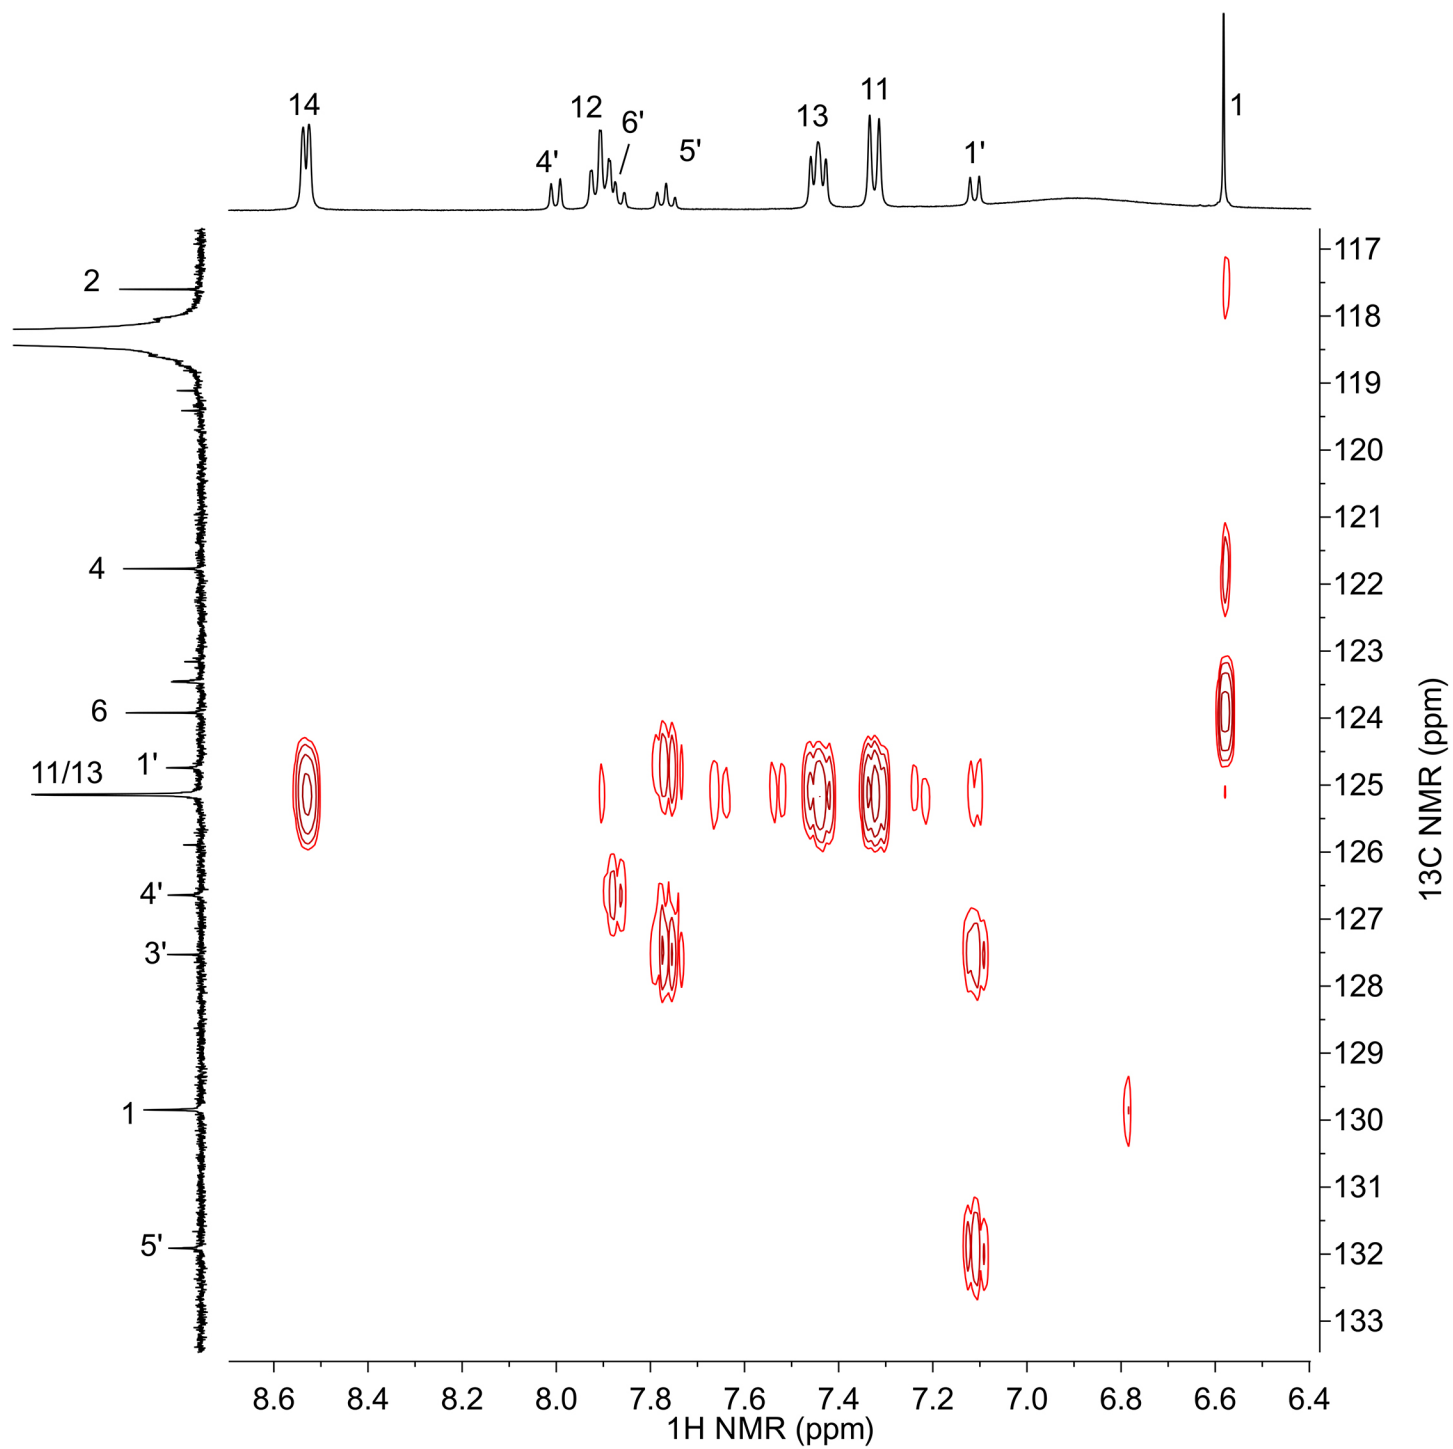

**Figure S119.** Expansion of  $^1\text{H}$ - $^{13}\text{C}$  HMBC spectrum of **4** from 6.4 to 8.6 ppm ( $^1\text{H}$ ) and 117 to 133 ppm ( $^{13}\text{C}$ ).

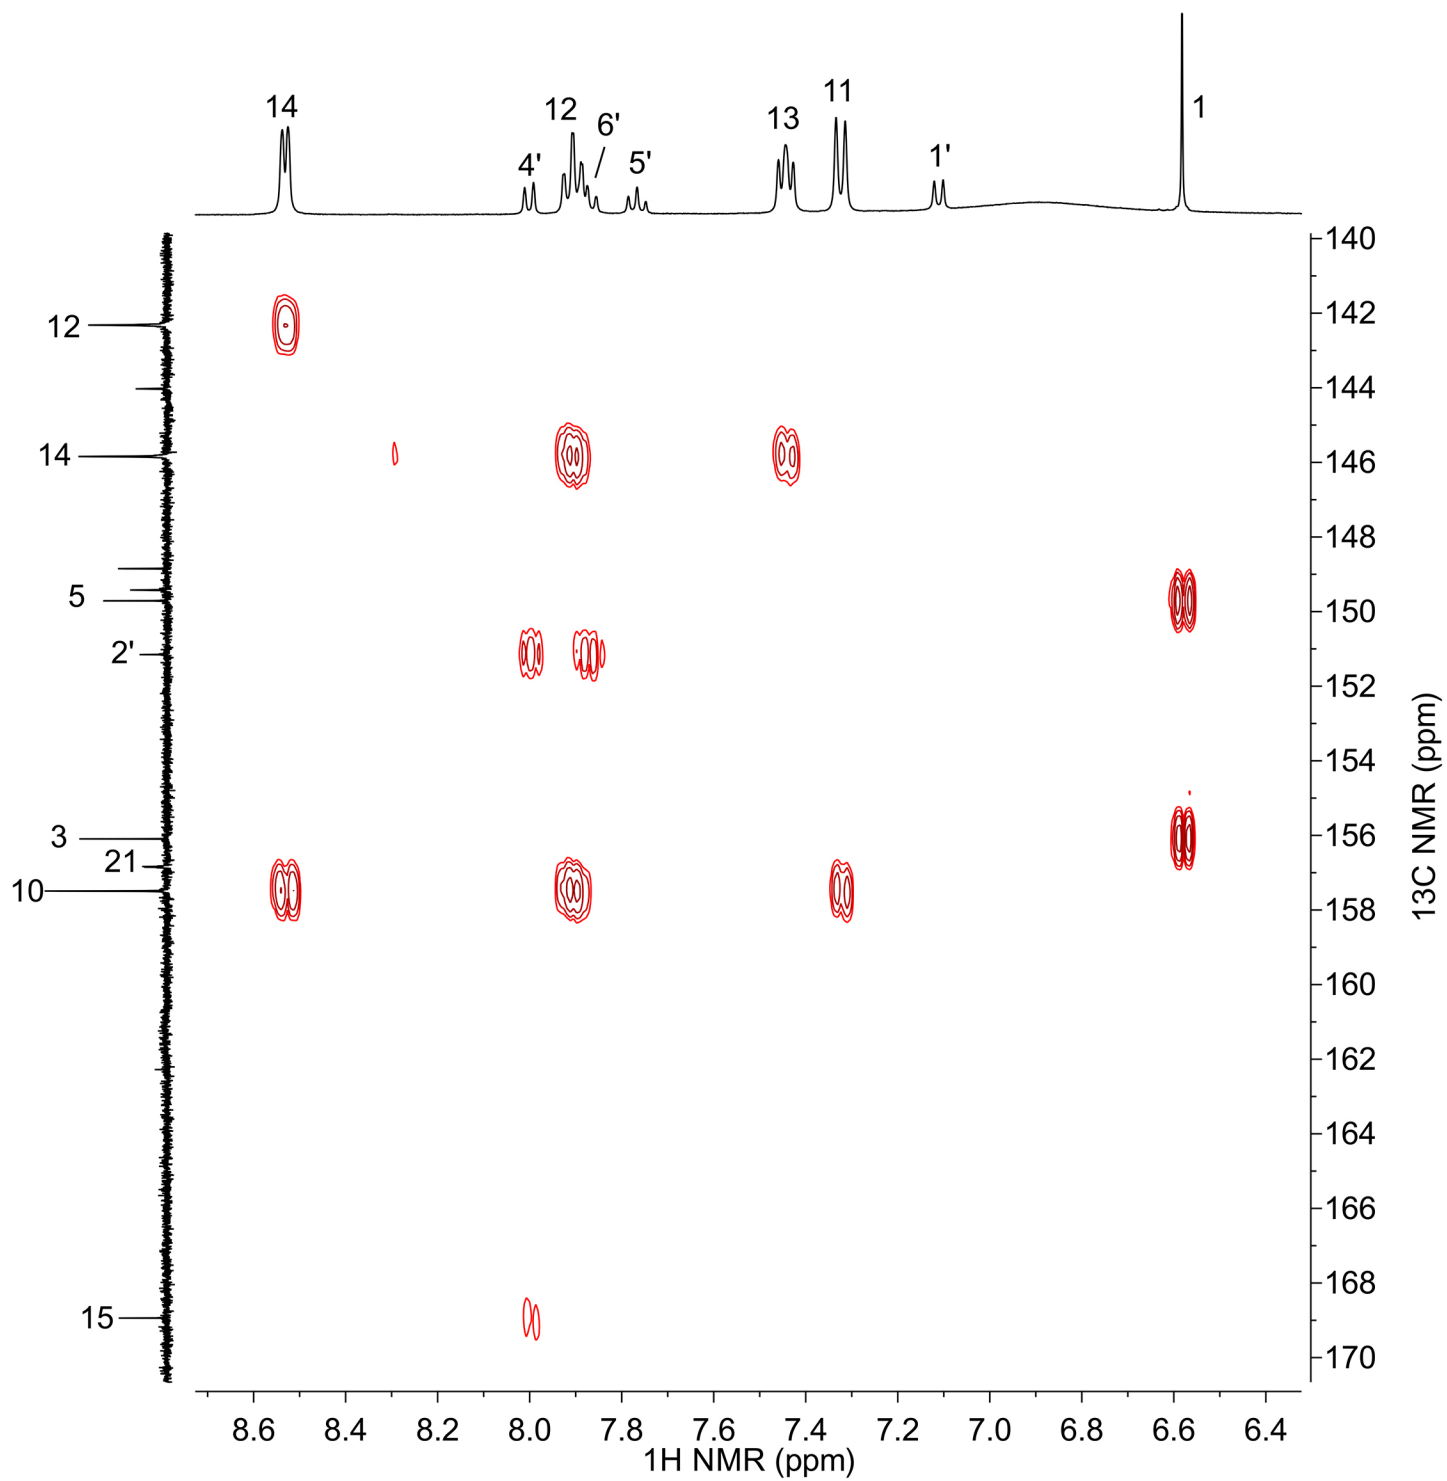

**Figure S120.** Expansion of  $^1\text{H}$ - $^{13}\text{C}$  HMBC spectrum of **4** from 6.4 to 8.6 ppm ( $^1\text{H}$ ) and 140 to 170 ppm ( $^{13}\text{C}$ ).

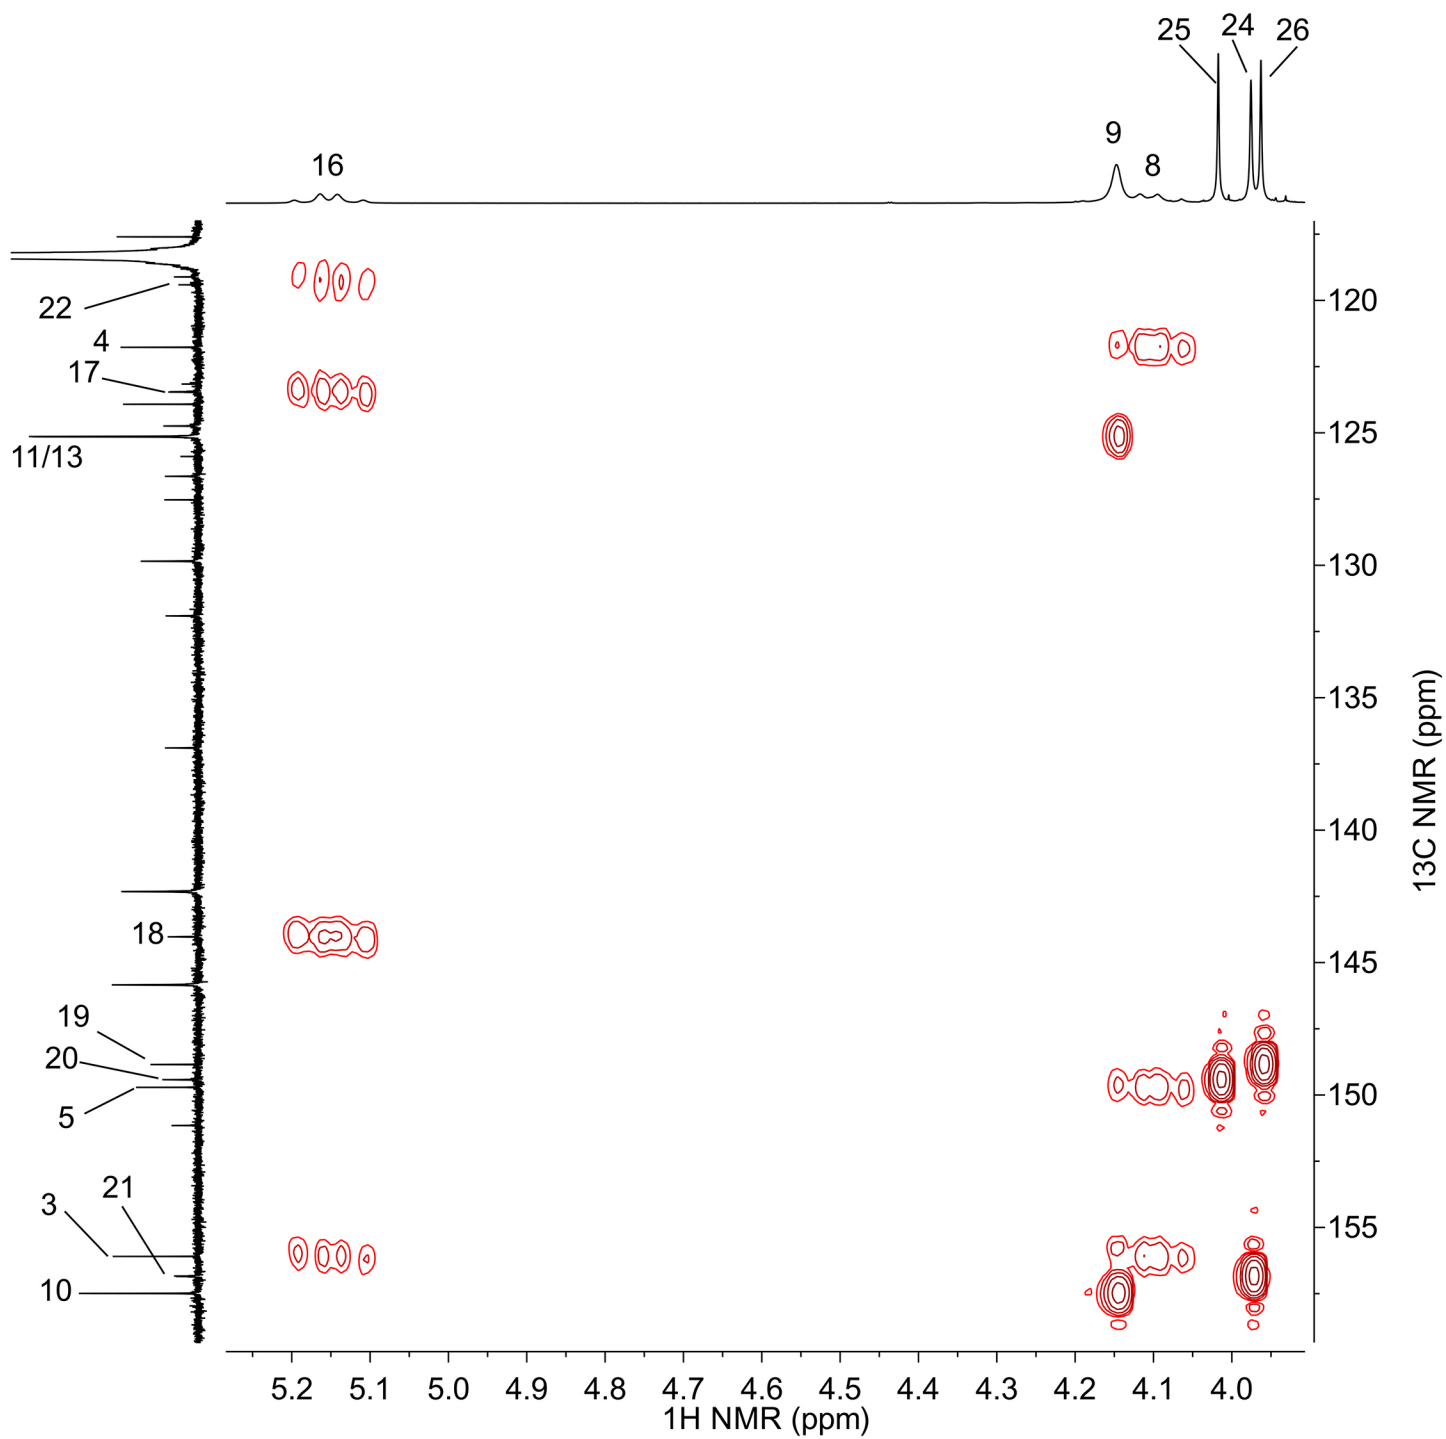

**Figure S121.** Expansion of  $^1\text{H}$ - $^{13}\text{C}$  HMBC spectrum of **4** from 3.9 to 5.3 ppm ( $^1\text{H}$ ) and 115 to 160 ppm ( $^{13}\text{C}$ ).

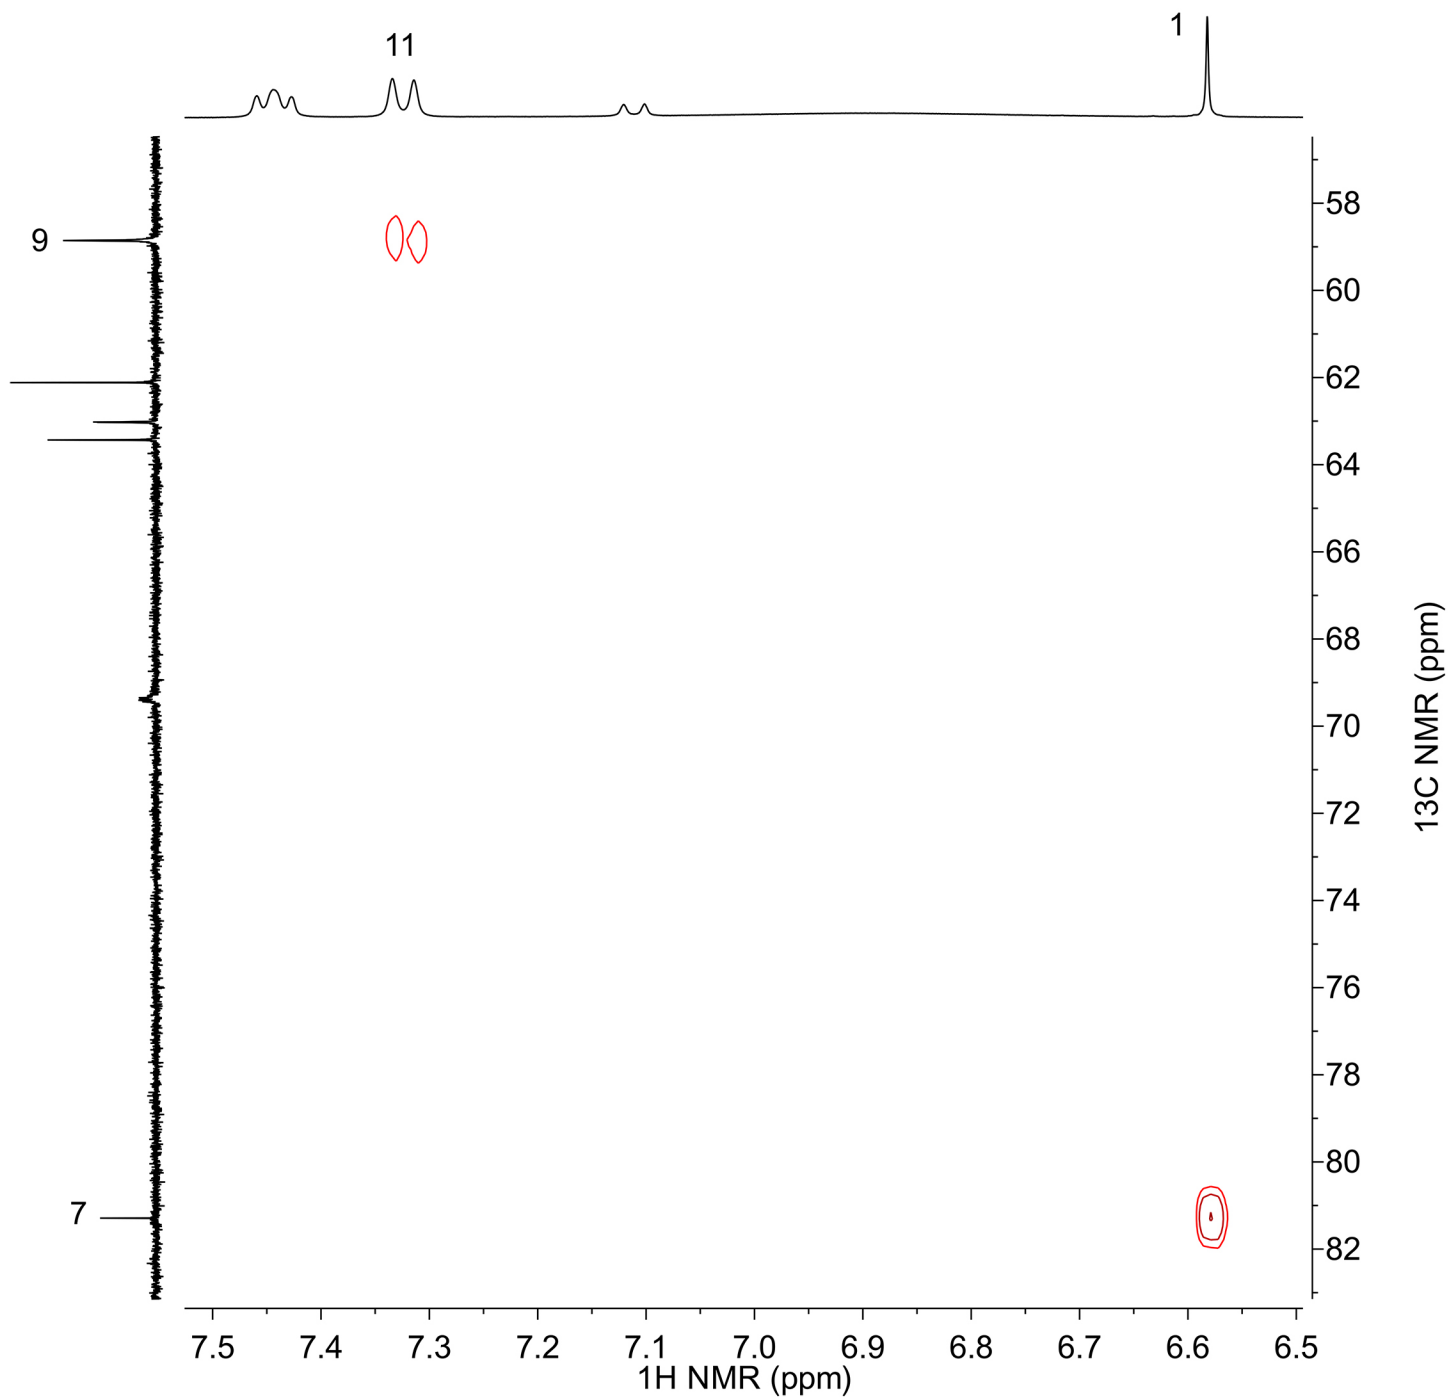

**Figure S122.** Expansion of  $^1\text{H}$ - $^{13}\text{C}$  HMBC spectrum of **4** from 6.5 to 7.5 ppm ( $^1\text{H}$ ) and 57 to 83 ppm ( $^{13}\text{C}$ ).



## References.

1. Walkup, G. K.; Burdette, S. C.; Lippard, S. J.; Tsien, R. Y., *J. Am. Chem. Soc.* **2000**, *122*, 5644-5645.
2. Zastrow, M. L.; Radford, R. J.; Chyan, W.; Anderson, C. T.; Zhang, D. Y.; Loas, A.; Tzounopoulos, T.; Lippard, S. J., *ACS Sens.* **2016**, *1*, 32-39.
3. Gottlieb, H. E.; Kotlyar, V.; Nudelman, A., *J. Org. Chem.* **1997**, *62*, 7512-7515.
4. Apfel, C.; Banner, D. W.; Bur, D.; Dietz, M.; Hubschwerlen, C.; Locher, H.; Marlin, F.; Masciadri, R.; Pirson, W.; Stalder, H., *J. Med. Chem.* **2001**, *44*, 1847-1852.
5. Li, L.; Mu, X.; Liu, W.; Wang, Y.; Mi, Z.; Li, C.-J., *J. Am. Chem. Soc.* **2016**, *138*, 5809-5812.
6. Pincioli, V.; Biancardi, R.; Visentin, G.; Rizzo, V., *Org. Process Res. Dev.* **2004**, *8*, 381-384.
7. Frisch, M. J.; Trucks, G. W.; Schlegel, H. B.; Scuseria, G. E.; Robb, M. A.; Cheeseman, J. R.; Scalmani, G.; Barone, V.; Mennucci, B.; Petersson, G. A.; Nakatsuji, H.; Caricato, M.; Li, X.; Hratchian, H. P.; Izmaylov, A. F.; Bloino, J.; Zheng, G.; Sonnenberg, J. L.; Hada, M.; Ehara, M.; Toyota, K.; Fukuda, R.; Hasegawa, J.; Ishida, M.; Nakajima, T.; Honda, Y.; Kitao, O.; Nakai, H.; Vreven, T.; Montgomery Jr., J. A.; Peralta, J. E.; Ogliaro, F.; Bearpark, M. J.; Heyd, J.; Brothers, E. N.; Kudin, K. N.; Staroverov, V. N.; Kobayashi, R.; Normand, J.; Raghavachari, K.; Rendell, A. P.; Burant, J. C.; Iyengar, S. S.; Tomasi, J.; Cossi, M.; Rega, N.; Millam, N. J.; Klene, M.; Knox, J. E.; Cross, J. B.; Bakken, V.; Adamo, C.; Jaramillo, J.; Gomperts, R.; Stratmann, R. E.; Yazyev, O.; Austin, A. J.; Cammi, R.; Pomelli, C.; Ochterski, J. W.; Martin, R. L.; Morokuma, K.; Zakrzewski, V. G.; Voth, G. A.; Salvador, P.; Dannenberg, J. J.; Dapprich, S.; Daniels, A. D.; Farkas, Ö.; Foresman, J. B.; Ortiz, J. V.; Cioslowski, J.; Fox, D. J. *Gaussian 09*, Gaussian, Inc.: Wallingford, CT, USA, 2009.
8. Barone, V.; Cossi, M., *J. Phys. Chem. A* **1998**, *102*, 1995-2001.
9. Cossi, M.; Rega, N.; Scalmani, G.; Barone, V., *J. Comput. Chem.* **2003**, *24*, 669-681.
10. Kowalczyk, T.; Lin, Z.; Voorhis, T. V., *J. Phys. Chem. A* **2010**, *114*, 10427-10434.
11. Burdette, S. C.; Walkup, G. K.; Spingler, B.; Tsien, R. Y.; Lippard, S. J., *J. Am. Chem. Soc.* **2001**, *123*, 7831-7841.
